# Supplementary material for: Principles of RNA recruitment to viral ribonucleoprotein condensates in a segmented dsRNA virus
Source: eLife. 2023 Jan 26;12:e68670. doi: 10.7554/eLife.68670 (PMC9925054; doi:10.7554/eLife.68670)
Supplement: Figure 1—source data 1. [file elife-68670-fig1-data1.xlsx]

## Sheet: Fig1e_PCC
3 hpi	4 hpi	5 hpi
0.88	0.92	0.68
0.86	0.9	0.86
0.8	0.9	0.72
0.51	0.96	0.79
0.88	0.96	0.89
0.87	0.82	0.87
0.87	0.76	0.9
0.9	0.97	0.55
0.86	0.82	0.85
0.87	0.9	0.41
	0.91	0.77
	0.91	0.86
	0.72	0.91
	0.9	0.82
	0.87	0.71
	0.88	0.64
	0.75	0.84
	0.83	0.85
	0.95	0.81
	0.93	0.49
	0.96	0.77
	0.87	0.86
	0.6	0.82
	0.82	0.8
	0.85	0.85
	0.78	0.82
	0.81	0.83
	0.81	0.73
	0.69	0.83
	0.83	0.76
	0.82	0.83
		0.8
		0.87
		0.8
		0.75
		0.85
		0.93
		0.85
