# Supplementary material for: Principles of RNA recruitment to viral ribonucleoprotein condensates in a segmented dsRNA virus
Source: eLife. 2023 Jan 26;12:e68670. doi: 10.7554/eLife.68670 (PMC9925054; doi:10.7554/eLife.68670)
Supplement: Figure 2—source data 1. — Pearson’s correlation coefficients (PCCs) of colocalising Seg3 and Seg4 transcripts. [file elife-68670-fig2-data1.csv]

2 hpi	4 hpi	6 hpi
0.04	0.66	0.44
0.03	0.67	0.75
0.02	0	0.47
0.03	0.05	0.81
0.07	0.01	0.8
0.05	0.01	0.51
0.02	0.65	0.84
0.01	0.02	0.68
0.02	0.83	0.61
0.06	0.65	0.51
0.22	0.71	0.54
0.02	0.71	0.72
0.06	0.06	0.75
0.05	0.03	0.36
0.02	0.8	0.46
0.04	0.56	0.36
0.1	0.05	0.38
0.03	0.68	0.81
0.02	0.05	0.47
0.03	0.34	0.43
0.15	0.86	0.69
0.08	0.02	0.77
0.03	0.06	0.49
0.02	0.01	0.72
0.03	0.01	0.4
0.01	0.89	0.83
0.04	0.06	0.83
0.07	0.15	0.79
0.06	0.8	0.81
0.02	0.8	0.83
0.46	0.03	0.57
0.02	0.02	0.41
0.02	0.01	0.58
0.02	0.08	0.75
0.01	0.01	0.8
0.04	0.07	0.66
0.03	0	0.88
	0.86	0.47
	0.04	0.64
	0.41	0.79
	0	0.87
	0.86	0.87
	0.42	0.83
	0.87	0.8
	0.91	0.6
	0.85	0.72
	0.4	0.89
	0.86	0.34
	0.92	0.52
	0.86	0.44
	0.08	0.88
	0.73
	0.06
	0.07
	0.15
	0.95
	0.95
	0.94
	0.75
	0.66
	0.96
	0.3
