# Supplementary material for: Principles of RNA recruitment to viral ribonucleoprotein condensates in a segmented dsRNA virus
Source: eLife. 2023 Jan 26;12:e68670. doi: 10.7554/eLife.68670 (PMC9925054; doi:10.7554/eLife.68670)
Supplement: Figure 2—source data 3. — Each spot was detected after applying a constrained deconvolution algorithm (see Methods). [file elife-68670-fig2-data3.xlsx]

## Sheet: Sheet1
Seg3			Seg4
2 hpi	4 hpi		2 hpi	4 hpi
24003.1	516357		78960.5	593036
14952.1	450767		14753.8	590869
13064.1	353768		11001.7	517745
7091.28	299879		8084.9	507958
6372.24	281835		4580.11	488476
5997.22	271357		3851.21	476229
5519.43	266835		3733.18	411854
4831.36	265607		3690.06	406688
4713.95	251984		3522.65	403920
4082.83	222829		3469.01	403908
4012.6	218467		3335.57	379213
3644.9	215154		3329.08	368938
3555.88	208119		3279.09	352986
3444.43	201694		3277.39	349557
3438.08	187771		3178.24	342952
3395.83	187599		3144.91	318388
3325.44	182318		3143.32	312708
3291.23	174967		3099.65	304356
3254.58	168262		3040.6	271565
3253.84	167796		3014.62	243961
3198.55	166213		3008.14	243469
3195.85	162822		2954.24	243428
3135.31	160798		2933.89	211803
3129.36	155037		2932.16	209627
3118.87	152658		2922.14	201981
3101.56	146991		2854.98	192313
3092.13	134645		2852.47	182929
3074.95	131879		2850.12	182770
3062.7	127393		2832.43	181932
3062.54	122404		2806.08	178866
3057.93	115353		2783.11	160790
3025.23	104009		2779.38	157352
3019.42	92643.9		2769.23	147221
3010.92	87306.5		2766.76	142444
2997.4	85738		2752	136864
2977.76	79745.7		2734.24	125356
2977.2	76522.2		2729.94	117709
2967.24	75589.3		2726.8	117616
2950.51	62163.9		2726.27	110705
2928.48	61820		2722.43	110670
2923.13	59061.7		2720.7	110040
2921.51	52209.7		2719.72	106682
2903.35	49232.8		2711.26	105850
2898.94	48314.9		2707.76	104415
2895.56	47355.9		2696.99	91922.5
2893.08	47199.9		2691.79	85981.4
2891.68	45397.3		2685.27	73217.1
2873.73	45176.4		2679.81	69298.1
2869.36	43849.1		2679.32	62133.4
2861.31	39751.4		2666.82	57437.3
2851	39145.4		2665.63	52685.3
2820.92	33893.2		2663.79	51046.1
2813.48	33525.8		2652.53	46083.9
2808.06	29772.2		2642.2	45654.5
2801.86	25871.9		2632.78	42481.9
2778.85	23581.9		2630.94	40448.3
2769.36	22299.6		2628.1	38835.2
2744.89	20655.5		2608.83	36309.1
2739.32	19730.7		2600.44	35586.2
2738.72	16081.9		2591.07	33450.9
2720.09	13520.3		2590.95	32090.3
2717.48	12405.7		2590.58	31771.3
2708.86	11092.2		2588.57	27365.9
2708.34	11069.4		2582.77	24663.1
2705.78	10800.3		2576.38	18780.7
2705.43	10082.7		2561.55	18677.9
2704.71	10040.9		2560.47	15892.5
2694.25	9990.6		2558.77	15271.9
2687.02	9861.35		2557.23	14804.8
2685.72	9824.56		2551.36	14445.9
2682.11	9760.46		2549.25	14322.4
2678.25	9749.13		2540.35	13772.8
2677.2	9446.03		2537.68	13180.1
2674.47	9235.82		2537.05	12802.3
2667.34	9017.41		2532.94	12452.2
2664.74	8645.12		2529.19	12430.4
2653.42	8547.27		2527.79	12406
2649.96	8522.61		2524.15	12088.8
2644.39	8384.06		2516.22	11943.8
2642.37	8368.46		2503.13	11930.2
2636.88	8359.51		2502.03	11771.2
2635.86	8138.41		2498.88	11744.3
2629.6	8062.15		2495.8	11614.2
2629.51	7978.1		2495.66	11514.8
2628.44	7951.03		2494.13	11384.5
2628.15	7949.25		2489.53	11253.9
2622.8	7784.42		2486.24	11241.6
2616.34	7756.65		2477.35	11053
2610.25	7638.57		2468.24	10801.5
2605.08	7624.02		2466.38	10773.3
2602.87	7609.04		2466.18	10687.1
2598.69	7475.67		2450.91	10613
2595.91	7360.83		2447.32	10572.9
2593.04	7327.3		2443.96	10464.1
2591.61	7279.87		2442.69	10441.6
2590.66	7256.51		2439.69	10312.7
2589.22	7126.74		2438.81	10293.2
2588.4	7070.83		2437.87	10272
2585.89	7052.99		2436.75	10260.6
2584.58	7036.69		2434.71	10239.3
2572.12	6992.55		2429.78	10201.3
2571.93	6945.46		2423.94	10197.6
2565.68	6944.61		2420.74	10191.7
2564.22	6887.06		2417.28	10173.2
2563.88	6848		2416.69	10093.6
2561.04	6838.78		2415.72	10037.3
2556.8	6835.61		2410.98	10020.5
2556.78	6801.34		2408.7	10005.6
2556.17	6709.91		2400.62	9954.74
2555.92	6691.96		2396.87	9951.99
2554.22	6666.19		2396.78	9928.58
2553.59	6642.65		2395.56	9868.43
2550.22	6614.52		2391.69	9836.46
2547.17	6611.09		2382.69	9825.43
2544.23	6603.19		2381.55	9819.46
2541.29	6599.29		2377.59	9805.24
2541.25	6598.65		2374.14	9768.27
2530.03	6584.32		2373.75	9765.61
2524.59	6556.74		2372.57	9718.62
2511.04	6555.62		2366.34	9675.13
2509.68	6549.81		2364.15	9665.2
2506.39	6521.93		2363.35	9656.49
2504.84	6516.24		2361.47	9647.65
2504.18	6507.9		2355.18	9633.78
2503.32	6461.27		2347.02	9576.92
2499.78	6455.99		2340.95	9569.81
2499.17	6450.86		2339.13	9561.83
2497.56	6424.32		2333.62	9561.41
2497.43	6383.25		2330.74	9511.03
2495.49	6346.82		2327.73	9492.82
2494.62	6327.45		2321.39	9478.3
2488.39	6324.18		2318.95	9473.43
2476.06	6305.93		2314.32	9423.35
2471.3	6209.95		2312.7	9381.06
2467.64	6190.73		2308.56	9354.97
2448.69	6188.9		2302.74	9353.42
2448.13	6161.42		2298.36	9348.48
2440.22	6142.55		2297.89	9326.75
2437.95	6111.65		2293.27	9288.38
2433.35	6100.2		2293.21	9279.82
2429.76	6097.5		2290.82	9262.35
2427.51	6094.53		2290.39	9235.03
2427.42	6079.84		2288.7	9209.62
2425.64	6076.9		2285.73	9189.68
2425.2	6066.35		2281.86	9179.82
2422.22	6050.24		2277.92	9173.97
2414.83	6044.31		2277.67	9169.81
2412.3	6027.36		2272.94	9167.65
2411.61	6022		2270.6	9166.64
2409.13	6000.25		2269.81	9145.44
2406.53	5977.93		2267.24	9112.22
2402.96	5973		2259.83	9098.94
2401.89	5924.24		2259.56	9077.92
2401.03	5921.42		2259.42	9075.95
2399.53	5881.25		2255.51	9063.17
2397.86	5875.71		2255.31	9024.85
2396.4	5872.16		2251.89	9016.89
2392.54	5840.27		2243.66	9000.9
2388.28	5824.99		2241.26	8995.6
2382.78	5805.1		2237.1	8985.3
2382.56	5801.91		2235.06	8983.55
2381.03	5793.97		2234.54	8926.19
2371.11	5781.82		2229.34	8920.31
2368.66	5781.24		2229.15	8860.27
2364.49	5724.87		2228.85	8860.23
2350.91	5698.53		2226.45	8856.37
2349.32	5691.08		2223.92	8850.19
2346.64	5680.92		2222.18	8779.72
2345.68	5676.25		2221.93	8763.26
2344.38	5671.98		2221.04	8722.83
2340.37	5656.74		2219.17	8707.52
2339.33	5637.21		2212.68	8697.99
2339.11	5615.12		2209.36	8694.25
2333.84	5614.04		2205.14	8676.35
2329.9	5610.36		2204.46	8673.43
2325.77	5596.25		2203.98	8666.75
2324.88	5594.55		2199.6	8655.42
2324.39	5582.12		2199.39	8651.93
2324.07	5579.28		2198.42	8635.99
2322.21	5545.03		2197.55	8631.11
2315.41	5540.95		2196.37	8622.86
2314.99	5522.12		2193.36	8603.62
2313.16	5521.03		2193.12	8601.98
2308.98	5496.98		2192.89	8582.66
2306.06	5490.31		2184.02	8565.15
2306.05	5468.13		2182.01	8541.64
2301.47	5429.87		2181.58	8534.88
2299.67	5427.41		2181.13	8510.48
2294.6	5423.43		2181.06	8501.62
2293.14	5415.07		2179.75	8486.12
2292.87	5409.6		2177.43	8480.06
2291.51	5381.58		2172.74	8479.32
2289.75	5373.48		2172.21	8479.09
2288.22	5369.66		2166.63	8461.86
2286.33	5361.03		2166.1	8461.79
2284.03	5355.55		2166.04	8442.62
2279.99	5354.74		2163.62	8435.37
2275.21	5354.67		2162.43	8413.68
2274.42	5350.89		2161.3	8410.78
2272.76	5350.64		2159.97	8372.45
2270.98	5339.43		2154.73	8321.78
2268.72	5334.39		2153.69	8310.06
2266.17	5324.37		2148.39	8301.33
2265.35	5304.66		2144.79	8300.72
2264.76	5290.03		2144.38	8295.75
2264.75	5284.14		2143.79	8265.53
2263.63	5279.8		2143.43	8261.29
2260.31	5255.28		2142.88	8236.85
2257.51	5254.07		2142.22	8235.39
2256.24	5253.11		2141.22	8232.03
2254.43	5250.36		2136.12	8229.61
2253.98	5240.41		2135.21	8213.98
2252.96	5236.97		2128.79	8194.48
2251.9	5236.59		2128.6	8182.89
2249.87	5231.3		2128.58	8152.72
2249.52	5216.43		2128.11	8136.37
2246.51	5204.85		2125.21	8123.75
2245.62	5197.28		2122.39	8116.23
2244.64	5191.38		2119.72	8113.73
2244.2	5189.91		2117.77	8101.28
2244.08	5182.73		2117.7	8100.15
2242.64	5181.39		2113.09	8098.46
2242.21	5159.13		2109.76	8050
2239.8	5157.41		2107.99	8044.46
2239.31	5150.78		2107.19	8043.57
2237.26	5143.26		2106.81	8030.7
2236.76	5143.16		2106.5	8029.95
2235.13	5141.82		2105.21	8025.9
2231.05	5130.01		2103.53	8014.19
2231.02	5126.74		2103.31	7975.75
2229.5	5125.18		2100.59	7973.57
2229.49	5122.32		2099.89	7971.4
2229.34	5120.3		2097.93	7961.49
2228.68	5111.54		2094.46	7950.91
2224.97	5104.72		2094.12	7939.26
2224.4	5093.75		2093.59	7926.77
2222.91	5076.67		2089.17	7913.64
2221.63	5075.51		2085.4	7900.74
2220.52	5068.17		2084.87	7895.82
2220.49	5066.97		2084.15	7892.09
2211.86	5066.76		2083.18	7889.15
2206.91	5064.48		2083.08	7879.08
2206.87	5046.87		2082.94	7859.66
2204.76	5046.86		2081.66	7844.03
2203.63	5046.43		2081.32	7839.66
2201.42	5044.5		2080.83	7839.47
2201.29	5038.01		2079.82	7827.02
2195.63	5023.77		2078.69	7824.9
2195.16	5023.66		2077.67	7823.39
2188.83	5019.98		2077.17	7810.51
2182.41	5019.76		2075.97	7808.67
2182.17	5012.13		2074.25	7807.71
2180.44	5002.74		2070.46	7806.31
2176.24	5002.42		2069.73	7798.72
2174.64	4988.3		2065.74	7787.34
2173.75	4984.82		2063.09	7763.26
2171.97	4981.34		2060.39	7761.5
2170.9	4956.53		2060	7755.47
2170.02	4946.74		2059.93	7755.03
2167.22	4939.35		2059.67	7745.21
2167.11	4932.41		2057.65	7744.41
2166.57	4926.36		2057.39	7733.58
2166.36	4904.72		2056.56	7723.09
2164.72	4901.31		2055.93	7711.28
2162.88	4898.67		2049.96	7710.31
2158.72	4888.44		2049.9	7709.95
2155.71	4882.06		2045.68	7706.98
2154.73	4879.9		2044.96	7703.54
2153.87	4837.15		2043.54	7699.31
2152.66	4835.91		2043.49	7677.52
2150.81	4832.74		2041.69	7674.82
2146.55	4823.3		2040.62	7672.88
2144.77	4821.97		2037.29	7665.44
2144.77	4817.3		2035.35	7648.8
2144.1	4817.18		2034.37	7639.36
2138.15	4817.04		2034.05	7635.87
2137.88	4804.1		2033.84	7635.44
2136.66	4803.67		2032.53	7621.49
2135.55	4803.44		2030.37	7614.62
2130.12	4801.75		2029.46	7609.61
2126.9	4799.23		2029.39	7575.9
2126.77	4798.41		2029.07	7572.6
2125.91	4794.11		2028.2	7572.43
2122.8	4788.76		2022.92	7572.32
2118.67	4785.22		2022.62	7571.38
2115.78	4782.91		2022.31	7568.01
2115.49	4759.15		2021.78	7560.27
2113.91	4756.25		2020.9	7558.33
2112.88	4746.55		2018.78	7556.3
2111.47	4744.05		2018.19	7550.06
2109.59	4742.12		2016.01	7547.6
2109.03	4732.05		2015.61	7537.29
2108.72	4713.72		2013.62	7513.54
2107.35	4698.68		2012.13	7512.09
2105.98	4682.99		2011.52	7508.69
2105.14	4678.45		2010.84	7505.37
2104.46	4676.68		2010.46	7498.42
2101.16	4674.21		2009.61	7494.46
2099.23	4666.28		2008.56	7476.6
2097.59	4660.31		2007.67	7472.23
2096.28	4658.54		2007.46	7465.81
2093.8	4649.79		2006.79	7463.64
2092.94	4639.92		2005.03	7459.33
2091.71	4635		2003.27	7457.58
2089.03	4632.38		2002.43	7456
2087.91	4621.77		2000.84	7440.6
2087.49	4611.03		2000.12	7439.17
2086.2	4599.34		1996.57	7438.65
2085.91	4597.93		1995.63	7438.53
2085.65	4597.88		1995.15	7438.39
2085.56	4583.61		1994.65	7413.69
2083.15	4580.14		1990.44	7412.28
2082.26	4577.5		1990.05	7407.83
2080.9	4577.32		1989.86	7401.44
2079.76	4569.88		1989.13	7401.42
2079.24	4566.97		1988.71	7391.57
2079.03	4558.74		1988.67	7374.11
2078.94	4546.43		1987.46	7349.26
2078.68	4542.89		1987.11	7334.94
2076.41	4542.84		1986.38	7318.56
2075.22	4541.65		1983.72	7300.91
2074.89	4538.03		1983.69	7298.79
2071.59	4537.62		1980.33	7293.22
2071.23	4534.38		1980.01	7271.9
2070.38	4521.9		1979.61	7270.04
2067.67	4520.61		1978.02	7260.98
2067.34	4517.74		1977.83	7252
2066.15	4515.02		1976.24	7248.58
2065.28	4513.94		1972.12	7246.52
2064.26	4504.19		1971.7	7245.53
2063.8	4502.69		1969.43	7243.88
2060.38	4502.09		1968.74	7234.94
2056.25	4500.93		1965.25	7231.5
2054.65	4499.28		1964.59	7226.98
2050.87	4486.87		1964.48	7218.56
2050.25	4479.74		1961.58	7214.39
2048.96	4478.69		1961.05	7202.79
2048.46	4472.33		1959.52	7199.28
2044.49	4470.71		1955.83	7198.29
2042.91	4468.38		1954.46	7196.36
2042.4	4462.87		1954.31	7179.87
2042.35	4453.36		1953.26	7176.51
2042.13	4451.1		1951.47	7174.69
2041.48	4432.81		1950.97	7167.97
2037.84	4415		1950.82	7167.19
2037.76	4410.85		1947.44	7161.61
2037.48	4409.69		1946.99	7155.34
2037.24	4403.16		1946.05	7147.03
2033.81	4398.77		1944.14	7137.01
2031.42	4395.45		1942.07	7134.76
2030.92	4393.03		1942.06	7120.01
2030.05	4387.06		1940.16	7115.57
2029.64	4382.43		1937.76	7114.5
2027.67	4381.51		1936.07	7113.29
2027.67	4381.4		1936.04	7104.99
2027.32	4368.78		1931.09	7098.72
2026.72	4368.19		1928.97	7090.56
2026.38	4367.24		1927.88	7082.73
2025.92	4365.95		1926.7	7082.28
2023.68	4353.95		1923.27	7071.12
2020.86	4347.82		1922.25	7069.19
2020.09	4347.24		1921.56	7065.51
2019.47	4333.16		1921.32	7062.88
2019.4	4327.21		1920.69	7059.72
2018.96	4319.19		1920.14	7058.23
2016.73	4291.7		1918.98	7037.09
2016.37	4291.21		1918.83	7035.89
2014.38	4287.18		1918.27	7031.37
2011.2	4280.13		1917.04	7025.24
2003.77	4279.57		1916.65	7021.56
2003.29	4279		1916.56	7021.13
2000.99	4275.9		1916.12	6993.42
1999.76	4262		1914.43	6992.98
1998.61	4254.22		1913.76	6988.14
1996.23	4243.54		1913.51	6983.66
1992.92	4243.17		1913.51	6983.42
1992.4	4239.79		1913.2	6982.24
1992.3	4236.22		1911.94	6981.96
1991.35	4235		1911.22	6976.69
1989.76	4233.29		1911.19	6971.14
1989.48	4224.25		1910.12	6968.21
1988.7	4217.81		1909.05	6953.63
1987.61	4216.75		1908.37	6950.96
1986.82	4216.12		1905.63	6941.19
1986.66	4214.48		1904.78	6935.35
1981.85	4196.51		1904.28	6929.76
1981.45	4195.32		1904.16	6924.46
1981.27	4190.16		1903.05	6924.2
1979.54	4189.33		1899.4	6922.42
1977.86	4188.6		1897.61	6919.59
1975.83	4186.69		1896.75	6915.32
1975.52	4183.44		1895.47	6912.66
1974.89	4182.91		1895.04	6912.31
1974.16	4167.61		1894.9	6909.96
1974.11	4165.58		1893.59	6903.97
1973.5	4162.68		1892.42	6895.57
1970.07	4160.92		1892.21	6891.64
1966.88	4156.64		1890.91	6887.46
1964.78	4156.28		1890.77	6885.21
1959.93	4154.95		1889.96	6881.31
1959.12	4154.02		1889.73	6878.74
1957.56	4148.96		1888.22	6878.61
1957.04	4147.94		1886.54	6875.27
1955.65	4145.77		1883.09	6871.46
1954.43	4142.01		1882.16	6869.48
1954.29	4141.96		1879.62	6858.99
1952.69	4141.77		1877.16	6858.74
1950.95	4141.49		1876.12	6858.42
1950.83	4140.06		1874.36	6850.48
1949.87	4138		1873.01	6846.8
1948.14	4135.78		1869.74	6836.28
1948.12	4124.47		1869.49	6830.32
1945.7	4120.62		1868.39	6829.63
1945.37	4115.66		1867.9	6829.58
1942.62	4115.39		1867.21	6826.97
1940.92	4114.85		1865.63	6809.2
1939.07	4113.56		1864.53	6808.78
1938.9	4111.3		1863.89	6803.4
1936.91	4104.02		1862.93	6799.79
1935.74	4103.51		1862.78	6783.46
1934.97	4103.19		1861.95	6782.73
1934.45	4097.59		1860.47	6777.16
1932.8	4091.83		1858.82	6770.57
1930.68	4089.66		1857.96	6769.99
1930.11	4088.36		1857.88	6769.8
1929.75	4085.42		1856.15	6764.83
1929.56	4081.58		1854.04	6760.08
1926.05	4081.08		1853.12	6759.51
1923.97	4080.93		1850.57	6759.45
1923.34	4078.04		1850.09	6752.02
1922.42	4077.96		1850.09	6751.09
1922.18	4077.23		1848.67	6750.99
1921.87	4076.87		1848.2	6746.21
1921.59	4068.7		1848.15	6735.81
1919.48	4065.77		1847.16	6729.59
1918.34	4064.83		1846.84	6728.43
1918.29	4061.55		1846.42	6728.2
1917.34	4050.47		1846.18	6727.52
1916.79	4050		1845.09	6727.18
1916.24	4048.25		1844.97	6726.19
1915.04	4043.49		1844.4	6724.77
1914.75	4042.95		1844.37	6722.65
1911.23	4041.55		1841.71	6718.64
1910.71	4039.92		1840.72	6716.43
1909.57	4039.81		1840.49	6708.7
1908.94	4029.06		1839.74	6705.58
1908.76	4028.92		1839.46	6696.61
1908.58	4025.98		1837.67	6695.68
1908.19	4025.11		1836.84	6695.23
1907.5	4014.07		1836.62	6693.11
1907.37	4013.11		1835.29	6692.72
1906.95	4011.52		1834.7	6688.23
1905.89	4011.05		1834.1	6675.02
1902.37	4011.01		1833.83	6666.81
1902.26	4005.89		1833.51	6664.94
1902.21	4003.88		1832.78	6655.62
1901.68	4000.96		1831.95	6654.12
1900.04	3995.8		1831.17	6653
1898.7	3993.12		1830.96	6652.06
1897.33	3992.67		1830.73	6643.74
1897	3989.19		1830.29	6639.97
1895.07	3988.67		1828.84	6638.51
1893.19	3984.6		1828.23	6629.77
1893.1	3979.94		1828	6627.77
1892.85	3978.64		1827.09	6627.5
1892.37	3976.77		1826.9	6619.96
1892.09	3973.96		1826.31	6619.56
1890.58	3972.55		1826.07	6617.61
1890.37	3972.42		1825.53	6616.03
1890.16	3970.44		1824.14	6615.36
1889.78	3964.91		1824.04	6614.56
1889.72	3962.3		1822.2	6603.75
1889.69	3959.36		1821.82	6602.46
1888.29	3957.24		1821.52	6598.37
1883.58	3956.24		1819.1	6597.43
1883.09	3955.46		1817.72	6597.28
1881.38	3953.42		1816.74	6586.43
1880.12	3952		1816.08	6584.55
1880.03	3937.15		1815.77	6580.14
1879.8	3934.62		1815.64	6575.98
1879.61	3932.7		1815.58	6574.8
1879.55	3931.31		1814.97	6574.63
1878.82	3930.96		1814.88	6568.55
1874.09	3928.22		1814.74	6563.69
1872.23	3920.82		1813.86	6561.61
1871.53	3916.1		1813.38	6557.32
1870.21	3907.02		1812.31	6557.1
1866.58	3906.15		1812.03	6552.81
1863.31	3904.45		1811.76	6548.35
1863.03	3904.06		1810.62	6543.58
1862.59	3901.66		1808.95	6543.09
1862.31	3900.29		1808.8	6541.08
1861.49	3899.4		1808.72	6533.46
1861.49	3887.95		1806.32	6532.38
1861.35	3885.7		1806.04	6530.07
1859.85	3884.7		1805.65	6529.83
1858.65	3882.27		1805.4	6528.75
1857.87	3878.97		1804.26	6524.13
1856.68	3877.82		1804.23	6521.63
1855.25	3877.42		1803.1	6521.6
1854.78	3874.7		1803.07	6519.82
1854	3870.37		1800.6	6519.61
1853.05	3870.05		1799.45	6519.57
1852.3	3869.24		1797.38	6515.29
1851.24	3866.64		1795.74	6513.42
1849.54	3861.79		1794.47	6507.01
1845.12	3860.96		1794.34	6504
1844.9	3852.47		1790.95	6502.25
1842.75	3851.96		1789.85	6495.63
1841.82	3851.8		1786.54	6480.4
1841.34	3847.22		1785.69	6478.94
1837.74	3846.81		1784.39	6466.3
1837.33	3845.37		1783.81	6461.62
1835.02	3837.1		1783.49	6461.49
1833.45	3832.74		1779.52	6461.43
1832.3	3826.4		1779.38	6454.26
1830.34	3816.94		1779.32	6438.46
1827.79	3816.56		1778.84	6437.7
1827.12	3815.48		1777.19	6435.67
1825.53	3814.04		1774.2	6424.51
1825.34	3810.74		1774.08	6424.5
1825.23	3808.63		1773.13	6422.39
1824.9	3806.15		1772.86	6415.38
1824.08	3805.79		1772.65	6415.14
1823.46	3804.81		1770.19	6409.98
1821.28	3802.96		1767.55	6407.99
1820.57	3801.06		1765.74	6406.24
1820.37	3800.84		1765.68	6405.31
1819.79	3800.33		1765.19	6404.28
1818.46	3798.91		1764.73	6400.36
1817.75	3790.86		1762.84	6399.49
1817.1	3789.5		1762.55	6391.56
1816.2	3787.41		1762.07	6388.13
1815.21	3782.31		1761.79	6377.62
1812.59	3781.75		1760.46	6375.66
1812.57	3781.26		1759.96	6370.25
1810.42	3775.89		1759.78	6367.84
1809.56	3775.71		1758.86	6359.97
1808.37	3773.54		1758.67	6354.93
1807.94	3773.05		1755.58	6354.82
1807.51	3769.47		1755.4	6345.7
1806.71	3768.17		1754.9	6342.57
1806.24	3764.65		1754.88	6340.2
1805.03	3762.46		1754.61	6339.57
1803.49	3761.05		1753.67	6338.81
1803.25	3759.11		1752.32	6338.69
1802.74	3746.86		1750.88	6336.34
1802.67	3743.18		1750.32	6336.34
1801.22	3741.78		1748.56	6335.09
1801.14	3736.72		1748.17	6333.19
1799.65	3736.08		1747.49	6332.65
1799.2	3735.22		1746.09	6330.48
1798	3734.58		1745.41	6327.95
1798	3732.22		1745.32	6325
1797.53	3726.76		1745.05	6324.29
1797.47	3726.01		1744.25	6324.13
1792.55	3725.83		1744.05	6323.86
1791.76	3725.71		1744	6323.38
1789.86	3724.43		1743.99	6323.35
1789.84	3724.29		1743.55	6319.59
1788.7	3723.64		1742.5	6314.67
1782.96	3722.7		1740.78	6306.52
1782.9	3720.58		1739.66	6305.96
1781.7	3716.19		1738.12	6305.27
1778.74	3716.16		1736.28	6304.33
1778.49	3714.36		1734.79	6302.51
1776.78	3712.45		1734.78	6301.11
1776.62	3708.08		1734.53	6300.49
1775.13	3707.17		1730.03	6296.83
1774.23	3705.63		1729.88	6294.41
1772.92	3702.49		1728.33	6293.05
1771.93	3694.99		1728.17	6291.83
1770.22	3694.9		1728.08	6291.52
1769.84	3694.17		1727.72	6273.35
1768.94	3690.05		1727.61	6273.25
1768.87	3689.05		1726.26	6264.88
1767.76	3686.97		1726.05	6263.64
1767.53	3685.74		1725.79	6260.48
1763.98	3682.78		1725.15	6258.31
1763.78	3679.51		1725.03	6250.08
1763.48	3675.17		1724.51	6246.27
1763.08	3674.89		1723.54	6245.85
1762.86	3671.18		1722.3	6244.37
1761.77	3670.68		1722.29	6244.19
1761.13	3669.18		1721.05	6240.97
1757.14	3666.82		1720.97	6238.6
1756.14	3665.85		1720.91	6238.59
1752.97	3661.37		1720.64	6223.77
1752.1	3659.95		1719.48	6222.08
1751.94	3656.79		1718.88	6216.64
1751.71	3656.64		1716.52	6215.48
1751.56	3656.42		1715.98	6209.15
1751.14	3654.79		1714.62	6203.17
1749.76	3648.14		1713.95	6201.6
1749.74	3647.24		1713.28	6193.52
1749.38	3646.96		1713.15	6193.06
1749.26	3646.74		1712.03	6190.5
1748.79	3643.87		1711.19	6190.5
1745.84	3640.8		1710.52	6190.19
1745.25	3640.22		1710.49	6187.48
1744.68	3637.2		1707.86	6187.04
1744.55	3636.05		1705.09	6186.76
1743.06	3632.83		1704.72	6185.75
1742.55	3631.6		1704.68	6185.38
1742.33	3631.36		1704.04	6184.61
1740.5	3630.63		1703.97	6183.47
1740.15	3628.43		1703.33	6181.49
1738.46	3626.21		1701.37	6179.3
1736.94	3623.71		1701.33	6178.52
1733.38	3621.22		1699.95	6178.29
1732.03	3618.82		1698.92	6176.78
1730.41	3618.25		1698.72	6176.54
1729.87	3617.88		1698.41	6172.31
1727.43	3617.01		1698.08	6170.42
1726.52	3616.74		1694.86	6168.98
1725.6	3615.14		1693.37	6166.48
1723.11	3615.11		1691.92	6164.39
1722.16	3612.69		1691.43	6160.77
1719.38	3606.55		1690.82	6159.1
1715.52	3606.34		1690.24	6157.96
1713.76	3602.87		1690.23	6155.66
1713.22	3600.6		1689.55	6152.98
1712.9	3599.89		1688.95	6149.6
1712.75	3597.96		1686.91	6146
1712.71	3596.64		1686.7	6144.77
1712.51	3593.04		1685.98	6143.77
1711.56	3588.61		1685.83	6143.08
1711.1	3586.64		1683.16	6140.54
1708.25	3583.91		1682.15	6137.81
1707.96	3583.91		1681.9	6135
1707.09	3580.66		1681.76	6126.4
1707.01	3580.65		1680.78	6124.86
1706.1	3580.24		1678.31	6123.04
1705.08	3576.86		1678.25	6119.76
1704.64	3574.25		1676.41	6117.86
1703.75	3574.06		1675.2	6114.43
1703.25	3573.87		1675.14	6113.17
1701.14	3573.35		1674.06	6112.43
1699.64	3571.91		1672.22	6106.44
1699.17	3571.85		1669.01	6104.98
1698.79	3571.63		1668.14	6104.78
1698.24	3570.91		1668.06	6101.81
1697.8	3561.99		1666.21	6100.46
1692.91	3558.35		1666.14	6099.36
1689.83	3555.99		1666.01	6098.06
1689.15	3554.7		1665.62	6087.96
1687.5	3553.17		1664.8	6086.71
1686.38	3552.68		1664.72	6084.17
1685.95	3551.44		1664.64	6083.08
1684.72	3544.95		1663.93	6081.96
1684.57	3543.25		1663.17	6077.3
1682.86	3541.21		1662.39	6073.88
1681.65	3540.98		1662.19	6069.43
1680.8	3537.98		1661.64	6067.45
1679.75	3537.9		1659.81	6067.29
1679.36	3534.9		1658.13	6063.57
1678.22	3534.84		1657.84	6061.81
1676.03	3533.4		1655.18	6057.7
1675.27	3532.97		1654.97	6050.71
1674.59	3532.04		1654.23	6047.58
1673.87	3531.84		1653.38	6045.22
1673.77	3526.53		1652.87	6045.08
1673.33	3522.28		1652.56	6043.38
1673.3	3521.15		1646.8	6039.29
1671.68	3519.31		1645.77	6032.43
1671.44	3516.22		1645.65	6028.16
1671.18	3514.39		1645.1	6025.65
1670.17	3512.89		1643.63	6023.53
1668.59	3510.29		1643.52	6022.61
1668.3	3510.16		1641.55	6022.15
1667.72	3508.54		1640.71	6016.07
1667.19	3508.29		1639.5	6013.88
1667.02	3506.89		1639.26	6010.3
1666.46	3505.83		1638.26	6007.74
1663.76	3501.44		1637.23	6004.81
1662.36	3501.36		1637.12	6003.92
1662.15	3499.76		1637.12	6003.56
1662.04	3499.51		1636.22	5996.29
1661.83	3491.64		1635.94	5995.99
1661.73	3490.05		1635.84	5990.91
1661.18	3487.3		1635.8	5990.71
1661.15	3482.04		1633.78	5987.4
1660.85	3481.79		1633.12	5984.14
1660.6	3477.97		1632.81	5978.65
1659.87	3477.43		1632.38	5977.14
1659.68	3475.3		1632.22	5976.58
1658.77	3475.19		1629.13	5975.37
1656.78	3475.12		1628.52	5975.06
1656.05	3472.22		1628.31	5974.35
1655.33	3471.94		1627.78	5968.08
1654.01	3471.57		1626.77	5963.09
1652.77	3471.04		1626.45	5962.99
1651.86	3469.48		1624.92	5959.74
1650.85	3468.87		1624.52	5957.94
1650.85	3468.59		1624.51	5956.1
1649.88	3467.25		1624.17	5952.81
1647.17	3465.57		1620.29	5952.73
1646.87	3462.11		1618.62	5945.88
1646.25	3462.07		1617.46	5939.85
1643.78	3459.15		1616.56	5939.05
1643.2	3454.04		1616.29	5938.94
1643.16	3451.2		1614.78	5933.44
1642.43	3451.09		1614.38	5927.53
1641.69	3451.05		1613.76	5921.42
1641.66	3448.63		1613.63	5921.16
1640.07	3439.15		1612.38	5918.23
1639.13	3434.22		1612.23	5916.02
1639.01	3433.13		1606.5	5909.12
1638.74	3425.92		1606.29	5907.34
1638.07	3424.4		1603.43	5897.45
1636.4	3422.98		1598.66	5895.53
1635.46	3421.43		1597.18	5895.27
1635.34	3420.85		1597.05	5891.68
1635.2	3419.63		1596.83	5886.36
1628.29	3417.36		1596.17	5886.12
1627.86	3416.44		1593.37	5885.52
1626.66	3412.67		1593.36	5884.76
1626.57	3412.25		1592.29	5884.36
1625.83	3411.54		1591.36	5884.35
1625.39	3410.05		1590.11	5881.95
1625.09	3410.04		1590.06	5881.18
1623.54	3406.9		1589.69	5876.49
1622.51	3406.86		1589.39	5875.3
1621.28	3405.61		1587.82	5874.18
1621.26	3404.2		1587.06	5874.03
1620.91	3398.83		1586.02	5873.04
1620.87	3393.35		1585.86	5871.95
1619.8	3391.88		1585.61	5869.82
1617.06	3389.7		1585.54	5868.95
1615.67	3389.64		1583.19	5868.93
1614.21	3385.37		1582.07	5868.56
1610.39	3385.34		1578.96	5867.99
1610.21	3384.93		1578.84	5866.94
1608.91	3384.88		1578.56	5866.47
1608.36	3384.23		1577.81	5865.04
1608.24	3383.82		1576.04	5864.17
1607.71	3383.39		1575.18	5863.07
1607.29	3382.3		1571.83	5861.28
1606.93	3381.49		1571.38	5859.11
1606.55	3380.39		1569.67	5857.4
1605.72	3378.7		1568.1	5855.61
1603.62	3372.91		1568.08	5850.08
1603.62	3370.63		1567.77	5841.16
1603.54	3368.61		1566.13	5840.65
1602.72	3367.8		1565.3	5839.77
1602.39	3367.57		1561.56	5839.44
1601.87	3365.24		1561.37	5837.85
1601.4	3364.48		1561.33	5833.37
1601.04	3363.14		1560.85	5830.28
1600.77	3363.12		1560.09	5828.88
1598.06	3359.98		1560.01	5824.15
1597.74	3359.49		1559.96	5818.67
1597.25	3355.21		1556.65	5815.37
1594.75	3354.31		1555.53	5814.42
1594.39	3353.94		1554.24	5810.98
1594.19	3345.94		1552.8	5810.56
1593.96	3345.1		1552.02	5803.19
1593.79	3344.91		1550.31	5802.35
1592.85	3344.84		1549.43	5801.94
1592.14	3343.61		1548.47	5800.06
1592.13	3342.41		1547.66	5800.05
1591.16	3342		1547.46	5797.21
1589.95	3339.35		1546.54	5795.08
1589.34	3339.32		1546.39	5791.7
1589.21	3335.28		1545.61	5786.18
1587.31	3335.24		1545.4	5779.99
1587.22	3334.61		1544.52	5778.68
1586.56	3332.16		1542.65	5772.08
1586.37	3329.97		1542.59	5771.19
1586.19	3326.72		1542.56	5769.12
1584.54	3321.82		1542.09	5767.19
1582.87	3321.35		1538.42	5763.55
1582.41	3320.34		1537.75	5762.92
1582.12	3320.29		1537.16	5762.01
1579.14	3319.92		1536.69	5758.67
1578.36	3319.3		1535.59	5758.63
1577.21	3317.78		1535.55	5754.99
1577	3316.62		1535.27	5753.27
1576.15	3314.88		1534.84	5751.56
1573.59	3312.25		1534.41	5750.91
1573.49	3311.57		1533.65	5746.7
1572.72	3311.03		1533.62	5746.32
1571.38	3310.59		1532.82	5745.38
1570.58	3308.45		1532	5743.44
1569.94	3308.04		1531.9	5742.13
1568.66	3305.83		1531.81	5741.65
1568.58	3304.97		1530.67	5740.4
1566.61	3304.77		1530.24	5736.09
1565.53	3304.61		1528.54	5735.5
1564.55	3303.49		1528.37	5735.19
1564.06	3302.22		1528.37	5724.92
1561.03	3300.76		1528.24	5723.35
1560.85	3300.12		1527.57	5722.2
1560.6	3296.58		1526.69	5720.63
1560.04	3292.83		1526.11	5718.89
1558.97	3290.09		1524.31	5717.48
1557.18	3286.35		1523.61	5717.07
1556.73	3285.18		1521.37	5714.6
1555.94	3283.94		1520.85	5714.59
1553.15	3283.93		1519.06	5714.27
1551.54	3279.95		1518.69	5712.26
1551.19	3279.36		1517.16	5707.02
1551.09	3278.71		1516.17	5704.64
1546.13	3277.51		1515.31	5702.48
1545.3	3277.19		1514.95	5699.2
1544.94	3272.75		1513.69	5699.19
1544.19	3270.22		1513.18	5699.14
1543.54	3269.89		1512.71	5698.34
1542.42	3269		1511.49	5697.39
1542.22	3268.24		1510.66	5695.56
1541.91	3268.09		1509.42	5691.77
1540.59	3267.47		1509.31	5690.9
1538.52	3266.7		1508.13	5684.59
1537.48	3264.97		1508.07	5683.71
1536.81	3263.3		1507.38	5681.56
1536.75	3263.15		1505.32	5676.06
1535.66	3262.94		1505.2	5674.29
1535.39	3262.9		1504.17	5673.08
1535.15	3261.56		1503.42	5669.9
1534.85	3256.24		1502.66	5669.65
1533.29	3253.36		1500.68	5668.75
1532.43	3252.24		1500.61	5665.59
1531.23	3250.53		1500.52	5663.53
1529.52	3249.65		1499.16	5663.43
1529.12	3249.39		1498.26	5662.89
1528	3248.14		1498.23	5661.12
1525.37	3247.74		1497.64	5660.17
1524.33	3245.93		1496.99	5658.18
1523.48	3242.87		1496.69	5648.18
1522.25	3242.54		1496.06	5645.99
1522.23	3240.91		1494.99	5644.12
1522.2	3240.13		1494.24	5644.04
1521.67	3239.96		1493.64	5642.87
1521.36	3239.4		1493.06	5642.79
1520.51	3237.91		1493.02	5641.27
1519.3	3236.81		1492.93	5639.69
1519.19	3235.94		1491.83	5637.97
1518.91	3232.33		1488.18	5637.08
1518.8	3230.29		1487.39	5634.94
1518.14	3229.75		1486.69	5634.46
1517.64	3225.49		1485.3	5631.77
1516.94	3225.44		1484.76	5630.48
1515.67	3224.94		1484.44	5628.92
1514.04	3224.16		1483.96	5628.45
1511.79	3223.91		1483.37	5625.68
1511.3	3221.66		1482.09	5625.33
1510.41	3220.76		1481.2	5620.5
1508.34	3220.71		1480.49	5619.85
1507.92	3220.36		1479.44	5618.83
1506.28	3220.08		1478.73	5618.12
1505.88	3218.25		1478.35	5615.89
1505.64	3217.32		1477.94	5615.29
1502.79	3216.47		1477.43	5614.31
1502.75	3209.27		1475.85	5608.2
1500.37	3207.5		1474.38	5608.02
1499.87	3207.42		1473.61	5602.46
1499.29	3207.35		1471.47	5600.91
1498.56	3206.59		1471	5600.09
1497.82	3204.85		1469.85	5599.37
1496.67	3203.33		1468.89	5595.24
1495.19	3196.63		1468.29	5588.74
1494.77	3195.99		1467.4	5586.02
1494.09	3193.8		1466.46	5582.52
1494.07	3192.41		1466.37	5581.35
1492.89	3191.14		1464.62	5579.82
1491.05	3188.36		1463.18	5578.5
1490.31	3185.92		1462.62	5575.19
1487.44	3183.67		1458.85	5575.02
1486.79	3182.55		1458.23	5573.75
1486.53	3182.46		1458.16	5573.56
1486.19	3181.72		1456.54	5573.1
1485.85	3178.18		1456.22	5572.09
1485.37	3178.07		1455.93	5571.25
1485.12	3176.25		1455.61	5570.77
1484.79	3176.09		1455.33	5570.76
1483.16	3171.56		1455.14	5570.47
1482.42	3171.15		1454.94	5570.1
1482.32	3170.62		1453	5566.49
1482.31	3170.4		1451.92	5565.45
1481.59	3166.7		1451.43	5563.67
1481.26	3164.69		1451.01	5560.97
1480.43	3164.07		1450.84	5559.24
1479.7	3163.28		1450.17	5558.97
1479.49	3158.33		1449.26	5555.43
1476.42	3158.24		1448.84	5550.68
1474.97	3156.81		1446.39	5547.71
1474.36	3156.03		1444.57	5543.81
1473.47	3155.08		1443.62	5541.55
1473.2	3154.33		1443.06	5540.38
1470.96	3153.82		1443.03	5539.48
1467.46	3152.92		1441.84	5536.54
1467.29	3152.2		1441.03	5534.21
1466.28	3150.64		1439.58	5533.69
1463.98	3149.52		1439.54	5532
1462.86	3149.48		1437.7	5530.08
1462.76	3148.69		1437.61	5529.94
1461.33	3148.62		1437.33	5526.77
1461.26	3148.49		1437.15	5525.11
1460.25	3147.74		1435.72	5523.19
1458.14	3147.11		1435.23	5522.82
1457.75	3145.48		1433.14	5519.66
1457.14	3144.64		1432.68	5519.54
1455.93	3143.7		1432.06	5519.1
1454.5	3143.65		1429.32	5518.77
1453.49	3142.02		1427.8	5518.69
1452.56	3140.02		1427.27	5517.68
1451.04	3138.68		1427.2	5516
1450.24	3137.89		1426.94	5505.21
1449.15	3137.09		1426.21	5504.46
1447.19	3136.38		1425.67	5503.19
1446.72	3135.85		1424.5	5503.06
1446.21	3135.61		1421.93	5501.87
1445.41	3134.58		1421.33	5501.85
1444.81	3133.29		1420.93	5496.71
1444.21	3132.1		1419.84	5495.54
1444.19	3130.49		1416.35	5493.59
1443.4	3129.58		1416.31	5491.74
1443.19	3129.53		1412.64	5491.09
1442.69	3129.45		1407.64	5489.53
1442.21	3127.31		1407.46	5488.81
1441.58	3126.72		1406.35	5485.55
1440.61	3122.63		1403.52	5484.16
1440.19	3120.86		1402.78	5483.96
1438.05	3120.85		1402.43	5482.74
1435.75	3119.23		1402.29	5476.95
1435.07	3119.14		1402.2	5475.69
1430.98	3118.76		1400.39	5475.43
1430.27	3118.45		1399.5	5474.91
1430.1	3118.07		1398.19	5473.63
1428.8	3115.29		1396.44	5471.25
1427.41	3114.86		1395.54	5470.21
1426.86	3114.41		1395.5	5467.87
1425.96	3114.32		1395.1	5467.26
1425.26	3111.47		1394.2	5465.23
1423.53	3110.93		1394.17	5463.98
1419.22	3109.45		1393.44	5462.49
1418.91	3108.79		1392.8	5461.35
1418.44	3106.33		1392.51	5458.6
1417.28	3103.33		1392.23	5456.31
1415.09	3100.45		1390.51	5454.71
1414.81	3099.5		1390.43	5452.2
1414.41	3096.75		1389.27	5451.09
1413.98	3096.63		1388.42	5448.44
1413.91	3095.64		1388.36	5448.31
1411.06	3095.56		1388.27	5447.99
1408.91	3092.44		1388	5443.14
1408.34	3092.44		1387.58	5442.2
1408.14	3091.86		1386.43	5441.06
1407.67	3091.8		1386.37	5440.97
1403.73	3090.64		1386.37	5440.35
1403.09	3089.88		1385.88	5439.79
1402.49	3087.8		1385.76	5436.36
1401	3087.58		1385.65	5436.29
1400.33	3085.67		1385.08	5435.21
1399.07	3085.02		1384.74	5434.74
1398.47	3084.65		1384.04	5433.81
1397.99	3084.27		1383.21	5429.46
1396.95	3082.86		1382.61	5427.3
1396.14	3082.17		1382.1	5426.53
1395.75	3081.24		1381.46	5426.09
1394.79	3081.13		1379.27	5425.39
1394.73	3080.45		1375.91	5425.31
1393.94	3080.18		1375.44	5419.03
1393.57	3078.38		1375.35	5416.64
1393.46	3078.28		1372.02	5414.91
1393.37	3077.52		1371.94	5413.5
1392.19	3076.51		1371.43	5407.94
1391.06	3076.35		1371.26	5406.91
1390.25	3074.44		1369.95	5406.48
1389.91	3072.82		1369.75	5399.6
1389.36	3072.59		1369.56	5399.4
1388.97	3072.11		1369.39	5396.36
1388.54	3071.88		1369.34	5391.62
1386.33	3070.77		1369.31	5389.61
1386.33	3070.17		1368.36	5387.03
1386.28	3069.41		1368.04	5383.24
1384.45	3069.05		1367.83	5382.49
1383.53	3068.78		1367.15	5381.64
1382.74	3068.09		1366.88	5380.69
1382.31	3065.75		1366.65	5378.56
1381.38	3063.29		1365.94	5378.29
1381.28	3063.21		1364.77	5377.22
1381.22	3061.59		1364.67	5373.92
1380.96	3061.56		1364.49	5372.83
1379.07	3060.03		1363.09	5370.94
1378.81	3057.74		1363.08	5369.66
1377.88	3057.16		1362.69	5367.82
1377.7	3056.73		1360.68	5367.56
1377.39	3055.55		1358.53	5363.46
1377.33	3053.61		1358.09	5361.65
1376.76	3052.25		1357.64	5356.18
1374.72	3049.52		1356.22	5355.96
1373.08	3049.48		1356.18	5355.52
1372.95	3048.45		1355.97	5353.55
1370.15	3047.69		1354.41	5353.07
1368.72	3045.75		1353.27	5352.74
1368.54	3044.58		1349.94	5350.28
1368.35	3042.36		1349.3	5349.27
1365.77	3040.26		1349.23	5348.77
1365.67	3039.3		1347.77	5343.55
1364.51	3034.24		1345.76	5342.55
1364.4	3033		1343.01	5342.2
1363.24	3025.76		1342.9	5341.57
1362.77	3025.7		1340.65	5341.56
1362.49	3025.57		1340.33	5340.77
1361.97	3024.19		1340.28	5340.71
1359.04	3023.41		1337.9	5340.1
1358.59	3021.78		1337.68	5340
1357.42	3020.54		1337.3	5338.23
1354.77	3020.17		1336.44	5337.65
1354.62	3020.1		1334.31	5337.34
1353.89	3018.71		1332.22	5336.38
1353.83	3018.02		1329.1	5334.42
1353.05	3016.69		1328.59	5332.84
1351.61	3015.61		1328.42	5332.6
1351.41	3015.59		1326.89	5331.54
1349.99	3012.53		1325.51	5324.03
1348.65	3012.52		1324.54	5319.74
1348.43	3008.14		1324.07	5319.68
1348.36	3008.13		1321.72	5318.54
1347.61	3005.72		1320.4	5316.23
1346.92	3005.38		1320.1	5316.01
1345.61	3004.51		1319.09	5314.1
1344.47	3001.89		1316.05	5313.83
1341.72	3000.39		1314.51	5312.46
1340.1	2998.05		1314.36	5312.25
1340.01	2997.53		1314.28	5311.36
1335.65	2996.35		1314.2	5308.77
1334.64	2995.63		1311.89	5308.18
1334.52	2995.03		1311.04	5305.36
1333.62	2993.34		1311.03	5304.27
1332.8	2992.95		1308.01	5299.34
1331.22	2992.95		1307.35	5298.82
1330.2	2991.96		1306.15	5294.89
1329.49	2991.21		1306.07	5292.32
1329.34	2989.36		1304.11	5292.05
1329.19	2987.05		1303.28	5290.66
1327.79	2985.57		1302.72	5288.54
1325.87	2984.71		1302.06	5287.46
1325.19	2983.18		1301.71	5287.23
1325.04	2982.76		1300.58	5284.48
1323.63	2982.29		1300.45	5283.4
1323.31	2980.1		1300	5281.16
1320.94	2979.21		1299.1	5280.58
1320.91	2977.56		1298.05	5279.61
1320.52	2976.59		1297.79	5277.26
1319.3	2975.16		1297.23	5276.72
1318.52	2974.06		1296.43	5274.56
1317.85	2973.77		1296.04	5273.19
1317.75	2973.23		1294.84	5272.76
1316.41	2971.64		1294.79	5269.7
1314.59	2971.54		1294.04	5267.78
1314.42	2968		1291.47	5264.69
1313.57	2967.08		1291.15	5259.9
1313.21	2965.94		1289.22	5256.25
1312.29	2965.43		1288.07	5253.93
1309.57	2964.82		1285.99	5252.45
1308.62	2963.85		1285.71	5249.66
1307.53	2963.59		1283.14	5249.12
1306.68	2962.62		1281.74	5247.14
1306.61	2962.45		1280.51	5244.67
1305.41	2959.22		1276.65	5241.04
1305.37	2955.76		1276.41	5240.14
1303.78	2954.77		1276.3	5239.96
1303.11	2954.71		1275.34	5239.15
1303.03	2954		1275.16	5237.82
1301.92	2952.49		1273.73	5237.65
1301.65	2952.42		1273.24	5235.88
1298.93	2952.4		1273.01	5235.67
1298.88	2950.74		1272.96	5235.58
1298.7	2950.66		1272.79	5235.21
1298.59	2950.36		1272.51	5234.24
1298.11	2949.06		1272.41	5233.75
1296.37	2949.03		1272.41	5228.42
1296.34	2948.85		1272.11	5227.49
1294.85	2948.78		1270.01	5227.34
1294.75	2947.3		1269.58	5223.8
1293.33	2946.42		1267.09	5223.48
1293.09	2945.7		1267.05	5219.86
1293.04	2944.81		1266.01	5219.28
1292.79	2944.8		1264.9	5218.16
1291.72	2943.42		1264.48	5217.82
1291.57	2942.51		1264.18	5215.38
1291.56	2941.51		1263.08	5214.41
1291.26	2940.38		1261.35	5214.3
1290.65	2939.55		1260.73	5213.67
1290.52	2939.48		1260.55	5212.78
1290.29	2939.1		1260.23	5209.72
1290.22	2935.53		1259.63	5207.18
1288.7	2934.33		1259.39	5204.19
1288.01	2933.95		1257.16	5203.98
1287.41	2933.8		1255.31	5200.88
1287.14	2933.57		1255	5197.53
1286.51	2933.17		1254.63	5197.44
1286.45	2932.55		1253.68	5194.67
1286.37	2929.54		1251.43	5194.57
1286.1	2929.34		1251.39	5192.56
1284.45	2927.51		1250.28	5192.49
1284.42	2926.3		1246.82	5191.61
1281.65	2924.75		1245.65	5191.03
1280.12	2922.34		1245.33	5190.41
1278.93	2920.98		1244.48	5189.36
1278.89	2919.78		1239.13	5189
1278.71	2916.13		1238.51	5188.84
1278.53	2914.93		1236.21	5187.41
1278.33	2913.93		1233.27	5186.81
1277.95	2913.53		1233.2	5186.72
1276.38	2912.75		1230.86	5183.69
1276.29	2909.75		1230.44	5183.44
1275.47	2909.67		1229.86	5182.77
1275.01	2907.65		1227.16	5182.63
1275	2907.08		1226.62	5182.23
1274.87	2906.18		1225.38	5182.01
1274.4	2905.26		1223.82	5178.29
1273.86	2903.77		1223.14	5173.73
1273.35	2902.43		1223.02	5171.95
1271.22	2900.18		1222.49	5169.97
1269.06	2900.07		1221.04	5169.89
1267.35	2899.5		1220.6	5166.82
1266.25	2898.49		1219.35	5166.46
1265.69	2897.56		1218.1	5164.58
1264.92	2897.08		1217.73	5163.33
1263.95	2896.74		1217.25	5161.35
1263.93	2895.36		1216.74	5158.81
1263.4	2894.06		1212.57	5156.51
1255.96	2893.1		1212.44	5155.95
1255.69	2888.79		1212.41	5152.27
1252.9	2888.68		1212.22	5150.62
1250.8	2888.13		1211.1	5148.66
1248.84	2887.61		1210.89	5144.99
1248.74	2887.42		1210.61	5144.47
1246.91	2884.19		1208.76	5143.59
1245.1	2883.67		1208.64	5141.85
1243.89	2882.5		1208.5	5137.64
1243.76	2881.38		1205.55	5137.54
1242.96	2880.76		1204.81	5137.34
1241.43	2879.55		1204.74	5136.82
1241	2876		1204.47	5136.56
1239.64	2874.24		1204.45	5135.36
1239.63	2872.58		1203.87	5134.3
1238.13	2872.57		1202.81	5130.08
1237.89	2872.27		1202.75	5130.02
1237.44	2872.12		1202.57	5128.98
1236.49	2872.08		1202	5128.34
1234.65	2867.79		1201.14	5126.99
1230.76	2866.21		1200.95	5126.98
1229.17	2864.21		1200.75	5126.37
1228.78	2863.66		1199.71	5124.82
1228.6	2861.24		1199.65	5121.86
1228.45	2861.14		1199.51	5120.18
1228.13	2860.9		1198.68	5119.78
1226.13	2858.8		1198.13	5119.27
1225.27	2856.74		1197.08	5118.38
1224.9	2856.33		1192.19	5117.93
1224.66	2852.51		1191.36	5115.9
1224.48	2850.09		1189.07	5114.42
1223.82	2849.72		1188.32	5113.69
1221.84	2848.99		1187.51	5111.4
1220.95	2846.79		1185.95	5109.92
1220.91	2846.15		1184.98	5108.98
1220.58	2846.13		1184.75	5107.88
1220.35	2845.43		1184.57	5106.77
1218.52	2844.79		1183.43	5104.86
1218.07	2842.48		1183.38	5101.99
1217.23	2841.97		1182.89	5101.91
1216.34	2841.6		1180.52	5099.95
1216.13	2841.31		1180.05	5097.08
1215.99	2841.2		1179.73	5096.55
1214.04	2840.03		1179.43	5096.13
1213.57	2836.72		1179.02	5095.48
1212.02	2835.08		1177.12	5094.98
1211.49	2835.07		1177	5094.43
1209.27	2834.68		1176.95	5094.15
1208.95	2830.32		1176.48	5093.56
1208.15	2829.07		1176.05	5093.09
1208	2827.67		1175.53	5092.47
1207.32	2827.17		1174.49	5091.51
1207.28	2826.85		1174.38	5087.56
1206.73	2826.72		1173.89	5086.82
1206.16	2825.88		1173.42	5086.64
1204.88	2825.01		1171.41	5084.89
1204.77	2823.8		1170.23	5083.01
1203.53	2823.04		1168.43	5082.27
1203.01	2822.08		1167.8	5081.45
1202.19	2821.49		1167.26	5080.87
1202.12	2819.08		1166.92	5080.33
1198.66	2817.97		1165.15	5078.6
1196.99	2816.31		1164.51	5078.26
1195.52	2815.59		1162.6	5077.07
1195.45	2815.4		1159.08	5074.86
1195.17	2815.3		1157.64	5072.88
1194.99	2814.87		1156.56	5070.76
1194.83	2813.61		1156.49	5069.94
1193.2	2813.35		1156.31	5069.6
1191.19	2813.18		1156.28	5069.02
1189.85	2812.7		1155.89	5067.47
1189.53	2811.47		1155.73	5067.03
1188.05	2810.36		1155.67	5064.93
1187.8	2810.13		1155.54	5064.14
1187.26	2809.24		1155	5062.29
1185.32	2809.02		1153.84	5061.11
1181.64	2805.86		1152.28	5060.54
1180.73	2805.03		1151.62	5057.39
1180.7	2803.67		1150.63	5057.39
1180.37	2803.17		1149.86	5056.28
1180.16	2802.99		1149.85	5054.47
1178.84	2801.48		1149.42	5048.02
1177.55	2800.28		1149.42	5046.49
1175.48	2799.58		1149.19	5045.44
1174.91	2798		1147.99	5043.5
1173.8	2797.94		1144.7	5042.77
1173.07	2796.96		1143.4	5041.75
1172.28	2796.34		1143.07	5040.72
1171.59	2796.07		1141.4	5040.51
1171.47	2795.51		1140.73	5040.29
1169.21	2795.47		1140.01	5038.23
1169.2	2795.31		1138.96	5037.88
1168.56	2793.38		1137.74	5035.07
1166.92	2791.93		1137.54	5033.97
1164.16	2790.19		1137.15	5032.35
1163.95	2789.81		1137.13	5029.33
1163.73	2789.12		1135.49	5028.68
1163.48	2788.98		1135.35	5026.65
1162.68	2787.4		1132.52	5026.58
1162.04	2786.93		1131.93	5025.51
1160.53	2784.56		1130.2	5025.45
1159.59	2783.74		1128.76	5024.58
1158.53	2783.58		1127.99	5023.74
1157.71	2783.28		1124.65	5019.81
1157.07	2782.35		1123.85	5019.23
1156.23	2781.19		1123.19	5015.69
1155.79	2774.8		1121.38	5014.86
1155.32	2773.7		1119.58	5013.82
1154.99	2773.12		1119.1	5013.09
1154.33	2772.11		1116.42	5011.82
1154.26	2770.55		1115.81	5009.67
1154.17	2769.29		1115.06	5008.81
1151.06	2769.23		1114.3	5008.75
1150.13	2768.85		1113.37	5007.05
1149.87	2768.72		1110.93	5003.21
1149.79	2767.91		1110.8	5003.16
1149.75	2767.65		1110.58	5002.73
1148.62	2767.01		1110.48	5000.69
1148.03	2766.66		1110.1	5000.18
1147.25	2765.12		1109.49	4999.24
1140.92	2765.1		1106.35	4997.99
1139.98	2763.88		1105.97	4997.82
1138.96	2763.8		1105.78	4996.59
1138.54	2762.81		1103.58	4996.4
1136.14	2761.95		1102.99	4996.29
1136.13	2761.78		1102.34	4994.71
1136	2760.01		1102.15	4994.61
1135.32	2759.67		1101.01	4994.39
1134.95	2758.97		1100.13	4993.65
1134.79	2758.53		1098.39	4992.02
1130.84	2755.83		1095.95	4989.27
1130.36	2754.83		1094.84	4988.17
1130.24	2753.85		1092.85	4986.56
1129.24	2752.49		1091.86	4986.46
1128.85	2752.27		1091	4983.57
1127.72	2751.17		1090.11	4983.18
1127.35	2750.86		1089.56	4982.88
1126.71	2750.43		1088.45	4982.62
1125.12	2749.86		1085.15	4982.32
1124.68	2749.54		1083.62	4980.91
1124.34	2748.34		1082.35	4980.62
1124.28	2747.92		1078.38	4977.74
1124.21	2747.08		1078.03	4975.45
1123.46	2746.35		1077.32	4973.95
1120.72	2744.77		1077.25	4973.58
1120.46	2744.66		1077.06	4969.98
1120.17	2743.25		1075.81	4969.07
1119.08	2742.4		1075.59	4968.68
1119.05	2741.04		1074.45	4964.32
1119.05	2739.95		1074.18	4956.74
1117.37	2739.18		1073.47	4955.17
1116.69	2737.49		1071.64	4954.48
1116.31	2736.02		1070.52	4954.34
1114.34	2735.71		1070.12	4952.85
1114.08	2734.45		1069.82	4951.53
1113.87	2734.38		1069.51	4951.5
1113.09	2733.39		1069.16	4949.23
1111.17	2733.24		1065.88	4948.12
1110.81	2732.85		1064.25	4947.85
1110.06	2732.25		1063.82	4946.92
1109.75	2731.67		1063.17	4945.86
1108.9	2731.57		1062.8	4945.73
1108.69	2729.99		1061.98	4945.36
1107.59	2729.78		1061.34	4943.99
1106.61	2729.73		1058.95	4943.29
1104.85	2726.49		1058.66	4941.8
1104.83	2724.18		1057.78	4940.49
1104.43	2723.04		1056.8	4940.35
1103.64	2720.71		1056.15	4939.82
1103.16	2718.62		1054.49	4939.14
1102.79	2718.57		1053.65	4938.85
1102.1	2718.52		1052.09	4937.55
1100.99	2717.62		1051.34	4937.26
1099.98	2715.69		1050.17	4936.51
1099.69	2714.97		1050.14	4936.35
1099.18	2714.54		1049.38	4935.99
1098.2	2714.22		1049.22	4934.99
1097.05	2713.74		1047.43	4933.18
1096.77	2713.12		1047.21	4928.59
1096.69	2711.78		1046.28	4927.53
1095.15	2709.56		1045.87	4927.27
1094.88	2709.5		1045.17	4926.47
1094.63	2709.42		1045.11	4925.7
1093.85	2709.36		1044.13	4925.15
1093.41	2708.05		1043.12	4924.94
1092.55	2706.09		1042.88	4924.52
1091.22	2705.67		1041.98	4923.42
1086.79	2701.77		1041.24	4923.35
1086.75	2701.14		1041.14	4922.33
1085.94	2700.74		1040.4	4922.07
1085.61	2699.55		1040.07	4921.71
1085.45	2699.14		1040.01	4915.99
1085.25	2698.39		1039.61	4915.5
1085.07	2698.26		1038.26	4914.86
1084.92	2697.9		1037.87	4914.3
1084.24	2697.56		1037	4913.83
1081.23	2697.48		1035.86	4911.55
1080.73	2697.08		1035.56	4911.4
1079.87	2695.91		1034.41	4911.28
1079.83	2695.24		1034.35	4909.83
1078.29	2694.76		1033.28	4906.72
1077.93	2694.68		1032.89	4905.11
1076.98	2691.74		1031.28	4903.88
1076.35	2690.99		1030.87	4902.81
1075.9	2690.82		1030.79	4901.81
1075.39	2690.72		1030.07	4899.98
1074.71	2688.96		1029.66	4898.56
1074.67	2688.13		1029.36	4898.31
1073.28	2688.09		1028.9	4897.41
1072.01	2687.25		1028.56	4896.19
1069.96	2683.94		1028.17	4894.27
1069.37	2683.59		1027.69	4894.03
1067.04	2683.54		1027.57	4893.82
1065.72	2683.13		1027.29	4893.8
1064.81	2681.91		1025.35	4890.3
1064.22	2681.87		1025.13	4889.98
1063.01	2681.56		1024.23	4889.87
1062.42	2678.58		1023.88	4888.18
1060.02	2678.26		1023.62	4885.5
1057.47	2677.92		1023.24	4884.1
1056.63	2677.89		1022.68	4883.84
1056.58	2676.62		1022.4	4881.98
1053.08	2676.49		1022.26	4881.02
1052.3	2676.21		1020.43	4876.73
1051.89	2675.89		1019.04	4876.27
1051.83	2674.04		1017.31	4875.42
1051.79	2673.91		1017.03	4873.56
1046.6	2673.87		1016.21	4872.78
1046.51	2671.8		1014.77	4872.46
1043.5	2670.82		1012.63	4870.38
1042.45	2668.33		1011.54	4868.56
1041.19	2668.03		1011.07	4868
1041.02	2667.98		1010.34	4864.67
1041.01	2667.86		1007.51	4862.95
1038.38	2667.38		1007.28	4862.63
1037.83	2666.45		1006.92	4862.57
1037.83	2666.16		1006.35	4860.75
1037.42	2666.07		1005.23	4858.29
1036.81	2665.57		1004.46	4857.73
1036.12	2665.18		1004.38	4851.89
1035.36	2664.66		1002.36	4851.09
1034.59	2664.32		1002.26	4850.85
1033.94	2664.01		1000.22	4850.08
1033.63	2663.37		1000.14	4847.98
1031.39	2662.99		999.247	4846.38
1028.44	2662.13		998.927	4843.58
1027.9	2661.34		997.781	4842.49
1027.74	2661.13		996.878	4842.48
1025.71	2660.66		996.43	4842.06
1024.74	2660.19		995.827	4841.83
1024.31	2659.64		994.912	4841.56
1024.09	2658.82		994.487	4840.99
1024.01	2656.46		993.61	4839.6
1023.97	2655.28		993.176	4838.95
1023.81	2654.58		992.958	4836.44
1023.08	2654.44		991.103	4835.71
1021.63	2654.08		990.249	4835.51
1019.63	2652.93		989.717	4832.77
1019.11	2652.88		988.183	4831.54
1018.29	2650.98		987.68	4831.3
1018.13	2650.7		985.602	4829.87
1017.7	2650.66		983.341	4827.11
1016.26	2646.88		983.1	4826.79
1015.49	2643.39		982.936	4826.27
1014.93	2641.74		982.728	4824.08
1013.38	2640.08		980.414	4822.78
1013.34	2639.41		979.426	4821.62
1013.28	2638.7		978.757	4820.98
1012.86	2636.44		978.113	4819.56
1011.17	2635.65		976.232	4817.55
1010.06	2633.87		974.664	4815.11
1008.48	2632.75		974.507	4814.74
1008.43	2632.64		973.603	4811.97
1008.03	2632.6		973.241	4811.55
1007.54	2631.61		972.082	4811.4
1007.37	2630.2		970.841	4808.34
1007.12	2630.09		969.217	4806.89
1006.39	2629.04		969.128	4806.13
1006.09	2628.46		967.829	4805.42
1005.87	2625.8		966.739	4805.08
1004.15	2625.04		965.996	4805.03
1004.1	2624.95		964.327	4804.88
1000.56	2624.15		963.185	4804.55
999.326	2623.29		960.327	4803.26
999.24	2622.45		960.152	4799.65
998.506	2621.87		960.001	4795.76
998.082	2621.55		959.286	4793.22
996.563	2620.97		959.138	4791.41
995.369	2620.93		956.988	4790.65
995.309	2620.04		956.883	4789.74
995.196	2618.57		955.758	4788.26
994.261	2618.49		955.548	4788.18
993.622	2618.41		955.104	4786.9
991.973	2618.22		954.886	4786.74
990.602	2618		954.379	4785.66
990.598	2616.93		954.239	4783.16
990.267	2616.08		954.207	4782.98
987.272	2615.55		953.38	4782.43
987.158	2613.45		952.38	4781.18
986.655	2612.3		950.429	4780.74
985.616	2612.25		949.554	4779.15
984.823	2611.02		948.931	4778.49
984.649	2610.94		948.744	4778.27
984.433	2610.91		948.549	4774.19
983.587	2610.91		947.737	4771.14
983.042	2610.11		947.289	4770.53
982.978	2608.98		946.292	4770.4
981.949	2608.77		946.225	4770.09
981.212	2607.45		946.011	4768.25
980.676	2606.96		944.998	4764.57
980.573	2604.65		944.8	4764.12
980.572	2604.35		943.276	4762.53
980.129	2603.73		943.265	4761.38
978.547	2601.72		939.723	4760.01
978.521	2600.53		939.609	4757.64
978.52	2599.35		937.152	4757.38
978.061	2597.17		935.917	4757.11
977.323	2596.36		933.78	4756.34
976.562	2595.9		933.112	4756.1
975.572	2595.7		931.933	4756.04
974.835	2595.63		929.978	4754.6
973.67	2595.15		929.633	4752.75
973.565	2594.79		929.42	4752.26
970.049	2593.25		929.269	4752.23
968.522	2592.75		926.396	4752.05
968.481	2592.61		926.385	4751.45
968.193	2591.56		926.167	4750.44
968.109	2591.04		921.979	4749.34
967.661	2590.88		921.862	4748.08
967.318	2590.41		921.639	4747.42
967.091	2590.12		921.093	4747.35
967.019	2588.39		917.506	4746.79
964.08	2588.2		916.821	4746.77
963.885	2587.59		916.112	4745.55
963.02	2585.76		914.743	4744.01
961.67	2585.19		914.702	4743.33
960.711	2583.58		912.675	4742.9
960.323	2583.53		912.126	4740.98
960.277	2582.42		911.558	4740.96
959.872	2582.32		909.76	4740.96
958.21	2581.57		909.241	4739.51
957.307	2581.57		908.248	4739.46
956.376	2580.7		906.323	4739.31
954.352	2580.09		905.991	4738.38
954.09	2579.51		903.487	4737.06
953.736	2578.61		902.429	4736.44
952.679	2578.58		901.48	4735.32
951.747	2578.08		901.169	4734.49
950.628	2577.89		899.279	4733.57
950.232	2576.92		897.648	4732.31
948.773	2576.08		897.646	4729.23
948.607	2575.05		897.146	4729.08
947.991	2572.99		896.142	4728.52
947.17	2572.16		894.823	4728.07
945.915	2572.04		893.633	4726.63
942.574	2569.99		892.87	4726.39
940.085	2569.14		891.906	4725.18
939.489	2568.66		889.312	4724.77
938.756	2568.49		889.238	4721.63
938.579	2567.63		888.481	4718.62
937.147	2567.49		887.985	4717.84
936.156	2566.73		887.18	4716.39
935.93	2566.68		886.354	4714.76
935.788	2565.96		885.462	4712.91
934.946	2565		885.161	4711.57
934.075	2564.87		885.038	4710.99
930.795	2564.51		884.28	4710.94
930.455	2564.2		883.386	4710.92
930.44	2563.35		883.151	4708.58
930.383	2562.84		882.373	4708.15
930.125	2561.45		879.063	4707.97
928.662	2561.28		877.991	4706.46
927.179	2560.39		877.604	4706.06
925.774	2559.99		876.769	4705.37
924.916	2559.75		875.047	4704.61
924.309	2559.52		874.2	4704.45
918.698	2559.51		874.069	4702.79
918.684	2558.35		869.952	4702.73
917.437	2557.24		869.423	4701.55
916.521	2555.68		868.582	4700.61
915.161	2555.3		868.319	4698.05
914.641	2554.32		868.174	4697.39
914.457	2552.59		867.48	4696.76
914.375	2552.37		865.798	4695.67
914.319	2552.09		865.034	4694.83
914.134	2551.19		864.812	4691.22
913.922	2551.16		864.475	4689.95
913.523	2547.97		863.508	4688.97
913.399	2544.95		863.305	4686.38
912.483	2544.12		861.693	4686.03
912.051	2544.08		860.552	4685.8
911.13	2544.01		859.313	4685.47
908.089	2543.96		858.515	4683.7
907.906	2543.82		855.536	4682.9
907.072	2543.14		854.7	4681.1
906.468	2542.43		854.331	4680.92
905.868	2541.99		852.438	4680.14
905.344	2541.93		852.087	4676.6
903.373	2540.99		851.27	4676.5
900.804	2540.58		849.545	4675.57
900.663	2539.14		848.648	4675.45
899.788	2538.68		848.264	4675.02
899.409	2538.47		846.953	4666.93
899.224	2538.45		846.222	4665.46
898.734	2538.39		845	4658.19
897.437	2538.04		844.955	4657.68
896.135	2537.94		842.153	4653.84
896.038	2536.87		841.656	4652.18
894.8	2536.29		840.396	4652.11
893.167	2536.19		840.16	4651.88
892.363	2536.12		839.702	4648.47
890.714	2533.02		838.452	4647.64
890.608	2532.75		837.929	4645.93
890.42	2532.32		837.709	4644.73
890.243	2531.97		837.127	4644.29
886.969	2531.05		836.998	4644.13
886.338	2530.71		834.277	4643.73
885.78	2530.1		833.125	4642.81
885.703	2529.61		832.484	4642.33
885.447	2529.17		832.315	4641.63
885.288	2528.52		827.254	4640.7
884.658	2525.89		826.868	4640.14
882.594	2525.71		826.842	4639.92
881.389	2524.79		824.812	4639.78
880.122	2524.74		824.437	4639.26
877.975	2524.7		823.329	4635.39
875.96	2523.92		819.501	4632.42
875.108	2523.48		818.38	4632.24
874.602	2522.68		818.295	4631.37
872.939	2522.02		817.244	4630.86
872.638	2521.18		817.008	4629.62
872.637	2520.96		815.675	4628.94
870.732	2520.22		814.637	4627.88
870.158	2519.2		813.328	4627.23
869.986	2518.16		812.985	4626.48
869.242	2518.07		811.667	4625.93
868.855	2516.87		811.418	4625.67
868.414	2516.31		811.38	4625.49
867.701	2516.16		809.655	4624.38
866.941	2516.02		807.889	4623.93
866.584	2513.38		807.807	4623.72
866.452	2511.96		806.065	4622.5
866.135	2511.5		803.438	4621.98
866.117	2511.33		803.001	4621.81
864.622	2510.55		802.605	4620.45
864.299	2510.43		802.269	4620.02
864.278	2510.34		801.698	4619.21
864.06	2510.2		801.435	4619.19
863.821	2509.84		800.518	4618.96
863.409	2509.06		799.812	4617.14
861.855	2507.96		796.656	4615.26
861.384	2507.31		795.947	4615.12
860.843	2506.22		795.819	4615.01
859.418	2505.92		795.518	4614.15
858.068	2505.89		795.334	4613.42
856.868	2505.49		793.603	4613.04
856.588	2505.43		793.57	4611.95
856.447	2504.52		792.094	4610.69
853.885	2504.48		789.415	4609.06
853.12	2504.43		785.329	4608.86
851.217	2502.11		781.457	4608.85
849.799	2501.82		781.435	4607.67
849.318	2501.09		779.278	4603.13
849.283	2500.13		775.394	4602.91
849.216	2499.78		775.051	4602.57
848.199	2499.61		774.789	4601.75
846.68	2499.28		773.689	4600.21
846.667	2498.83		771.906	4599.9
846.539	2497.79		771.031	4599.6
845.96	2497.39		770.193	4598.69
843.567	2497.04		770.146	4598.56
843.448	2496.46		768.009	4597.39
843.331	2496.41		767.347	4591.74
842.902	2495.77		765.276	4591.7
841.753	2492.04		764.289	4590.47
841.567	2491.99		763.712	4589.95
839.639	2491.71		763.278	4589.73
839.143	2491.56		762.923	4589.7
838.958	2491.53		761.077	4587.08
838.113	2491.48		760.341	4585.3
836.587	2489.27		759.586	4584.08
836.411	2488.74		759.184	4583.26
836.396	2487.92		758.394	4582.92
834.971	2487.43		757.534	4582.02
834.88	2486.05		756.356	4581.34
831.514	2485.86		755.777	4580.32
830.862	2485.28		754.39	4576.7
829.391	2484.46		752.316	4575.66
828.101	2484.14		749.587	4573.98
826.966	2482.61		749.369	4573.36
825.489	2482.1		749.369	4573.01
823.531	2482.07		747.399	4572.65
822.927	2481.68		745.875	4571.54
822.5	2481.23		744.032	4571.48
822.329	2481.07		743.3	4570.77
821.734	2480.99		740.815	4569.11
821.724	2480.62		738.953	4568.75
818.267	2479.26		737.94	4567.33
817.913	2478.96		737.876	4567.2
817.121	2477.74		737.419	4567.14
816.545	2477.08		737.048	4567.06
816.535	2476.92		737.02	4566.95
815.156	2476.51		737.017	4565.02
812.194	2475.7		734.853	4563.19
812.11	2475.37		734.475	4562.3
811.851	2474.88		733.978	4562.2
808.626	2474.63		733.944	4561.85
807.099	2473.55		733.914	4560.52
804.974	2473.36		732.425	4559.34
804.135	2471.77		730.612	4558.83
804.066	2471.69		726.314	4557.83
803.782	2471.03		726.274	4557.43
803.761	2470.61		725.738	4556.43
803.483	2469.97		725.703	4556.32
803.266	2468.66		723.867	4555.2
802.614	2464.28		721.016	4554.74
801.625	2463.69		721.004	4554.3
801.444	2462.78		720.183	4553.34
800.499	2462.75		717.315	4552.62
800.306	2462.68		716.448	4552.44
800.045	2462.44		716.071	4552.01
799.976	2461.05		714.078	4551.95
799.069	2458.29		713.307	4550.46
798.807	2458.23		712.737	4550.19
798.745	2456.57		712.656	4549.21
798.192	2455.92		709.929	4548.83
795.932	2455.14		707.589	4548.37
795.397	2455.1		705.932	4547.48
794.667	2454.71		705.074	4545.49
794.219	2454.5		704.022	4543.98
794.005	2453.95		702.715	4542.34
792.714	2453.54		698.485	4541.77
792.123	2453.5		693.803	4541.65
791.332	2452.26		693.436	4540.6
789.941	2451.98		688.048	4538.3
789.497	2451.87		685.464	4537.17
789.418	2450.95		681.877	4536.66
789.156	2449.73		681.629	4536.25
788.675	2449.57		680.941	4531.31
787.208	2448.81		678.681	4531.29
786.133	2447.84		678.542	4530.37
785.636	2447.83		677.816	4529.67
785.529	2446.87		676.523	4527.8
783.644	2446.3		675.257	4527.23
781.836	2445.08		674.489	4527.19
779.205	2444.1		673.813	4525.97
779.188	2443.14		673.705	4525.94
777.428	2442.34		673.188	4524.67
777.416	2440.44		673.016	4520.47
772.495	2440.24		668.601	4520.36
771.89	2440.12		667.687	4519.51
771.309	2439.77		667.167	4517.52
771.017	2439.32		666.953	4516.55
769.612	2438.26		666.342	4516.34
768.726	2438.26		665.043	4516.18
768.479	2437.7		664.939	4515.76
765.771	2437.46		662.535	4515.61
765.486	2435.17		662.175	4515.04
764.312	2434.31		658.822	4514.84
763.704	2434.22		655.119	4514.64
763.493	2433.33		652.564	4514.33
763.249	2432.82		651.422	4514.06
763.213	2432.22		649.513	4513.96
762.595	2432.03		649.022	4511.57
760.17	2431.95		648.176	4511.57
757.927	2431.82		647.378	4509.21
755.21	2431.25		642.816	4507.66
754.662	2429.38		640.674	4504.19
753.93	2428.17		633.456	4502.49
753.732	2427.67		631.158	4501.61
752.478	2426.29		625.355	4501.25
750.617	2425.72		622.098	4498.9
749.848	2423.04		618.383	4496.17
747.221	2422.55		617.753	4495.69
745.33	2420.72		616.782	4494.87
744.855	2420.04		616.646	4493.07
744.775	2419.79		616.067	4488.78
742.248	2418.88		611.691	4488.06
741.128	2418.59		604.813	4487.52
740.917	2418.2		602.696	4487.41
740.127	2417.21		599.473	4487.4
739.612	2416.28		597.684	4487.31
739.044	2415.45		597.329	4487.03
736.714	2412.64		595.879	4486.91
736.473	2412.27		590.05	4484.5
735.964	2412.09		578.467	4483.73
735.296	2409.89		570.807	4483.68
735	2408.38		570.056	4483.32
734.936	2407.24		563.433	4481.91
733.952	2406.72		562.13	4480.5
733.924	2404.9		559.569	4479.52
732.675	2403.58		555.335	4478.54
732.095	2403.25		553.079	4477.99
730.324	2402.36		549.819	4476.79
729.377	2402.2		549.66	4475.2
728.9	2401.12		544.722	4475.18
728.493	2400.51		540.128	4475.1
728.066	2400.45		538.513	4474.32
727.743	2399.35		536.52	4472.36
726.891	2398.66		532.656	4471.21
724.264	2397.79		530.966	4470.86
724.107	2397.7		530.275	4469.95
723.704	2397.58		525.777	4469.82
721.99	2396.62		520.849	4469.33
718.24	2396.31		520.385	4468.23
716.741	2396.07		519.404	4467.44
714.291	2395.95		516.963	4467.34
712.383	2395.64		515.41	4466.58
711.614	2393.97		512.209	4465.06
709.245	2393.74		510.909	4463.87
709.114	2392.49		497.973	4460.81
708.201	2391.8		496.592	4460.77
707.923	2391.46		493.182	4460.46
707.879	2390.28		492.279	4460.37
707.312	2389.34		492.018	4459.84
707.227	2388.64		484.445	4459.57
705.836	2388.27		483.442	4459.53
704.478	2387.83		479.04	4459.14
702.294	2387.4		473.875	4459.13
698.543	2387.05		465.205	4458.82
698.063	2386.32		465.169	4458.46
696.947	2385.66		461.133	4457.63
695.875	2385.28		457.327	4457.02
695.777	2385.05		456.847	4456.98
694.34	2385.02		456.803	4456.38
693.786	2384.48		456.708	4455.59
693.216	2384.36		454.769	4455.53
691.709	2383.35		453.438	4455.26
691.146	2382.15		444.955	4454.87
688.392	2380.83		442.656	4454.69
687.31	2380.69		437.849	4454.44
687.24	2380.25		434.295	4453.88
687.118	2379.52		422.457	4453.5
686.687	2379.01		402.296	4452.44
685.929	2378.82		401.378	4452.32
685.513	2377.8		395.452	4450.34
683.581	2377.15		391.443	4449.15
682.282	2376.32		390.59	4448.25
681.872	2376.15		381.981	4447.83
676.501	2376.1		379.974	4446.6
673.836	2374.72		377.417	4445.02
672.777	2374.36		373.767	4444.9
668.494	2373.22		370.307	4444.78
668.262	2372.98		369.902	4444.68
666.832	2371.72		368.658	4444.41
664.701	2371.1		365.232	4444.19
663.997	2371.06		361.372	4443.98
662.652	2369.46		358.576	4443.45
661.571	2367.87		355.916	4442.85
661.037	2366.48		353.909	4441.42
660.303	2365.22		339.101	4440.43
660.037	2364.94		338.003	4437.44
658.719	2364.66		337.286	4435.6
658.079	2364.09		335.6	4434.88
655.441	2364		331.938	4434.02
653.913	2363.66		327.306	4433.87
650.311	2362.82		313.812	4433.61
650.091	2362.6		301.332	4433.58
649.319	2362.27		301.247	4433.02
647.526	2361.68		299.966	4429.75
647.136	2361.33		286.761	4427.75
644.708	2360.2		271.48	4427.52
644.407	2360.17		267.831	4426.67
644.009	2358.79		266.138	4426.24
643.188	2358.22		264.507	4425.49
642.722	2357.49		263.854	4424.22
641.525	2356.17		262.196	4422.75
641.189	2355.18		255.572	4420.24
640.991	2352.88		254.948	4420.08
640.323	2352.71		254.936	4420.02
638.736	2351.94		251.539	4418.3
638.507	2351.41		250.32	4418.12
638.36	2349.87		235.269	4416.39
637.336	2349.47		--	4416.24
637.231	2348.23		--	4415.07
634.851	2347.37		--	4414.94
634.301	2347.07		--	4414.32
632.315	2345.16		--	4413.99
629.644	2342.02		--	4412.02
629.275	2341.7		--	4411.85
628.867	2341.49		--	4410.77
628.858	2340.46		--	4409.42
628.487	2340.01		--	4409.41
627.22	2339.7		--	4408.16
626.457	2339.05		--	4407.8
626.282	2338.25		--	4407.73
624.689	2338.1		--	4407.6
623.791	2336.4		--	4407.57
622.067	2336.29		--	4407.34
620.238	2335.63		--	4406.95
618.84	2334.15		--	4406.39
618.628	2334.03		--	4404.77
618.446	2333.96		--	4404.69
617.414	2333.48		--	4404.11
617.279	2331.8		--	4404.03
616.125	2330.7		--	4402.97
615.329	2330.32		--	4402.46
614.524	2330.16		--	4402.23
612.763	2329.25		--	4401.22
612.529	2328.78		--	4400.58
612.423	2328.37		--	4400.06
610.785	2328.35		--	4398.9
609.388	2328.05		--	4398.39
608.794	2327.67		--	4397.57
608.699	2325.3		--	4396.23
607.045	2324.03		--	4396.03
605.619	2323.94		--	4395.93
605.039	2323.61		--	4395.23
603.769	2323.37		--	4394.49
602.839	2323.26		--	4389.89
602.008	2322.97		--	4389.59
601.805	2322.84		--	4387.7
601.003	2322.38		--	4385.05
600.944	2322.35		--	4385.02
599.898	2321.91		--	4384.71
599.716	2321.74		--	4384.64
598.913	2320.63		--	4384.6
597.683	2320.31		--	4383.53
596.404	2320.29		--	4382.97
595.525	2320.23		--	4380.87
595.396	2319.79		--	4380.11
591.015	2318.53		--	4377.79
586.08	2317.12		--	4376.83
585.974	2316.35		--	4376.74
585.003	2315.5		--	4376.45
584.203	2315.47		--	4375.66
584.11	2315.39		--	4375.61
581.01	2315.18		--	4375.03
579.597	2314.98		--	4374.24
578.862	2314.98		--	4372.78
578.354	2314.3		--	4372.08
577.814	2313.87		--	4371.76
577.793	2313.84		--	4371.18
576.848	2313.73		--	4370.63
575.906	2312.92		--	4370.23
575.672	2312.9		--	4369.69
575.288	2312.68		--	4369.35
573.911	2311.93		--	4365.98
570.79	2311.16		--	4365.81
570.234	2310.94		--	4365.8
569.543	2310.54		--	4365.45
569.085	2310.32		--	4364.89
567.98	2310.26		--	4364.73
567.958	2310.23		--	4364.52
566.123	2310.2		--	4364.35
564.87	2308.21		--	4363.33
564.26	2306.83		--	4362.22
564.237	2306.78		--	4362
563.385	2304.19		--	4361.58
561.579	2303.5		--	4361.31
560.81	2303.25		--	4360.19
560.63	2302.66		--	4359.94
560.175	2302.59		--	4359.26
558.294	2302.26		--	4357.75
555.335	2301.94		--	4357.12
553.191	2301.93		--	4357.03
552.126	2299.4		--	4356.95
551.438	2298.34		--	4355.87
550.281	2298.2		--	4353.57
549.867	2298.02		--	4352.72
546.787	2297.72		--	4352.62
546.214	2297.04		--	4352.32
545.926	2296.68		--	4351.32
545.588	2296.45		--	4350.6
545.198	2296.34		--	4350.5
544.044	2295.49		--	4349.7
540.492	2295.24		--	4348.58
539.265	2295.12		--	4348.07
536.954	2294.5		--	4346.75
535.959	2293.62		--	4346.45
534.953	2293.37		--	4344.58
534.349	2292.35		--	4341.09
534.164	2291.84		--	4340.32
533.082	2291.3		--	4339.09
532.935	2291.05		--	4338.92
532.627	2290.85		--	4338.66
530.88	2290.51		--	4338.23
530.646	2289.3		--	4338.12
530.344	2289.16		--	4337.56
530.102	2288.91		--	4337.29
529.942	2287.51		--	4334.95
529.882	2286.78		--	4334.19
526.975	2286.06		--	4333.25
526.619	2285.23		--	4329.79
526.557	2285.2		--	4328.56
526.175	2285.11		--	4328.27
525.371	2284.6		--	4327.31
524.229	2284.34		--	4326.8
523.831	2283.89		--	4326.68
522.405	2283.7		--	4326.15
521.088	2283.32		--	4325.27
520.923	2283.31		--	4325.16
519.022	2283.31		--	4325.11
518.395	2282.77		--	4323.43
518.165	2282.74		--	4323.11
516.028	2282.48		--	4322.33
515.62	2280.65		--	4321.3
515.01	2280.18		--	4319.95
514.592	2279.46		--	4318.56
513.797	2279.43		--	4318.52
512.895	2279.32		--	4318.17
512.801	2278.9		--	4317.85
512.347	2278.79		--	4317.3
512.048	2278.4		--	4316.73
511.855	2277.44		--	4314.59
509.427	2276.35		--	4314.2
509.348	2276.02		--	4314.09
509.209	2274.44		--	4314.09
507.729	2274.43		--	4312.88
507.086	2273.54		--	4312.26
506.277	2272.48		--	4312.18
505.087	2271.43		--	4311.21
504.717	2271.41		--	4309.63
503.331	2269.91		--	4309.58
501.792	2269.49		--	4309.49
501.312	2269.42		--	4309.44
501.262	2268.35		--	4308.2
500.494	2267.41		--	4307.95
498.565	2267.04		--	4307.4
497.352	2265.9		--	4307.26
497.278	2265.7		--	4306.77
496.886	2265.69		--	4306.54
496.407	2265.66		--	4305.46
492.137	2265.28		--	4304.43
491.525	2265.04		--	4303.41
489.379	2264.96		--	4303.09
488.767	2264.63		--	4302.3
488.657	2264.33		--	4302.19
488.389	2263.8		--	4301.48
487.193	2263.45		--	4300.53
486.479	2262.51		--	4299.87
485.439	2262.44		--	4299.61
481.274	2260.49		--	4298.87
480.106	2260.2		--	4297.47
478.239	2258.41		--	4297.06
478.104	2258.37		--	4297.02
477.326	2257.91		--	4296.67
477.305	2257.88		--	4296.64
477.183	2257.32		--	4296.4
476.816	2256.11		--	4296.2
476.48	2255.53		--	4295.1
476.32	2255.53		--	4294.87
476.003	2255.04		--	4294.17
474.754	2254.44		--	4293.6
474.42	2253.89		--	4293.39
469.799	2253.18		--	4292.97
469.683	2252.52		--	4291.23
467.013	2252.21		--	4289.54
466.327	2251.19		--	4288.97
464.813	2248.83		--	4288.24
464.654	2248.16		--	4287.29
464.528	2248.06		--	4285.91
462.599	2247.98		--	4285.91
462.182	2247.81		--	4285.13
461.581	2247.55		--	4282.03
461.43	2247.32		--	4280.65
460.579	2247.26		--	4280.34
460.153	2246.94		--	4280.12
458.412	2246.66		--	4279.8
456.301	2246.32		--	4279.77
455.226	2245.59		--	4279.49
454.276	2245.56		--	4278.49
454.196	2245.29		--	4277.98
452.277	2244.79		--	4277.57
448.88	2244.33		--	4277.21
448.651	2243.7		--	4277.03
448.455	2243.33		--	4276.51
446.649	2243.09		--	4276.43
446.511	2242.94		--	4276.16
445.982	2242.5		--	4275.15
443.49	2242.43		--	4274.73
442.842	2242.06		--	4269.72
442.498	2241.78		--	4268.56
[truncated: 17,342 more rows]
