# Supplementary material for: Principles of RNA recruitment to viral ribonucleoprotein condensates in a segmented dsRNA virus
Source: eLife. 2023 Jan 26;12:e68670. doi: 10.7554/eLife.68670 (PMC9925054; doi:10.7554/eLife.68670)
Supplement: Figure 2—source data 5. — N=37 (2 hpi), N=62 (4 hpi), N=51 (6 hpi). [file elife-68670-fig2-data5.xlsx]

## Sheet: Sheet1
2 hpi			4 hpi			6 hpi
Seg 3	Seg 4		Seg 3	Seg 4		Seg 3	Seg 4
0.08	0.08		0.18	0.45		0.14	0.5
0.1	0.06		0.22	0.55		0.4	0.59
0.06	0.05		0.08	0.05		0.29	0.68
0.09	0.05		0.08	0.03		0.46	0.74
0.07	0.05		0.07	0.06		0.46	0.73
0.11	0.04		0.1	0.07		0.3	0.69
0.02	0.02		0.27	0.54		0.58	0.81
0.13	0		0.1	0.04		0.47	0.83
0.05	0.04		0.48	0.78		0.4	0.82
0.09	0.06		0.19	0.57		0.38	0.84
0.03	0.02		0.22	0.56		0.35	0.8
0.04	0.02		0.28	0.64		0.44	0.79
0.05	0.05		0.11	0.11		0.43	0.77
0.05	0.08		0.09	0.09		0.22	0.79
0.06	0.08		0.33	0.62		0.29	0.74
0.04	0.05		0.27	0.54		0.24	0.8
0.16	0.14		0.09	0.06		0.26	0.76
0.06	0.05		0.24	0.61		0.43	0.73
0.03	0.06		0.03	0.04		0.27	0.66
0.07	0.1		0.05	0		0.32	0.88
0.14	0.33		0.57	0.84		0.49	0.78
0.07	0.12		0.06	0.05		0.57	0.82
0.06	0.13		0.13	0.1		0.19	0.49
0.04	0.04		0.09	0.09		0.53	0.8
0.03	0.04		0.03	0.1		0.27	0.79
0.06	0.07		0.28	0.41		0.49	0.78
0.07	0.07		0.17	0.06		0.51	0.77
0.07	0.05		0.25	0.09		0.41	0.72
0.02	0.02		0.41	0.46		0.53	0.8
0.04	0.05		0.41	0.46		0.54	0.79
0.01	0.02		0.08	0.04		0.32	0.77
0.07	0.07		0.08	0.03		0.3	0.68
0.07	0.07		0.09	0.06		0.48	0.85
0.05	0.06		0.06	0.07		0.44	0.79
0.05	0.05		0.09	0.1		0.45	0.72
0.06	0.08		0.13	0.1		0.43	0.8
0.02	0.06		0.04	0.04		0.61	0.81
			0.63	0.69		0.31	0.77
			0.12	0.07		0.38	0.71
			0.53	0.4		0.34	0.63
			0.09	0.09		0.34	0.61
			0.57	0.54		0.48	0.69
			0.45	0.65		0.51	0.72
			0.55	0.83		0.38	0.58
			0.62	0.83		0.38	0.74
			0.53	0.8		0.52	0.81
			0.4	0.52		0.5	0.72
			0.65	0.84		0.15	0.5
			0.65	0.79		0.36	0.7
			0.52	0.77		0.32	0.79
			0.17	0.09		0.66	0.77
			0.34	0.51
			0.06	0.04
			0.15	0.18
			0.1	0.24
			0.54	0.63
			0.55	0.7
			0.66	0.71
			0.38	0.45
			0.37	0.4
			0.55	0.65
			0.35	0.24
