# Supplementary material for: Principles of RNA recruitment to viral ribonucleoprotein condensates in a segmented dsRNA virus
Source: eLife. 2023 Jan 26;12:e68670. doi: 10.7554/eLife.68670 (PMC9925054; doi:10.7554/eLife.68670)
Supplement: Figure 2—source data 7. [file elife-68670-fig2-data7.xlsx]

## Sheet: Sheet1
Seg 3			Seg 4
WT	shRNA		WT	shRNA
4812.01	1704.67		8589.75	2754.86
4556.1	2974.05		8602.11	1753.59
5428.92	1896.94		12561.5	793.502
11405.4	1738.75		17951.5	1536.95
12086.3	1623.68		17745.9	990.038
12439.4	3343.02		25567.3	1015.56
15695.3	1500.1		18102.7	3047.79
5481.43	3556.23		13836.7	1651.7
15117.5	11825.1		9246.15	25176.9
10037.8	1690.39		25846.2	1889.66
8796.19	2315.85		15554.6	1322.39
10253.3	13000.9		9011.24	1415.85
9825.35	1284.35		19851.7	1177.95
1871.5	2577.76		18358.5	1764
2724.73	17978.4		16748.2	3994.07
15892.1	2713.62		13448.5	14093
10448.7	2456.1		17605	13794.2
6231.12	13939		22441.9	2294.66
4655.64	6094.97		16262.9	3392.08
6717.93	1299.1		21579.5	11426.6
1769.53	10957.6		16633.9	1357.57
2763.77	1679.32		21937.9	14218.9
2349.77	13166.2		18191.4	9258.37
5080.59	3907.83		12812.1	14176.2
20656.5	15087.1		14949.3	12937.9
11319.9	16096.3		17257.5	14759
8145.34	7720.24		20317.8	12994
5358.05	12693.5		27029.5	15144.9
14243.2	8492.32		10372.8	1303.98
7583.8	17384.8		20016.5	15417.2
5929.36	17875.4		19271	13885.3
19104.4	3158.16		19271.2	8976.77
15580.4	21675.1		14914.1	13220.3
8196.67	18456.3		17093.3	20750.4
7245.64	17452.3		15103.4	11675.2
3025.75	1680.13		18459	13992.4
13828	11575.4		27340.1	15375.7
18851.2	26210		19657.9	14837.1
19137.1	10700.4		24746.7	17889.2
9443.82	15211		14848.5	871.099
10948.5	20183.7		24337.4	2008.42
9373.56	12822.8		20934.1	13441.8
11263.3	1618.47		16595.4	10540.3
13768.9	18112.9		17703.1	1526.95
5752.43	14128.2		22890.3	14106.1
13660.5	2833.47		16409.2	14471.1
2693.78	2582.2		20083.8	15333.9
9571.11	18550.6		15777.8	26680
6093.25	15894.7		16635.4	10135.2
4558.18	15601.2		10821.4	13975.2
1912.57	16307.5		16699.6	12480.7
23617.1	21266.2		20789.7	9809.85
7301.28	8085.56		19034.3	9452.85
14759.9	11388.6		13565.3	9769.82
17102.2	15172.3		10233	15017.7
8938.23	9398.66		17774.2	1420.25
9016.83	13725.4		13562.9	9282.55
2665.31	1657.2		10557.7	11528.4
2797.67	16935		24173.6	14981.6
13543.8	1805.81		17605.4	10967.4
1972.61	9879.61		16234.2	20947.5
13668.4	17577.8		18473.6	12394.9
16098.7	1274.49		16072.6	14414.6
6759.32	29918.6		21590.2	17496.7
1722.39	1904.63		32700.8	14829.7
12932.7	15082.8		16746.6	14372.7
11293.8	1188.71		19634.4	26663.8
13548.6	23024.2		17984.3	16421.2
5740.04	1611.76		17872.2	14753.3
8570.31	15259		6066.28	12988.5
7126.78	15588		18385.5	38729.3
2619.34	1211.78		17796.4	11304.7
3213	14836.6		18820.6	8451.04
8440.27	17039		16906.5	15533.2
7546.51	13531.8		20301.2	10944.3
9777.72	20361.9		18331	14314.1
1882.72	20224.4		18740.8	15723.8
16085.9	1666.45		25744.1	17847.2
18449.9	2009.8		22629.2	13392.1
10153.3	3061.34		10197.8	14049.2
6938.42	16495.7		32048.6	5868.38
2926.08	2110.32		17096.6	14999.7
13503.7	17545		25059	17441.3
9524.21	1609.38		17737.4	12102.6
16181.3	14952.5		20141.7	13284.5
8297.98	13688.4		23390.7	15454.4
3738.96	16594.5		19877.5	5674.52
10394.3	12178.8		23292.6	12704.4
8919.2	13726.1		21759.5	16623.9
1899.47	12057.7		17466.6	12753.7
5461.73	15402.4		17088.3	10345.3
18600.4	5922		24287	13403.5
1919.5	1146.86		23298.3	1404.07
13022.9	1386.35		15371.8	16324.9
7386.89	10131.2		24086.5	13865.3
10072.6	1194.6		19501.3	13839.2
15899.8	4884.85		33227.8	14200.5
8786.72	1217.64		16809.1	1775.03
10492.9	18056.2		22039.7	1710.34
17701.1	1257.78		19282.9	4949.72
12833.4	13387.2		15700.8	153399
10965.1	17223.4		16285.9	15448.8
10351.5	19593		17784.7	15085.6
2076.33	1231.1		19469.9	1218
17154.1	7419.48		23931.5	15778.6
2761.72	12362.3		22052	16822.4
9879.19	15386		26623.3	12305.6
5681.86	17411.1		23200	1489.47
2584.03	6595.13		22408.6	15104.7
4180.22	13620.4		19402.9	16213.3
5306.24	11495		17472.4	18157.4
1821.92	8255.29		18841.5	17829.7
11270.4	14465.4		24426.8	14911.5
13774.2	1219		11681	14272.3
4130.22	13327.4		22011	15147.5
6445.03	16469.9		23830.5	16931.5
10991.9	14429.9		23348.3	15480.4
23974.5	12540.3		18210.6	15495.5
11891	20965.4		21039.9	15163
10341.3	1697.24		25706.4	9199.19
71961.8	1193.43		18509.8	18693.6
5023.44	19243.8		22235.4	10932.3
13589.9	13001.5		25121.1	14092.4
10104.3	14114		20059.1	12866.2
10827	1176.6		22926.4	17054.7
7796.05	12736.1		51030.2	14218.8
16527.5	20552.5		22066	16271.9
7745.74	6087.92		26402.5	16516.9
11866.3	9724.99		19889	17596.1
8909.88	1740.37		19341.8	15141.7
5684.02	1200.03		20201.2	17938.5
14650.9	12694		24984.1	15785.6
14265.2	1867.33		20324.5	12539.5
14666	10136.8		18014.4	19142.4
11691.1	1685.05		23659.5	19895.9
11384	19772		27494.1	13100.3
93771.3	2982.38		22496.7	15660.3
1953.26	13926.5		3511.72	15193.1
7005.01	16143.3		192815	14705
8381.35	2596.31		12743.2	16606.6
8617.57	11209.1		26063.6	1312.45
24272.2	13287.3		21628.1	17570
6131.35	20825.8		26054.8	3171.95
28397.6	15184.5		19741.9	1394.18
10890.3	1346.91		39025.4	15857.2
22475.2	1362.91		19181.3	14926.1
10105.8	17981.1		24373.7	15322.2
6627.9	12011.3		19265.6	16766.8
13971.6	19694.5		19677.3	16415.7
14361.3	2701.75		30948.8	9813.9
11125.8	10735.4		17263.9	14963.3
1912.9	15118.1		102790	16517
10230	20067.2		15486.2	14849.9
10067.5	16423.7		18412.8	15465.5
19509.4	22027		23274.5	20048.9
12849.6	16907.6		17620.9	13291.7
187218	7982.79		21433.7	1285.62
2597.69	14552.1		11664.2	15063.6
17706	11977.6		27491.6	3450.63
4706.72	9132.98		23855.7	1509.57
10920	10392.3		16573.3	12912.7
10708.1	20155.4		18364.5	15306.5
45660.8	15194.3		16146.3	16050.5
3045.95	13055.4		47896.6	24076.2
9986.01	20324		17707.5	13899.5
1990.34	12497.7		22006.6	13657.6
5229.18	12777.8		25419.2	17739.6
11535.1	13392.5		43300.2	1398.23
4318.33	15396.8		20827.3	1371.45
3170.11	18185		22377.3	19797.7
5465.69	12565.8		19432.4	18999.7
16821.2	2537.07		19258.1	1042.89
25993.7	1588.48		104264	17247.3
17415.1	18184.9		17982.5	13825.1
11897.8	15815.9		20697.6	981.921
1867.9	30233.5		27472.3	1464.97
7167.22	14484.8		31862.3	1564.51
12366.2	16445		22055.6	1566.99
1975.68	17741.1		26360.4	711.526
28187.4	1629.85		36284.8	3725.05
11141	1713.03		19166.9	733.184
9937.61	1243.79		27392.7	3426.93
12459.6	17220		13527	866.575
15035.7	2870.37		18754.4	818.457
14508.9	16579.5		52330.6	2863.49
13326	21436		23547.5	845.512
5422.56	12730.7		24755.7	1216.68
16204.4	19151.9		25031.4	681.657
11549.5	1581.48		25587.8	3725.3
83703.9	18104.7		18954.4	650.246
15710.2	1808.72		25447.6	2691.9
8669.67	1653.89		19675.1	1009.35
5689.77	1228.41		20547.8	1092.05
17889.9	1776.37		19208.8	11028.7
15639	1711.54		16977.9	1435.53
3456.51	1216.02		42086.2	2897.62
165749	22844.6		16830.5	776.292
5488.21	2286.07		19488.9	11102
21338.3	12960.3		28428.2	11257.2
16995.6	1812.68		113910	892.696
17122.9	2496.74		19250.5	1425.56
13998.8	1163.4		35561.1	12840.8
10673.9	1743.17		12704.5	6787.22
6858.9	2647.2		26334.9	15182.1
3567.37	1754.73		14869.8	1825.3
5984.45	1187.75		24040.2	17858.2
14246.6	2105.05		23781.9	1086.16
27281.8	1653.18		18180.7	2017.18
9045.17	1663.51		168005	4733.73
9216.83	2263.59		25407.1	1349.68
6017.47	3951.01		15628.4	818.599
9717.36	1897.2		3870.65	1452.04
16066.2	2968.53		15136.6	26927.1
15014.7	1223.48		19058.5	1113.6
3363.21	2362.31		16249.8	1080.66
15846.1	1235.85		25204	16476.6
9051.94	1156.07		24524.1	5115.61
13160.1	2838.05		22181.5	10304.6
11223.7	1280.91		22705.8	1285.18
13295.3	3293.85		23797.4	1612.98
10102.7	5432.67		25795.2	10199.5
23489.3	1561.2		22344.4	1319.59
15578.2	2550.84		20199.2	10672.4
18845.8	3116.3		24610	1475.97
9031.33	2097.61		28354.8	1681.92
5812.64	18173.5		11010.3	10972.8
14502	2726.05		19465.3	1353.27
12331.6	1767.93		22003.6	10248.5
3969.45	1831.97		16331.9	1220.31
13529.5	1599.73		18659.7	9665.49
4708.57	1606.64		29174.8	14283.9
14134.3	2015.78		28947.7	19624.7
4219.11	1551.01		21489.4	11475.7
11438.8	4859.32		41695.7	12468.7
5100.21	2499.62		16636.8	14189.2
11251.7	4736.98		21035.9	5926.88
13468.6	2194.05		23234.5	9849.64
18623.8	1216.08		21317.2	12413.5
11462.8	3307.08		9970.31	12678.2
2471.47	1177.9		24415.4	12823.7
3333.75	1551.11		17635.7	9078.73
3043.63	1832.76		16616.9	1334.63
4609.1	1082.6		24112.1	10643.8
9720.16	2101.65		15236.2	9723.38
14150.7	4167.42		38206.7	8524.86
8709.95	1591.07		16549.2	14633.3
6958.34	2691.26		26751.8	1413.19
6402.99	1203.26		10453.7	8160.39
11215.9	6030.9		16560.4	892.061
9948.28	2259.23		26895.8	1039.91
21950.2	2131.32		29653.6	10962.9
14015.6	3429.38		11700.2	11920
11232.6	1229.83		18789.8	11712.4
9353.86	1516.24		32230.5	12368.9
8187.73	2953.01		16408.6	9554.84
6081.89	1203.35		30720.7	12241.1
4023.83	1343.2		15874	9666.8
7819.95	1936.38		21027	11506.5
10759.1	3752.48		22818.1	9416.9
1889.59	2333.77		15535	11968.1
8916.15	2688.32		17049	11303.8
9798.08	1873.77		17215.6	33492.5
18688.7	1717.25		17985	8215.39
5433.77	4952.03		17303.3	9239.5
16875.8	3380.62		25222.1	12631
29563.1	1345.53		20499.4	12275.4
7328.08	1481.89		104842	11929.3
16421.5	1883.41		21227.5	10892.3
8041.98	3877.39		26298.5	14208.1
19425.1	4030.67		12346.1	10050.8
2521.86	2007.8		14418	12224.2
2101.51	1594.8		19280.2	12570.8
2855.51	1695.85		17929.8	6708.49
22456	1959.19		11380.5	9245
8032.84	1290.76		15049.9	12851.8
2763.29	1533.68		21503.9	12214.2
33217.2	3684.31		15164.3	9742.4
12770.5	8406.86		20550.5	16176
3249.48	1562.07		20304.7	24249.7
7459.39	3310.59		17688.1	12489.2
12788.4	82453.8		20280.9	9591.58
4144.7	1239.63		20941.1	13743.2
22066.9	1200.64		52256.2	11579.4
19468.7	4121.67		16209.7	9151.08
13700.3	1689.96		19149.5	12193.8
3015.06	4888.11		24076.7	12254.8
3257.04	2562.52		28406.3	11659.4
23359.4	1346.2		11816.1	10943.4
7436.68	2222.48		23616.1	10381.6
5935.65	1326.47		19726.8	10058.3
5916.49	1670.16		24583.5	11538.1
2986.81	2052.14		22699.7	1100.76
16735.8	3911.85		4896.73	15830.8
8973.64	4068.81		25668.4	8547.47
5155.43	4057.85		16964.7	11471.4
8047.53	1239.94		18857.2	4934.05
24995.5	2062.32		23380.4	10642.7
3877.82	2213.87		17696.7	12464.1
9023.41	1614.57		16416.3	10433.9
3398.53	3092.33		17107	11280
30575.6	2037.47		15033.4	10192.5
4549.81	1715.22		27115.6	9758.54
4505.09	1628.6		18295.4	12290.3
12019.4	2277.33		21886.1	10345.2
10204.9	1217.44		17813.8	6523.78
18985.1	1143.16		18156.8	8936.61
5306.82	3093.2		9606.1	20298.8
3193.03	2875.39		40964.5	11065
19567.2	1738.42		24004.5	13255.8
20516.2	1539.85		17874.3	10406.7
15527.8	1678.71		17488.9	8812.18
8915.07	1736.51		3841.64	9806.15
177673	1840.74		19041.1	14209.9
10023.2	1672.69		27054.7	10537.5
6075.94	2480.23		25977.1	9784.06
17014.1	1303.65		24917.4	13318.2
2058.46	9312.85		24634.9	1894.76
8276.86	4261.97		26913.2	8284.52
11406.7	12311.7		16110.9	14810.9
9158.15	8924.06		21271.4	11067.5
15369	3748.46		15972.6	9931.65
4464.74	6222.09		32797.6	9764.47
9303.39	8195.57		18179.1	8280.36
6215.61	7152.5		42700.3	20307
4877.78	10916.4		14001.9	9124.39
4621.41	5415.54		21235.1	17574.3
8407.42	11942.3		15750.6	13818.7
9146.11	17177.7		21717.2	2546.18
25522.3	15660.9		18376.6	10832
13600.3	5389.52		18971.4	8629.11
7616.99	1540.12		19356.9	10042.3
20944.8	13135.1		25182.9	12662.5
5661.14	9536.48		25347	8565.76
18419.7	8123.74		24432.7	10845.9
10272.1	9742.91		15154.4	10084.5
3799.97	16882.5		15449.7	12784
2921	3351.07		31904.3	11623.5
7978.85	2959.89		13242.9	10334.1
16283.7	12512.7		23804.2	10027.4
1889.39	14805.8		15543.5	10212.7
19320.3	9076.05		16618.9	7183.24
1708.3	15252.4		23000.3	10676.2
8276.18	8214.08		19181.3	10850.1
12010.8	8350.93		8642.35	8626.98
6328.16	13931.2		34744.1	9566.08
1986.6	7425.9		31581.9	12181.7
7061.26	14919.4		23365.7	11100.8
15400	14105.9		27325.5	11051.8
16359	9174.33		14722	17248.6
23488.5	11495.9		9880.23	13510
7230.93	12416.3		11709.1	9472.32
20304.3	8609.14		27273.8	25787.7
2080.05	1445.59		8800.27	8777.92
22204.7	20404.5		18633.7	8433.38
5321.55	13109.9		20957.7	13648.2
3666.83	13049.8		21446.8	12650.8
27878.4	8481.66		15095.4	1029.97
17500.2	5181.5		18453.7	562.479
13361.1	11008.2		24475.9	10122.3
9496.74	10911.5		15244.5	13854.5
17534.5	9593.61		430713	22417
14447.2	10035.6		24529.8	11815.9
10013.9	7235.49		33074.6	13435
12127.7	14915.4		22476.1	34616.5
9437.1	7455.1		37860.3	12992.8
17673.5	10815.6		22949.3	1262.88
6055.64	5120.01		16159.2	9492.62
10128.5	35411.6		21386.8	10519.2
16382.3	9593.39		23199.7	12065.2
3399.45	11874.8		29946.9	11477.7
11082.2	7059.72		17045.7	9820.53
13965.6	11466.5		16674.5	15998.4
24058.8	10924.4		11580.1	10314.1
171226	6175.93		20395.6	12338.9
14473	5958.75		17206	1715.69
12395.1	11471.8		15211	1061.83
11275.8	28414.1		19682.2	14333
7252.85	23439.7		25158.3	10915.6
14783.4	6957.4		10142.5	14445.2
2440.81	6492.65		22314	11284.3
6670.85	27248		14699.4	9310.32
18790.9	6916.23		18989.2	9363.85
13278.1	13983.1		28617.6	11570.9
8762.82	5136.13		25110.4	12494.2
17023	7166.02		17680.1	9912.42
19966.8	15387.6		20648.4	12026.2
12179.8	10888.8		10669.3	18230.8
19046.2	15989.8		17275	3613.57
6797.14	11341.8		17356.8	8879.68
11823.8	11370.5		3720.79	6760.98
12960.9	15930.6		24783.6	13634.6
23467.3	7651.46		17159.2	12035.6
29528.3	12950		12930.1	5573.84
2562.79	8864.4		19904.3	14162.5
12351.8	6515.96		22866.7	10521.1
4413.57	10718.1		15467.7	1052.99
10847.9	23633		18003.1	1170.86
6157.83	13071.7		47447.5	2640.17
6946.5	30913.9		27441.1	12214.5
55974.9	7013.46		17334.6	2682.79
31763	3247.77		13064.2	13907.3
67631.4	16288.5		18236.1	13298.3
54994.4	6447.75		14798.7	11153.7
11944	5719.59		24722.1	1102.02
23384	6999.49		22267.9	2024.14
64687.7	2591.28		17486.1	10526.4
37618.2	9904.53		13278.4	2320.33
5064.73	6023.16		19739.5	16533.6
26929.4	12258.8		15662.6	1259.27
25967.2	14027.2		21411.1	2030.82
55772.5	6387.61		23379.3	4765.55
9431.03	7523.15		13361.6	654.918
40121.3	1342.68		25295.5	1252.03
40947.7	11060.4		10645	3608.11
16263.9	3861.25		17323.9	13242
86741.8	8848.43		13828.8	7244.37
9986.87	11636.3		13036.9	3202.03
7504.92	3836.6		24777.1	2153.11
8024.04	10072		42841.7	9747.57
10566.7	37448.3		20373.4	11042.5
35450	18439.7		9585.93	13044.4
57733.2	1379.97		19680.7	14345.8
99831.8	2855.99		25891.8	1087.45
76564.1	13208.4		21613.1	10257.8
10935.2	19764.9		20274.3	13115.2
2554.71	8226.4		18492.1	65909.2
11609.5	17463.7		37378.3	11790.5
4267.49	4988.42		26169.1	2051.41
30413.7	12420.9		12978.1	15911.5
1871.42	9346.1		19357.8	15647.5
10005.5	10456.1		16297.2	11012.3
355934	7865.9		14495.5	10622.1
19153.4	9896.81		20708.3	13032.8
4974.04	9632.55		30760.6	11970.1
16795.9	8210.7		17152.8	13232.4
89585.2	13925.7		275378	22834.4
10182.6	10099.8		36329.4	9101.13
62076.3	9222.2		17815.4	12423.8
21440.2	6887.34		19357	2827.24
5962.5	12994.8		15761.7	10540.5
10619.7	6841.01		14283.4	12793.3
4340.44	11126.4		15630.1	10068.7
1858.4	21596.8		30309.7	12340
10921.3	17776.8		20118.1	9811.34
6790.55	12947.5		18347.2	9160
6539.82	11114.8		2941.17	596.355
7897.06	8553.41		7303.84	11993.5
29179.2	11690.7		14779.4	11380.5
16251.3	10872.8		40649.7	15335.1
4368.97	13810.5		24516	14209.6
5522.44	13711.2		29483.2	11082.5
2396.6	7165.91		28385	9432.66
18769.1	9686.65		40751.2	13612.3
4472	13871.9		10955.5	11324.2
3214.52	7203.48		15787.1	9079.62
2868.92	7773.76		29204.8	10054.2
13119.6	6128.93		15386.7	13041.8
4086.19	19384.8		61587.7	10656.6
15035.4	16940.5		114605	12728.3
13205.8	9701.27		91147.1	9346.12
1763.7	21021.9		117546	1124.84
13354.7	13111.9		110405	14796.8
4934.69	10161.4		9172.11	10665.6
5757.65	3460.1		7198.46	15085.8
21544.5	21796.6		41248.5	13134.4
8451.25	16858.7		13829.6	11092.5
20092.5	11590.5		184572	13439
8973.99	8439.9		20035.8	11700
12939.5	11112.7		22999.6	11891.4
11345	9545.83		66272	13814.8
7307.2	7086.36		17917.5	86421.7
10980.3	6934.85		102400	12664.4
17960.4	8711.56		20675.4	10637.1
11978.6	10896.6		33848.2	12937.6
18823.3	7794.34		89805.4	16835.4
8909.91	9545.33		10236.6	11615.6
6147.3	6742.87		20264.8	9708.12
7140.99	13751.7		17080.1	12433.3
19405.6	1415.06		110931	13358.2
6826.41	15467.9		13047.1	583.66
13242	9958.54		41992	10525.7
2987.45	8093.21		14391.1	6697.87
2769.22	9999.56		73618.7	7752.55
18314.4	14005.8		17610.5	14136.5
7318.14	15978.8		4760.91	11196.7
8044.42	11201.6		7711.16	19083.2
13909.5	13239.4		91755.8	11418.6
4639.65	9353.21		9904.54	6148.87
3802.24	6968.24		17585.8	11291.7
14271.6	17803.3		3268.49	1159.32
11816.7	8319.07		16548.7	11182.2
10967.3	21745.1		6367.05	17973.7
6178.15	9272.77		285292	10242.3
14102.8	14759.8		31058.2	13604.8
12035.5	12028.4		15413.7	10232.1
19914.4	14633.1		74079.1	8562.78
6174.75	11966.5		12071.9	10977.9
19488.3	11136.7		54007.3	12391.2
5797.15	7470.29		16617	621.649
4797.38	11527.1		41906.9	1156.85
6329.62	9062.13		30065.6	3323.97
13088.9	14888.6		112171	11526.4
11121.3	16353		2292.51	8543.99
12556.9	8207.93		27181	9878.93
4434	10722.7		2965.72	1275.75
10197.7	5979.25		156560	3799.6
12838.9	8700.98		699313	10487.5
14915.4	11952.2		7028.21	10849.9
8191.79	6500.55		24307.9	2068.18
11220.2	9747.61		10185.7	10657.4
18435	11640.8		59950.1	22569.3
17239.7	14847		2471.83	11042.3
29138.2	14950.8		48914.8	15680.4
33705.6	13810.6		46235.5	10148.3
11240.8	14560.7		25650.6	6327.91
20551.1	9659.99		8461.2	10881.4
13490.6	11405.6		209625	8145.7
7179.03	7214.2		23148	13289.7
2877.64	13434		27663.2	9364.73
9942.53	11071.9		18482.1	9638.7
5037.31	9453.4		13682.2	11584.3
17007.3	11225.8		34132.3	690.289
6756.48	14681.4		22403	1554.17
4980.55	4894.97		1521.01	9820.99
22842.7	8256.77		21741.9	1356.93
4493.32	15044.4		148955	19874.3
16440.4	13731.4		8146.29	8323.96
9086.14	14978.1		22605.2	1873.2
2484.07	14354.7		34028.3	9330.51
20740.9	8670.33		49975.9	7476.31
7327.88	12193.5		23093.3	9511.41
9980.64	9861.16		12536.7	10026.8
13731.2	18004.7		4737.55	4651.62
149577	9661.72		11565.6	9501.6
15378.5	17485.8		23832.6	7364.64
14715.5	5291.26		61400.6	9872.31
19662.4	8194.29		143292	15118.5
1915.48	14247.3		19962	8191.64
16642.4	9476.24		56323.3	6049.4
9142.57	12563.3		17110.2	3095.5
7757.2	14750		8681.29	9624.1
4881.47	9119.27		29992.2	11349.3
12023.7	14167.6		25291.8	672.261
2742.4	10487.1		51941.2	1367.09
10597.3	10030.2		44206.1	749.769
7655.68	16491.9		2749.3	398.934
7488.92	7627.9		14401.5	2022.15
7555.33	4962.06		73670.8	6158.7
11688.2	2179.8		34624.2	766.5
1758.33	13600.7		9012.81	746.808
10600.6	11311.5		22599.5	515.073
3237.65	27970.6		8996.66	511.946
21606.3	4712.4		19936.8	519.95
4024.43	16299		4626.03	360.225
16422.7	15106.7		16247.6	693.179
1906.86	6934.2		13686.2	1407.59
2658.9	7794.03		23983.4	363.197
5879.22	13051.7		21479.4	690.807
49047.1	7625		2404.51	1573.09
17997.9	13371.1		32869.1	1009.31
3909.79	9269.35		20608.5	3350.38
18367.5	3517.55		32707.8	30219.6
4774.58	7165.07		14138.3	18390.3
11526.8	15188.1		22962.3	1684.43
3383.03	13891.4		24424.8	9886.94
6957.15	6637.96		49991.4	1130.28
13827.1	25251.9		18991.6	4179.92
2873.69	11026.9		16051.3	817.743
7302.06	14648		14529.7	412.493
4057.36	13523.6		22042.2	1389.35
11941.1	11844.5		20324.3	9556.95
4708.05	14425.4		31494.2	13860.2
6558.77	5559.42		20455.1	11022.5
3245.45	12332.7		16935.8	6797.02
7367.03	15790		28713.3	13819
13327.8	17983.4		35773	6350.13
20141.5	9031.81		11877.2	12359.6
13629.1	7636.15		24555.9	7745.3
2114.45	12171.3		31734.2	10772.4
15156.9	14030.3		18491.8	12317.5
5269.89	10482.5		13427.1	10130.9
18914	11339		43666.4	13244.7
5925.55	7156.79		22981.3	435.834
65156.8	7843.39		19438.6	16648.2
26153.4	10903.5		9980.14	1043.45
2269.89	7252.33		24071.1	7474.37
5027.52	6879.3		11891	1442.71
11491.2	6252.61		17038.4	14374.6
10404.6	23004.5		34879.8	13495.5
20585.2	6637.05		38462.4	6310.91
17198.9	13275.4		13239.1	512.141
11882	3209.85		9614.48	2223.06
4835.65	8804.3		3429.52	12828.6
12041.3	17067.8		19938.3	13183.9
12387.6	12591.7		22178.9	1187.44
1881.35	13939.3		22156.1	12673.7
7030.77	12289.9		21586.3	510.633
3526.94	16805.6		65672.2	1310.91
5929.32	12676.2		43291.1	11499.2
11800.6	15149.5		20335.8	419.189
5221.42	14543.9		36832.4	568.384
9193.73	8424.18		19930.8	669.994
9364.61	18997.9		15580	1856.04
2505.5	21963.2		26888.7	383.217
3542.24	10336.3		23085	1261.3
2693.43	21198.7		27918.7	15385.3
7282.57	14242.7		20533.3	374.59
3859.32	12735.3		65144.4	853.246
15696.7	10316.9		36437.8	605.959
40702	14772.4		24892.6	1009.59
2548.17	8600.11		27380.8	1326.77
1806.31	1014.12		22449.2	444.611
1929.51	5136.44		7154.55	1339.41
2461.87	1417.43		28524.4	998.515
3535.07	12906.1		20794.4	16780.6
7115.21	17976.4		22422.9	548.428
14734.6	19619.5		12112.1	14437.6
12983.8	9171.42		16798	12716
3420.81	1027.62		31088.5	16437.8
3181.71	1040.54		37460.2	15935.4
27338.1	13969.3		18452.9	524.511
14176.1	6906.49		70954.8	15381.8
6714.19	10576.6		20908.6	13815.8
6310.67	6415.74		23254	12691.6
5480.18	5097.23		30519.2	33770
12807.8	34677.5		18240.7	14155.2
7896.28	1113.94		12354.8	11524.5
23243.7	18201.3		19097.7	13519.6
12914.8	13272.8		5683.85	15779.1
3325.51	7557.66		31536.9	344.935
8762.22	18012.5		23038	12140.3
8916.92	6049.28		10511.9	15188.7
1892.05	10023.1		28180.9	485.385
5544.97	15728.9		23779	11218
10489.8	1030.43		13869	12938
19098.6	26918.7		21925.9	12772.7
3515.23	14298.8		30727.7	1085.79
14455.2	14374.5		23529.9	831.276
12159.5	7800.78		20796.6	2265.48
12933.5	8745.77		31359.4	12239.5
15849.2	1283.41		29157.6	13699.3
16308.8	15546.2		21933.5	12784
7920.64	17661.4		14805.6	14346.1
9273.88	7692.03		27345.5	11669.2
5221.47	12370.1		14436.5	12312.9
15195.8	4217.12		18654.9	12383
9503.68	16426.3		21090.9	1615.18
7453.56	11823.8		31692.9	13587.8
2891.02	10907.4		34921.5	12895.3
11188	1332.96		193938	15281.5
2836.16	11269.7		12300.1	26663.4
12981.8	7312.32		20014.4	15432.6
8724.08	13193.2		5324.89	14060.3
20167.5	20913.3		6661.95	10955.1
5784.18	15950.4		17076.1	10731.2
2413.91	11488.5		53894.9	12315.2
13069	6692.86		61258.1	22888.5
3029.55	16722.4		15838.9	12814.3
8886.59	10845.8		20230.3	11987.4
3742.3	7405.18		32396.1	12740.1
13091.4	12189.7		22321.6	13266.2
4245.64	15403.6		24629.9	1871.69
8879.71	9194.24		42651.3	13656.8
7457.7	6851.49		30746.3	10009.9
3659.04	13294.1		13493.2	13848.4
3318.98	13182.6		45733.9	14561.1
8650	12491.9		8460.65	1351.9
2363.95	9187.1		48736.5	12210
14407.2	7062.75		18639.9	13999.5
9979.87	7419.63		24498.4	14909.8
10472.5	12296.7		27443.2	19190.4
2269.36	8003.72		1577.39	14100.9
11041.4	1443.81		18008.1	15834.7
11881.2	10657.4		17644.6	12262.1
14295.6	1506.86		21631.1	13049.9
5653.84	8610.46		16281.7	700.578
6944.71	5631.73		22779.2	15612.4
13463.5	13340.5		18704.5	13288.3
3540.24	4947.57		13704	14263
14928.3	6732.83		51110	28572.9
9967.83	9829.34		24034.1	12538.3
5387.87	5394.62		26800.5	10997.1
3046.29	22519.1		11704.1	13270.4
22084.3	11280.4		9036.05	10865.1
13698.1	12430.6		20925.7	12699.8
9786.18	13815.4		18806.8	11811
7628.02	7287.69		25954	656.165
4279.67	14273.8		38047.9	11591.7
10959.4	14363.9		15188.4	12598.2
7458.21	11842.3		19105.8	11415.6
5257.22	12578.8		52633.4	511.638
8525.11	2249.98		21190.6	15512
6598.01	16565.1		13615.8	1705.65
8030.76	8334.12		20069.3	304145
6413.69	15934.5		56957.4	7645.78
6513.98	8666.67		30909.4	537.794
3706.61	9210.97		25755.7	2221.78
6874.18	9602.5		11790.7	453.728
19052.2	3003.68		38535.7	414.908
15344.5	6894.24		69227.2	2856.66
12075.3	14152.8		36972	523.342
7011.69	37056.7		3715.83	4306.83
5509.99	11500.9		26722.5	1465.65
4206.1	6078.97		29922	3244.74
2918.49	86850.5		17219.4	515.542
16639.5	13255		22732.7	744.713
2392.12	8328.93		16952.9	713.604
6153.38	13390.2		4826.65	1777.14
23262.6	14881		22182.5	2311.78
8559.21	11485.2		16626.1	940.693
8080.03	11303.9		18983.7	11914.8
2588.66	12221.4		12523.2	9033.74
2075.54	19796.2		15259.2	21245.9
4887.09	28131.6		18522.8	7387.95
11622.2	25720.8		44901.1	6383.97
8329.64	9370.83		28161.3	9956.41
7511.84	27523.8		20227.9	11046.5
8875.92	17797.8		61331.2	9241.95
3880.97	12073.5		55545.7	12374.8
10613.4	7878.2		21979.1	9660.28
18315.6	16630.1		21391.3	7860.79
6337.16	10151.1		43482.2	1611.03
5467.71	27134.1		23981.5	9524.76
22974.1	8349.13		27181.4	17579.5
17823.5	7475.17		24941.8	3035.31
8020.99	9681.94		16815.7	10781.1
16437.8	12565.8		25294.3	10267
1749.71	11929.5		39396.7	8872.03
2921.86	2693.34		18529.2	11707.7
2074.92	13377.6		19877.3	10209.9
2516.18	16646.7		10896.5	8513.68
35710.6	19685.3		95620.1	6446.94
16766.5	10543.1		18474	9415.62
2929.43	16701.9		27780	11820.7
5762.59	6626.3		10411.9	9101.79
18595.7	18725.8		24779.6	8866.81
13388.9	9621.35		10665.9	8892.38
6042.92	6489.18		173054	15813.2
8921.11	26084.3		28916.4	7701.06
16903.2	7023.94		23728.5	26030.7
54080.4	8401.16		45175.3	8251.87
3909.6	13978.7		17422.7	22230.3
10569.8	1396.04		29137.1	9883.11
10155.6	21844.9		16721	8915.37
7342.23	10454.2		28557.2	13833.1
27133.2	5278.96		30533.4	7932.88
14653.1	11273.7		13131.1	7910.46
21599.2	16579.3		24051.4	9291.57
14242	6576.93		31120.9	11370.4
14027.8	8925.42		22450.6	7763.11
17829.8	8551.16		40794.2	12716.6
2502.6	50932.8		10901.5	14970.8
18967.7	14711.3		11285.4	12641.8
11573.5	1764.59		15185	9096.23
12386.5	13129.2		37839.4	10876
2682.41	3212.77		33043.7	12641.6
17209.8	1125.29		26056.1	6230.6
18028	2128.27		22084.3	9322.91
21023.9	5169.84		9212.32	10966.6
23272.9	15414.5		22218	8817.48
15785.2	1942.99		2920.09	8729.84
5904.76	1326.8		40605.4	11815
30498.5	1879.32		4084.64	9803.49
5794.36	5380.43		27521.2	12101.6
11340.7	2662.01		28033.8	9238.16
24718.7	6994.5		21402.6	21670.7
14809.2	8651.53		20640.5	10062
21569.1	15816.6		35878	11734.6
3767.12	8434.91		17478.9	5513.24
23250.9	4604.06		37230.4	10783.5
3576.32	5915.28		19461.6	9706.5
6944.93	9528.04		4656.77	8702.42
11040.3	14479.4		38777.6	12457.3
7556.66	5244.01		3130.38	9417.33
18489.7	6953.07		21834.2	9491.64
4103.69	6898.08		16682.5	10267.3
9366.8	15259.8		23757.7	10494.4
15822.5	6027.67		31583.7	15728.9
15627.7	4038.15		5040.3	10198.7
16397.7	4502.25		18568.4	12292.7
16535.3	15563.8		2767.62	12940.5
5751.96	1643.02		20457.2	12811.3
6004.05	2092.74		23084.6	11246.3
9784.1	9641.64		10713.6	10933.5
14978.2	1348.08		24008.8	10499.7
109390	1519.26		9247.65	11826.7
12747	14949.6		17017.3	9946.2
9940.8	10426.1		10058.1	11291.8
5864.15	930.257		36142.1	6844.93
22016.8	8021.04		12366.8	12654.9
10262.8	1743.24		7644.3	8991.52
9327.45	8924.48		18209.8	4499.96
16403.9	10664.1		13937.5	5295.4
12074.3	4512.9		10657.3	9519.97
8492.55	8988.19		21279.2	8862.86
6647.04	15282.8		23599.7	10686.3
7684.41	17519.4		7880.44	10070.5
18208.7	10908.4		28302.7	13065.1
33060.4	12664.4		26136.9	12997.7
32294.1	12626.9		51157	8468.46
13187	10735.5		135274	11615.4
18160.8	19216.9		60194.6	12285.5
22335.3	12806.7		66910.9	11696.2
12092.5	10426.6		22469.5	5943.87
4945.21	16011.2		56908.8	11182.2
295751	16369.4		12502	9131.56
8030.88	6946.22		16363.9	9341.03
9492.56	12497		16466	9061.14
3702.95	8370.81		17149.3	5409.18
5632.74	14244.2		28342.1	12667.1
7713.96	8498.35		19563.9	10438.2
23111.7	7478.37		31746.9	13887.4
13475.1	14382.5		51594.7	19348.2
3707.98	8243		11067	12975.3
20044.8	11515.7		23875.2	9745.03
8037.6	10019.3		21903.7	9626.69
3454.64	11667.1		25125.9	12771.1
9361	9610.22		28211.2	11675.6
12494.6	11830.8		16904.8	7695.22
11225.9	21665.6		16905.2	11699.7
10770.6	3256.46		10480.6	9190.1
7730.23	19326		5741.81	10477.6
9169.38	14230.2		15987.2	10837.7
16255.2	12890.8		24385.2	19713.8
6503.04	968.914		10962.1	11925.5
10506.8	16256.5		14864.4	10037.1
17680.1	11813.6		15918.8	10544.8
6209.52	11196.7		23133.8	10197.1
7532.33	18172.6		9180.5	11392.3
16834.4	1300.48		22894.5	15506.1
6284.89	29310.2		12258.2	11317.4
5583.28	900.89		22057.5	10507.1
17304.6	2321.45		8436.08	15368.5
10619.8	1441.63		23580.5	9189.01
6780.48	1613.58		36423	11633.4
14965.6	3079.47		19919.8	13672.7
8554.25	4366.93		7365.56	10487.2
18362.5	1423.25		25537.8	10372.5
15415.6	1476.65		30713	11835.5
7885.32	1604.74		5797.85	7884.3
4564.85	2288.31		22575.7	11706.1
9915.82	5667.99		39384.5	12582.9
4315.01	1404.7		11472	10275.6
5204.01	1019.24		13330.4	10955.9
17859.4	1372.78		22102.1	7327.96
13558.6	925.107		13799.2	12552.2
13516.9	2448.14		9682.37	4469.85
6801.62	11120.5		35602.8	10543.7
3465.11	923.413		23585.3	8430.03
33468.5	12799		13589.8	11432.6
7732.87	9344.19		31592.3	11483
20603.8	1318.93		13130.7	7627.4
12462.2	2074.71		6689.65	8922.21
10249.7	17373.4		11509.1	12360.5
5488.08	11995.8		9346.77	13351.8
12759.6	15245.5		20315.2	1281.04
18480.4	1303.98		22649.8	1683.97
31077.9	2647.19		16915.2	9198.61
16677.7	25413.2		26826.2	11421.5
28910.6	10383		23329.2	18306.1
3992.53	15470.8		71618.7	13907
27003.1	12982.8		16647.6	10630.9
30465.3	11958.5		19153.3	10257.5
19815.7	13539.8		15942.1	11402
16180.6	13421.1		20801.7	9162.16
13423.2	10916.8		18119	12735.2
18100.2	2473.54		32708	10332.7
23429.2	23881.5		18082	11903.8
3754.11	9591.49		16832.7	16349.2
64633.1	16079		48150.1	14080.9
27588.3	14605.3		19567.3	12382.6
13185.4	11753.7		27015.4	11131
6979.45	7347.31		23719.3	11448.3
17832	22173.4		47218	13428
18799.7	9797.44		25358	10816.7
17053.6	7530.36		20009.5	10255.9
37879.5	13945.4		37255.5	10582.5
17270.6	10596.6		20424.4	15063.5
12114.5	16208.7		18757.8	15080.8
15264.3	20373.5		28753.8	11808.6
12320.3	21727		7045.58	10525.9
31643.9	11569.7		14380.8	12358.1
8003.84	12026.8		20724.4	10003.6
14022.9	10660.8		35446.5	9041.24
13229.4	11419		10442	11038.1
10042.1	10505.8		21311.2	9860.37
22105.3	9734.51		24172.1	12135.2
15383.7	20357.5		38633	11338.3
3176.18	1072.2		16647.1	12984.2
10557.2	4254.14		19047	16258.1
8331.61	12296.1		9077.57	11927.4
18143.4	10390		25934.7	10219.9
9345.59	12897.5		14774.5	13111.9
6677.86	9908.65		18537.4	13723.9
7596.97	14649.8		33077.6	12054
22270.6	7259.68		8095.56	6410.56
29181.4	13064.8		7769.15	12503.9
5606.12	27330.9		15248.8	4053.55
8854.16	35035		14770	14513.9
35286.8	10147		34762.6	9754.3
21433.2	3308.57		17172.8	9270.66
5362.57	989.48		11867.5	9276.84
24246.6	16323.7		15365.8	17317.5
6334.19	2342.02		17100.2	3321.86
13095.7	11793		13772.3	14716.4
19002.4	14102.4		8024.35	9774.96
16582.6	10980.7		16827.2	13723.2
3921.84	7652.92		14800.4	10582.2
7039.84	14813.4		15844.1	12132.3
14350.8	13729.3		15341.4	11097.1
4289.23	11085.4		15663.4	13271.9
11202.7	10009.4		13286.4	2999.15
3907.83	12045.9		9874.89	11363.4
11320.7	21930.5		11596.7	9539.42
11178	7481.59		13668.6	11523.6
31445.5	7146.84		40506.4	10818.7
4205.5	12536.7		18014.6	9846.91
27831.4	6732.91		12028.7	9149.99
6060.74	10634.5		2836.33	14937.5
26873.5	10481		3952.53	12530.3
10511	10390.3		8032.73	9637.46
16252.3	11358.7		8399.16	10586.5
19991	975.463		5545.96	12494.2
20128.4	13343.5		12623.4	13375.4
15825	27538		7984.17	9995.41
16891.8	7133.96		13849	14050.4
11688.4	15066.4		12023.3	9058.65
21036.4	1340.8		10463	8926.82
9735.04	12844.7		8093.03	2068.8
13833.3	15130.4		11990.3	11752.8
26793.7	11805.4		12082.1	10525.4
5479.85	14729.9		12767.2	18994.9
2765.05	11245.5		11188.9	20753.3
3828.46	13232.3		31515.4	14166.3
9822.92	21061.2		10778.8	14368.4
37770.4	8441.34		9089.32	13419.4
9160.77	5163.91		12249.7	12707.8
21424	9365.78		24207.6	8209.84
32929.3	12122.6		5001.12	7915.72
7404.16	2060.46		6776.35	14125.2
36083.4	10079.1		11301.7	13453.6
18311.9	7631.93		13098.5	12878.7
6408.15	1175.92		11598.6	12568.2
15482.1	14768.5		13556.8	9467.46
4892.8	9343.86		15019.4	10442.4
44080.2	12419.4		15876.2	9103.1
22979.2	1417.43		15119.7	9774.9
7145.29	16184.1		15074.2	16236.6
119988	14941.1		13000.8	11820.2
33520.4	13485.6		19317.8	9890.77
11277.4	10070.2		15073.3	13223.9
18570.2	9595.48		11370.1	9798.64
6109.57	7974.37		7420.38	12850.9
14816.8	12478.3		17718.9	13031.5
8111.82	1515.14		15820.4	10181.8
12639.8	16027.4		15605.2	2897.97
3081	11623.8		10171.2	12471.5
17007.1	1919.24		9445.3	34086
20799	11841.9		10599.6	10595.2
11203.6	4274.78		97454.4	13348.4
3829.64	10769.5		20753.9	10550.5
11120.7	19523.4		15917.6	10895.1
10480.9	8995.22		14681.4	7408.67
5025	16007.5		12141.6	10439.5
7800.51	10648.4		8495.75	9517.91
11454.9	16730.4		3929.05	8129.48
4140.52	1955.44		10243.9	12841.6
6486.09	2886.04		18199.7	10171.1
12148.7	13919.8		19260.5	13299.4
19139.4	14954.8		15810.2	25719
18666.1	10978.6		10190.7	9393.97
14115.9	11539.7		14341.1	10020.9
16030	927.031		28666.5	18032
18264.9	11152.3		18029.6	14621.5
15474.2	45285.6		20863.3	10808
28699.8	3605.18		15392.2	11913.3
12664.7	1771.15		8937.44	10942.8
8849.39	14134.2		17597.9	14320.9
30254.6	10303.3		21402.9	9546.05
10009.8	8739.86		5362.61	11133.6
40049.6	14593		15156.8	14239.7
7999.48	14468.5		6568.12	9230.34
12805.4	11701.7		111353	9330.45
32060.5	17256.8		9699.31	10190.9
15824.5	17360.1		15139.9	13512
12732.8	19738.3		19285.3	10072.6
14188.5	7363.13		25814.5	10320
11382.7	10073.3		25502.2	10083.8
22754.4	13215.8		10751.2	10791.9
10862.3	16392.4		9169.9	5687.05
3893.03	15889.4		44973.7	28302.4
9389.46	13037.6		10013.7	10100.8
9466.56	12029.5		12647.5	13578.4
23541.6	8344.78		7967.58	18119.5
22519.1	11332.8		11950.4	10518.8
8057.57	12893.5		14240.4	8971.95
13937.7	14173.3		16006.9	11687.7
3155.32	14092.2		21098.9	7801.55
16785.5	22956.5		21477.4	12346.7
12873.3	10744.7		20800	10530.1
5004.75	12487.6		11131.9	11422.1
23317.5	8038.76		5712.01	21394.1
14549	4569.55		17533.3	12036.3
5243.34	19374.4		14554.5	10100.4
10590.4	8873.83		3314.72	2885.25
12001.5	6488.34		10885.8	10485.3
21574.4	1029.25		8069.44	14439.1
32298.8	5210.14		11045.2	11805.8
19000.1	10083.1		14255.9	6855.88
22683.5	23112.9		13244.3	10197.8
19022.3	4698.81		4628.58	12982.6
17502.8	8413.58		14498	8541.39
4601.38	11598.5		16786.6	14874.5
6918.63	10882.4		13202.8	9805.79
16239.4	5536.12		14278	14978
2909.97	15609.4		13670.2	9232.51
2981.08	19411.6		13903.9	13475.4
33663.7	17705.1		53597.4	25753.7
12385.3	10024.7		9893.7	12319.7
13411.7	12766.1		4113.9	12626.5
33137.8	14470.2		6192.17	23168.4
5940.76	17028.4		18023.3	10248.7
14119.7	15615.2		29989.4	10518.8
20754.6	12301.7		15386.8	9658.38
15167.7	9105.86		21573.4	8677.84
8427.1	15487		16069.4	8046.66
15885.3	14719.1		9242.74	11188.2
17445.5	12852		10017.5	16900.7
13566.7	11655.4		11023.1	15005.1
18341.4	13748.6		7865.75	12312.4
10097.3	5635.07		6193.43	8939.51
5229.46	15408.8		10149.7	8655.14
6326.49	11063.4		10455.2	12931.2
10141	1414.4		17133.5	10705.8
7020.67	13638.5		25351.1	8676.89
23078	2697.46		5206.85	12892.6
6381.33	10516		9160.65	10083
4703.76	23928.3		11386.1	7808.92
4104.44	9434.3		16100.6	10140.2
3410.19	9631.07		1961.66	6897.86
5227.46	13115.8		17792.5	8256.86
20749.2	24435.1		9992.07	10772.4
11660.5	18176.4		15384.7	29666.9
8618.23	14287.7		8612.37	24753.5
10707.9	11151.9		12669.6	14079.8
5522.03	9038.53		12498.6	11734
31947.4	27790.5		295476	22539.2
22668.7	7562.91		10310.7	4386.62
19564	18021.2		7468.87	9628.4
12094	14887.7		15584.7	11084.3
824134	5358.61		11313.2	11575
2886.57	7468.84		6036.23	13571.4
9256.54	13734.9		12440.3	12495.7
23930.3	6558.24		8715.92	8419.22
7940.68	6250.1		15330.5	11520.3
12077	2653.27		24790.5	14206.7
17393.2	1423.65		14179.1	13911.8
11750.4	10597.2		20889.5	11498.3
27858.9	10434.1		5327.7	13724.9
19641.7	12857.4		11366.9	9466.78
18446.5	10565.1		25314	9667.82
3852.85	1310.75		9101.64	13657.5
45361.7	10620.8		115925	13814.8
7270.23	9117.53		10360.7	13740.4
23558.3	13054.7		15294.7	13502.7
19449.3	9566.6		7390.38	13047.4
8160.38	11400.5		14379	13579.9
5427.71	1917.07		10603.9	19003.2
19157.5	1584.56		12171.9	14871.6
14870.8	11195.7		3528.52	14155
11656.6	8265.81		1995.51	13129
9426.36	11265.3		9791.95	11942.9
10157.7	2249.06		14475.1	12587.1
16449.3	1344.59		9417.24	9253.95
18519.2	1304.66		100672	13697.7
31700.1	13288.6		13908	27556.8
16357.1	2304.68		13042.3	18877.7
31879.5	14857.9		12058.8	15057.9
42243.9	14574.4		12295.7	13709.4
18771.7	14581.4		11247	16103.7
4649.09	16514.7		10129.7	9918.69
6464.18	11190.1		11797.5	12518.6
11416.3	1007.32		12202.3	10996.6
24339.2	8263		16454.6	6648.18
21476.4	1273.64		6953.99	14151.1
14312.9	10225.5		132648	11897.7
14104.6	13730.5		19326.6	12522.1
11581.4	12777.2		15524.9	13266.9
13499.8	5876.9		15083	13079
32232.5	7042.68		16296	14280.8
18646.7	12017.1		12188	1499.9
8192.09	11253.5		10999.2	13416.9
15054.2	16437		31499.1	10859.6
25548.1	11447		17162.5	11921.4
2628.64	7581.64		32194.1	9400.3
13175.1	16522.6		14511.1	10347.8
25991.3	10661.4		8692.16	13316
16191.6	13581.1		14764.6	13620.9
2607.98	971.021		9997.89	16452
22174.6	7256.95		17027.1	11489.6
8513.16	12874		152740	13952
30263.3	16565.5		14217.7	11476.9
16883.9	9504.48		19245.5	13023.7
13691.7	12309.4		30823.3	14718.9
10878.6	26978.2		12128.1	25758.4
21606.9	4900.18		46246.3	17297.1
23846.8	12024.8		16907.8	17122
15710.4	12769		13586.2	11948.2
5867.45	13481.9		11078.2	10735.1
25119.5	17679.7		14415.1	9874.76
6633.55	14043.2		14513.3	10438
40528.4	11041.5		13241.9	11802.3
49718.1	16034.3		16755.1	13416.1
8683.45	13848.2		31094.7	25902.8
20728.2	19892		15089.9	11249
15552.3	11700.2		6962.2	3657.77
6843.24	5854.7		14137.3	10535.6
2889.08	4764.7		8775.86	12700.7
4691.52	27222.7		2794.24	12302.8
6227.97	10359		17487.5	22886.8
8750.76	10069.3		21362.8	11382.1
40300	16520		14954.6	12974.4
2535.3	2762.31		10707.4	26409.7
10949.4	8337.88		10799	8031.84
29376.7	11420.9		22637.7	15247.9
15641.3	11228.4		5190.76	19852.7
15412.5	15580.3		12880.2	9780.84
11077.6	12555.9		22913.9	11239.6
9929.31	9962.43		8542.14	9641.38
52135.8	15985.2		13498.5	14692
24671.1	17650.8		18244.4	24355.3
4966	17569		19196.6	18215.5
16723.2	9958.8		3901.56	21295.4
9673.5	2389.76		8961.19	12999.8
20658.5	15096.1		86145.6	24406.8
4718.63	16218.5		20761.9	11798.2
11810.9	34637		7959.19	24919.4
33890.5	11176.2		15930	14400.1
14000.1	8773.21		11007.5	15883.5
10031.7	6958.29		14161.8	12851.3
8677.96	11459.5		13496.2	12406.5
10363.1	11199.1		15516.7	12830.2
20270.8	12780		10119.7	12302.5
34469.5	8473.42		8330.61	12046.3
5734.17	8037.27		6297.19	14933.7
17135.1	11665.3		16642.9	17927.2
5027.02	17938.9		17520.6	9609.87
10954.7	1760.36		10355.2	12488.5
21266.6	20146.5		8391.02	16026.4
13305.2	24986.1		13738.6	10119.6
29449.6	14363		20513.1	13025.6
26891.6	13660		15877	13416.3
16277.1	10569.7		18391	12843.1
11676.1	1224.47		12731.4	10911.1
42168.2	9501.34		11466.6	9881.29
14957.8	24130.6		14040.9	13965
8117.23	10170.5		10567.6	11721.4
8775.91	19025.9		9268.41	142382
25683.6	8513.79		31963	9492.11
51841.9	8239.37		14141.5	15422.5
14947.2	16302.8		10848.5	13721.5
2930.23	35576.6		21830.2	9484
21744.6	8312.42		7231.57	7779.22
13875.3	14545.6		6796.62	31188.3
19068.9	3155.73		30686.1	9903.65
5269.28	11769.4		9969.08	15795
9052.74	2862.07		7877.31	14999.7
44800.4	7160.45		7224.92	11609.1
4143.71	12327.6		12595.4	17539.9
18517	2541.35		11233.1	14226.7
6750.47	2212.19		13686.7	12295.8
12032.6	1213.37		20594.7	16042.7
18254.5	19450.1		18604.8	13511.8
25202.7	12829.9		22663.8	13232.1
10740.6	11134		26609.2	14192.1
9999.64	9653.45		16148	8623.63
15443.1	8474.03		3643.83	12843.1
6564.62	1020.4		11748.1	14768.6
7832.54	12203.8		7193.12	15699.5
9483.17	5861.73		14306.2	12483.7
17735.6	4414.89		15809.6	14120.5
11395.4	14143.7		21330.2	10422.3
7321.05	9363.86		16438.5	11213.4
21671.7	12047.3		17102.8	13938.9
22620.1	13048.5		9370.47	12483.6
12093.7	16570.1		17786.4	11828.9
26895.2	10381		33332.5	19216.8
8697.8	17132.7		16513.7	11824.3
3140.89	18572.7		4350.69	11354.5
11165.6	13487.8		12248	14278
28701.1	16006.9		11178.2	12075.1
20975.6	19980.9		9089.67	20311.2
41347.3	986.062		7862.82	10750.5
45025	11829.3		12253.9	1553.59
9565.46	1019.84		25803.6	15055.5
15225.3	3098.68		8313.36	9537.41
5327.16	18032.1		7898.33	14568.9
16987.8	1581.98		7310.62	12773.6
16141.2	2107.17		33348.1	15397.5
56751.8	1044.51		71653.6	12623.6
7218.56	12673.6		7677.31	11309.6
10967.6	4344.45		3940.74	10635.8
27283.4	16519.9		12324.9	10910.9
19816.2	17564.4		14762.9	10691.1
11288	8227.48		28156.5	11263.3
5220.6	12482.1		16062.3	13447.3
20603.3	4450.53		2796.54	13823.5
19696.1	9694.15		17185.2	7444.78
18991.3	12244.3		67027.9	9114.06
12384.7	14923.9		27772.5	14112.9
10757	6964.57		6084.84	11232.5
28733.3	13072		6722.24	11966.6
4308.64	11581.7		15948.3	9648.45
36976.5	6485.45		7192.66	10866.3
14276.7	12577		8438.81	14496.3
13016.8	7605.42		14731.1	12439
39588.9	8622.76		7598.81	9736.71
42156.1	62902.2		32224	10270.3
27265	15514.3		16966.1	13903.3
9152.32	8475.98		18758.7	16294.1
10145.8	8049.33		3877.59	20341.5
101832	9488.56		7362.09	10758.2
17731.5	14041.2		12054.6	12428.9
35676	2735.13		18308	23110.2
13704.6	26924.4		9043.6	13021.4
11151.9	14180.4		29393.6	13059.6
3592.5	11966.1		21951.6	10481
28221.9	8255.52		64354.4	17705.6
20368.6	8819.94		23657.2	12933
26522.2	4850.75		37954.5	1170.14
9082.96	8546.98		8152.06	14603.2
204895	6372.11		3498.71	9090.91
15276.5	8669.03		30328.9	166903
16461.2	6286.54		13775.3	11565.8
21762.4	8789.71		8762.03	13110
6828.96	14149.3		3984.66	14138.4
12012.4	11230		16574.8	17592.7
9681.12	10711.7		8530.34	11521.5
23452.5	9112.6		3757.19	16197.7
11429.5	14987.4		7188.79	11175.8
49152.3	14690		17954.4	12058
18117.7	8828.6		11338.1	19327.4
2771.53	13760.2		8752.33	14683.3
44875.4	5066.27		11939.7	31498.7
38562.5	4024.48		37411.5	1161.97
16362.8	16804		2636.62	12994.3
10210.5	11955.7		27084.1	27058.1
21263.7	9395.25		10937	6908.11
19963.8	6224.03		8219.9	19761.1
13802.8	2145.78		2610.13	11368.9
15733.3	12543.7		15027.5	13764.7
48138.5	10904.2		6519.92	13937.7
16163.4	3127.22		21739.6	11787.3
7377.92	11814.2		17466.6	11347.9
4832.64	29722.7		17241.8	12729.5
19528.6	11721.1		29358	15864.1
12373.1	11699.5		10580.9	50386.6
25636.6	8687.49		41866.9	13897
10974.5	22664.8		13916.4	15128.2
39657.3	11379.8		11388.3	15781.1
34868.7	13244		8858.66	15408.7
79290.7	12124.2		33876.1	12911.1
5477.4	7397.78		12857	10699.7
6012.39	6846.64		20912.2	15732.1
22208.8	11662.3		19738.3	15675
21798.4	4154.09		13005.8	11130.6
9547.86	16865.7		6139.64	11560.3
11001.9	8570.65		7490.19	16913.6
8335.69	4162.02		16149.5	10183.5
13735.1	10316.3		21166.5	15398
11581.1	10415.4		15425.9	16605.3
18396.5	12931.8		12445.5	6674.51
5603.14	16235.9		8174.51	14518.3
61138.7	17895.8		6064.07	8982.48
20024.3	8186.14		44967.9	13870.7
5491.59	10439.1		8307.3	12312.3
10986.4	10850.5		35865	12162.2
16646.4	9067.3		16232.9	15057.5
43133	10306.9		5503.83	5800.21
38452.3	6138.82		16721.3	12528.4
13958.3	5970.79		15340.3	24485.8
12934.1	16346.3		36123.9	1341.09
16026	8766.47		9745.55	11023.7
13587.8	9353.58		21802.4	1550.43
25297	16317.1		6015.7	1305.57
15915.2	4874.01		3730.71	9813.32
26807.8	12529.1		11936.7	14573.9
4930.73	10184.6		4747.36	14445.9
14560.6	12987.4		5771.41	14137.8
81833.5	13070.9		18143.3	14310.2
19148	14143.4		3285.12	12525.7
12665	12319.1		22440.9	13723.2
38370.1	6525.09		11874.4	13652
17965.1	10879.3		3909.85	11198.2
11001.4	11149.3		17196.3	13204.6
6742.79	10666.5		30132.3	15446.6
7546.35	9068.37		21816.8	12784.6
6977.78	6917.05		13702.3	9921.33
17706.4	11156.8		21711.6	1268.57
13115.4	14434.3		8600.68	15036.2
6528.5	9012.83		12046.7	16017.2
3930.29	17174		9150.03	14761.1
20618.1	12445.1		35898.6	5071.78
29413.2	5919.13		8573.78	11522.9
16121.4	6890.27		7729.97	15465.5
11144.5	8084.05		6919.78	14614.3
36181.5	10846.3		36365.9	12536.5
16388.5	6003.41		6254.49	16114.2
17206.2	8348.68		20440.9	8593.86
5725.5	6682.27		26183.4	1686.61
18515.6	2822.42		17373.5	11534.4
8253.52	11719.3		29376.1	1946.97
234641	20278.5		11856.7	2319.8
29725.7	7987.04		14082.9	12344.6
5140.27	7943.99		12339.4	14278.1
11347.8	35943		43411.4	12602.3
253583	1695.88		16409	9739.89
12407.5	9224.9		15172	14573.5
19845.4	4090.74		14932.8	11004.9
44077.9	11401		12490.7	12330.2
18176.2	3046.71		4370.29	12836.7
37407.5	14742		22655.4	9460.98
29323.6	7331.69		11372.5	12744
11548.2	12560.1		15681.9	9325.9
12772	2132.41		10978.4	21816.9
7694.85	7161.76		16629	13740.4
10919.2	13306.3		11673.1	9582.58
10161.9	3904.37		7466.42	10339.1
5046.12	6990.47		6295.81	22706.8
10563.8	9480.6		20922.5	13853.8
10777.2	11993.9		10441.2	11369.7
47501.5	20478.3		5877.72	11887.1
20078.8	7522.71		23554.9	13867.5
8018.61	8455.15		4957.52	34871.4
19479.2	4512.94		14324.2	13293.3
25307.4	10380.9		103570	11326.5
9516.58	13231.2		25319	13009.5
7014.27	15015.2		23230.9	9245.25
13521.1	5125.16		11689.5	9802.08
13857.5	4090.87		12481.2	9521.33
9776.37	3163.89		11658.2	11228.5
44743.4	14563.3		23273.4	13794.3
15764.6	3686.18		12937.3	11920.7
13667	7751.79		7629.61	15135.1
4631.66	10094.3		9542.53	9175.38
23698.5	6129.7		12003.1	23243.9
86186.6	15488.9		18758.1	12124.3
6228.75	8292.54		9707.31	24460.7
11770.3	6831.28		13891.6	7822.17
200265	7486.76		4678.92	14915.3
9356.07	10943.3		5838.72	11462.7
18942.1	14491		21220.9	11502.5
11000.4	14126		24861.1	37269
37131.5	10200.7		15415.9	11428.9
31578.4	11592.4		14613.7	12556
21510.7	1766.68		11059.7	2562.12
22265.5	9915.44		6726.64	12410.8
21115.7	8997.43		6815.08	13684.1
24888.5	14937.3		6660.07	4702.96
23779.5	10145.2		9346.72	11093.1
12280.1	6178.01		14399.6	11558.6
24255.3	9558.09		12505.6	12198.1
16570.9	11603.1		18142.4	10467.8
8263.42	14676.9		14057.4	11030.3
49916.9	15107.3		24250	14597.4
14868.7	7638.04		17323.9	13375.6
10661.4	7668.06		2331.29	12045.3
34604.5	18032.3		19872.5	11213.8
32702	13862.1		8910.35	11988.5
5725.89	8721.98		31980.1	9112.7
4605.96	3245.04		17500.5	10895.4
4839.83	14157		4636.27	11000.8
22997.6	10381.3		4637.24	12008.4
53027.2	6164.64		15591.6	12471.5
16943.3	16375.3		10861.1	10354.9
3762.23	11160.6		16593.3	13700.3
59583.5	5458.56		12056.2	7677.65
21721.7	12223.4		10179.3	11808.8
9007.86	7388.71		12105.8	13633.8
186936	14052.6		16585.8	9886.17
11317.2	11196.9		2981.26	13398.2
32834.4	8344.33		10058.7	21554.3
22338.7	8221.19		3880.69	10952.9
28592.7	16179.8		23396.9	12939
4229.8	14718.2		3126.34	17300.5
6745.59	14916.9		21493.6	12643.4
17004.5	7665.33		10913.9	20622.8
52220.5	9632.38		8251.91	12051.2
5888.36	18567.9		13720.9	8832.48
5131.14	10224		18433.6	7617.28
25545.6	15879.2		11732.2	21380.6
8846.79	7256.2		12091.5	11447.8
6334.42	9266.95		7325.56	21527.6
44203.8	25957.3		18197.2	11184.1
27234.3	13587.7		13435.7	28451
17750.9	14121.8		8581.34	10773.9
11965.6	7551.38		23174.8	9319.95
30718.8	16574		4492.27	26908.1
15725.4	11718.3		28998	10968.9
47285.9	15785.1		8493.64	10362.5
29953.8	3635.77		9455.81	12662.8
5034.58	2971.67		8725.16	10558.9
3656.28	8028.78		13814.5	24694.2
38339.5	12553.9		11936.4	15569.8
30381.4	12446.8		8597.16	8441.43
8620.11	9588.33		12451.4	15831.3
6229.31	4054.31		10978	10116.8
5585.72	11641.1		21329.2	21105.2
47032.2	6139.21		15498.8	9864.41
54737.3	8971.85		10457.2	10158.9
15456	10627.7		3743.04	24814.7
6913.62	7497.7		12987	7619.7
36433.5	12878.8		17559.4	3249.05
15329.3	15103.5		22089.3	142176
19026.5	11781.3		7511.58	12527.6
43081.2	20579.8		18477.6	5731.88
8384	14133.9		3979.27	11300.3
32590	12970.2		26292.1	19756.4
10737.4	7114.98		22543.7	20409.4
66032.1	7664.56		7754.54	8949.02
7767.75	7612.48		33805.9	5714.45
17724.7	14373.9		19531.3	8714.5
8125.73	4305.99		7356.93	23711.3
19126.6	5275.21		11483.2	8947.91
14502	8402.95		2065.21	26004.6
13222.9	13808		20970.4	14306.4
11108.1	10239.1		10693.1	48915.9
17235	10367.2		11099.7	2181.09
13100.6	6601.97		5603.1	22047.4
20233	12335		19823.6	12085.8
5791.38	10327.5		4306.4	13577.6
3201.99	9301.91		36207.2	9906.91
12350.6	12862.2		11638.5	36541.7
7806.4	18657.6		4936.17	21124.1
21436	11166		19446.8	11917.6
4788.63	13522.5		13436.6	18913.8
20368.1	7629.15		15098.1	16088.1
25854.1	9861.1		8360.42	10777.9
19372.7	12882.9		13595.6	10999.4
28171.2	4724.01		8503.59	9191.92
9367.27	14555		9681.26	11956.7
40904.4	15251.6		3181.74	12573.3
10178.2	14158.8		10170.6	31060.8
11387.6	19165.9		20203.1	10477.9
16167.5	2944.58		14714.3	11123.2
9426.27	15635.9		33032.5	9560.2
18404.3	24955		15765.7	15601.8
20308.7	8591.28		13905.4	32893.8
23531.6	9227.08		28970.2	42939.2
17902	11572.7		17140.1	8478.87
55146.1	12801.9		43584.9	23958.4
20476.1	2118.18		18567.6	23417.6
3772.98	15752.3		10769.7	9901.01
19801.8	5774.38		11384.8	11478.1
12223.3	8438.67		11881.1	25021.7
48789.8	13827.6		10093	14702.6
26813.6	12850.6		6805.04	8404.25
5265.73	12794.5		6785.26	12318.9
30477.7	8082.57		7499.25	11250.4
10832.9	7087.93		20870.4	1622.28
40070	10571.2		18998.4	12326.9
17370.7	13283.7		9276.83	1727.71
26467.2	15471.9		4018.68	11160
57060.5	7061.26		8167.36	4588.1
17131.1	7013.81		7583.44	11193.2
23537.3	13222.7		17929.6	6051.91
6705.07	12663.8		9480.3	7763.24
20814.8	4331.11		13069.3
23436.6	14171.2		15472.6
2790.42	2307.23		4655.08
11241	11654.5		7549.26
20110.7	5216.41		3573.79
28301.7	14405.6		4141.86
7726.96	10593.3		1.02204e+06
16786.4	14255.5		8646.23
29930.8	10937.6		9028.78
21091.8	5311.67		5080.89
7171.6	8720.35		15589.1
55953.6	9148.05		10659.4
29544.3	1265.06		5987.87
7833.36	5460.47		10624.6
14248.6	14142		7095.65
14565.8	3714.12		6912.98
13426.4	2351.75		9696.24
5662.21	6483.98		28773.3
5534.64	5422.49		15018.1
2778.34	11943		10827.5
26293.3	13699.7		14520.5
4495.99	15630.5		17466.3
15657.3	18948.5		25975
3616.76	20524		10390.7
7381.56	4859.6		7111.99
20351.9	16419.2		22951.3
27188.4	1682.42		14842.8
14392.5	9660.62		10659.1
14182.3	6296.28		10766.1
9315.9	15841.9		22320.3
19436.2	6059.65		16643.5
8349.53	16446.7		12640.5
29918	4712.11		13149.7
12411.8	7647.55		20019.4
25947.4	10634.2		13969.3
13602.7	6984.14		15405.5
8429.99	11088.3		12091.5
4517.9	5238.18		26097.1
14536	7192.25		10681.4
14787.8	13077.3		13528.3
36293	9136.14		3241.91
20536.4	5659.5		24008.5
7268.36	5729.2		16187.9
7502.23	8837.58		23966.2
26331	4136.56		13654.2
3274.37	10870.1		6629.92
29600	10442.1		19083.9
5075.48	5317.61		22504.2
3976.5	13455.7		10868.4
15562.1	11648.8		25483.3
18666.4	9911.96		16710.4
51504	11852.3		15648.1
20054.2	17754.9		2946.81
36089.6	15125.3		6902.75
20281.5	16019.8		11995
27140.6	9348.76		11218.6
12598.8	11182.5		9783.52
38492.1	2985.76		11275.4
4876.64	13566.4		18578
20583.8	11355.6		29017.3
21262.5	11946.5		8694.21
20822.9	12675.4		12322
14259.8	10214.2		14830.2
9770.64	9946.55		36581.1
17104.7	7218.86		8382.55
6780.46	9755.49		4345.06
6978.18	4076.03		18165.8
22748.5	2237.28		10600.3
43023.1	13676		30456.7
18132.8	8944.99		17700.5
9994.99	5304.64		9941.82
32838	5318.99		4137.96
14147.8	11366.8		14637.1
15412.1	14441		17869.3
18283.7	10712.1		21785.3
21645.8	12414.3		25696
2807.16	9405.49		18631.4
12175.3	8585.71		4737.72
13931.4	8131.87		9465.85
23392.9	11705.3		16393.1
18294.4	6249.64		16323.3
19251.9	9603.85		5971.34
6097.28	16704.8		16015.7
17736.3	9349.07		34588.1
6213.08	10978.2		17408.9
27627	13348.8		16429
20614.9	5400.2		33163.6
9217.49	4278.12		22642.7
10009.4	14144.2		12237
6507.48	9146.98		8157.57
17212.8	7875.47		10422.9
12455.6	7031.78		10555
20649.3	19937.9		5508.33
15952.7	6554.13		26412.8
19908.2	8094.24		10160.3
12728.4	16818.3		13059.6
19066.9	8485.85		4830
17534.9	10047.9		10026.3
3650.98	14652.6		9496.3
13899.3	4765.87		33969.9
5870.42	7831.82		8741.98
13112.6	15559.6		8488.72
25318.2	9572		13749.2
7659.77	19366.7		12680.2
10261.2	12824.5		21977.4
52698.2	2771.64		13174.9
13029.5	14651.8		31230.7
21677.5	12431.1		13141.8
24285.7	7454.81		13677.1
10821.9	12189.8		21178.1
11182.7	6752.34		6333.32
8728.35	11642.7		13820.1
8905.6	6395.05		25616.8
25494.9	19825		16942
14077.8	2787.07		7637.84
6013.26	12548.4		5866.97
27919.4	7110.37		10000.6
14537.6	15007.4		14079.9
11579.6	13230.5		14427
14163.9	8113.41		9589.38
17289.8	12582.5		7164.78
21644.5	11338.1		8846.64
10055.7	3866.8		12027.3
4470.55	11755.6		14859.2
25346.1	12907.7		6036.76
13156.7	3598.42		8522.65
15154.6	16200.1		5260.43
3153.71	5902.14		11207.6
12263.5	6728.98		14569.6
4059.03	5713.82		25267.4
20904.9	13154.7		17009.5
19855.9	3317.06		11333.6
15228.7	11626.7		20188.8
23371.6	8580.39		5694.54
20767.9	11064.1		34951.3
29422.6	4949.79		18063
24763.6	12857.2		8882.72
21259.1	57101		20770.1
12407.9	8576.22		15062.9
19302.1	14490.1		20989.3
31736	13548.8		17153.3
39302.6	1637.4		21629.3
13022.6	4166.85		21478.5
15814.2	3349.28		19130.8
18596.9	5569.9		10062
19448.2	12486.1		18772
19548.3	1927.12		15562.1
60282.1	8526.65		14488.2
9085.87	12487.5		6814.2
15518.5	1854.95		8014.12
34366.4	1842.46		20115.5
17380	1840.51		8414.95
13227.3	25895.6		46099.9
15116.4	2120.85		11262.7
18016.4	2278.44		28983.8
46432.4	1230.47		29373.9
20903.8	2081.85		9182.03
20104.9	7773.71		21759.8
31637.9	13660.8		63135
33041.1	9009.74		11940.7
24840.8	17811.7		35564.2
20143.8	2252.98		6619.71
18621.7	10174.8		13325.9
15949.1	13954.2		21995.3
5451.92	6453.55		30706.2
26410.9	13743.7		7516.82
8414.89	3281.28		22014.8
23192	12385.3		12898.5
23416.7	13085.7		5897.02
13106	7660.53		13157.8
15199.8	1856.02		19836.1
13854	3723.41		18158.4
19382.3	1790.93		3780.62
26217.9	8644.61		15966.4
18012.7	13812.5		31250.8
12740.1	12040.8		12033.2
32207.2	11869.9		37568.9
25690.7	2108.21		10600.9
6519.14	1480.8		15232.5
22613.1	3031.28		11903.8
8848.69	13962.3		5076.65
10775.5	1412.27		9420.64
13399.5	11590.7		14357.9
7194.86	2150.97		7486.57
14314.7	2183.22		17397
35280.8	1373.11		9248.69
33452.9	1806.79		70700.3
16230.3	1174.69		13274.1
20509.5	1823.2		19649.1
10186.2	10157.3		8267.74
18383.3	1235.65		31417.4
25198.4	2327.4		2959.64
17413	1627.41		26879.3
28333.8	12637.7		2701.28
4643.05	14006.3		32901.9
25186.8	1231.28		18627.5
16821.4	3261.65		39948.3
23665.3	6532.92		16237.7
33457.2	20714.9		46774.4
15107.5	8679.43		49871.1
7364.95	6853.18		48866.3
12607.6	1958.67		65730.5
21690.1	1283.75		13099.5
12644	22170.9		2851.41
19344.9	4386.04		17269.6
23558.3	7251.36		10602.7
29920.9	4216.35		49496
2646.81	1678.5		6532.32
19605.3	8477.71		23294.9
22292.6	10036.8		14648.8
27565	4440.46		40641.5
19220.1	12548.4		13714.2
11743.8	7104.12		17530.7
26630.7	6762.27		40473
15253.9	4231.42		17785.3
17014	6909.77		9841.03
5858.25	8835.79		4166.93
23027	8634.55		30074.8
9265.05	5528.64		34308.4
31431.7	12636.1		11797.3
13303.1	9396.68		12611.3
15145.8	10620.4		19180.7
12822.4	14944.3		39767.4
23006.3	2558.77		18983.9
4893.4	7254.1		7631.91
6942.98	23879.7		30093.4
21929.9	6194.67		29291.7
8243.38	13757.5		34009.8
7361.5	5630.73		17024.2
3897.64	1801.43		34443.5
8685.07	11857.7		14342.8
4972.76	18614.7		43105.2
12020.8	1323.15		11383.8
4495.78	13634.3		7321.8
22992.7	8034.93		21198.4
8934.84	2182.09		301899
20885.8	3087.41		7440.23
3775.76	10269.9		19539
13345.7	7714.11		7026.62
5659.19	12408.3		15018.5
9892.77	13011.4		6952.14
8691.56	2680.24		2328.9
18769.9	15355.9		46545.4
284712	6760.14		10460
25906.8	13883.9		15875.6
35158.1	13821.3		19770.3
7974.39	12560		7809.98
2743.05	6306.4		15963.2
21141.8	10887.9		19637.8
7438.27	13373.7		17901.3
16006.3	8409.84		15215
5747.78	9570.48		32942.1
12842.5	14869.2		12859
9639.37	8223.24		5668.8
16155.1	7574.77		19881.9
6873.03	8046.08		29389
18706.6	13437.5		38677.1
3760.56	7601.9		21406.1
17542.4	9098.86		36822.4
18705	20432.8		20751.2
25276.1	12034.2		54241.2
8854.18	5198.95		12897.4
6573.74	7935.58		8409.48
8066.38	4127.99		35140.7
42646	2782.65		16614.8
29167.1	8229.88		4152.12
5730.12	10070.7		18098.1
17103.4	11437.7		14004.6
16640.8	3267.46		13476.1
10309.3	11762.2		20665.6
9009.35	2696.61		22670.8
12089.3	14978		7696
20652	31772.3		16837.5
12567.2	2847.1		11350.8
10172.5	4565.5		13450.5
13219.9	4648.58		11556.5
11150.4	6955.62		3116.4
28695.4	14787.6		5133.61
15046.9	5395.72		21683.4
15402.3	5119.55		19164.2
16435.7	1844.78		9150.38
11924.8	13281.2		14730
21234.9	77190.1		21471.4
26934.5	8090.01		15440.4
21754	9525.53		5339.05
5409.93	14922.7		9018.09
18212.1	13851.2		30208.9
14541.4	43476.1		18898.6
9352.49	32699.1		11978.9
7585.87	5603.25		8677.43
14586.5	8822.9		28512.2
11306	5432.05		8659.12
16535.1	2731.63		19678.2
8629.26	6576.88		21715
16122.3	20834.4		33348.9
9004.23	9705.52		5812.7
20970.6	8517.9		4085.81
32954.7	3483.44		40316.6
17406.5	9327.79		18855.6
15810.7	14355		20304.5
13526.9	3660.2		30128.3
8171.79	5196.84		34145.2
14976.6	1392.93		14501.5
25568.6	11225.4		11257
21637.9	6364.3		11434.4
23375.6	9462.68		3590.89
13324	12178.5		17007.7
13854	2954.17		33129.9
9128.41	8224.55		6353.14
19983.4	7698.24		66886.4
32558.3	3827.44		18931.8
14697.9	8673.42		13662.3
18216.2	8117.54		32733.8
3332.36	16838.8		13827.4
446627	38784.6		15825.5
31026.8	4549.58		21606.2
11028.9	6712.45		48912.8
16365.9	1835.29		295637
25822.3	11405		21886.3
22569.5	15479.7		8920.1
8699.37	8964.55		16649.7
25274.8	5941.65		16910.9
25366.7	13618.8		20074.5
14497.6	5732.69		35409.3
23181.7	11568.9		278531
8315.4	5330.07		10968.1
11450.2	7431.37		22156.9
21224.7	11868.8		11443.6
28917.7	1691.33		3489.19
16027.5	12752		13280.5
26712.7	3837.65		11759.8
16113.1	1918.79		10977.7
17612.6	4375.63		6548.48
17103.4	3057.09		56187
9592.6	8970.73		17381.9
17082.9			4572.7
25185.3			163541
21845.6			19594.3
10540.8			19034
13019.3			2943.1
18393.7			34502.5
7169.02			2210.56
20370			9590.07
7467.96			19831.5
6634.51			18348.6
10678.8			39474.1
15315.5			8003.32
3947.36			14446
10811.9			7212.58
29683.1			15455.1
8624.71			39427.4
18073.6			22151.2
23380.6			6637.37
11895			7257.97
6885.29			16157.1
9111.45			23193.7
13063.7			285051
5775.92			9867.05
8723.03			10917.3
18180			44629.2
3597.02			16992.7
10384.8			19899.6
6415.22			29708.2
15969.8			42538.5
3790.6			6879.95
19851.7			37774.9
19025.4			16125.4
6316.13			8668.21
7793.47			20633.9
4419.81			8230.78
5831.07			6316.73
6456.81			24099.3
3757.99			21836.7
3581.99			19369
11789.8			19442.4
7163.22			10423.4
3536.28			14307.3
12930			12265.7
5784.59			15432
3465.04			29695.6
9278.86			33183.1
4436.36			16565.8
13371.8			11198.6
11339.6			18699
7595.79			14138.7
9268.44			69781.4
4580.61			13224.6
5315.22			10684.7
3439.73			11081.5
13685.5			16394.2
3299.7			9346.46
8230.83			9038.76
5118.03			21876.3
7091.94			17418.1
3389.49			29437.7
9542.45			13994.2
8543.4			16033.1
12717.2			15052.9
3732.4			4653.66
30664.2			5530.65
6951.54			15814.4
10667.2			7326.03
12850.7			43149.5
6794.15			8429.66
5578.11			18739.8
12873.9			10173.4
32479.6			16149.3
7987.01			609505
9571.32			9902.12
8154.27			24420.2
9037.15			17750.3
9504.19			13707.8
5559.58			33178.8
16642.9			24302.3
9008.84			14987.7
4551.47			78969.2
6689.62			10596.9
9447.16			27718.5
12504.8			11288.1
10397.9			47121.6
4277.71			14812.1
7805.18			7027.57
9137.96			39889
16425.2			16125.8
4335.66			24811.4
17530.2			52904.4
4967.83			2960.02
14494.1			10353.5
5668.69			29233.4
17396.9			17099.6
7129.41			9905.11
12153.2			13129.6
8831.7			6774.46
29160.3			10092.9
3562.87			15024.2
4737.3			24291.4
2663.09			12965.5
8293.63			27674.3
3935.79			24280.4
3260.64			20026.4
4986.42			41028.5
11501.1			19883.4
3436.86			18359.7
15880.9			19749.1
24821.9			21142.8
16245.1			9387.11
8539.73			8151.77
4172.1			23002.3
8089.47			41911
11785.2			12510.9
5969.61			15103.9
17079.4			10437.3
3401.37			30168.4
10788.6			18954.6
6933.36			18807.4
6764.46			7638.97
21663.6			22046.6
13831.7			9862.77
4346.78			16377.8
3510.12			15394.3
7119.61			8690.97
3944.51			77994.4
6928.36			19079.5
5011.34			25478.7
11974.2			19757.9
9251.79			30294.1
14220.3			15516.4
11471.4			15381
12376.7			22880.9
5939.91			9579.59
13293.9			22317.8
6421.17			18869.6
12526.5			5742.48
9065.83			26739.2
16426.2			21843.1
15828			8498.26
5723.46			4337.66
11493.2			14801.4
7021.26			21941.9
14406			22325.6
25318.3			20214
4265.19			20439.7
4711.3			11896.2
3904.64			28067.9
15418.9			9925.66
6885.21			10308.4
9110.76			29113.2
13996			3949.03
5764.66			36245
4522.04			13770.8
11710.8			7440.44
8396.38			17600
8850.08			19028.7
10537.6			18973.7
2440.12			7023.34
9551.83			15606.3
5062.82			36078.6
7543.87			9395.2
4444.48			7930.39
3632.52			19840.2
3505.27			20277.4
18662.7			12285.7
10902.9			15820.2
5192.03			13767.3
20356			11030.9
11906			26573.5
9776.48			16909.4
13631.4			7440.17
7509.4			126523
9410.83			16614.9
12927.2			16609
11170.3			6555.57
8227.59			12157.8
8367			16078.2
5778.77			15645.3
6166			13442.6
22698.9			10811.3
7865.34			16743.5
10588			15743.4
4678.9			14903
19570			11670.5
6343.72			10151.8
3316.62			13059
21974.1			4441.04
8628.49			5263.19
6282.31			11481.8
7180.94			17664
10522.7			17600.3
3111.87			19767.5
3394.6			17397.6
15460			10233.2
[truncated: 2,069 more rows]
