# Supplementary material for: Principles of RNA recruitment to viral ribonucleoprotein condensates in a segmented dsRNA virus
Source: eLife. 2023 Jan 26;12:e68670. doi: 10.7554/eLife.68670 (PMC9925054; doi:10.7554/eLife.68670)
Supplement: Figure 3—source data 1. — (e) Unimodal distribution of kon values calculated for single Seg3 transcripts detected at 2 hpi. The resulting average kon value calculated from a Gaussian fit is 10–5 (Ms)–1, corresponding to a single Seg3 transcript. (f) Estimated numbers of Seg3 transcripts (mean ± SD) at 4 hpi and 6 hpi are 24±12 (x̃=21) and 53±36 (x̃=42), respectively. N=245 (2 hpi), N=515 (4 hpi), N=1181 (6 hpi). Scale bars, 5 µm (b), 500 nm (c). [file elife-68670-fig3-data1.xlsx]

## Sheet: Fig3d
2 hpi	4 hpi	6 hpi
0.104	47.474	81.07
0.673	28.815	86.996
1.378	35.948	82.002
0.873	27.091	56.139
1.662	25.102	44.299
0.542	26.574	61.104
1.405	21.661	46.325
0.971	17.887	71.832
0.85	32.615	160.379
1.001	20.471	80.908
0.803	22.441	98.698
0.844	12.473	85.967
0.997	16.833	78.114
10.157	20.619	100.334
0.461	20.72	102.566
0.878	19.491	79.508
0.924	36.545	106.294
1.629	34.435	97.232
1.218	25.101	80.758
2.017	23.465	46.12
1.065	17.597	54.069
1.017	21.794	61.676
0.759	26.724	204.264
1.4	19.537	65.941
1.004	32.676	63.144
1.214	23.793	71.173
2.213	19.867	43.354
0.852	17.185	42.544
1.365	26.789	24.237
1.457	26.874	50.486
1.452	26.095	35.863
1.306	24.685	39.854
0.796	36.429	87.067
0.96	19.708	107.647
0.814	31.726	163.296
0.942	22.406	104.911
1.767	20.89	37.897
1.245	24.553	97.335
1.109	31.09	124.867
0.867	26.651	69.303
1.089	51.731	122.247
1.18	36.032	106.956
1.845	27.313	111.336
1.833	29.627	53.472
1.308	24.517	66.695
1.149	30.427	69.161
1.15	40.031	103.426
1.44	31.739	108.108
1.124	32.831	117.944
0.917	34.523	181.984
4.181	20.844	163.471
0.923	34.285	46.762
1.036	24.616	126.173
1.527	21.115	39.657
0.824	23.778	66.832
1.109	27.573	53.14
1.376	38.442	62.698
0.84	26.6	92.427
0.857	24.147	89.547
0.956	64.655	101.029
1.021	63.595	139.124
1.28	31.37	114.54
1.093	18.321	111.064
0.842	24.898	104.24
0.732	19.496	134.099
0.977	33.625	166.533
1.027	42.513	66.963
0.841	28.192	111.714
1.301	37.005	28.61
0.597	27.031	27.336
1.039	31.308	150.074
0.867	38.043	159.635
0.832	63.49	68.852
0.761	12.695	72.209
1.033	16.984	119.202
0.817	27.251	54.863
0.852	58.075	26.139
1.048	47.983	27.607
1.256	22.362	30.774
0.746	46.906	55.981
1.349	51.428	70.41
1.162	25.238	35.707
0.817	18.402	64.36
1.048	42.755	45.594
1.187	31.646	114.867
0.809	25.563	66.389
0.857	23.935	102.826
0.818	30.527	72.429
0.959	22.14	94.471
1.346	23.288	145.617
1.001	20.611	104.568
0.744	26.701	186.569
1.052	20.502	61.917
0.958	33.68	102.227
0.932	25.718	57.182
0.687	23.67	75.585
1.23	49.433	86.428
1.098	24.682	57.585
1.197	26.538	138.934
1.677	23.32	93.404
1.159	29.168	153.189
0.643	51.023	48.974
0.649	28.038	129.032
1.191	19.809	190.803
0.893	17.646	155.636
0.848	38.414	210.669
1.166	54.951	97.154
1.13	18.548	67.478
1.269	12.216	61.508
1.495	34.14	154.656
0.567	18.648	106.738
1.446	27.097	60.813
1.491	17.49	62.223
0.856	31.084	134.204
1.077	39.955	66.046
1.151	30.061	39.545
0.803	24.119	51.702
1.203	22.254	70.709
0.836	28.184	29.813
1.467	73.441	30.184
0.901	32.729	64.839
0.55	24.325	132.371
0.916	32.935	70.968
0.511	17.554	65.216
1.329	30.979	102.99
0.987	37.775	33.115
0.875	27.036	89.639
0.86	44.325	167.515
0.969	72.707	83.432
0.983	29.296	167.062
1.112	33.51	153.301
1.058	29.004	94.604
1.058	30.022	110.391
0.84	31.405	108.774
1.27	33.098	100.567
1.209	32.385	68.147
0.928	64.636	138.534
0.682	19.067	96.8
0.845	37.56	87.898
1.236	24.124	158.116
1.035	23.431	81.068
1.328	31.766	137.467
0.808	44.225	78.288
1.42	29.155	17.768
1.059	26.67	36.67
4.212	36.754	29.318
0.726	26.149	46.219
0.652	40.377	47.975
1.405	21.727	55.282
0.905	33.208	26.081
0.811	25.195	83.811
1.191	32.307	65.463
0.892	16.58	27.099
1.203	34.9	25.601
0.919	22.547	78.643
1.039	30.041	66.495
1.071	20.314	52.589
1.124	37.461	19.141
1.111	17.283	42.696
1.042	24.847	44.784
1.012	30.497	56.513
0.973	23.34	32.286
0.582	27.784	16.275
0.538	30.278	14.381
1.045	27.968	65.19
0.823	25.61	35.082
0.409	33.428	71.36
1.235	22.198	24.408
0.656	19.287	25.619
0.883	22.318	23.112
0.664	32.89	25.812
0.691	26.785	52.752
1.264	28.624	121.217
0.832	16.244	105.393
1.13	33.503	16.419
1.259	24.25	28.675
1.036	40.277	36.786
1.158	15.066	17.381
1.392	25.715	27.839
0.756	19.483	37.231
0.933	12.444	35.529
1.193	18.029	35.142
0.973	12.101	81.594
1.272	12.846	38.263
0.683	12.359	20
1.106	16.075	47.577
0.955	19.39	41.713
0.925	18.346	25.181
0.944	13.901	31.351
1.073	13.906	35.708
1.225	15.075	22.251
1.074	10.529	61.13
0.941	11.619	78.755
1.02	15.484	30.384
0.932	15.152	36.222
1.081	12.196	34.826
1.63	11.977	21.997
0.819	18.723	33.208
0.546	16.722	39.084
1.184	16.955	16.541
1.398	21.094	28.253
1.295	25.279	97.768
0.803	11.566	66.806
1.292	17.387	37.038
0.806	10.325	28.711
1.493	12.233	70.763
1.081	12.927	17.266
1.563	13.983	46.431
1.144	12.436	47.431
0.824	13.168	57.814
1.031	9.547	65.826
1.495	19.656	29.896
1.425	32.66	43.783
0.589	11.856	24.821
1.607	17.753	44.903
0.632	18.533	26.767
0.693	19.677	16.48
0.779	11.145	72.684
0.801	13.086	90.408
1.106	12.23	39.422
0.712	20.916	16.738
0.789	9.105	19.173
1.151	9.038	43.248
0.628	37.048	13.318
0.444	17.675	36.773
0.773	12.624	51.443
1.202	7.611	69.71
1.707	15.851	24.577
2.351	22.519	49.461
0.94	20.984	55.481
0.512	7.702	41.688
1.46	12.997	20.804
2.473	29.24	23.609
1.265	17.398	14.885
1.357	10.891	38.638
0.71	21.934	20.492
0.695	12.585	41.898
0.679	13.935	41.566
1.547	11.872	45.236
0.836	31.581	37.695
1.147	20.713	26.17
1.624	17.478	55.095
0.735	12.843	22.186
1.481	20.074	42.444
0.67	13.235	84.439
	22.057	16.942
	19.754	46.132
	9.77	54.99
	14.773	26.123
	19.996	17.47
	18.834	36.85
	15.334	36.784
	17.672	26.9
	11.061	49.456
	10.522	27.556
	17.823	18.399
	19.347	29.035
	16.152	57.706
	13.67	35.561
	13.695	61.258
	39.467	59.913
	16.678	35.348
	12.339	13.773
	19.68	43.07
	20.588	34.733
	21	28.973
	25.159	45.343
	23.731	14.285
	16.701	37.209
	20.649	78.435
	25.008	21.02
	13.081	31.978
	12.979	22.622
	9.913	29.139
	17.844	14.231
	18.345	19.836
	14.277	33.685
	24.468	60.71
	8.728	39.952
	11.69	37.586
	10.952	57.541
	11.302	26.847
	26.34	138.095
	16.41	64.298
	17.94	68.697
	28.026	25.231
	35.884	33.254
	16.651	122.886
	16.643	73.388
	17.28	29.289
	25.818	29.385
	23.472	80.404
	21.426	168.01
	19.385	31.418
	15.08	26.681
	25.698	50.667
	20.264	134.851
	13.576	39.436
	21.186	40.092
	10.854	82.251
	15.757	44.229
	11.867	29.139
	16.171	24.069
	14.258	30.198
	19.677	29.305
	15.219	189.971
	10.789	24.304
	20.912	77.076
	38.45	41.893
	16.374	91.824
	17.739	61.525
	26.561	22.322
	25.777	51.82
	13.599	30.241
	16.597	49.434
	16.625	52.811
	22.892	25.384
	41.067	28.334
	8.011	53.939
	21.209	25.236
	15.444	35.609
	17.723	27.617
	21.902	61.833
	36.964	34.829
	17.384	54.396
	25.237	77.696
	23.718	44.085
	11.527	31.384
	19.833	38.016
	34.009	49.97
	20.104	34.515
	27.24	61.119
	28.514	48.344
	22.313	61.934
	17.869	38.244
	26.648	38.982
	23.352	48.086
	19.026	38.516
	27.197	48.713
	17.922	53.343
	22.55	77.359
	16.216	51.727
	21.25	36.829
	21.166	28.262
	26.567	43.374
	20.296	37.694
	24.487	20.062
	31.749	58.556
	17.488	67.857
	15.873	26.064
	14.369	47.897
	20.749	76.662
	19.11	29.665
	32.264	19.647
	29.987	30.889
	24.281	18.894
	13.908	55.333
	26.987	86.807
	18.183	62.424
	15.331	39.253
	25.203	54.723
	18.465	42.13
	27.046	78.035
	60.465	49.191
	29.485	14.5
	15.651	28.084
	16.37	36.801
	16.723	68.788
	38.339	53.961
	17.168	249.565
	19.214	207.808
	17.528	167.776
	29.736	41.328
	29.771	33.579
	16.96	31.139
	37.347	15.635
	16.007	87.33
	22.67	39.528
	14.861	46.209
	20.501	33.882
	18.141	33.818
	11.911	13.973
	15.593	54.16
	16.093	111.09
	6.895	26.039
	20.015	52.05
	23.635	36.022
	25.869	22.067
	18.479	26.882
	43.292	63.307
	14.165	40.925
	17.797	48.571
	15.252	136.516
	15.978	18.113
	22.44	23.742
	17.508	32.571
	34.532	34.349
	21.352	49.117
	15.483	78.516
	26.047	59.364
	47.421	48.402
	36.691	42.218
	24.131	19.442
	22.279	53.045
	36.123	26.574
	30.672	23.883
	14.138	30.681
	30.237	30.275
	25.186	79.867
	24.323	81.961
	18.437	100.072
	9.979	22.73
	26.062	60.971
	15.279	35.054
	23.284	39.137
	13.568	19.911
	15.168	15.619
	18.537	49.914
	17.627	47.256
	15.132	20.809
	9.304	24.894
	13.964	94.633
	15.034	156.773
	16.943	77.87
	12.406	86.819
	37.919	77.117
	24.492	28.354
	20.57	60.263
	4.19	15.273
	19.172	35.141
	23.384	40.521
	45.788	60.488
	8.855	39.171
	17.619	119.758
	24.421	115.627
	20.293	20.63
	16.782	49.182
	19.335	49.432
	23.487	47.257
	8.807	36.89
	42.914	53.132
	20.764	159.748
	22.231	34.844
	18.08	42.601
	39.996	14.646
	58.432	14.55
	54.575	20.929
	8.962	44.453
	14.577	55.46
	17.109	33.646
	16.815	58.427
	7.46	87.263
	5.978	222.532
	14.472	81.238
	25.354	52.578
	17.026	34.841
	23.679	26.499
	18.789	35.963
	39.538	36.484
	17.349	18.57
	15.852	24.327
	13.748	49.626
	51.218	65.731
	31.98	104.099
	11.852	73.194
	51.948	116.871
	20.952	167.565
	18.853	158.244
	7.746	84.476
	15.359	52.857
	58.795	16.042
	16.656	187.132
	17.171	53.263
	15.996	65.767
	22.932	198.272
	10.187	37.562
	23.608	14.216
	13.452	45.513
	18.795	36.437
	30.554	72.147
	11.832	54.806
	27.061	18.515
	15.079	18.445
	16.037	124.102
	17.163	79.996
	16.693	79.719
	14.635	34.44
	18.014	72.13
	15.588	40.946
	16.193	78.026
	23.244	69.9
	22.004	59.131
	20.008	35.055
	41.908	58.076
	20.977	42.864
	17.521	18.935
	34.868	29.286
	17.262	15.1
	17.947	78.582
	42.151	16.693
	16.989	90.634
	22.619	27.447
	26.796	74.278
	24.068	196.267
	11.131	30.813
	37.662	26.096
	17.188	15.966
	13.081	73.105
	34.805	78.312
	35.874	70.678
	25.807	91.114
	29.909	98.182
	29.974	107.352
	32.596	133.575
	119.158	60.89
		95.073
		42.404
		19.015
		18.148
		22.652
		27.164
		26.681
		34.81
		20.777
		74.399
		98.602
		91.913
		56.51
		19.263
		44.185
		28.517
		21.796
		30.233
		67.682
		26.871
		37.182
		19.969
		36.328
		58.702
		33.562
		17.322
		44.823
		94.067
		74.278
		106.746
		30.812
		56.783
		28.764
		80.182
		179.379
		31.632
		15.117
		30.064
		41.157
		29.991
		32.598
		126.781
		47.13
		79.574
		79.403
		131.254
		19.609
		20.683
		19.453
		48.014
		44.47
		18.948
		45.336
		65.238
		32.91
		15.841
		52.882
		25.065
		21.99
		104.569
		91.246
		37.999
		21.016
		25.907
		14.736
		25.558
		54.214
		32.757
		18.04
		46.056
		32.317
		64.249
		14.982
		35.946
		13.782
		52.255
		38.116
		23.747
		113.907
		47.902
		14.441
		51.509
		30.922
		15.272
		98.287
		31.881
		52.562
		17.054
		37.24
		45.715
		24.611
		117.146
		151.375
		88.581
		31.606
		21.006
		22.939
		186.564
		51.293
		115.157
		16.11
		51.57
		23.221
		41.404
		195.396
		30.125
		39.164
		113.497
		131.56
		32.456
		38.754
		15.762
		33.566
		22.77
		36.215
		15.597
		63.099
		20.432
		114.959
		114.98
		106.059
		124.436
		16.387
		45.587
		48.739
		39.617
		44.419
		53.402
		119.986
		14.369
		22.323
		32.256
		26.512
		15.808
		64.271
		79.903
		55.159
		80.146
		124.871
		61.575
		51.5
		29.175
		56.85
		109.351
		59.271
		35.193
		106.203
		26.882
		43.645
		47.844
		38.031
		21.784
		14.798
		32.345
		30.24
		111.146
		33.097
		46.423
		74.038
		101.981
		14.867
		21.023
		21.238
		69.918
		65.128
		34.938
		24.218
		15.006
		24.524
		36.021
		78.549
		23.936
		35.461
		16.502
		76.15
		38.863
		32.012
		21.208
		53.238
		26.955
		56.469
		52.515
		94.271
		27.313
		22.548
		35.15
		26.107
		79.641
		259.555
		14.579
		40.268
		21.632
		44.395
		129.952
		41.224
		40.479
		22.401
		54.371
		39.469
		68.406
		55.434
		59.089
		30.739
		28.291
		17.453
		62.136
		24.536
		19.1
		33.95
		32.313
		93.754
		33.019
		47.221
		43.98
		63.816
		33.137
		39.759
		34.473
		34.227
		48.596
		22.605
		196.356
		13.707
		13.606
		17.24
		81.814
		34.093
		22.693
		34.085
		51.477
		50.111
		15.571
		54.15
		34.846
		22.134
		32.57
		123.993
		78.968
		167.151
		66.537
		92.426
		27.622
		37.786
		20.206
		57.803
		26.63
		29.439
		30.619
		17.351
		26.91
		41.91
		46.539
		69.644
		35.301
		37.702
		23.132
		24.842
		25.616
		42.304
		91.299
		139.843
		46.034
		24.431
		202.4
		45.609
		13.652
		55.086
		30.975
		44.121
		13.398
		29.24
		18.112
		50.062
		35.714
		42.123
		43.126
		37.293
		35.112
		29.012
		24.578
		67.453
		65.695
		24.86
		95.622
		52.694
		42.688
		88.06
		94.139
		58.805
		14.613
		82.87
		21.224
		83.475
		100.711
		33.101
		23.02
		71.387
		44.914
		31.309
		91.625
		34.984
		16.533
		24.81
		49.422
		57.155
		63.269
		15.251
		75.933
		33.274
		53.28
		32.089
		26.203
		34.844
		40.25
		22.776
		47.122
		35.621
		24.737
		94.34
		20.169
		31.246
		24.42
		31
		23.033
		32.049
		30.834
		38.039
		40.638
		44.302
		57.078
		51.211
		58.545
		29.673
		17.901
		27.041
		28.103
		19.757
		21.464
		38.393
		18.278
		27.292
		48.467
		39.268
		33.266
		39.349
		56.516
		63.779
		51.192
		57.357
		62.747
		54.222
		113.56
		42.628
		32.561
		36.002
		29.061
		28.379
		31.187
		62.112
		17.017
		50.384
		101.438
		59.431
		18.4
		18.044
		27.765
		100.609
		37.951
		42.119
		40.412
		31.114
		25.863
		49.49
		38.138
		53.692
		46.793
		23.364
		38.36
		42.048
		25.638
		36.125
		46.873
		105.569
		30.126
		46.411
		52.853
		40.352
		30.511
		69.588
		17.039
		86.112
		50.479
		42.807
		53.414
		47.535
		29.643
		23.821
		59.177
		14.708
		51.391
		33.867
		26.593
		43.584
		36.391
		28.123
		30.71
		70.073
		35.922
		65.494
		28.111
		30.577
		57.146
		21.607
		34.306
		47.452
		28.738
		53.157
		40.177
		102.824
		59.358
		44.174
		33.925
		74.315
		28.35
		41.947
		52.583
		26.196
		37.378
		15.401
		45.313
		20.238
		58.525
		22.153
		15.048
		41.825
		27.24
		51.45
		30.294
		24.048
		23.325
		54.51
		65.13
		49.227
		47.219
		87.699
		28.897
		44.39
		21.087
		31.702
		39.202
		44.853
		43.94
		21.162
		21.918
		19.132
		32.897
		48.35
		38.14
		26.259
		39.269
		42.501
		50.5
		37.204
		33.702
		32.256
		44.547
		44.134
		63.631
		32.479
		37.387
		19.985
		33.854
		45.037
		58.351
		29.898
		34.214
		34.677
		19.486
		44.596
		118.314
		38.952
		42.677
		29.226
		67.437
		27.192
		41.592
		21.152
		103.729
		30.089
		52.118
		32.59
		36.319
		43.919
		41.531
		41.557
		21.381
		58.355
		17.787
		73.104
		32.842
		35.436
		20.724
		93.277
		68.727
		51.511
		34.351
		48.669
		38.576
		40.186
		49.814
		33.852
		35.626
		24.811
		41.577
		84.126
		62.634
		98.96
		70.026
		26.036
		65.564
		36.4
		31.987
		45.424
		30.758
		25.942
		62.957
		47.416
		27.294
		37.245
		32.728
		26.472
		50.469
		14.664
		18.765
		41.208
		33.871
		30.115
		47.886
		20.858
		29.521
		47.155
		58.215
		49.034
		31.205
		43.881
		39.314
		47.256
		35.925
		23.616
		42.631
		52.97
		62.374
		19.314
		33.522
		19.386
		33.441
		57.661
		36.974
		79.354
		25.431
		34.127
		33.01
		23.694
		35.808
		32.823
		28.811
		22.334
		20.23
		26.417
		35.552
		68.075
		17.371
		67.977
		48.607
		68.068
		58.517
		53.087
		41.854
		22.604
		20.037
		21.497
		20.868
		13.239
		44.312
		55.834
		40.561
		21.773
		30.406
		25.909
		52.175
		33.037
		54.183
		46.731
		53.466
		30.253
		53.741
		51.671
		37.342
		13.651
		33.313
		54.896
		29.036
		25.785
		48.571
		54.001
		22.882
		20.807
		50.265
		112.216
		44.937
		22.106
		37.704
		44.223
		49.167
		50.591
		32.341
		29.519
		15.809
		22.353
		28.455
		32.422
		17.848
		43.622
		39.501
		24.474
		45.143
		100.662
		60.063
		39.13
		46.233
		60.627
		16.753
		48.681
		13.604
		32.738
		19.431
		14.48
		27.057
		24.251
		32.204
		26.151
		50.65
		43.125
		44.77
		29.854
		40.338
		34.734
		17.746
		69.054
		109.191
		46.181
		32.237
		49.056
		38.804
		39.162
		39.102
		40.603
		21.246
		21.079
		32.406
		39.873
		22.374
		26.723
		50.77
		52.342
		27.376

## Sheet: Fig3e
2 hpi
0.104
0.673
1.378
0.873
1.662
0.542
1.405
0.971
0.85
1.001
0.803
0.844
0.997
10.157
0.461
0.878
0.924
1.629
1.218
2.017
1.065
1.017
0.759
1.4
1.004
1.214
2.213
0.852
1.365
1.457
1.452
1.306
0.796
0.96
0.814
0.942
1.767
1.245
1.109
0.867
1.089
1.18
1.845
1.833
1.308
1.149
1.15
1.44
1.124
0.917
4.181
0.923
1.036
1.527
0.824
1.109
1.376
0.84
0.857
0.956
1.021
1.28
1.093
0.842
0.732
0.977
1.027
0.841
1.301
0.597
1.039
0.867
0.832
0.761
1.033
0.817
0.852
1.048
1.256
0.746
1.349
1.162
0.817
1.048
1.187
0.809
0.857
0.818
0.959
1.346
1.001
0.744
1.052
0.958
0.932
0.687
1.23
1.098
1.197
1.677
1.159
0.643
0.649
1.191
0.893
0.848
1.166
1.13
1.269
1.495
0.567
1.446
1.491
0.856
1.077
1.151
0.803
1.203
0.836
1.467
0.901
0.55
0.916
0.511
1.329
0.987
0.875
0.86
0.969
0.983
1.112
1.058
1.058
0.84
1.27
1.209
0.928
0.682
0.845
1.236
1.035
1.328
0.808
1.42
1.059
4.212
0.726
0.652
1.405
0.905
0.811
1.191
0.892
1.203
0.919
1.039
1.071
1.124
1.111
1.042
1.012
0.973
0.582
0.538
1.045
0.823
0.409
1.235
0.656
0.883
0.664
0.691
1.264
0.832
1.13
1.259
1.036
1.158
1.392
0.756
0.933
1.193
0.973
1.272
0.683
1.106
0.955
0.925
0.944
1.073
1.225
1.074
0.941
1.02
0.932
1.081
1.63
0.819
0.546
1.184
1.398
1.295
0.803
1.292
0.806
1.493
1.081
1.563
1.144
0.824
1.031
1.495
1.425
0.589
1.607
0.632
0.693
0.779
0.801
1.106
0.712
0.789
1.151
0.628
0.444
0.773
1.202
1.707
2.351
0.94
0.512
1.46
2.473
1.265
1.357
0.71
0.695
0.679
1.547
0.836
1.147
1.624
0.735
1.481
0.67

## Sheet: Fig 3f
4 hpi	6 hpi
47.4738	81.07
28.8145	86.9956
35.9484	82.0024
27.0912	56.1388
25.1021	44.2993
26.5738	61.1037
21.6607	46.3247
17.8866	71.8321
32.6147	160.379
20.4712	80.9079
22.4408	98.6981
12.4735	85.967
16.8329	78.1137
20.6186	100.334
20.7199	102.566
19.4911	79.5083
36.5452	106.294
34.4349	97.2322
25.1011	80.7578
23.4653	46.1199
17.5967	54.0692
21.7944	61.6762
26.7237	204.264
19.5368	65.9409
32.6756	63.1442
23.7933	71.1725
19.8667	43.3536
17.1854	42.5444
26.7895	24.2369
26.8742	50.4856
26.0954	35.8628
24.6849	39.8539
36.4289	87.0669
19.7075	107.647
31.7262	163.296
22.4063	104.911
20.8896	37.8971
24.5528	97.3352
31.0903	124.867
26.6511	69.3031
51.7314	122.247
36.0322	106.956
27.3132	111.336
29.6273	53.4722
24.5166	66.6949
30.4269	69.1615
40.0312	103.426
31.7392	108.108
32.8307	117.944
34.5227	181.984
20.8438	163.471
34.2845	46.7621
24.6164	126.173
21.115	39.6575
23.7781	66.8318
27.5731	53.1397
38.4416	62.6977
26.6003	92.4266
24.147	89.5471
64.6553	101.029
63.5949	139.124
31.3696	114.54
18.3208	111.064
24.8978	104.24
19.4956	134.099
33.6252	166.533
42.5125	66.9634
28.1916	111.714
37.0053	28.6097
27.0314	27.336
31.308	150.074
38.0426	159.635
63.4903	68.8521
12.6948	72.2093
16.9836	119.202
27.2514	54.8633
58.0751	26.1393
47.9832	27.6075
22.3624	30.7742
46.9057	55.9807
51.4275	70.4099
25.2379	35.7067
18.4025	64.3604
42.7547	45.5938
31.6462	114.867
25.5628	66.3887
23.9351	102.826
30.5271	72.4287
22.1396	94.4713
23.2881	145.617
20.611	104.568
26.7009	186.569
20.502	61.9168
33.6796	102.227
25.7178	57.1816
23.6699	75.585
49.4335	86.4279
24.6823	57.5847
26.5381	138.934
23.3199	93.4038
29.1675	153.189
51.0231	48.9743
28.0384	129.032
19.8093	190.803
17.6458	155.636
38.4144	210.668
54.9506	97.154
18.5484	67.4781
12.2158	61.5079
34.1397	154.656
18.648	106.738
27.0968	60.813
17.49	62.2225
31.084	134.204
39.9555	66.0459
30.0611	39.5454
24.1188	51.7021
22.2536	70.7092
28.1837	29.8128
73.4411	30.1843
32.7291	64.8394
24.3249	132.371
32.9354	70.968
17.5542	65.2158
30.9785	102.99
37.7752	33.1149
27.0363	89.6388
44.3248	167.515
72.7065	83.4317
29.2961	167.062
33.5101	153.301
29.0044	94.6036
30.0222	110.391
31.4048	108.774
33.0977	100.567
32.3852	68.147
64.6363	138.534
19.0668	96.7999
37.5597	87.8977
24.1243	158.116
23.4313	81.0677
31.7657	137.467
44.2253	78.2877
29.1551	17.7681
26.6701	36.6701
36.7543	29.3184
26.1486	46.2188
40.3768	47.9748
21.7272	55.2819
33.2084	26.0813
25.1949	83.8106
32.3068	65.4632
16.58	27.0988
34.9002	25.6009
22.5475	78.6435
30.0406	66.4947
20.3142	52.5891
37.4609	19.1408
17.283	42.6965
24.8473	44.7843
30.4965	56.5126
23.3403	32.2855
27.7838	16.2755
30.2783	14.3809
27.9684	65.19
25.6103	35.0822
33.4285	71.3597
22.1977	24.408
19.2868	25.6193
22.3177	23.1117
32.8897	25.812
26.7852	52.7515
28.6237	121.217
16.2444	105.393
33.5033	16.4192
24.25	28.6748
40.2774	36.786
15.0665	17.3806
25.715	27.8391
19.4834	37.2309
12.4436	35.5295
18.0287	35.1416
12.101	81.5939
12.8462	38.2631
12.3586	20
16.0753	47.5772
19.3896	41.713
18.3462	25.1806
13.9007	31.3512
13.9061	35.708
15.0752	22.2507
10.5288	61.1303
11.6195	78.7551
15.4843	30.3836
15.1523	36.2216
12.1961	34.8257
11.9773	21.997
18.7227	33.2078
16.7218	39.0836
16.9553	16.5409
21.0942	28.2526
25.2789	97.768
11.5655	66.8059
17.3873	37.0384
10.3253	28.7107
12.2334	70.7634
12.9272	17.2658
13.9827	46.4306
12.4357	47.4305
13.1681	57.8138
9.54728	65.8258
19.6555	29.8964
32.6599	43.7828
11.8563	24.8212
17.7535	44.9026
18.5332	26.7666
19.6775	16.4805
11.1447	72.6841
13.0859	90.4079
12.2301	39.422
20.9157	16.7382
9.1047	19.1733
9.03783	43.2483
37.0477	13.3184
17.6753	36.7725
12.6236	51.4425
7.61059	69.7099
15.8512	24.5765
22.5195	49.4611
20.9837	55.4805
7.70218	41.6882
12.9969	20.804
29.2401	23.6091
17.398	14.8846
10.8906	38.6385
21.9344	20.4918
12.585	41.8979
13.9351	41.5662
11.8721	45.2356
31.5806	37.6952
20.7125	26.1696
17.4783	55.0949
12.843	22.1864
20.0737	42.4442
13.2353	84.4391
22.0569	16.9419
19.7536	46.1317
9.76993	54.9895
14.7726	26.1231
19.9959	17.4703
18.8339	36.8498
15.3336	36.7844
17.6717	26.9002
11.0608	49.4556
10.5222	27.5558
17.8231	18.3989
19.3474	29.0352
16.1521	57.7062
13.6702	35.5614
13.6948	61.2583
39.4667	59.913
16.6781	35.3485
12.3387	13.7732
19.6797	43.0698
20.5879	34.733
21.0001	28.9732
25.1592	45.343
23.7309	14.2852
16.7015	37.2093
20.6493	78.4351
25.0077	21.0201
13.0812	31.9779
12.9789	22.6221
9.91326	29.1386
17.8445	14.2313
18.3448	19.8358
14.2768	33.6849
24.4683	60.7102
8.72821	39.9523
11.6896	37.5862
10.9525	57.5413
11.3024	26.8468
26.3399	138.095
16.41	64.2982
17.9395	68.6966
28.0259	25.2314
35.8843	33.254
16.6511	122.886
16.6431	73.3882
17.2804	29.2894
25.8176	29.3845
23.4724	80.4044
21.4258	168.01
19.3851	31.4182
15.0799	26.6805
25.6981	50.6668
20.264	134.851
13.576	39.4357
21.1863	40.0916
10.8541	82.2511
15.757	44.2289
11.867	29.1391
16.1714	24.0693
14.2575	30.1983
19.6773	29.3054
15.219	189.971
10.7886	24.3037
20.9115	77.0757
38.4496	41.8931
16.3737	91.8235
17.739	61.5249
26.5607	22.3222
25.7771	51.8198
13.599	30.2412
16.5971	49.434
16.6254	52.8111
22.8925	25.3842
41.0671	28.3337
8.01089	53.939
21.2086	25.2358
15.444	35.609
17.7233	27.6167
21.9016	61.8334
36.964	34.8293
17.3842	54.3965
25.2372	77.6962
23.7177	44.0847
11.5271	31.3843
19.833	38.0161
34.0094	49.97
20.1042	34.5149
27.2402	61.1185
28.5137	48.344
22.3129	61.9339
17.8691	38.2436
26.6476	38.9823
23.3522	48.0858
19.0256	38.516
27.1975	48.7135
17.9224	53.3428
22.5495	77.3588
16.2165	51.7271
21.2501	36.8286
21.1657	28.262
26.5666	43.3744
20.2955	37.6937
24.4875	20.0619
31.7493	58.5564
17.4879	67.8571
15.8726	26.064
14.3694	47.8974
20.7493	76.6616
19.1099	29.6649
32.2639	19.6474
29.9872	30.8894
24.281	18.8943
13.908	55.3327
26.9872	86.8068
18.1828	62.4241
15.3312	39.2526
25.2031	54.723
18.4653	42.1305
27.0465	78.0349
60.4651	49.1913
29.4848	14.4998
15.6514	28.0839
16.37	36.801
16.7234	68.7883
38.3393	53.9606
17.1678	249.565
19.2144	207.808
17.5285	167.776
29.7356	41.328
29.7709	33.5791
16.9597	31.1386
37.3473	15.6351
16.0067	87.33
22.6704	39.5279
14.8609	46.2091
20.5006	33.8821
18.1413	33.8179
11.9106	13.9728
15.5931	54.1604
16.0928	111.09
6.89488	26.0389
20.0145	52.0504
23.635	36.0215
25.869	22.0665
18.4789	26.8817
43.2921	63.3072
14.1646	40.9248
17.7974	48.5709
15.2523	136.516
15.9777	18.1128
22.4397	23.7417
17.5077	32.5709
34.5322	34.3486
21.3521	49.1169
15.4828	78.5165
26.0465	59.364
47.4213	48.4022
36.6915	42.2176
24.1315	19.4422
22.2786	53.045
36.1226	26.5741
30.6723	23.8831
14.1381	30.6813
30.2375	30.2755
25.186	79.8671
24.323	81.9614
18.4366	100.072
9.97862	22.7296
26.062	60.9713
15.279	35.0536
23.2835	39.1372
13.5678	19.9113
15.1679	15.6189
18.5366	49.9138
17.6271	47.2559
15.1321	20.8088
9.30377	24.8941
13.9643	94.6327
15.0341	156.773
16.9429	77.8696
12.4057	86.8191
37.9186	77.1168
24.4919	28.3537
20.5698	60.2625
4.18994	15.2732
19.1718	35.1411
23.3839	40.5206
45.7884	60.4883
8.85548	39.1714
17.6193	119.758
24.421	115.627
20.293	20.6296
16.7821	49.1815
19.335	49.432
23.4872	47.2567
8.80723	36.8896
42.9141	53.1318
20.764	159.748
22.2309	34.8444
18.0797	42.6007
39.9958	14.6464
58.4322	14.5503
54.5746	20.9287
8.96248	44.4534
14.577	55.4603
17.109	33.6465
16.8151	58.4269
7.45966	87.2634
5.97784	222.532
14.4722	81.2376
25.3544	52.5778
17.0257	34.8408
23.6793	26.4987
18.7886	35.9635
39.5376	36.4845
17.3495	18.5701
15.8519	24.3275
13.7482	49.6264
51.218	65.731
31.9803	104.099
11.8522	73.1939
51.9481	116.871
20.9519	167.565
18.8533	158.244
7.74644	84.4756
15.3592	52.8574
58.7953	16.0419
16.6558	187.132
17.1709	53.2625
15.9957	65.7669
22.9315	198.272
10.1868	37.5615
23.608	14.2163
13.4525	45.5134
18.7949	36.4368
30.5545	72.1466
11.8324	54.8058
27.0613	18.5147
15.079	18.445
16.0366	124.102
17.1629	79.9958
16.6931	79.7188
14.6352	34.4396
18.0143	72.1302
15.5877	40.9465
16.1931	78.0262
23.2443	69.8999
22.0044	59.1307
20.0078	35.0553
41.9083	58.0765
20.9774	42.8643
17.5207	18.9348
34.8677	29.2859
17.2621	15.1
17.9474	78.5821
42.1509	16.6933
16.9893	90.6339
22.6189	27.4469
26.796	74.2783
24.0676	196.267
11.1314	30.813
37.6619	26.0964
17.1881	15.9659
13.0807	73.1054
34.8049	78.3121
35.8744	70.6777
25.8071	91.1137
29.9092	98.1816
29.9737	107.352
32.5959	133.575
119.158	60.8898
	95.0728
	42.4036
	19.0146
	18.1475
	22.6522
	27.1635
	26.6813
	34.8103
	20.7773
	74.3989
	98.6022
	91.913
	56.5098
	19.2625
	44.1853
	28.5171
	21.7957
	30.2329
	67.6819
	26.8705
	37.1823
	19.9692
	36.328
	58.702
	33.5618
	17.3218
	44.823
	94.0666
	74.2776
	106.746
	30.812
	56.7835
	28.7639
	80.1822
	179.379
	31.6316
	15.1172
	30.0637
	41.1575
	29.9907
	32.5975
	126.781
	47.1295
	79.5742
	79.4034
	131.254
	19.6085
	20.6825
	19.4532
	48.0137
	44.4695
	18.9479
	45.3361
	65.2381
	32.9098
	15.8408
	52.8819
	25.0653
	21.9895
	104.569
	91.2459
	37.9988
	21.0163
	25.9067
	14.736
	25.5583
	54.2142
	32.7574
	18.0397
	46.056
	32.3165
	64.2495
	14.9818
	35.9464
	13.7822
	52.2548
	38.1159
	23.7468
	113.907
	47.9022
	14.441
	51.509
	30.9218
	15.2717
	98.2867
	31.8813
	52.562
	17.0543
	37.2401
	45.7147
	24.6109
	117.146
	151.375
	88.5807
	31.6056
	21.0063
	22.9389
	186.564
	51.2926
	115.157
	16.1104
	51.5703
	23.2214
	41.4036
	195.396
	30.1246
	39.1636
	113.497
	131.56
	32.4561
	38.7543
	15.7616
	33.5662
	22.7699
	36.2153
	15.5971
	63.0987
	20.4319
	114.959
	114.98
	106.059
	124.436
	16.3872
	45.5874
	48.7387
	39.6172
	44.419
	53.4022
	119.986
	14.3693
	22.323
	32.2558
	26.5117
	15.8076
	64.2709
	79.9035
	55.159
	80.1463
	124.871
	61.5755
	51.4996
	29.1745
	56.8504
	109.351
	59.2706
	35.1932
	106.203
	26.8817
	43.6452
	47.8435
	38.0306
	21.7839
	14.798
	32.3447
	30.2402
	111.146
	33.0966
	46.4233
	74.0377
	101.981
	14.8666
	21.023
	21.238
	69.9181
	65.1277
	34.938
	24.2185
	15.0058
	24.5243
	36.0213
	78.5492
	23.9358
	35.461
	16.5017
	76.15
	38.8632
	32.0118
	21.2078
	53.2379
	26.9547
	56.4686
	52.5149
	94.2712
	27.3129
	22.5479
	35.1503
	26.1066
	79.6407
	259.555
	14.5788
	40.2675
	21.6322
	44.3955
	129.952
	41.2238
	40.4788
	22.4008
	54.3713
	39.4686
	68.406
	55.4343
	59.0887
	30.7395
	28.2907
	17.4526
	62.1364
	24.5358
	19.0998
	33.9498
	32.3126
	93.7544
	33.0185
	47.2213
	43.98
	63.8163
	33.1368
	39.759
	34.4734
	34.2268
	48.5965
	22.6052
	196.356
	13.7072
	13.6064
	17.2396
	81.8144
	34.0929
	22.6934
	34.0849
	51.4767
	50.111
	15.5711
	54.1504
	34.8457
	22.1339
	32.5705
	123.993
	78.9682
	167.151
	66.5367
	92.4256
	27.6224
	37.7864
	20.2055
	57.8035
	26.6302
	29.4394
	30.6192
	17.3512
	26.9101
	41.9101
	46.5391
	69.6445
	35.3009
	37.7023
	23.1322
	24.8422
	25.6162
	42.3035
	91.2995
	139.843
	46.0342
	24.4308
	202.4
	45.6091
	13.6523
	55.0858
	30.975
	44.1211
	13.3983
	29.2398
	18.1123
	50.0619
	35.7143
	42.1229
	43.1264
	37.2928
	35.1119
	29.0115
	24.5776
	67.4527
	65.6945
	24.8599
	95.6222
	52.6942
	42.6882
	88.0598
	94.1388
	58.8053
	14.6129
	82.8699
	21.224
	83.4751
	100.711
	33.1012
	23.0203
	71.3868
	44.9143
	31.3087
	91.6253
	34.9836
	16.5326
	24.8096
	49.422
	57.1549
	63.2688
	15.2514
	75.9334
	33.2744
	53.2799
	32.0886
	26.2033
	34.8444
	40.2497
	22.776
	47.1219
	35.6214
	24.7365
	94.3396
	20.1688
	31.2458
	24.42
	30.9998
	23.0328
	32.049
	30.8335
	38.0386
	40.6379
	44.302
	57.0784
	51.2113
	58.5447
	29.6726
	17.901
	27.0407
	28.1032
	19.7575
	21.4645
	38.3927
	18.2784
	27.2916
	48.4672
	39.2679
	33.2658
	39.3491
	56.5163
	63.7792
	51.1916
	57.3567
	62.747
	54.2225
	113.56
	42.6277
	32.5611
	36.0019
	29.0607
	28.379
	31.1868
	62.1118
	17.0174
	50.3845
	101.438
	59.4313
	18.3999
	18.0444
	27.7646
	100.609
	37.9507
	42.1188
	40.4117
	31.1139
	25.8627
	49.4896
	38.138
	53.6922
	46.7931
	23.3637
	38.3605
	42.048
	25.6375
	36.1254
	46.8727
	105.569
	30.1257
	46.411
	52.8534
	40.3519
	30.5109
	69.5884
	17.039
	86.112
	50.4789
	42.807
	53.4142
	47.5349
	29.6429
	23.8211
	59.177
	14.7079
	51.3914
	33.867
	26.5931
	43.5839
	36.3906
	28.1228
	30.7099
	70.0733
	35.9221
	65.4938
	28.1112
	30.5768
	57.1459
	21.607
	34.3065
	47.4524
	28.7376
	53.1574
	40.1767
	102.824
	59.3582
	44.1743
	33.9253
	74.3154
	28.3504
	41.9469
	52.5826
	26.1963
	37.3783
	15.4008
	45.3126
	20.238
	58.5254
	22.1528
	15.0484
	41.825
	27.2396
	51.4503
	30.2944
	24.0475
	23.3252
	54.5096
	65.1301
	49.2274
	47.2187
	87.6993
	28.8968
	44.3899
	21.0868
	31.7017
	39.2024
	44.8526
	43.9395
	21.1624
	21.9185
	19.1318
	32.897
	48.3495
	38.1401
	26.2589
	39.2689
	42.5011
	50.4996
	37.2037
	33.7024
	32.2558
	44.547
	44.1335
	63.6308
	32.4789
	37.3867
	19.9848
	33.8542
	45.0373
	58.351
	29.8977
	34.2143
	34.6775
	19.4858
	44.5962
	118.314
	38.9516
	42.6769
	29.2256
	67.4374
	27.192
	41.5921
	21.1522
	103.729
	30.0886
	52.1178
	32.5899
	36.3192
	43.9187
	41.5311
	41.5571
	21.3812
	58.355
	17.7867
	73.104
	32.8418
	35.436
	20.7245
	93.2768
	68.7273
	51.5105
	34.3507
	48.6694
	38.5757
	40.1857
	49.8139
	33.8522
	35.6261
	24.8108
	41.5772
	84.1258
	62.6335
	98.9601
	70.026
	26.0363
	65.5636
	36.4002
	31.9871
	45.4238
	30.7582
	25.9415
	62.9565
	47.4156
	27.2944
	37.2452
	32.7278
	26.4716
	50.4685
	14.6643
	18.7653
	41.2083
	33.8706
	30.1154
	47.8858
	20.858
	29.5207
	47.1547
	58.2154
	49.0338
	31.2048
	43.8807
	39.3135
	47.256
	35.9252
	23.6156
	42.6309
	52.9695
	62.3742
	19.3144
	33.5221
	19.3859
	33.4413
	57.6612
	36.9736
	79.354
	25.431
	34.1273
	33.0096
	23.6942
	35.8083
	32.8228
	28.8105
	22.3344
	20.2303
	26.4167
	35.5525
	68.0754
	17.3707
	67.9767
	48.6071
	68.0684
	58.5173
	53.0874
	41.854
	22.6043
	20.0373
	21.4975
	20.8677
	13.2393
	44.3121
	55.8343
	40.561
	21.7732
	30.4059
	25.9094
	52.1748
	33.037
	54.1825
	46.7306
	53.4664
	30.253
	53.7412
	51.6706
	37.3416
	13.6508
	33.3126
	54.8959
	29.0362
	25.7848
	48.5709
	54.0013
	22.8817
	20.8074
	50.2651
	112.216
	44.9371
	22.1064
	37.7039
	44.2229
	49.1668
	50.5905
	32.3411
	29.519
	15.8088
	22.3531
	28.4551
	32.4218
	17.8485
	43.6219
	39.501
	24.4737
	45.1431
	100.662
	60.0628
	39.13
	46.233
	60.6272
	16.7527
	48.6807
	13.6038
	32.7379
	19.4305
	14.4801
	27.0572
	24.251
	32.2044
	26.1506
	50.65
	43.1249
	44.7699
	29.8538
	40.3381
	34.7344
	17.7462
	69.0536
	109.191
	46.1807
	32.2367
	49.0558
	38.8036
	39.1622
	39.1016
	40.603
	21.2457
	21.0791
	32.4061
	39.8727
	22.374
	26.7232
	50.7704
	52.3421
	27.3761
