# Supplementary material for: Principles of RNA recruitment to viral ribonucleoprotein condensates in a segmented dsRNA virus
Source: eLife. 2023 Jan 26;12:e68670. doi: 10.7554/eLife.68670 (PMC9925054; doi:10.7554/eLife.68670)
Supplement: Figure 4—source data 1. — Each image plane for each channel was recorded with the same image acquisition parameters. [file elife-68670-fig4-data1.xlsx]

## Sheet: Sheet1
	Cy3	Cy5
Round 1	0.54047	0.61789
Wash 1	0.01837	0.01674
Round 2	0.6398	2.28208
Wash 2	0.02593	0.0637
Round 3	0.66789	1.0244
Wash 3	0.01573	0.01551
Round 4	1.28435	1.60727
Wash 4	0.01714	0.01495
Round 5	1.21533	0.72375
