# Supplementary material for: Principles of RNA recruitment to viral ribonucleoprotein condensates in a segmented dsRNA virus
Source: eLife. 2023 Jan 26;12:e68670. doi: 10.7554/eLife.68670 (PMC9925054; doi:10.7554/eLife.68670)
Supplement: Figure 5—source data 5. [file elife-68670-fig5-data5.xlsx]

## Sheet: Sheet1
Seg 1	Seg 2	Seg 3	Seg 4	Seg 5	Seg 6	Seg 7	Seg 8	Seg 9	Seg 10	Seg 11
6364.44	4540.07	12776.9	6343.94	10241.3	12442.1	7005.64	7418.7	5208.55	12654.5	8117.7
12945.1	7646.07	22521.8	11752.5	15670.8	29008.2	14522.7	14494.6	9960.67	16530.6	16657
8534.8	6227.13	15905	8146.43	12493.9	17834.8	18892.5	11593.1	8014.01	19807.1	15130.5
3277.04	2170.99	5939.31	3562.96	4597.27	9412.13	13321.5	4648.4	3760.64	7895.75	7942.61
6496.37	4556.07	10873.2	7557.87	10148	15946	18181.3	11957.5	5957.96	20127	11883.6
6115.75	5880.5	14375.1	6656.62	9508.69	18577.3	5098.69	11508.2	5964.33	8589.98	11631.8
16147.6	14480.5	24482.1	11162	13492.5	31156.2	18779.7	18015.3	11219.2	20522.6	15501.5
12017.6	9807.27	18102.7	8191.85	11513.9	19890.4	12012.7	12836.2	7962.64	15859.7	11713
11315.7	10237.8	22864.8	9873.56	12967.6	27750	14651.8	15586.3	9658.88	20080	15874.4
10625.4	7803.87	21056.7	9267.32	14156.3	22618.3	27183.1	11836.5	11016	27689.8	14697.8
11102.8	8832.4	20280.5	10867.2	11813.9	29821.2	7496.85	11764.5	9105.65	15850.8	14371
8161.25	6348.6	16688.8	9256.07	12990.3	31419.2	15351.4	19619.1	9797.58	15769.1	14479.8
12743.6	7650.67	24967.2	10503.4	14712.8	27821.5	40013.4	16971.6	12422.4	24788.5	13121.4
5873.9	7415.78	10051.5	7744.54	7183.74	11580.1	11252.1	5718.97	4795.41	7856.47	6957.23
4048.59	3999.07	7681.59	5235.51	4730.61	10248.6	8952.28	5360.11	3667.28	6480.23	4895.01
2478.47	2295.5	3285.47	2706.47	2404.31	6068.82	3421.46	3678.74	2286.93	3555.21	3376.63
3669.39	2852.3	4522.85	3466.91	3478.4	6090.69	2689.17	3682.98	2257.24	4206.9	3591.38
4357.84	953.368	1537.54	5528.31	1407.28	3159.03	1075.61	1963.24	1253.36	868.441	2474.96
2432.93	2100.09	2089.44	3336.94	2633.92	8296.57	4394.41	4351.82	2335.41	4456.3	5344.27
2007.55	2064.89	2279.53	1951.45	1691.16	5238.59	4629.43	2623.66	2249.18	4307.19	3672.29
5844.51	5350.98	10348.6	6340.4	6322.63	17379.8	8619.24	8761.3	5011.88	6227.5	6935.15
