# Supplementary material for: Principles of RNA recruitment to viral ribonucleoprotein condensates in a segmented dsRNA virus
Source: eLife journal article supplement (doi:10.7554/elife.68670), 2023-01-26
Supplement: supp [file Book1.xls]

## Sheet: GAPDH_ROI_1
Mean
2143	3.33102
2074	3.31681
2029	3.30728
1996	3.30016
1958	3.29181
1948	3.28959
1937	3.28713
1921	3.28353
1915	3.28217
1908	3.28058
1819	3.25983
1818	3.25959
1818	3.25959
1810	3.25768
1809	3.25744
1807	3.25696
1807	3.25696
1803	3.256
1800	3.25527
1795	3.25406
1793	3.25358
1792	3.25334
1785	3.25164
1775	3.2492
1764	3.2465
1753	3.24378
1753	3.24378
1749	3.24279
1747	3.24229
1738	3.24005
1734	3.23905
1732	3.23855
1726	3.23704
1722	3.23603
1717	3.23477
1706	3.23198
1700	3.23045
1700	3.23045
1699	3.23019
1696	3.22943
1693	3.22866
1692	3.2284
1689	3.22763
1687	3.22712
1687	3.22712
1684	3.22634
1680	3.22531
1680	3.22531
1679	3.22505
1677	3.22453
1677	3.22453
1673	3.2235
1671	3.22298
1667	3.22194
1665	3.22141
1658	3.21958
1657	3.21932
1655	3.2188
1653	3.21827
1652	3.21801
1651	3.21775
1650	3.21748
1650	3.21748
1649	3.21722
1645	3.21617
1642	3.21537
1636	3.21378
1634	3.21325
1634	3.21325
1633	3.21299
1627	3.21139
1626	3.21112
1625	3.21085
1621	3.20978
1620	3.20952
1613	3.20763
1610	3.20683
1607	3.20602
1605	3.20548
1604	3.2052
1602	3.20466
1599	3.20385
1599	3.20385
1594	3.20249
1593	3.20222
1584	3.19976
1582	3.19921
1579	3.19838
1578	3.19811
1578	3.19811
1577	3.19783
1575	3.19728
1575	3.19728
1574	3.197
1573	3.19673
1571	3.19618
1571	3.19618
1571	3.19618
1571	3.19618
1569	3.19562
1565	3.19451
1564	3.19424
1561	3.1934
1560	3.19312
1560	3.19312
1560	3.19312
1560	3.19312
1559	3.19285
1558	3.19257
1555	3.19173
1553	3.19117
1551	3.19061
1549	3.19005
1549	3.19005
1547	3.18949
1543	3.18837
1540	3.18752
1540	3.18752
1538	3.18696
1535	3.18611
1534	3.18583
1532	3.18526
1531	3.18498
1527	3.18384
1527	3.18384
1524	3.18298
1522	3.18241
1522	3.18241
1521	3.18213
1519	3.18156
1514	3.18013
1513	3.17984
1512	3.17955
1512	3.17955
1511	3.17926
1510	3.17898
1509	3.17869
1509	3.17869
1507	3.17811
1507	3.17811
1507	3.17811
1503	3.17696
1501	3.17638
1499	3.1758
1499	3.1758
1498	3.17551
1498	3.17551
1497	3.17522
1494	3.17435
1493	3.17406
1492	3.17377
1489	3.17289
1488	3.1726
1488	3.1726
1487	3.17231
1486	3.17202
1486	3.17202
1486	3.17202
1485	3.17173
1485	3.17173
1484	3.17143
1484	3.17143
1484	3.17143
1481	3.17056
1480	3.17026
1480	3.17026
1479	3.16997
1478	3.16967
1476	3.16909
1476	3.16909
1475	3.16879
1475	3.16879
1474	3.1685
1473	3.1682
1472	3.16791
1472	3.16791
1472	3.16791
1468	3.16673
1467	3.16643
1464	3.16554
1462	3.16495
1460	3.16435
1460	3.16435
1459	3.16406
1458	3.16376
1458	3.16376
1456	3.16316
1455	3.16286
1455	3.16286
1455	3.16286
1454	3.16256
1453	3.16227
1453	3.16227
1453	3.16227
1452	3.16197
1451	3.16167
1451	3.16167
1451	3.16167
1451	3.16167
1450	3.16137
1449	3.16107
1449	3.16107
1449	3.16107
1449	3.16107
1448	3.16077
1446	3.16017
1444	3.15957
1444	3.15957
1444	3.15957
1444	3.15957
1443	3.15927
1443	3.15927
1442	3.15897
1442	3.15897
1441	3.15866
1439	3.15806
1437	3.15746
1435	3.15685
1434	3.15655
1434	3.15655
1433	3.15625
1432	3.15594
1432	3.15594
1432	3.15594
1432	3.15594
1432	3.15594
1430	3.15534
1429	3.15503
1429	3.15503
1429	3.15503
1429	3.15503
1428	3.15473
1427	3.15442
1427	3.15442
1426	3.15412
1426	3.15412
1426	3.15412
1426	3.15412
1425	3.15381
1425	3.15381
1424	3.15351
1424	3.15351
1424	3.15351
1424	3.15351
1423	3.1532
1423	3.1532
1423	3.1532
1423	3.1532
1422	3.1529
1421	3.15259
1421	3.15259
1421	3.15259
1420	3.15229
1420	3.15229
1420	3.15229
1419	3.15198
1419	3.15198
1419	3.15198
1418	3.15168
1418	3.15168
1417	3.15137
1417	3.15137
1417	3.15137
1417	3.15137
1417	3.15137
1415	3.15076
1415	3.15076
1415	3.15076
1414	3.15045
1414	3.15045
1413	3.15014
1412	3.14983
1411	3.14953
1411	3.14953
1410	3.14922
1410	3.14922
1409	3.14891
1408	3.1486
1407	3.14829
1406	3.14799
1404	3.14737
1404	3.14737
1404	3.14737
1400	3.14613
1399	3.14582
1397	3.1452
1397	3.1452
1396	3.14489
1396	3.14489
1396	3.14489
1396	3.14489
1395	3.14457
1395	3.14457
1394	3.14426
1394	3.14426
1393	3.14395
1393	3.14395
1392	3.14364
1392	3.14364
1392	3.14364
1392	3.14364
1391	3.14333
1391	3.14333
1390	3.14301
1390	3.14301
1390	3.14301
1390	3.14301
1389	3.1427
1388	3.14239
1387	3.14208
1385	3.14145
1385	3.14145
1385	3.14145
1384	3.14114
1384	3.14114
1384	3.14114
1383	3.14082
1382	3.14051
1382	3.14051
1381	3.14019
1381	3.14019
1381	3.14019
1381	3.14019
1381	3.14019
1380	3.13988
1380	3.13988
1380	3.13988
1380	3.13988
1379	3.13956
1378	3.13925
1378	3.13925
1376	3.13862
1376	3.13862
1375	3.1383
1375	3.1383
1375	3.1383
1375	3.1383
1374	3.13799
1373	3.13767
1373	3.13767
1373	3.13767
1372	3.13735
1372	3.13735
1371	3.13704
1370	3.13672
1370	3.13672
1369	3.1364
1368	3.13609
1368	3.13609
1368	3.13609
1365	3.13513
1365	3.13513
1365	3.13513
1364	3.13481
1363	3.1345
1362	3.13418
1361	3.13386
1361	3.13386
1361	3.13386
1361	3.13386
1361	3.13386
1358	3.1329
1358	3.1329
1357	3.13258
1357	3.13258
1356	3.13226
1356	3.13226
1356	3.13226
1356	3.13226
1355	3.13194
1355	3.13194
1355	3.13194
1355	3.13194
1354	3.13162
1354	3.13162
1352	3.13098
1352	3.13098
1352	3.13098
1351	3.13066
1351	3.13066
1350	3.13033
1350	3.13033
1349	3.13001
1349	3.13001
1349	3.13001
1349	3.13001
1349	3.13001
1348	3.12969
1348	3.12969
1346	3.12905
1345	3.12872
1345	3.12872
1345	3.12872
1344	3.1284
1344	3.1284
1344	3.1284
1344	3.1284
1343	3.12808
1343	3.12808
1342	3.12775
1342	3.12775
1342	3.12775
1342	3.12775
1341	3.12743
1341	3.12743
1340	3.1271
1340	3.1271
1340	3.1271
1339	3.12678
1338	3.12646
1338	3.12646
1337	3.12613
1337	3.12613
1336	3.12581
1335	3.12548
1335	3.12548
1334	3.12516
1333	3.12483
1333	3.12483
1333	3.12483
1333	3.12483
1332	3.1245
1332	3.1245
1332	3.1245
1332	3.1245
1332	3.1245
1331	3.12418
1331	3.12418
1331	3.12418
1331	3.12418
1330	3.12385
1330	3.12385
1329	3.12352
1329	3.12352
1329	3.12352
1328	3.1232
1328	3.1232
1327	3.12287
1327	3.12287
1327	3.12287
1327	3.12287
1326	3.12254
1326	3.12254
1326	3.12254
1326	3.12254
1326	3.12254
1326	3.12254
1325	3.12222
1325	3.12222
1324	3.12189
1324	3.12189
1324	3.12189
1324	3.12189
1324	3.12189
1323	3.12156
1323	3.12156
1323	3.12156
1322	3.12123
1322	3.12123
1322	3.12123
1322	3.12123
1322	3.12123
1321	3.1209
1321	3.1209
1321	3.1209
1321	3.1209
1320	3.12057
1320	3.12057
1320	3.12057
1320	3.12057
1319	3.12024
1319	3.12024
1319	3.12024
1318	3.11992
1318	3.11992
1317	3.11959
1316	3.11926
1316	3.11926
1316	3.11926
1315	3.11893
1315	3.11893
1315	3.11893
1314	3.1186
1313	3.11826
1312	3.11793
1312	3.11793
1312	3.11793
1311	3.1176
1311	3.1176
1311	3.1176
1310	3.11727
1310	3.11727
1310	3.11727
1310	3.11727
1310	3.11727
1310	3.11727
1309	3.11694
1308	3.11661
1308	3.11661
1308	3.11661
1308	3.11661
1307	3.11628
1307	3.11628
1307	3.11628
1306	3.11594
1306	3.11594
1306	3.11594
1305	3.11561
1305	3.11561
1305	3.11561
1305	3.11561
1305	3.11561
1304	3.11528
1304	3.11528
1303	3.11494
1303	3.11494
1303	3.11494
1303	3.11494
1303	3.11494
1302	3.11461
1302	3.11461
1302	3.11461
1301	3.11428
1301	3.11428
1300	3.11394
1300	3.11394
1299	3.11361
1299	3.11361
1299	3.11361
1299	3.11361
1298	3.11327
1298	3.11327
1298	3.11327
1298	3.11327
1298	3.11327
1297	3.11294
1297	3.11294
1297	3.11294
1297	3.11294
1297	3.11294
1297	3.11294
1296	3.11261
1296	3.11261
1296	3.11261
1296	3.11261
1295	3.11227
1295	3.11227
1295	3.11227
1294	3.11193
1294	3.11193
1294	3.11193
1294	3.11193
1294	3.11193
1294	3.11193
1294	3.11193
1293	3.1116
1293	3.1116
1293	3.1116
1293	3.1116
1293	3.1116
1292	3.11126
1292	3.11126
1292	3.11126
1291	3.11093
1291	3.11093
1290	3.11059
1290	3.11059
1290	3.11059
1290	3.11059
1290	3.11059
1289	3.11025
1289	3.11025
1289	3.11025
1289	3.11025
1288	3.10992
1288	3.10992
1287	3.10958
1287	3.10958
1287	3.10958
1287	3.10958
1286	3.10924
1286	3.10924
1286	3.10924
1286	3.10924
1285	3.1089
1285	3.1089
1285	3.1089
1285	3.1089
1285	3.1089
1284	3.10857
1284	3.10857
1284	3.10857
1284	3.10857
1283	3.10823
1283	3.10823
1283	3.10823
1283	3.10823
1282	3.10789
1282	3.10789
1281	3.10755
1281	3.10755
1280	3.10721
1280	3.10721
1280	3.10721
1279	3.10687
1279	3.10687
1279	3.10687
1279	3.10687
1279	3.10687
1279	3.10687
1278	3.10653
1277	3.10619
1277	3.10619
1276	3.10585
1276	3.10585
1275	3.10551
1275	3.10551
1275	3.10551
1274	3.10517
1274	3.10517
1274	3.10517
1274	3.10517
1273	3.10483
1273	3.10483
1273	3.10483
1273	3.10483
1272	3.10449
1271	3.10415
1270	3.1038
1270	3.1038
1270	3.1038
1270	3.1038
1270	3.1038
1269	3.10346
1269	3.10346
1269	3.10346
1269	3.10346
1269	3.10346
1269	3.10346
1269	3.10346
1268	3.10312
1268	3.10312
1268	3.10312
1268	3.10312
1267	3.10278
1266	3.10243
1266	3.10243
1266	3.10243
1265	3.10209
1265	3.10209
1265	3.10209
1265	3.10209
1265	3.10209
1265	3.10209
1264	3.10175
1264	3.10175
1264	3.10175
1264	3.10175
1264	3.10175
1264	3.10175
1263	3.1014
1263	3.1014
1263	3.1014
1263	3.1014
1263	3.1014
1263	3.1014
1262	3.10106
1261	3.10072
1261	3.10072
1261	3.10072
1261	3.10072
1260	3.10037
1260	3.10037
1260	3.10037
1259	3.10003
1259	3.10003
1259	3.10003
1259	3.10003
1259	3.10003
1258	3.09968
1258	3.09968
1257	3.09934
1257	3.09934
1257	3.09934
1256	3.09899
1256	3.09899
1256	3.09899
1256	3.09899
1256	3.09899
1256	3.09899
1256	3.09899
1256	3.09899
1255	3.09864
1255	3.09864
1255	3.09864
1254	3.0983
1253	3.09795
1253	3.09795
1253	3.09795
1253	3.09795
1252	3.0976
1252	3.0976
1252	3.0976
1251	3.09726
1250	3.09691
1250	3.09691
1250	3.09691
1249	3.09656
1249	3.09656
1249	3.09656
1249	3.09656
1249	3.09656
1248	3.09621
1248	3.09621
1248	3.09621
1248	3.09621
1248	3.09621
1247	3.09587
1247	3.09587
1246	3.09552
1246	3.09552
1246	3.09552
1245	3.09517
1245	3.09517
1245	3.09517
1244	3.09482
1244	3.09482
1244	3.09482
1244	3.09482
1244	3.09482
1244	3.09482
1243	3.09447
1243	3.09447
1243	3.09447
1243	3.09447
1243	3.09447
1242	3.09412
1242	3.09412
1242	3.09412
1242	3.09412
1242	3.09412
1242	3.09412
1241	3.09377
1241	3.09377
1241	3.09377
1241	3.09377
1241	3.09377
1241	3.09377
1241	3.09377
1240	3.09342
1240	3.09342
1240	3.09342
1240	3.09342
1240	3.09342
1240	3.09342
1240	3.09342
1239	3.09307
1239	3.09307
1238	3.09272
1238	3.09272
1238	3.09272
1238	3.09272
1238	3.09272
1238	3.09272
1238	3.09272
1238	3.09272
1238	3.09272
1237	3.09237
1237	3.09237
1237	3.09237
1237	3.09237
1237	3.09237
1237	3.09237
1236	3.09202
1236	3.09202
1236	3.09202
1236	3.09202
1236	3.09202
1236	3.09202
1236	3.09202
1235	3.09167
1235	3.09167
1235	3.09167
1235	3.09167
1235	3.09167
1235	3.09167
1235	3.09167
1234	3.09132
1234	3.09132
1233	3.09096
1233	3.09096
1232	3.09061
1232	3.09061
1232	3.09061
1232	3.09061
1232	3.09061
1232	3.09061
1231	3.09026
1231	3.09026
1231	3.09026
1231	3.09026
1230	3.08991
1230	3.08991
1230	3.08991
1230	3.08991
1229	3.08955
1228	3.0892
1228	3.0892
1228	3.0892
1228	3.0892
1227	3.08884
1227	3.08884
1227	3.08884
1227	3.08884
1227	3.08884
1227	3.08884
1226	3.08849
1226	3.08849
1226	3.08849
1226	3.08849
1225	3.08814
1225	3.08814
1225	3.08814
1225	3.08814
1225	3.08814
1224	3.08778
1224	3.08778
1224	3.08778
1224	3.08778
1224	3.08778
1224	3.08778
1224	3.08778
1224	3.08778
1223	3.08743
1223	3.08743
1223	3.08743
1223	3.08743
1223	3.08743
1223	3.08743
1222	3.08707
1222	3.08707
1222	3.08707
1222	3.08707
1222	3.08707
1222	3.08707
1222	3.08707
1222	3.08707
1222	3.08707
1222	3.08707
1221	3.08672
1221	3.08672
1220	3.08636
1220	3.08636
1220	3.08636
1220	3.08636
1220	3.08636
1220	3.08636
1219	3.086
1219	3.086
1219	3.086
1219	3.086
1218	3.08565
1218	3.08565
1218	3.08565
1218	3.08565
1218	3.08565
1218	3.08565
1217	3.08529
1217	3.08529
1217	3.08529
1216	3.08493
1216	3.08493
1216	3.08493
1216	3.08493
1216	3.08493
1215	3.08458
1215	3.08458
1215	3.08458
1215	3.08458
1214	3.08422
1214	3.08422
1213	3.08386
1213	3.08386
1213	3.08386
1213	3.08386
1213	3.08386
1213	3.08386
1212	3.0835
1212	3.0835
1212	3.0835
1212	3.0835
1211	3.08314
1211	3.08314
1211	3.08314
1211	3.08314
1211	3.08314
1211	3.08314
1211	3.08314
1211	3.08314
1210	3.08279
1210	3.08279
1210	3.08279
1210	3.08279
1210	3.08279
1209	3.08243
1209	3.08243
1209	3.08243
1208	3.08207
1208	3.08207
1208	3.08207
1208	3.08207
1208	3.08207
1207	3.08171
1207	3.08171
1207	3.08171
1207	3.08171
1207	3.08171
1206	3.08135
1206	3.08135
1206	3.08135
1205	3.08099
1205	3.08099
1205	3.08099
1205	3.08099
1205	3.08099
1205	3.08099
1204	3.08063
1204	3.08063
1204	3.08063
1204	3.08063
1204	3.08063
1204	3.08063
1203	3.08027
1203	3.08027
1203	3.08027
1202	3.0799
1202	3.0799
1202	3.0799
1202	3.0799
1201	3.07954
1201	3.07954
1200	3.07918
1200	3.07918
1200	3.07918
1200	3.07918
1200	3.07918
1200	3.07918
1200	3.07918
1199	3.07882
1199	3.07882
1199	3.07882
1199	3.07882
1199	3.07882
1198	3.07846
1198	3.07846
1197	3.07809
1197	3.07809
1197	3.07809
1197	3.07809
1196	3.07773
1196	3.07773
1196	3.07773
1196	3.07773
1196	3.07773
1196	3.07773
1196	3.07773
1196	3.07773
1195	3.07737
1195	3.07737
1195	3.07737
1195	3.07737
1195	3.07737
1195	3.07737
1194	3.077
1194	3.077
1194	3.077
1194	3.077
1193	3.07664
1193	3.07664
1193	3.07664
1193	3.07664
1193	3.07664
1193	3.07664
1193	3.07664
1192	3.07628
1192	3.07628
1192	3.07628
1192	3.07628
1192	3.07628
1192	3.07628
1192	3.07628
1192	3.07628
1192	3.07628
1192	3.07628
1191	3.07591
1191	3.07591
1191	3.07591
1191	3.07591
1191	3.07591
1191	3.07591
1191	3.07591
1191	3.07591
1190	3.07555
1190	3.07555
1190	3.07555
1190	3.07555
1190	3.07555
1190	3.07555
1190	3.07555
1190	3.07555
1189	3.07518
1189	3.07518
1189	3.07518
1189	3.07518
1188	3.07482
1188	3.07482
1188	3.07482
1188	3.07482
1188	3.07482
1188	3.07482
1188	3.07482
1187	3.07445
1187	3.07445
1187	3.07445
1187	3.07445
1187	3.07445
1187	3.07445
1187	3.07445
1186	3.07408
1186	3.07408
1186	3.07408
1186	3.07408
1186	3.07408
1185	3.07372
1185	3.07372
1185	3.07372
1185	3.07372
1184	3.07335
1184	3.07335
1184	3.07335
1184	3.07335
1184	3.07335
1183	3.07298
1183	3.07298
1183	3.07298
1183	3.07298
1183	3.07298
1183	3.07298
1183	3.07298
1182	3.07262
1182	3.07262
1182	3.07262
1182	3.07262
1182	3.07262
1182	3.07262
1182	3.07262
1181	3.07225
1181	3.07225
1181	3.07225
1181	3.07225
1181	3.07225
1181	3.07225
1181	3.07225
1181	3.07225
1181	3.07225
1181	3.07225
1180	3.07188
1180	3.07188
1180	3.07188
1180	3.07188
1180	3.07188
1180	3.07188
1180	3.07188
1179	3.07151
1179	3.07151
1179	3.07151
1179	3.07151
1179	3.07151
1178	3.07115
1178	3.07115
1178	3.07115
1178	3.07115
1178	3.07115
1178	3.07115
1178	3.07115
1177	3.07078
1177	3.07078
1177	3.07078
1177	3.07078
1177	3.07078
1176	3.07041
1176	3.07041
1176	3.07041
1176	3.07041
1175	3.07004
1175	3.07004
1175	3.07004
1175	3.07004
1175	3.07004
1174	3.06967
1174	3.06967
1174	3.06967
1174	3.06967
1174	3.06967
1174	3.06967
1174	3.06967
1174	3.06967
1173	3.0693
1173	3.0693
1173	3.0693
1173	3.0693
1173	3.0693
1173	3.0693
1172	3.06893
1172	3.06893
1172	3.06893
1172	3.06893
1172	3.06893
1172	3.06893
1171	3.06856
1171	3.06856
1171	3.06856
1171	3.06856
1171	3.06856
1170	3.06819
1170	3.06819
1170	3.06819
1170	3.06819
1170	3.06819
1170	3.06819
1169	3.06781
1169	3.06781
1169	3.06781
1168	3.06744
1168	3.06744
1168	3.06744
1168	3.06744
1168	3.06744
1168	3.06744
1168	3.06744
1168	3.06744
1167	3.06707
1167	3.06707
1167	3.06707
1167	3.06707
1167	3.06707
1166	3.0667
1166	3.0667
1166	3.0667
1166	3.0667
1166	3.0667
1166	3.0667
1166	3.0667
1165	3.06633
1165	3.06633
1165	3.06633
1165	3.06633
1164	3.06595
1164	3.06595
1164	3.06595
1164	3.06595
1164	3.06595
1164	3.06595
1164	3.06595
1164	3.06595
1164	3.06595
1164	3.06595
1164	3.06595
1164	3.06595
1164	3.06595
1164	3.06595
1164	3.06595
1163	3.06558
1163	3.06558
1163	3.06558
1163	3.06558
1162	3.06521
1162	3.06521
1162	3.06521
1162	3.06521
1162	3.06521
1162	3.06521
1161	3.06483
1161	3.06483
1161	3.06483
1161	3.06483
1161	3.06483
1161	3.06483
1161	3.06483
1161	3.06483
1161	3.06483
1161	3.06483
1160	3.06446
1160	3.06446
1160	3.06446
1160	3.06446
1160	3.06446
1160	3.06446
1160	3.06446
1160	3.06446
1159	3.06408
1159	3.06408
1159	3.06408
1159	3.06408
1159	3.06408
1159	3.06408
1159	3.06408
1159	3.06408
1159	3.06408
1158	3.06371
1158	3.06371
1158	3.06371
1158	3.06371
1157	3.06333
1157	3.06333
1156	3.06296
1156	3.06296
1156	3.06296
1156	3.06296
1156	3.06296
1156	3.06296
1156	3.06296
1156	3.06296
1156	3.06296
1156	3.06296
1155	3.06258
1155	3.06258
1155	3.06258
1155	3.06258
1155	3.06258
1155	3.06258
1154	3.06221
1154	3.06221
1154	3.06221
1154	3.06221
1154	3.06221
1153	3.06183
1153	3.06183
1153	3.06183
1153	3.06183
1153	3.06183
1152	3.06145
1152	3.06145
1152	3.06145
1152	3.06145
1152	3.06145
1151	3.06108
1151	3.06108
1151	3.06108
1151	3.06108
1151	3.06108
1151	3.06108
1150	3.0607
1150	3.0607
1150	3.0607
1150	3.0607
1150	3.0607
1150	3.0607
1150	3.0607
1149	3.06032
1149	3.06032
1149	3.06032
1149	3.06032
1149	3.06032
1148	3.05994
1148	3.05994
1148	3.05994
1148	3.05994
1148	3.05994
1148	3.05994
1147	3.05956
1147	3.05956
1147	3.05956
1147	3.05956
1146	3.05918
1146	3.05918
1146	3.05918
1146	3.05918
1146	3.05918
1146	3.05918
1146	3.05918
1145	3.05881
1145	3.05881
1145	3.05881
1145	3.05881
1145	3.05881
1145	3.05881
1145	3.05881
1144	3.05843
1144	3.05843
1144	3.05843
1144	3.05843
1144	3.05843
1144	3.05843
1144	3.05843
1143	3.05805
1143	3.05805
1143	3.05805
1143	3.05805
1143	3.05805
1143	3.05805
1143	3.05805
1142	3.05767
1142	3.05767
1142	3.05767
1141	3.05729
1141	3.05729
1141	3.05729
1141	3.05729
1141	3.05729
1141	3.05729
1141	3.05729
1140	3.0569
1140	3.0569
1140	3.0569
1140	3.0569
1139	3.05652
1139	3.05652
1139	3.05652
1139	3.05652
1139	3.05652
1139	3.05652
1139	3.05652
1138	3.05614
1138	3.05614
1138	3.05614
1138	3.05614
1138	3.05614
1138	3.05614
1138	3.05614
1138	3.05614
1137	3.05576
1137	3.05576
1137	3.05576
1137	3.05576
1137	3.05576
1137	3.05576
1137	3.05576
1136	3.05538
1136	3.05538
1136	3.05538
1136	3.05538
1136	3.05538
1136	3.05538
1136	3.05538
1135	3.055
1135	3.055
1135	3.055
1135	3.055
1135	3.055
1134	3.05461
1134	3.05461
1134	3.05461
1134	3.05461
1134	3.05461
1134	3.05461
1134	3.05461
1133	3.05423
1133	3.05423
1133	3.05423
1133	3.05423
1133	3.05423
1132	3.05385
1132	3.05385
1132	3.05385
1132	3.05385
1132	3.05385
1132	3.05385
1132	3.05385
1132	3.05385
1131	3.05346
1131	3.05346
1131	3.05346
1131	3.05346
1130	3.05308
1130	3.05308
1130	3.05308
1130	3.05308
1130	3.05308
1130	3.05308
1130	3.05308
1130	3.05308
1130	3.05308
1129	3.05269
1129	3.05269
1129	3.05269
1129	3.05269
1129	3.05269
1129	3.05269
1129	3.05269
1128	3.05231
1128	3.05231
1128	3.05231
1128	3.05231
1128	3.05231
1128	3.05231
1128	3.05231
1127	3.05192
1127	3.05192
1127	3.05192
1127	3.05192
1127	3.05192
1127	3.05192
1127	3.05192
1127	3.05192
1126	3.05154
1126	3.05154
1126	3.05154
1126	3.05154
1126	3.05154
1125	3.05115
1125	3.05115
1125	3.05115
1125	3.05115
1125	3.05115
1125	3.05115
1124	3.05077
1124	3.05077
1124	3.05077
1124	3.05077
1124	3.05077
1124	3.05077
1124	3.05077
1124	3.05077
1124	3.05077
1124	3.05077
1124	3.05077
1123	3.05038
1123	3.05038
1123	3.05038
1123	3.05038
1123	3.05038
1123	3.05038
1123	3.05038
1122	3.04999
1122	3.04999
1122	3.04999
1122	3.04999
1122	3.04999
1122	3.04999
1121	3.04961
1121	3.04961
1121	3.04961
1121	3.04961
1121	3.04961
1121	3.04961
1120	3.04922
1120	3.04922
1120	3.04922
1119	3.04883
1119	3.04883
1119	3.04883
1119	3.04883
1119	3.04883
1119	3.04883
1119	3.04883
1118	3.04844
1118	3.04844
1118	3.04844
1118	3.04844
1118	3.04844
1117	3.04805
1117	3.04805
1117	3.04805
1117	3.04805
1117	3.04805
1117	3.04805
1117	3.04805
1117	3.04805
1117	3.04805
1116	3.04766
1116	3.04766
1116	3.04766
1116	3.04766
1116	3.04766
1116	3.04766
1116	3.04766
1116	3.04766
1116	3.04766
1116	3.04766
1116	3.04766
1116	3.04766
1116	3.04766
1115	3.04727
1115	3.04727
1115	3.04727
1115	3.04727
1115	3.04727
1115	3.04727
1115	3.04727
1115	3.04727
1114	3.04689
1114	3.04689
1114	3.04689
1114	3.04689
1114	3.04689
1114	3.04689
1113	3.0465
1113	3.0465
1113	3.0465
1113	3.0465
1113	3.0465
1112	3.0461
1112	3.0461
1112	3.0461
1112	3.0461
1112	3.0461
1112	3.0461
1112	3.0461
1111	3.04571
1111	3.04571
1111	3.04571
1111	3.04571
1111	3.04571
1111	3.04571
1111	3.04571
1111	3.04571
1111	3.04571
1111	3.04571
1110	3.04532
1110	3.04532
1110	3.04532
1110	3.04532
1110	3.04532
1110	3.04532
1110	3.04532
1110	3.04532
1110	3.04532
1109	3.04493
1109	3.04493
1109	3.04493
1109	3.04493
1109	3.04493
1109	3.04493
1109	3.04493
1109	3.04493
1109	3.04493
1109	3.04493
1109	3.04493
1109	3.04493
1108	3.04454
1108	3.04454
1108	3.04454
1108	3.04454
1108	3.04454
1108	3.04454
1108	3.04454
1107	3.04415
1107	3.04415
1107	3.04415
1107	3.04415
1106	3.04376
1106	3.04376
1106	3.04376
1106	3.04376
1106	3.04376
1106	3.04376
1106	3.04376
1106	3.04376
1105	3.04336
1105	3.04336
1105	3.04336
1105	3.04336
1105	3.04336
1105	3.04336
1104	3.04297
1104	3.04297
1104	3.04297
1104	3.04297
1104	3.04297
1104	3.04297
1104	3.04297
1104	3.04297
1104	3.04297
1104	3.04297
1104	3.04297
1104	3.04297
1103	3.04258
1103	3.04258
1103	3.04258
1103	3.04258
1103	3.04258
1103	3.04258
1103	3.04258
1103	3.04258
1103	3.04258
1102	3.04218
1102	3.04218
1102	3.04218
1102	3.04218
1102	3.04218
1102	3.04218
1102	3.04218
1102	3.04218
1101	3.04179
1101	3.04179
1101	3.04179
1101	3.04179
1101	3.04179
1101	3.04179
1100	3.04139
1100	3.04139
1100	3.04139
1099	3.041
1099	3.041
1099	3.041
1099	3.041
1099	3.041
1098	3.0406
1098	3.0406
1098	3.0406
1098	3.0406
1098	3.0406
1098	3.0406
1098	3.0406
1098	3.0406
1098	3.0406
1098	3.0406
1098	3.0406
1098	3.0406
1098	3.0406
1097	3.04021
1097	3.04021
1097	3.04021
1097	3.04021
1097	3.04021
1097	3.04021
1096	3.03981
1096	3.03981
1096	3.03981
1096	3.03981
1096	3.03981
1096	3.03981
1096	3.03981
1096	3.03981
1096	3.03981
1095	3.03941
1095	3.03941
1095	3.03941
1094	3.03902
1094	3.03902
1094	3.03902
1094	3.03902
1094	3.03902
1094	3.03902
1094	3.03902
1094	3.03902
1093	3.03862
1093	3.03862
1093	3.03862
1093	3.03862
1093	3.03862
1093	3.03862
1093	3.03862
1093	3.03862
1093	3.03862
1093	3.03862
1093	3.03862
1092	3.03822
1092	3.03822
1092	3.03822
1092	3.03822
1092	3.03822
1092	3.03822
1092	3.03822
1091	3.03782
1091	3.03782
1091	3.03782
1090	3.03743
1090	3.03743
1090	3.03743
1090	3.03743
1090	3.03743
1090	3.03743
1090	3.03743
1090	3.03743
1090	3.03743
1089	3.03703
1089	3.03703
1089	3.03703
1089	3.03703
1089	3.03703
1088	3.03663
1088	3.03663
1088	3.03663
1088	3.03663
1088	3.03663
1088	3.03663
1088	3.03663
1087	3.03623
1087	3.03623
1087	3.03623
1087	3.03623
1087	3.03623
1087	3.03623
1086	3.03583
1086	3.03583
1086	3.03583
1086	3.03583
1086	3.03583
1086	3.03583
1086	3.03583
1086	3.03583
1086	3.03583
1086	3.03583
1085	3.03543
1085	3.03543
1085	3.03543
1085	3.03543
1085	3.03543
1085	3.03543
1085	3.03543
1084	3.03503
1084	3.03503
1084	3.03503
1084	3.03503
1084	3.03503
1084	3.03503
1083	3.03463
1083	3.03463
1083	3.03463
1083	3.03463
1083	3.03463
1083	3.03463
1083	3.03463
1083	3.03463
1083	3.03463
1083	3.03463
1082	3.03423
1082	3.03423
1082	3.03423
1082	3.03423
1082	3.03423
1082	3.03423
1082	3.03423
1081	3.03383
1081	3.03383
1081	3.03383
1081	3.03383
1081	3.03383
1081	3.03383
1081	3.03383
1081	3.03383
1081	3.03383
1081	3.03383
1080	3.03342
1080	3.03342
1080	3.03342
1080	3.03342
1080	3.03342
1080	3.03342
1080	3.03342
1080	3.03342
1080	3.03342
1079	3.03302
1079	3.03302
1079	3.03302
1079	3.03302
1079	3.03302
1079	3.03302
1079	3.03302
1078	3.03262
1078	3.03262
1078	3.03262
1078	3.03262
1078	3.03262
1077	3.03222
1077	3.03222
1077	3.03222
1077	3.03222
1077	3.03222
1077	3.03222
1077	3.03222
1077	3.03222
1076	3.03181
1076	3.03181
1076	3.03181
1076	3.03181
1076	3.03181
1075	3.03141
1075	3.03141
1075	3.03141
1075	3.03141
1075	3.03141
1075	3.03141
1075	3.03141
1075	3.03141
1074	3.031
1074	3.031
1074	3.031
1074	3.031
1073	3.0306
1073	3.0306
1073	3.0306
1073	3.0306
1073	3.0306
1073	3.0306
1073	3.0306
1073	3.0306
1072	3.03019
1072	3.03019
1072	3.03019
1072	3.03019
1072	3.03019
1072	3.03019
1072	3.03019
1072	3.03019
1072	3.03019
1071	3.02979
1071	3.02979
1071	3.02979
1071	3.02979
1071	3.02979
1071	3.02979
1070	3.02938
1070	3.02938
1070	3.02938
1070	3.02938
1069	3.02898
1069	3.02898
1069	3.02898
1069	3.02898
1069	3.02898
1069	3.02898
1069	3.02898
1069	3.02898
1068	3.02857
1068	3.02857
1068	3.02857
1068	3.02857
1068	3.02857
1068	3.02857
1068	3.02857
1068	3.02857
1067	3.02816
1067	3.02816
1067	3.02816
1067	3.02816
1067	3.02816
1067	3.02816
1067	3.02816
1066	3.02776
1066	3.02776
1066	3.02776
1066	3.02776
1066	3.02776
1066	3.02776
1066	3.02776
1066	3.02776
1065	3.02735
1065	3.02735
1065	3.02735
1065	3.02735
1065	3.02735
1065	3.02735
1065	3.02735
1065	3.02735
1065	3.02735
1065	3.02735
1064	3.02694
1064	3.02694
1064	3.02694
1064	3.02694
1064	3.02694
1064	3.02694
1064	3.02694
1064	3.02694
1064	3.02694
1064	3.02694
1064	3.02694
1064	3.02694
1063	3.02653
1063	3.02653
1063	3.02653
1063	3.02653
1063	3.02653
1063	3.02653
1063	3.02653
1063	3.02653
1063	3.02653
1063	3.02653
1063	3.02653
1062	3.02612
1062	3.02612
1062	3.02612
1062	3.02612
1062	3.02612
1062	3.02612
1061	3.02572
1061	3.02572
1061	3.02572
1061	3.02572
1061	3.02572
1061	3.02572
1061	3.02572
1061	3.02572
1060	3.02531
1060	3.02531
1060	3.02531
1060	3.02531
1060	3.02531
1060	3.02531
1060	3.02531
1060	3.02531
1060	3.02531
1060	3.02531
1060	3.02531
1060	3.02531
1060	3.02531
1060	3.02531
1060	3.02531
1060	3.02531
1060	3.02531
1059	3.0249
1059	3.0249
1059	3.0249
1059	3.0249
1059	3.0249
1059	3.0249
1059	3.0249
1059	3.0249
1059	3.0249
1058	3.02449
1058	3.02449
1058	3.02449
1058	3.02449
1058	3.02449
1058	3.02449
1058	3.02449
1058	3.02449
1058	3.02449
1058	3.02449
1058	3.02449
1058	3.02449
1058	3.02449
1057	3.02407
1057	3.02407
1057	3.02407
1057	3.02407
1057	3.02407
1057	3.02407
1056	3.02366
1056	3.02366
1056	3.02366
1056	3.02366
1056	3.02366
1056	3.02366
1056	3.02366
1056	3.02366
1055	3.02325
1055	3.02325
1055	3.02325
1055	3.02325
1055	3.02325
1055	3.02325
1055	3.02325
1055	3.02325
1055	3.02325
1055	3.02325
1054	3.02284
1054	3.02284
1054	3.02284
1054	3.02284
1054	3.02284
1054	3.02284
1054	3.02284
1054	3.02284
1054	3.02284
1054	3.02284
1054	3.02284
1054	3.02284
1054	3.02284
1054	3.02284
1054	3.02284
1054	3.02284
1053	3.02243
1053	3.02243
1053	3.02243
1053	3.02243
1053	3.02243
1053	3.02243
1053	3.02243
1052	3.02202
1052	3.02202
1052	3.02202
1052	3.02202
1052	3.02202
1052	3.02202
1052	3.02202
1052	3.02202
1052	3.02202
1052	3.02202
1052	3.02202
1052	3.02202
1052	3.02202
1051	3.0216
1051	3.0216
1051	3.0216
1051	3.0216
[truncated: 6,611 more rows]

## Sheet: rvRNA
	rvRNA
42054	4.62381
37358	4.57238
36757	4.56534
34256	4.53474
32829	4.51626
31935	4.50427
31264	4.49504
30929	4.49037
30719	4.48741
29293	4.46676
28209	4.45039
27959	4.44652
27873	4.44518
27507	4.43944
27015	4.4316
26789	4.42796
26479	4.4229
26459	4.42257
25400	4.40483
25118	4.39999
24709	4.39286
24414	4.38764
24325	4.38605
24251	4.38473
24135	4.38265
23894	4.37829
23707	4.37488
23682	4.37442
23224	4.36594
22907	4.35997
22825	4.35841
22818	4.35828
22755	4.35708
22276	4.34784
21666	4.33578
21214	4.32662
20956	4.32131
20217	4.30572
20157	4.30443
20052	4.30216
18546	4.26825
17430	4.2413
17244	4.23664
17230	4.23629
17036	4.23137
17019	4.23093
16953	4.22925
16916	4.2283
16582	4.21964
16566	4.21922
15572	4.19234
14052	4.14774
13900	4.14301
12669	4.10274
11296	4.05292
10561	4.02371
10263	4.01127
9667	3.98529
8479	3.92834
7055	3.8485
6078	3.78376
6018	3.77945
5774	3.76148
5216	3.71734
3975	3.59934
3456	3.53857
28265	4.45125
28079	4.44838
26954	4.43062
25406	4.40494
25073	4.39921
24002	4.38025
21726	4.33698
21634	4.33514
21609	4.33463
19011	4.279
18613	4.26982
18017	4.25568
17944	4.25392
17940	4.25382
17801	4.25044
17294	4.2379
17229	4.23626
17006	4.2306
15548	4.19167
15505	4.19047
14769	4.16935
14724	4.16803
14480	4.16077
13308	4.12411
13262	4.12261
13171	4.11962
13123	4.11803
13077	4.11651
12616	4.10092
12447	4.09506
12332	4.09103
11945	4.07719
11563	4.06307
11426	4.05789
11322	4.05392
11228	4.0503
10563	4.02379
10560	4.02366
10530	4.02243
10307	4.01313
10214	4.0092
9740	3.98856
9639	3.98403
9614	3.9829
9531	3.97914
9419	3.974
9372	3.97183
8688	3.93892
8577	3.93334
7885	3.8968
7405	3.86953
7210	3.85794
6388	3.80536
6262	3.79671
4252	3.62859
4126	3.61553
3285	3.51654
3164	3.50024
2690	3.42975

## Sheet: FreqCounts1 GAPDH
Bin Center	Bin End	Count	Cumulative Count	Relative Frequency
Frequency Counts	Frequency Counts	Frequency Counts of A1	Frequency Counts of A1	Frequency Counts of A1
0	0.015	0	0	0
0.03	0.045	0	0	0
0.06	0.075	0	0	0
0.09	0.105	0	0	0
0.12	0.135	0	0	0
0.15	0.165	0	0	0
0.18	0.195	0	0	0
0.21	0.225	0	0	0
0.24	0.255	0	0	0
0.27	0.285	0	0	0
0.3	0.315	0	0	0
0.33	0.345	0	0	0
0.36	0.375	0	0	0
0.39	0.405	0	0	0
0.42	0.435	0	0	0
0.45	0.465	0	0	0
0.48	0.495	0	0	0
0.51	0.525	0	0	0
0.54	0.555	0	0	0
0.57	0.585	0	0	0
0.6	0.615	0	0	0
0.63	0.645	0	0	0
0.66	0.675	0	0	0
0.69	0.705	0	0	0
0.72	0.735	0	0	0
0.75	0.765	0	0	0
0.78	0.795	0	0	0
0.81	0.825	0	0	0
0.84	0.855	0	0	0
0.87	0.885	0	0	0
0.9	0.915	0	0	0
0.93	0.945	0	0	0
0.96	0.975	0	0	0
0.99	1.005	0	0	0
1.02	1.035	0	0	0
1.05	1.065	0	0	0
1.08	1.095	0	0	0
1.11	1.125	0	0	0
1.14	1.155	0	0	0
1.17	1.185	0	0	0
1.2	1.215	0	0	0
1.23	1.245	0	0	0
1.26	1.275	0	0	0
1.29	1.305	0	0	0
1.32	1.335	0	0	0
1.35	1.365	0	0	0
1.38	1.395	0	0	0
1.41	1.425	0	0	0
1.44	1.455	0	0	0
1.47	1.485	0	0	0
1.5	1.515	0	0	0
1.53	1.545	0	0	0
1.56	1.575	0	0	0
1.59	1.605	0	0	0
1.62	1.635	0	0	0
1.65	1.665	0	0	0
1.68	1.695	0	0	0
1.71	1.725	0	0	0
1.74	1.755	0	0	0
1.77	1.785	0	0	0
1.8	1.815	0	0	0
1.83	1.845	0	0	0
1.86	1.875	0	0	0
1.89	1.905	0	0	0
1.92	1.935	0	0	0
1.95	1.965	0	0	0
1.98	1.995	0	0	0
2.01	2.025	0	0	0
2.04	2.055	0	0	0
2.07	2.085	0	0	0
2.1	2.115	0	0	0
2.13	2.145	0	0	0
2.16	2.175	0	0	0
2.19	2.205	0	0	0
2.22	2.235	0	0	0
2.25	2.265	0	0	0
2.28	2.295	0	0	0
2.31	2.325	0	0	0
2.34	2.355	0	0	0
2.37	2.385	0	0	0
2.4	2.415	0	0	0
2.43	2.445	0	0	0
2.46	2.475	0	0	0
2.49	2.505	0	0	0
2.52	2.535	0	0	0
2.55	2.565	0	0	0
2.58	2.595	0	0	0
2.61	2.625	0	0	0
2.64	2.655	0	0	0
2.67	2.685	0	0	0
2.7	2.715	0	0	0
2.73	2.745	0	0	0
2.76	2.775	9	9	0.0010453
2.79	2.805	32	41	0.00371661
2.82	2.835	125	166	0.014518
2.85	2.865	300	466	0.0348432
2.88	2.895	607	1073	0.0704994
2.91	2.925	858	1931	0.0996516
2.94	2.955	993	2924	0.115331
2.97	2.985	1153	4077	0.133914
3	3.015	1029	5106	0.119512
3.03	3.045	970	6076	0.11266
3.06	3.075	844	6920	0.0980256
3.09	3.105	649	7569	0.0753775
3.12	3.135	449	8018	0.0521487
3.15	3.165	282	8300	0.0327526
3.18	3.195	158	8458	0.0183508
3.21	3.225	83	8541	0.00963995
3.24	3.255	45	8586	0.00522648
3.27	3.285	14	8600	0.00162602
3.3	3.315	7	8607	0.000813008
3.33	3.345	3	8610	0.000348432
3.36	3.375	0	8610	0
3.39	3.405	0	8610	0
3.42	3.435	0	8610	0
3.45	3.465	0	8610	0
3.48	3.495	0	8610	0
3.51	3.525	0	8610	0
3.54	3.555	0	8610	0
3.57	3.585	0	8610	0
3.6	3.615	0	8610	0
3.63	3.645	0	8610	0
3.66	3.675	0	8610	0
3.69	3.705	0	8610	0
3.72	3.735	0	8610	0
3.75	3.765	0	8610	0
3.78	3.795	0	8610	0
3.81	3.825	0	8610	0
3.84	3.855	0	8610	0
3.87	3.885	0	8610	0
3.9	3.915	0	8610	0
3.93	3.945	0	8610	0
3.96	3.975	0	8610	0
3.99	4.005	0	8610	0
4.02	4.035	0	8610	0
4.05	4.065	0	8610	0
4.08	4.095	0	8610	0
4.11	4.125	0	8610	0
4.14	4.155	0	8610	0
4.17	4.185	0	8610	0
4.2	4.215	0	8610	0
4.23	4.245	0	8610	0
4.26	4.275	0	8610	0
4.29	4.305	0	8610	0
4.32	4.335	0	8610	0
4.35	4.365	0	8610	0
4.38	4.395	0	8610	0
4.41	4.425	0	8610	0
4.44	4.455	0	8610	0
4.47	4.485	0	8610	0
4.5	4.515	0	8610	0
4.53	4.545	0	8610	0
4.56	4.575	0	8610	0
4.59	4.605	0	8610	0
4.62	4.635	0	8610	0
4.65	4.665	0	8610	0
4.68	4.695	0	8610	0
4.71	4.725	0	8610	0
4.74	4.755	0	8610	0
4.77	4.785	0	8610	0
4.8	4.815	0	8610	0
4.83	4.845	0	8610	0
4.86	4.875	0	8610	0
4.89	4.905	0	8610	0
4.92	4.935	0	8610	0
4.95	4.965	0	8610	0
4.98	4.995	0	8610	0
5.01	5.025	0	8610	0

## Sheet: FreqCounts1
Bin Center	Bin End	Count	Cumulative Count	Relative Frequency
Frequency Counts	Frequency Counts	Frequency Counts of B"rvRNA"	Frequency Counts of B"rvRNA"	Frequency Counts of B"rvRNA"
0	0.015	0	0	0
0.03	0.045	0	0	0
0.06	0.075	0	0	0
0.09	0.105	0	0	0
0.12	0.135	0	0	0
0.15	0.165	0	0	0
0.18	0.195	0	0	0
0.21	0.225	0	0	0
0.24	0.255	0	0	0
0.27	0.285	0	0	0
0.3	0.315	0	0	0
0.33	0.345	0	0	0
0.36	0.375	0	0	0
0.39	0.405	0	0	0
0.42	0.435	0	0	0
0.45	0.465	0	0	0
0.48	0.495	0	0	0
0.51	0.525	0	0	0
0.54	0.555	0	0	0
0.57	0.585	0	0	0
0.6	0.615	0	0	0
0.63	0.645	0	0	0
0.66	0.675	0	0	0
0.69	0.705	0	0	0
0.72	0.735	0	0	0
0.75	0.765	0	0	0
0.78	0.795	0	0	0
0.81	0.825	0	0	0
0.84	0.855	0	0	0
0.87	0.885	0	0	0
0.9	0.915	0	0	0
0.93	0.945	0	0	0
0.96	0.975	0	0	0
0.99	1.005	0	0	0
1.02	1.035	0	0	0
1.05	1.065	0	0	0
1.08	1.095	0	0	0
1.11	1.125	0	0	0
1.14	1.155	0	0	0
1.17	1.185	0	0	0
1.2	1.215	0	0	0
1.23	1.245	0	0	0
1.26	1.275	0	0	0
1.29	1.305	0	0	0
1.32	1.335	0	0	0
1.35	1.365	0	0	0
1.38	1.395	0	0	0
1.41	1.425	0	0	0
1.44	1.455	0	0	0
1.47	1.485	0	0	0
1.5	1.515	0	0	0
1.53	1.545	0	0	0
1.56	1.575	0	0	0
1.59	1.605	0	0	0
1.62	1.635	0	0	0
1.65	1.665	0	0	0
1.68	1.695	0	0	0
1.71	1.725	0	0	0
1.74	1.755	0	0	0
1.77	1.785	0	0	0
1.8	1.815	0	0	0
1.83	1.845	0	0	0
1.86	1.875	0	0	0
1.89	1.905	0	0	0
1.92	1.935	0	0	0
1.95	1.965	0	0	0
1.98	1.995	0	0	0
2.01	2.025	0	0	0
2.04	2.055	0	0	0
2.07	2.085	0	0	0
2.1	2.115	0	0	0
2.13	2.145	0	0	0
2.16	2.175	0	0	0
2.19	2.205	0	0	0
2.22	2.235	0	0	0
2.25	2.265	0	0	0
2.28	2.295	0	0	0
2.31	2.325	0	0	0
2.34	2.355	0	0	0
2.37	2.385	0	0	0
2.4	2.415	0	0	0
2.43	2.445	0	0	0
2.46	2.475	0	0	0
2.49	2.505	0	0	0
2.52	2.535	0	0	0
2.55	2.565	0	0	0
2.58	2.595	0	0	0
2.61	2.625	0	0	0
2.64	2.655	0	0	0
2.67	2.685	0	0	0
2.7	2.715	0	0	0
2.73	2.745	0	0	0
2.76	2.775	0	0	0
2.79	2.805	0	0	0
2.82	2.835	0	0	0
2.85	2.865	0	0	0
2.88	2.895	0	0	0
2.91	2.925	0	0	0
2.94	2.955	0	0	0
2.97	2.985	0	0	0
3	3.015	0	0	0
3.03	3.045	0	0	0
3.06	3.075	0	0	0
3.09	3.105	0	0	0
3.12	3.135	0	0	0
3.15	3.165	0	0	0
3.18	3.195	0	0	0
3.21	3.225	0	0	0
3.24	3.255	0	0	0
3.27	3.285	0	0	0
3.3	3.315	0	0	0
3.33	3.345	0	0	0
3.36	3.375	0	0	0
3.39	3.405	0	0	0
3.42	3.435	1	1	0.008
3.45	3.465	0	1	0
3.48	3.495	0	1	0
3.51	3.525	2	3	0.016
3.54	3.555	1	4	0.008
3.57	3.585	0	4	0
3.6	3.615	1	5	0.008
3.63	3.645	2	7	0.016
3.66	3.675	0	7	0
3.69	3.705	0	7	0
3.72	3.735	1	8	0.008
3.75	3.765	1	9	0.008
3.78	3.795	2	11	0.016
3.81	3.825	2	13	0.016
3.84	3.855	1	14	0.008
3.87	3.885	2	16	0.016
3.9	3.915	1	17	0.008
3.93	3.945	3	20	0.024
3.96	3.975	2	22	0.016
3.99	4.005	5	27	0.04
4.02	4.035	7	34	0.056
4.05	4.065	5	39	0.04
4.08	4.095	2	41	0.016
4.11	4.125	8	49	0.064
4.14	4.155	2	51	0.016
4.17	4.185	3	54	0.024
4.2	4.215	3	57	0.024
4.23	4.245	12	69	0.096
4.26	4.275	6	75	0.048
4.29	4.305	3	78	0.024
4.32	4.335	4	82	0.032
4.35	4.365	8	90	0.064
4.38	4.395	10	100	0.08
4.41	4.425	6	106	0.048
4.44	4.455	9	115	0.072
4.47	4.485	1	116	0.008
4.5	4.515	4	120	0.032
4.53	4.545	2	122	0.016
4.56	4.575	2	124	0.016
4.59	4.605	0	124	0
4.62	4.635	1	125	0.008
4.65	4.665	0	125	0
4.68	4.695	0	125	0
4.71	4.725	0	125	0
4.74	4.755	0	125	0
4.77	4.785	0	125	0
4.8	4.815	0	125	0
4.83	4.845	0	125	0
4.86	4.875	0	125	0
4.89	4.905	0	125	0
4.92	4.935	0	125	0
4.95	4.965	0	125	0
4.98	4.995	0	125	0
5.01	5.025	0	125	0

## Sheet: FitpeakCurve1
Independent Variable	Gaussian Fit Freqs"Relative Frequency"	Independent Variable	Regular Residual Freqs"Relative Frequency"	Regular Residual Freqs"Relative Frequency"	Fitted Y	Regular Residual Freqs"Relative Frequency"	Regular Residual Freqs"Relative Frequency"	Percentiles	Reference X	Reference Line
									mu = -0.000000	sigma = 0.001922
Fitted Curves Plot	Fitted Curves Plot			Histogram of the Residual Plot	Residual vs. Predicted Values Plot	Residual vs. Predicted Values Plot	Normal Probability Plot of Residuals	Normal Probability Plot of Residuals	Normal Probability Plot of Residuals	Normal Probability Plot of Residuals
0	-7.63664e-05	0	7.63664e-05	7.63664e-05	-7.63664e-05	7.63664e-05	-0.0103657	0.371471	-0.00557545	0.185736
0.01003	-7.63664e-05	0.03	7.63664e-05	7.63664e-05	-7.63664e-05	7.63664e-05	-0.00982599	0.965825	0.00557545	99.8143
0.015045	-7.63664e-05	0.06	7.63664e-05	7.63664e-05	-7.63664e-05	7.63664e-05	-0.009019	1.56018
0.0200601	-7.63664e-05	0.09	7.63664e-05	7.63664e-05	-7.63664e-05	7.63664e-05	-0.00700052	2.15453
0.0250751	-7.63664e-05	0.12	7.63664e-05	7.63664e-05	-7.63664e-05	7.63664e-05	-0.00629702	2.74889
0.03	-7.63664e-05	0.15	7.63664e-05	7.63664e-05	-7.63664e-05	7.63664e-05	-0.00493195	3.34324
0.0300901	-7.63664e-05	0.18	7.63664e-05	7.63664e-05	-7.63664e-05	7.63664e-05	-0.00249965	3.93759
0.0351051	-7.63664e-05	0.21	7.63664e-05	7.63664e-05	-7.63664e-05	7.63664e-05	-0.000910858	4.53195
0.0401201	-7.63664e-05	0.24	7.63664e-05	7.63664e-05	-7.63664e-05	7.63664e-05	-0.00026437	5.1263
0.0451351	-7.63664e-05	0.27	7.63664e-05	7.63664e-05	-7.63664e-05	7.63664e-05	-9.07974e-05	5.72065
0.0501502	-7.63664e-05	0.3	7.63664e-05	7.63664e-05	-7.63664e-05	7.63664e-05	-2.95479e-05	6.31501
0.0551652	-7.63664e-05	0.33	7.63664e-05	7.63664e-05	-7.63664e-05	7.63664e-05	3.11193e-05	6.90936
0.06	-7.63664e-05	0.36	7.63664e-05	7.63664e-05	-7.63664e-05	7.63664e-05	4.67164e-05	7.50371
0.0601802	-7.63664e-05	0.39	7.63664e-05	7.63664e-05	-7.63664e-05	7.63664e-05	6.45664e-05	8.09807
0.0651952	-7.63664e-05	0.42	7.63664e-05	7.63664e-05	-7.63664e-05	7.63664e-05	6.88911e-05	8.69242
0.0702102	-7.63664e-05	0.45	7.63664e-05	7.63664e-05	-7.63664e-05	7.63664e-05	7.3595e-05	9.28678
0.0752252	-7.63664e-05	0.48	7.63664e-05	7.63664e-05	-7.63664e-05	7.63664e-05	7.46691e-05	9.88113
0.0802402	-7.63664e-05	0.51	7.63664e-05	7.63664e-05	-7.63664e-05	7.63664e-05	7.57802e-05	10.4755
0.0852553	-7.63664e-05	0.54	7.63664e-05	7.63664e-05	-7.63664e-05	7.63664e-05	7.60194e-05	11.0698
0.09	-7.63664e-05	0.57	7.63664e-05	7.63664e-05	-7.63664e-05	7.63664e-05	7.62548e-05	11.6642
0.0902703	-7.63664e-05	0.6	7.63664e-05	7.63664e-05	-7.63664e-05	7.63664e-05	7.63025e-05	12.2585
0.0952853	-7.63664e-05	0.63	7.63664e-05	7.63664e-05	-7.63664e-05	7.63664e-05	7.63473e-05	12.8529
0.1003	-7.63664e-05	0.66	7.63664e-05	7.63664e-05	-7.63664e-05	7.63664e-05	7.63558e-05	13.4473
0.105315	-7.63664e-05	0.69	7.63664e-05	7.63664e-05	-7.63664e-05	7.63664e-05	7.63635e-05	14.0416
0.11033	-7.63664e-05	0.72	7.63664e-05	7.63664e-05	-7.63664e-05	7.63664e-05	7.63649e-05	14.636
0.115345	-7.63664e-05	0.75	7.63664e-05	7.63664e-05	-7.63664e-05	7.63664e-05	7.6366e-05	15.2303
0.12	-7.63664e-05	0.78	7.63664e-05	7.63664e-05	-7.63664e-05	7.63664e-05	7.63662e-05	15.8247
0.12036	-7.63664e-05	0.81	7.63664e-05	7.63664e-05	-7.63664e-05	7.63664e-05	7.63664e-05	16.419
0.125375	-7.63664e-05	0.84	7.63664e-05	7.63664e-05	-7.63664e-05	7.63664e-05	7.63664e-05	17.0134
0.13039	-7.63664e-05	0.87	7.63664e-05	7.63664e-05	-7.63664e-05	7.63664e-05	7.63664e-05	17.6077
0.135405	-7.63664e-05	0.9	7.63664e-05	7.63664e-05	-7.63664e-05	7.63664e-05	7.63664e-05	18.2021
0.14042	-7.63664e-05	0.93	7.63664e-05	7.63664e-05	-7.63664e-05	7.63664e-05	7.63664e-05	18.7964
0.145435	-7.63664e-05	0.96	7.63664e-05	7.63664e-05	-7.63664e-05	7.63664e-05	7.63664e-05	19.3908
0.15	-7.63664e-05	0.99	7.63664e-05	7.63664e-05	-7.63664e-05	7.63664e-05	7.63664e-05	19.9851
0.15045	-7.63664e-05	1.02	7.63664e-05	7.63664e-05	-7.63664e-05	7.63664e-05	7.63664e-05	20.5795
0.155465	-7.63664e-05	1.05	7.63664e-05	7.63664e-05	-7.63664e-05	7.63664e-05	7.63664e-05	21.1738
0.16048	-7.63664e-05	1.08	7.63664e-05	7.63664e-05	-7.63664e-05	7.63664e-05	7.63664e-05	21.7682
0.165495	-7.63664e-05	1.11	7.63664e-05	7.63664e-05	-7.63664e-05	7.63664e-05	7.63664e-05	22.3626
0.170511	-7.63664e-05	1.14	7.63664e-05	7.63664e-05	-7.63664e-05	7.63664e-05	7.63664e-05	22.9569
0.175526	-7.63664e-05	1.17	7.63664e-05	7.63664e-05	-7.63664e-05	7.63664e-05	7.63664e-05	23.5513
0.18	-7.63664e-05	1.2	7.63664e-05	7.63664e-05	-7.63664e-05	7.63664e-05	7.63664e-05	24.1456
0.180541	-7.63664e-05	1.23	7.63664e-05	7.63664e-05	-7.63664e-05	7.63664e-05	7.63664e-05	24.74
0.185556	-7.63664e-05	1.26	7.63664e-05	7.63664e-05	-7.63664e-05	7.63664e-05	7.63664e-05	25.3343
0.190571	-7.63664e-05	1.29	7.63664e-05	7.63664e-05	-7.63664e-05	7.63664e-05	7.63664e-05	25.9287
0.195586	-7.63664e-05	1.32	7.63664e-05	7.63664e-05	-7.63664e-05	7.63664e-05	7.63664e-05	26.523
0.200601	-7.63664e-05	1.35	7.63664e-05	7.63664e-05	-7.63664e-05	7.63664e-05	7.63664e-05	27.1174
0.205616	-7.63664e-05	1.38	7.63664e-05	7.63664e-05	-7.63664e-05	7.63664e-05	7.63664e-05	27.7117
0.21	-7.63664e-05	1.41	7.63664e-05	7.63664e-05	-7.63664e-05	7.63664e-05	7.63664e-05	28.3061
0.210631	-7.63664e-05	1.44	7.63664e-05	7.63664e-05	-7.63664e-05	7.63664e-05	7.63664e-05	28.9004
0.215646	-7.63664e-05	1.47	7.63664e-05	7.63664e-05	-7.63664e-05	7.63664e-05	7.63664e-05	29.4948
0.220661	-7.63664e-05	1.5	7.63664e-05	7.63664e-05	-7.63664e-05	7.63664e-05	7.63664e-05	30.0892
0.225676	-7.63664e-05	1.53	7.63664e-05	7.63664e-05	-7.63664e-05	7.63664e-05	7.63664e-05	30.6835
0.230691	-7.63664e-05	1.56	7.63664e-05	7.63664e-05	-7.63664e-05	7.63664e-05	7.63664e-05	31.2779
0.235706	-7.63664e-05	1.59	7.63664e-05	7.63664e-05	-7.63664e-05	7.63664e-05	7.63664e-05	31.8722
0.24	-7.63664e-05	1.62	7.63664e-05	7.63664e-05	-7.63664e-05	7.63664e-05	7.63664e-05	32.4666
0.240721	-7.63664e-05	1.65	7.63664e-05	7.63664e-05	-7.63664e-05	7.63664e-05	7.63664e-05	33.0609
0.245736	-7.63664e-05	1.68	7.63664e-05	7.63664e-05	-7.63664e-05	7.63664e-05	7.63664e-05	33.6553
0.250751	-7.63664e-05	1.71	7.63664e-05	7.63664e-05	-7.63664e-05	7.63664e-05	7.63664e-05	34.2496
0.255766	-7.63664e-05	1.74	7.63664e-05	7.63664e-05	-7.63664e-05	7.63664e-05	7.63664e-05	34.844
0.260781	-7.63664e-05	1.77	7.63664e-05	7.63664e-05	-7.63664e-05	7.63664e-05	7.63664e-05	35.4383
0.265796	-7.63664e-05	1.8	7.63664e-05	7.63664e-05	-7.63664e-05	7.63664e-05	7.63664e-05	36.0327
0.27	-7.63664e-05	1.83	7.63664e-05	7.63664e-05	-7.63664e-05	7.63664e-05	7.63664e-05	36.627
0.270811	-7.63664e-05	1.86	7.63664e-05	7.63664e-05	-7.63664e-05	7.63664e-05	7.63664e-05	37.2214
0.275826	-7.63664e-05	1.89	7.63664e-05	7.63664e-05	-7.63664e-05	7.63664e-05	7.63664e-05	37.8158
0.280841	-7.63664e-05	1.92	7.63664e-05	7.63664e-05	-7.63664e-05	7.63664e-05	7.63664e-05	38.4101
0.285856	-7.63664e-05	1.95	7.63664e-05	7.63664e-05	-7.63664e-05	7.63664e-05	7.63664e-05	39.0045
0.290871	-7.63664e-05	1.98	7.63664e-05	7.63664e-05	-7.63664e-05	7.63664e-05	7.63664e-05	39.5988
0.295886	-7.63664e-05	2.01	7.63664e-05	7.63664e-05	-7.63664e-05	7.63664e-05	7.63664e-05	40.1932
0.3	-7.63664e-05	2.04	7.63664e-05	7.63664e-05	-7.63664e-05	7.63664e-05	7.63664e-05	40.7875
0.300901	-7.63664e-05	2.07	7.63664e-05	7.63664e-05	-7.63664e-05	7.63664e-05	7.63664e-05	41.3819
0.305916	-7.63664e-05	2.1	7.63664e-05	7.63664e-05	-7.63664e-05	7.63664e-05	7.63664e-05	41.9762
0.310931	-7.63664e-05	2.13	7.63664e-05	7.63664e-05	-7.63664e-05	7.63664e-05	7.63664e-05	42.5706
0.315946	-7.63664e-05	2.16	7.63664e-05	7.63664e-05	-7.63664e-05	7.63664e-05	7.63664e-05	43.1649
0.320961	-7.63664e-05	2.19	7.63664e-05	7.63664e-05	-7.63664e-05	7.63664e-05	7.63664e-05	43.7593
0.325976	-7.63664e-05	2.22	7.63664e-05	7.63664e-05	-7.63664e-05	7.63664e-05	7.63664e-05	44.3536
0.33	-7.63664e-05	2.25	7.63664e-05	7.63664e-05	-7.63664e-05	7.63664e-05	7.63664e-05	44.948
0.330991	-7.63664e-05	2.28	7.63664e-05	7.63664e-05	-7.63664e-05	7.63664e-05	7.63664e-05	45.5423
0.336006	-7.63664e-05	2.31	7.63664e-05	7.63664e-05	-7.63664e-05	7.63664e-05	7.63664e-05	46.1367
0.341021	-7.63664e-05	2.34	7.63664e-05	7.63664e-05	-7.63664e-05	7.63664e-05	7.63664e-05	46.7311
0.346036	-7.63664e-05	2.37	7.63664e-05	7.63664e-05	-7.63664e-05	7.63664e-05	7.63664e-05	47.3254
0.351051	-7.63664e-05	2.4	7.63662e-05	7.63662e-05	-7.63662e-05	7.63662e-05	7.63664e-05	47.9198
0.356066	-7.63664e-05	2.43	7.63649e-05	7.63649e-05	-7.63649e-05	7.63649e-05	7.63664e-05	48.5141
0.36	-7.63664e-05	2.46	7.63558e-05	7.63558e-05	-7.63558e-05	7.63558e-05	7.63664e-05	49.1085
0.361081	-7.63664e-05	2.49	7.63025e-05	7.63025e-05	-7.63025e-05	7.63025e-05	7.63664e-05	49.7028
0.366096	-7.63664e-05	2.52	7.60194e-05	7.60194e-05	-7.60194e-05	7.60194e-05	7.63664e-05	50.2972
0.371111	-7.63664e-05	2.55	7.46691e-05	7.46691e-05	-7.46691e-05	7.46691e-05	7.63664e-05	50.8915
0.376126	-7.63664e-05	2.58	6.88911e-05	6.88911e-05	-6.88911e-05	6.88911e-05	7.63664e-05	51.4859
0.381141	-7.63664e-05	2.61	4.67164e-05	4.67164e-05	-4.67164e-05	4.67164e-05	7.63664e-05	52.0802
0.386156	-7.63664e-05	2.64	-2.95479e-05	-2.95479e-05	2.95479e-05	-2.95479e-05	7.63664e-05	52.6746
0.39	-7.63664e-05	2.67	-0.00026437	-0.00026437	0.00026437	-0.00026437	7.63664e-05	53.2689
0.391171	-7.63664e-05	2.7	-0.000910858	-0.000910858	0.000910858	-0.000910858	7.63664e-05	53.8633
0.396186	-7.63664e-05	2.73	-0.00249965	-0.00249965	0.00249965	-0.00249965	7.63664e-05	54.4577
0.401201	-7.63664e-05	2.76	-0.00493195	-0.00493195	0.00597725	-0.00493195	7.63664e-05	55.052
0.406216	-7.63664e-05	2.79	-0.009019	-0.009019	0.0127356	-0.009019	7.63664e-05	55.6464
0.411231	-7.63664e-05	2.82	-0.00982599	-0.00982599	0.024344	-0.00982599	7.63664e-05	56.2407
0.416246	-7.63664e-05	2.85	-0.00700052	-0.00700052	0.0418437	-0.00700052	7.63664e-05	56.8351
0.42	-7.63664e-05	2.88	0.00576804	0.00576804	0.0647314	0.00576804	7.63664e-05	57.4294
0.421261	-7.63664e-05	2.91	0.00949478	0.00949478	0.0901568	0.00949478	7.63664e-05	58.0238
0.426276	-7.63664e-05	2.94	0.00226122	0.00226122	0.11307	0.00226122	7.63664e-05	58.6181
0.431291	-7.63664e-05	2.97	0.00621481	0.00621481	0.127699	0.00621481	7.63664e-05	59.2125
0.436306	-7.63664e-05	3	-0.0103657	-0.0103657	0.129878	-0.0103657	7.63664e-05	59.8068
0.441321	-7.63664e-05	3.03	-0.00629702	-0.00629702	0.118957	-0.00629702	7.63664e-05	60.4012
0.446336	-7.63664e-05	3.06	-9.07974e-05	-9.07974e-05	0.0981163	-9.07974e-05	7.63664e-05	60.9955
0.45	-7.63664e-05	3.09	0.00250383	0.00250383	0.0728736	0.00250383	7.63664e-05	61.5899
0.451351	-7.63664e-05	3.12	0.00341536	0.00341536	0.0487333	0.00341536	7.63664e-05	62.1842
0.456366	-7.63664e-05	3.15	0.00341723	0.00341723	0.0293354	0.00341723	7.63664e-05	62.7786
0.461381	-7.63664e-05	3.18	0.00246574	0.00246574	0.015885	0.00246574	7.63664e-05	63.373
0.466396	-7.63664e-05	3.21	0.00191525	0.00191525	0.00772471	0.00191525	7.63664e-05	63.9673
0.471411	-7.63664e-05	3.24	0.00186906	0.00186906	0.00335742	0.00186906	7.63664e-05	64.5617
0.476426	-7.63664e-05	3.27	0.000341171	0.000341171	0.00128485	0.000341171	7.63664e-05	65.156
0.48	-7.63664e-05	3.3	0.0004034	0.0004034	0.000409608	0.0004034	7.63664e-05	65.7504
0.481441	-7.63664e-05	3.33	0.000268543	0.000268543	7.9889e-05	0.000268543	7.63664e-05	66.3447
0.486456	-7.63664e-05	3.36	3.11193e-05	3.11193e-05	-3.11193e-05	3.11193e-05	7.63664e-05	66.9391
0.491471	-7.63664e-05	3.39	6.45664e-05	6.45664e-05	-6.45664e-05	6.45664e-05	7.63664e-05	67.5334
0.496486	-7.63664e-05	3.42	7.3595e-05	7.3595e-05	-7.3595e-05	7.3595e-05	7.63664e-05	68.1278
0.501502	-7.63664e-05	3.45	7.57802e-05	7.57802e-05	-7.57802e-05	7.57802e-05	7.63664e-05	68.7221
0.506517	-7.63664e-05	3.48	7.62548e-05	7.62548e-05	-7.62548e-05	7.62548e-05	7.63664e-05	69.3165
0.51	-7.63664e-05	3.51	7.63473e-05	7.63473e-05	-7.63473e-05	7.63473e-05	7.63664e-05	69.9108
0.511532	-7.63664e-05	3.54	7.63635e-05	7.63635e-05	-7.63635e-05	7.63635e-05	7.63664e-05	70.5052
0.516547	-7.63664e-05	3.57	7.6366e-05	7.6366e-05	-7.6366e-05	7.6366e-05	7.63664e-05	71.0996
0.521562	-7.63664e-05	3.6	7.63664e-05	7.63664e-05	-7.63664e-05	7.63664e-05	7.63664e-05	71.6939
0.526577	-7.63664e-05	3.63	7.63664e-05	7.63664e-05	-7.63664e-05	7.63664e-05	7.63664e-05	72.2883
0.531592	-7.63664e-05	3.66	7.63664e-05	7.63664e-05	-7.63664e-05	7.63664e-05	7.63664e-05	72.8826
0.536607	-7.63664e-05	3.69	7.63664e-05	7.63664e-05	-7.63664e-05	7.63664e-05	7.63664e-05	73.477
0.54	-7.63664e-05	3.72	7.63664e-05	7.63664e-05	-7.63664e-05	7.63664e-05	7.63664e-05	74.0713
0.541622	-7.63664e-05	3.75	7.63664e-05	7.63664e-05	-7.63664e-05	7.63664e-05	7.63664e-05	74.6657
0.546637	-7.63664e-05	3.78	7.63664e-05	7.63664e-05	-7.63664e-05	7.63664e-05	7.63664e-05	75.26
0.551652	-7.63664e-05	3.81	7.63664e-05	7.63664e-05	-7.63664e-05	7.63664e-05	7.63664e-05	75.8544
0.556667	-7.63664e-05	3.84	7.63664e-05	7.63664e-05	-7.63664e-05	7.63664e-05	7.63664e-05	76.4487
0.561682	-7.63664e-05	3.87	7.63664e-05	7.63664e-05	-7.63664e-05	7.63664e-05	7.63664e-05	77.0431
0.566697	-7.63664e-05	3.9	7.63664e-05	7.63664e-05	-7.63664e-05	7.63664e-05	7.63664e-05	77.6374
0.57	-7.63664e-05	3.93	7.63664e-05	7.63664e-05	-7.63664e-05	7.63664e-05	7.63664e-05	78.2318
0.571712	-7.63664e-05	3.96	7.63664e-05	7.63664e-05	-7.63664e-05	7.63664e-05	7.63664e-05	78.8262
0.576727	-7.63664e-05	3.99	7.63664e-05	7.63664e-05	-7.63664e-05	7.63664e-05	7.63664e-05	79.4205
0.581742	-7.63664e-05	4.02	7.63664e-05	7.63664e-05	-7.63664e-05	7.63664e-05	7.63664e-05	80.0149
0.586757	-7.63664e-05	4.05	7.63664e-05	7.63664e-05	-7.63664e-05	7.63664e-05	7.63664e-05	80.6092
0.591772	-7.63664e-05	4.08	7.63664e-05	7.63664e-05	-7.63664e-05	7.63664e-05	7.63664e-05	81.2036
0.596787	-7.63664e-05	4.11	7.63664e-05	7.63664e-05	-7.63664e-05	7.63664e-05	7.63664e-05	81.7979
0.6	-7.63664e-05	4.14	7.63664e-05	7.63664e-05	-7.63664e-05	7.63664e-05	7.63664e-05	82.3923
0.601802	-7.63664e-05	4.17	7.63664e-05	7.63664e-05	-7.63664e-05	7.63664e-05	7.63664e-05	82.9866
0.606817	-7.63664e-05	4.2	7.63664e-05	7.63664e-05	-7.63664e-05	7.63664e-05	7.63664e-05	83.581
0.611832	-7.63664e-05	4.23	7.63664e-05	7.63664e-05	-7.63664e-05	7.63664e-05	7.63664e-05	84.1753
0.616847	-7.63664e-05	4.26	7.63664e-05	7.63664e-05	-7.63664e-05	7.63664e-05	7.63664e-05	84.7697
0.621862	-7.63664e-05	4.29	7.63664e-05	7.63664e-05	-7.63664e-05	7.63664e-05	7.63664e-05	85.364
0.626877	-7.63664e-05	4.32	7.63664e-05	7.63664e-05	-7.63664e-05	7.63664e-05	7.63664e-05	85.9584
0.63	-7.63664e-05	4.35	7.63664e-05	7.63664e-05	-7.63664e-05	7.63664e-05	7.63664e-05	86.5527
0.631892	-7.63664e-05	4.38	7.63664e-05	7.63664e-05	-7.63664e-05	7.63664e-05	7.63664e-05	87.1471
0.636907	-7.63664e-05	4.41	7.63664e-05	7.63664e-05	-7.63664e-05	7.63664e-05	7.63664e-05	87.7415
0.641922	-7.63664e-05	4.44	7.63664e-05	7.63664e-05	-7.63664e-05	7.63664e-05	7.63664e-05	88.3358
0.646937	-7.63664e-05	4.47	7.63664e-05	7.63664e-05	-7.63664e-05	7.63664e-05	7.63664e-05	88.9302
0.651952	-7.63664e-05	4.5	7.63664e-05	7.63664e-05	-7.63664e-05	7.63664e-05	7.63664e-05	89.5245
0.656967	-7.63664e-05	4.53	7.63664e-05	7.63664e-05	-7.63664e-05	7.63664e-05	7.63664e-05	90.1189
0.66	-7.63664e-05	4.56	7.63664e-05	7.63664e-05	-7.63664e-05	7.63664e-05	7.63664e-05	90.7132
0.661982	-7.63664e-05	4.59	7.63664e-05	7.63664e-05	-7.63664e-05	7.63664e-05	7.63664e-05	91.3076
0.666997	-7.63664e-05	4.62	7.63664e-05	7.63664e-05	-7.63664e-05	7.63664e-05	7.63664e-05	91.9019
0.672012	-7.63664e-05	4.65	7.63664e-05	7.63664e-05	-7.63664e-05	7.63664e-05	0.000268543	92.4963
0.677027	-7.63664e-05	4.68	7.63664e-05	7.63664e-05	-7.63664e-05	7.63664e-05	0.000341171	93.0906
0.682042	-7.63664e-05	4.71	7.63664e-05	7.63664e-05	-7.63664e-05	7.63664e-05	0.0004034	93.685
0.687057	-7.63664e-05	4.74	7.63664e-05	7.63664e-05	-7.63664e-05	7.63664e-05	0.00186906	94.2793
0.69	-7.63664e-05	4.77	7.63664e-05	7.63664e-05	-7.63664e-05	7.63664e-05	0.00191525	94.8737
0.692072	-7.63664e-05	4.8	7.63664e-05	7.63664e-05	-7.63664e-05	7.63664e-05	0.00226122	95.4681
0.697087	-7.63664e-05	4.83	7.63664e-05	7.63664e-05	-7.63664e-05	7.63664e-05	0.00246574	96.0624
0.702102	-7.63664e-05	4.86	7.63664e-05	7.63664e-05	-7.63664e-05	7.63664e-05	0.00250383	96.6568
0.707117	-7.63664e-05	4.89	7.63664e-05	7.63664e-05	-7.63664e-05	7.63664e-05	0.00341536	97.2511
0.712132	-7.63664e-05	4.92	7.63664e-05	7.63664e-05	-7.63664e-05	7.63664e-05	0.00341723	97.8455
0.717147	-7.63664e-05	4.95	7.63664e-05	7.63664e-05	-7.63664e-05	7.63664e-05	0.00576804	98.4398
0.72	-7.63664e-05	4.98	7.63664e-05	7.63664e-05	-7.63664e-05	7.63664e-05	0.00621481	99.0342
0.722162	-7.63664e-05	5.01	7.63664e-05	7.63664e-05	-7.63664e-05	7.63664e-05	0.00949478	99.6285
0.727177	-7.63664e-05
0.732192	-7.63664e-05
0.737207	-7.63664e-05
0.742222	-7.63664e-05
0.747237	-7.63664e-05
0.75	-7.63664e-05
0.752252	-7.63664e-05
0.757267	-7.63664e-05
0.762282	-7.63664e-05
0.767297	-7.63664e-05
0.772312	-7.63664e-05
0.777327	-7.63664e-05
0.78	-7.63664e-05
0.782342	-7.63664e-05
0.787357	-7.63664e-05
0.792372	-7.63664e-05
0.797387	-7.63664e-05
0.802402	-7.63664e-05
0.807417	-7.63664e-05
0.81	-7.63664e-05
0.812432	-7.63664e-05
0.817447	-7.63664e-05
0.822462	-7.63664e-05
0.827477	-7.63664e-05
0.832492	-7.63664e-05
0.837508	-7.63664e-05
0.84	-7.63664e-05
0.842523	-7.63664e-05
0.847538	-7.63664e-05
0.852553	-7.63664e-05
0.857568	-7.63664e-05
0.862583	-7.63664e-05
0.867598	-7.63664e-05
0.87	-7.63664e-05
0.872613	-7.63664e-05
0.877628	-7.63664e-05
0.882643	-7.63664e-05
0.887658	-7.63664e-05
0.892673	-7.63664e-05
0.897688	-7.63664e-05
0.9	-7.63664e-05
0.902703	-7.63664e-05
0.907718	-7.63664e-05
0.912733	-7.63664e-05
0.917748	-7.63664e-05
0.922763	-7.63664e-05
0.927778	-7.63664e-05
0.93	-7.63664e-05
0.932793	-7.63664e-05
0.937808	-7.63664e-05
0.942823	-7.63664e-05
0.947838	-7.63664e-05
0.952853	-7.63664e-05
0.957868	-7.63664e-05
0.96	-7.63664e-05
0.962883	-7.63664e-05
0.967898	-7.63664e-05
0.972913	-7.63664e-05
0.977928	-7.63664e-05
0.982943	-7.63664e-05
0.987958	-7.63664e-05
0.99	-7.63664e-05
0.992973	-7.63664e-05
0.997988	-7.63664e-05
1.003	-7.63664e-05
1.00802	-7.63664e-05
1.01303	-7.63664e-05
1.01805	-7.63664e-05
1.02	-7.63664e-05
1.02306	-7.63664e-05
1.02808	-7.63664e-05
1.03309	-7.63664e-05
1.03811	-7.63664e-05
1.04312	-7.63664e-05
1.04814	-7.63664e-05
1.05	-7.63664e-05
1.05315	-7.63664e-05
1.05817	-7.63664e-05
1.06318	-7.63664e-05
1.0682	-7.63664e-05
1.07321	-7.63664e-05
1.07823	-7.63664e-05
1.08	-7.63664e-05
1.08324	-7.63664e-05
1.08826	-7.63664e-05
1.09327	-7.63664e-05
1.09829	-7.63664e-05
1.1033	-7.63664e-05
1.10832	-7.63664e-05
1.11	-7.63664e-05
1.11333	-7.63664e-05
1.11835	-7.63664e-05
1.12336	-7.63664e-05
1.12838	-7.63664e-05
1.13339	-7.63664e-05
1.13841	-7.63664e-05
1.14	-7.63664e-05
1.14342	-7.63664e-05
1.14844	-7.63664e-05
1.15345	-7.63664e-05
1.15847	-7.63664e-05
1.16348	-7.63664e-05
1.1685	-7.63664e-05
1.17	-7.63664e-05
1.17351	-7.63664e-05
1.17853	-7.63664e-05
1.18354	-7.63664e-05
1.18856	-7.63664e-05
1.19357	-7.63664e-05
1.19859	-7.63664e-05
1.2	-7.63664e-05
1.2036	-7.63664e-05
1.20862	-7.63664e-05
1.21363	-7.63664e-05
1.21865	-7.63664e-05
1.22366	-7.63664e-05
1.22868	-7.63664e-05
1.23	-7.63664e-05
1.23369	-7.63664e-05
1.23871	-7.63664e-05
1.24372	-7.63664e-05
1.24874	-7.63664e-05
1.25375	-7.63664e-05
1.25877	-7.63664e-05
1.26	-7.63664e-05
1.26378	-7.63664e-05
1.2688	-7.63664e-05
1.27381	-7.63664e-05
1.27883	-7.63664e-05
1.28384	-7.63664e-05
1.28886	-7.63664e-05
1.29	-7.63664e-05
1.29387	-7.63664e-05
1.29889	-7.63664e-05
1.3039	-7.63664e-05
1.30892	-7.63664e-05
1.31393	-7.63664e-05
1.31895	-7.63664e-05
1.32	-7.63664e-05
1.32396	-7.63664e-05
1.32898	-7.63664e-05
1.33399	-7.63664e-05
1.33901	-7.63664e-05
1.34402	-7.63664e-05
1.34904	-7.63664e-05
1.35	-7.63664e-05
1.35405	-7.63664e-05
1.35907	-7.63664e-05
1.36408	-7.63664e-05
1.3691	-7.63664e-05
1.37411	-7.63664e-05
1.37913	-7.63664e-05
1.38	-7.63664e-05
1.38414	-7.63664e-05
1.38916	-7.63664e-05
1.39417	-7.63664e-05
1.39919	-7.63664e-05
1.4042	-7.63664e-05
1.40922	-7.63664e-05
1.41	-7.63664e-05
1.41423	-7.63664e-05
1.41925	-7.63664e-05
1.42426	-7.63664e-05
1.42928	-7.63664e-05
1.43429	-7.63664e-05
1.43931	-7.63664e-05
1.44	-7.63664e-05
1.44432	-7.63664e-05
1.44934	-7.63664e-05
1.45435	-7.63664e-05
1.45937	-7.63664e-05
1.46438	-7.63664e-05
1.4694	-7.63664e-05
1.47	-7.63664e-05
1.47441	-7.63664e-05
1.47943	-7.63664e-05
1.48444	-7.63664e-05
1.48946	-7.63664e-05
1.49447	-7.63664e-05
1.49949	-7.63664e-05
1.5	-7.63664e-05
1.5045	-7.63664e-05
1.50952	-7.63664e-05
1.51453	-7.63664e-05
1.51955	-7.63664e-05
1.52456	-7.63664e-05
1.52958	-7.63664e-05
1.53	-7.63664e-05
1.53459	-7.63664e-05
1.53961	-7.63664e-05
1.54462	-7.63664e-05
1.54964	-7.63664e-05
1.55465	-7.63664e-05
1.55967	-7.63664e-05
1.56	-7.63664e-05
1.56468	-7.63664e-05
1.5697	-7.63664e-05
1.57471	-7.63664e-05
1.57973	-7.63664e-05
1.58474	-7.63664e-05
1.58976	-7.63664e-05
1.59	-7.63664e-05
1.59477	-7.63664e-05
1.59979	-7.63664e-05
1.6048	-7.63664e-05
1.60982	-7.63664e-05
1.61483	-7.63664e-05
1.61985	-7.63664e-05
1.62	-7.63664e-05
1.62486	-7.63664e-05
1.62988	-7.63664e-05
1.63489	-7.63664e-05
1.63991	-7.63664e-05
1.64492	-7.63664e-05
1.64994	-7.63664e-05
1.65	-7.63664e-05
1.65495	-7.63664e-05
1.65997	-7.63664e-05
1.66498	-7.63664e-05
1.67	-7.63664e-05
1.67502	-7.63664e-05
1.68	-7.63664e-05
1.68003	-7.63664e-05
1.68505	-7.63664e-05
1.69006	-7.63664e-05
1.69508	-7.63664e-05
1.70009	-7.63664e-05
1.70511	-7.63664e-05
1.71	-7.63664e-05
1.71012	-7.63664e-05
1.71514	-7.63664e-05
1.72015	-7.63664e-05
1.72517	-7.63664e-05
1.73018	-7.63664e-05
1.7352	-7.63664e-05
1.74	-7.63664e-05
1.74021	-7.63664e-05
1.74523	-7.63664e-05
1.75024	-7.63664e-05
1.75526	-7.63664e-05
1.76027	-7.63664e-05
1.76529	-7.63664e-05
1.77	-7.63664e-05
1.7703	-7.63664e-05
1.77532	-7.63664e-05
1.78033	-7.63664e-05
1.78535	-7.63664e-05
1.79036	-7.63664e-05
1.79538	-7.63664e-05
1.8	-7.63664e-05
1.80039	-7.63664e-05
1.80541	-7.63664e-05
1.81042	-7.63664e-05
1.81544	-7.63664e-05
1.82045	-7.63664e-05
1.82547	-7.63664e-05
1.83	-7.63664e-05
1.83048	-7.63664e-05
1.8355	-7.63664e-05
1.84051	-7.63664e-05
1.84553	-7.63664e-05
1.85054	-7.63664e-05
1.85556	-7.63664e-05
1.86	-7.63664e-05
1.86057	-7.63664e-05
1.86559	-7.63664e-05
1.8706	-7.63664e-05
1.87562	-7.63664e-05
1.88063	-7.63664e-05
1.88565	-7.63664e-05
1.89	-7.63664e-05
1.89066	-7.63664e-05
1.89568	-7.63664e-05
1.90069	-7.63664e-05
1.90571	-7.63664e-05
1.91072	-7.63664e-05
1.91574	-7.63664e-05
1.92	-7.63664e-05
1.92075	-7.63664e-05
1.92577	-7.63664e-05
1.93078	-7.63664e-05
1.9358	-7.63664e-05
1.94081	-7.63664e-05
1.94583	-7.63664e-05
1.95	-7.63664e-05
1.95084	-7.63664e-05
1.95586	-7.63664e-05
1.96087	-7.63664e-05
1.96589	-7.63664e-05
1.9709	-7.63664e-05
1.97592	-7.63664e-05
1.98	-7.63664e-05
1.98093	-7.63664e-05
1.98595	-7.63664e-05
1.99096	-7.63664e-05
1.99598	-7.63664e-05
2.00099	-7.63664e-05
2.00601	-7.63664e-05
2.01	-7.63664e-05
2.01102	-7.63664e-05
2.01604	-7.63664e-05
2.02105	-7.63664e-05
2.02607	-7.63664e-05
2.03108	-7.63664e-05
2.0361	-7.63664e-05
2.04	-7.63664e-05
2.04111	-7.63664e-05
2.04613	-7.63664e-05
2.05114	-7.63664e-05
2.05616	-7.63664e-05
2.06117	-7.63664e-05
2.06619	-7.63664e-05
2.07	-7.63664e-05
2.0712	-7.63664e-05
2.07622	-7.63664e-05
2.08123	-7.63664e-05
2.08625	-7.63664e-05
2.09126	-7.63664e-05
2.09628	-7.63664e-05
2.1	-7.63664e-05
2.10129	-7.63664e-05
2.10631	-7.63664e-05
2.11132	-7.63664e-05
2.11634	-7.63664e-05
2.12135	-7.63664e-05
2.12637	-7.63664e-05
2.13	-7.63664e-05
2.13138	-7.63664e-05
2.1364	-7.63664e-05
2.14141	-7.63664e-05
2.14643	-7.63664e-05
2.15144	-7.63664e-05
2.15646	-7.63664e-05
2.16	-7.63664e-05
2.16147	-7.63664e-05
2.16649	-7.63664e-05
2.1715	-7.63664e-05
2.17652	-7.63664e-05
2.18153	-7.63664e-05
2.18655	-7.63664e-05
2.19	-7.63664e-05
2.19156	-7.63664e-05
2.19658	-7.63664e-05
2.20159	-7.63664e-05
2.20661	-7.63664e-05
2.21162	-7.63664e-05
2.21664	-7.63664e-05
2.22	-7.63664e-05
2.22165	-7.63664e-05
2.22667	-7.63664e-05
2.23168	-7.63664e-05
2.2367	-7.63664e-05
2.24171	-7.63664e-05
2.24673	-7.63664e-05
2.25	-7.63664e-05
2.25174	-7.63664e-05
2.25676	-7.63664e-05
2.26177	-7.63664e-05
2.26679	-7.63664e-05
2.2718	-7.63664e-05
2.27682	-7.63664e-05
2.28	-7.63664e-05
2.28183	-7.63664e-05
2.28685	-7.63664e-05
2.29186	-7.63664e-05
2.29688	-7.63664e-05
2.30189	-7.63664e-05
2.30691	-7.63664e-05
2.31	-7.63664e-05
2.31192	-7.63664e-05
2.31694	-7.63664e-05
2.32195	-7.63664e-05
2.32697	-7.63664e-05
2.33198	-7.63664e-05
2.337	-7.63664e-05
2.34	-7.63664e-05
2.34201	-7.63664e-05
2.34703	-7.63664e-05
2.35204	-7.63664e-05
2.35706	-7.63664e-05
2.36207	-7.63664e-05
2.36709	-7.63664e-05
2.37	-7.63664e-05
2.3721	-7.63664e-05
2.37712	-7.63664e-05
2.38213	-7.63664e-05
2.38715	-7.63664e-05
2.39216	-7.63663e-05
2.39718	-7.63663e-05
2.4	-7.63662e-05
2.40219	-7.63662e-05
2.40721	-7.63661e-05
2.41222	-7.6366e-05
2.41724	-7.63658e-05
2.42225	-7.63655e-05
2.42727	-7.63651e-05
2.43	-7.63649e-05
2.43228	-7.63646e-05
2.4373	-7.63639e-05
2.44231	-7.63629e-05
2.44733	-7.63616e-05
2.45234	-7.63599e-05
2.45736	-7.63574e-05
2.46	-7.63558e-05
2.46237	-7.63542e-05
2.46739	-7.63498e-05
2.4724	-7.63439e-05
2.47742	-7.6336e-05
2.48243	-7.63254e-05
2.48745	-7.63114e-05
2.49	-7.63025e-05
2.49246	-7.62927e-05
2.49748	-7.6268e-05
2.50249	-7.62355e-05
2.50751	-7.61927e-05
2.51252	-7.61365e-05
2.51754	-7.60632e-05
2.52	-7.60194e-05
2.52255	-7.59675e-05
2.52757	-7.58433e-05
2.53258	-7.56824e-05
2.5376	-7.54746e-05
2.54261	-7.5207e-05
2.54763	-7.48636e-05
2.55	-7.46691e-05
2.55264	-7.44242e-05
2.55766	-7.38636e-05
2.56267	-7.31506e-05
2.56769	-7.22466e-05
2.5727	-7.11038e-05
2.57772	-6.96638e-05
2.58	-6.88911e-05
2.58273	-6.78546e-05
2.58775	-6.55887e-05
2.59276	-6.27595e-05
2.59778	-5.92378e-05
2.60279	-5.48675e-05
2.60781	-4.94611e-05
2.61	-4.67164e-05
2.61282	-4.27934e-05
2.61784	-3.45957e-05
2.62285	-2.45482e-05
2.62787	-1.22716e-05
2.63288	2.68193e-06
2.6379	2.08393e-05
2.64	2.95479e-05
2.64291	4.28183e-05
2.64793	6.93401e-05
2.65294	0.000101243
2.65796	0.000139499
2.66297	0.000185229
2.66799	0.00023972
2.67	0.00026437
2.673	0.000304447
2.67802	0.000381087
2.68303	0.000471546
2.68805	0.000577976
2.69306	0.000702797
2.69808	0.000848718
2.7	0.000910858
2.70309	0.00101876
2.70811	0.00121627
2.71312	0.00144494
2.71814	0.00170884
2.72315	0.00201239
2.72817	0.00236042
2.73	0.00249965
2.73318	0.00275814
2.7382	0.00321113
2.74321	0.00372538
2.74823	0.00430724
2.75324	0.00496337
2.75826	0.0057008
2.76	0.00597725
2.76327	0.00652678
2.76829	0.0074488
2.7733	0.00847452
2.77832	0.00961167
2.78333	0.010868
2.78835	0.0122511
2.79	0.0127356
2.79336	0.0137684
2.79838	0.0154271
2.80339	0.0172337
2.80841	0.0191945
2.81342	0.0213147
2.81844	0.0235987
2.82	0.024344
2.82345	0.0260502
2.82847	0.0286712
2.83348	0.0314627
2.8385	0.0344243
2.84351	0.0375537
2.84853	0.0408471
2.85	0.0418437
2.85354	0.0442987
2.85856	0.0479008
2.86357	0.0516438
2.86859	0.055516
2.8736	0.0595035
2.87862	0.0635905
2.88	0.0647314
2.88363	0.0677591
2.88865	0.0719895
2.89366	0.0762601
2.89868	0.0805475
2.90369	0.084827
2.90871	0.0890724
2.91	0.0901568
2.91372	0.0932567
2.91874	0.097352
2.92375	0.10133
2.92877	0.105162
2.93378	0.108819
2.9388	0.112275
2.94	0.11307
2.94381	0.115502
2.94883	0.118474
2.95384	0.121167
2.95886	0.123559
2.96387	0.12563
2.96889	0.127363
2.97	0.127699
2.9739	0.128742
2.97892	0.129755
2.98393	0.130394
2.98895	0.130654
2.99396	0.130531
2.99898	0.130027
3	0.129878
3.00399	0.129146
3.00901	0.127897
3.01402	0.126289
3.01904	0.124337
3.02405	0.122058
3.02907	0.119469
3.03	0.118957
3.03408	0.116594
3.0391	0.113456
3.04411	0.110079
3.04913	0.10649
3.05414	0.102717
3.05916	0.0987884
3.06	0.0981163
3.06417	0.0947318
3.06919	0.0905761
3.0742	0.0863493
3.07922	0.0820789
3.08423	0.0777914
3.08925	0.0735121
3.09	0.0728736
3.09426	0.0692647
3.09928	0.0650717
3.10429	0.0609534
3.10931	0.0569284
3.11432	0.0530133
3.11934	0.0492227
3.12	0.0487333
3.12435	0.045569
3.12937	0.0420626
3.13438	0.038712
3.1394	0.0355234
3.14441	0.0325016
3.14943	0.0296491
3.15	0.0293354
3.15444	0.0269672
3.15946	0.0244554
3.16447	0.0221118
3.16949	0.0199335
3.1745	0.0179164
3.17952	0.0160553
3.18	0.015885
3.18453	0.0143445
3.18955	0.0127775
3.19456	0.0113472
3.19958	0.0100465
3.20459	0.00886766
3.20961	0.00780302
3.21	0.00772471
3.21462	0.00684482
3.21964	0.00598539
3.22465	0.00521717
3.22967	0.00453281
3.23468	0.0039252
3.2397	0.00338753
3.24	0.00335742
3.24471	0.00291336
3.24973	0.00249655
3.25474	0.00213138
3.25976	0.00181251
3.26477	0.00153497
3.26979	0.0012942
3.27	0.00128485
3.2748	0.001086
3.27982	0.000906543
3.28483	0.000752367
3.28985	0.000620333
3.29486	0.000507623
3.29988	0.000411718
3.3	0.000409608
3.30489	0.000330371
3.30991	0.000261591
3.31492	0.000203622
3.31994	0.000154919
3.32495	0.000114129
3.32997	8.00747e-05
3.33	7.9889e-05
3.33498	5.17329e-05
3.34	2.82192e-05
3.34502	8.77227e-06
3.35003	-7.26115e-06
3.35505	-2.0439e-05
3.36	-3.11193e-05
3.36006	-3.12361e-05
3.36508	-4.00552e-05
3.37009	-4.72363e-05
3.37511	-5.30654e-05
3.38012	-5.77826e-05
3.38514	-6.15881e-05
3.39	-6.45664e-05
3.39015	-6.46486e-05
3.39517	-6.71025e-05
3.40018	-6.90639e-05
3.4052	-7.06268e-05
3.41021	-7.18684e-05
3.41523	-7.28517e-05
3.42	-7.3595e-05
3.42024	-7.36281e-05
3.42526	-7.42392e-05
3.43027	-7.47188e-05
3.43529	-7.5094e-05
3.4403	-7.53866e-05
3.44532	-7.56141e-05
3.45	-7.57802e-05
3.45033	-7.57905e-05
3.45535	-7.59268e-05
3.46036	-7.60318e-05
3.46538	-7.61125e-05
3.47039	-7.61743e-05
3.47541	-7.62215e-05
3.48	-7.62548e-05
3.48042	-7.62574e-05
3.48544	-7.62847e-05
3.49045	-7.63053e-05
3.49547	-7.63208e-05
3.50048	-7.63325e-05
3.5055	-7.63413e-05
3.51	-7.63473e-05
3.51051	-7.63479e-05
3.51553	-7.63528e-05
3.52054	-7.63564e-05
3.52556	-7.63591e-05
3.53057	-7.63611e-05
3.53559	-7.63625e-05
3.54	-7.63635e-05
3.5406	-7.63636e-05
3.54562	-7.63644e-05
3.55063	-7.6365e-05
3.55565	-7.63654e-05
3.56066	-7.63657e-05
3.56568	-7.63659e-05
3.57	-7.6366e-05
3.57069	-7.63661e-05
3.57571	-7.63662e-05
3.58072	-7.63662e-05
3.58574	-7.63663e-05
3.59075	-7.63663e-05
3.59577	-7.63664e-05
3.6	-7.63664e-05
3.60078	-7.63664e-05
3.6058	-7.63664e-05
3.61081	-7.63664e-05
3.61583	-7.63664e-05
3.62084	-7.63664e-05
3.62586	-7.63664e-05
3.63	-7.63664e-05
3.63087	-7.63664e-05
3.63589	-7.63664e-05
3.6409	-7.63664e-05
3.64592	-7.63664e-05
3.65093	-7.63664e-05
3.65595	-7.63664e-05
3.66	-7.63664e-05
3.66096	-7.63664e-05
3.66598	-7.63664e-05
3.67099	-7.63664e-05
3.67601	-7.63664e-05
3.68102	-7.63664e-05
3.68604	-7.63664e-05
3.69	-7.63664e-05
3.69105	-7.63664e-05
3.69607	-7.63664e-05
3.70108	-7.63664e-05
3.7061	-7.63664e-05
3.71111	-7.63664e-05
3.71613	-7.63664e-05
3.72	-7.63664e-05
3.72114	-7.63664e-05
3.72616	-7.63664e-05
3.73117	-7.63664e-05
3.73619	-7.63664e-05
3.7412	-7.63664e-05
3.74622	-7.63664e-05
3.75	-7.63664e-05
3.75123	-7.63664e-05
3.75625	-7.63664e-05
3.76126	-7.63664e-05
3.76628	-7.63664e-05
3.77129	-7.63664e-05
3.77631	-7.63664e-05
3.78	-7.63664e-05
3.78132	-7.63664e-05
3.78634	-7.63664e-05
3.79135	-7.63664e-05
3.79637	-7.63664e-05
3.80138	-7.63664e-05
3.8064	-7.63664e-05
3.81	-7.63664e-05
3.81141	-7.63664e-05
3.81643	-7.63664e-05
3.82144	-7.63664e-05
3.82646	-7.63664e-05
3.83147	-7.63664e-05
3.83649	-7.63664e-05
3.84	-7.63664e-05
3.8415	-7.63664e-05
3.84652	-7.63664e-05
3.85153	-7.63664e-05
3.85655	-7.63664e-05
3.86156	-7.63664e-05
3.86658	-7.63664e-05
3.87	-7.63664e-05
3.87159	-7.63664e-05
3.87661	-7.63664e-05
3.88162	-7.63664e-05
3.88664	-7.63664e-05
3.89165	-7.63664e-05
3.89667	-7.63664e-05
3.9	-7.63664e-05
3.90168	-7.63664e-05
3.9067	-7.63664e-05
3.91171	-7.63664e-05
3.91673	-7.63664e-05
3.92174	-7.63664e-05
3.92676	-7.63664e-05
3.93	-7.63664e-05
3.93177	-7.63664e-05
3.93679	-7.63664e-05
3.9418	-7.63664e-05
3.94682	-7.63664e-05
3.95183	-7.63664e-05
3.95685	-7.63664e-05
3.96	-7.63664e-05
3.96186	-7.63664e-05
3.96688	-7.63664e-05
3.97189	-7.63664e-05
3.97691	-7.63664e-05
3.98192	-7.63664e-05
3.98694	-7.63664e-05
3.99	-7.63664e-05
3.99195	-7.63664e-05
3.99697	-7.63664e-05
4.00198	-7.63664e-05
4.007	-7.63664e-05
4.01201	-7.63664e-05
4.01703	-7.63664e-05
4.02	-7.63664e-05
4.02204	-7.63664e-05
4.02706	-7.63664e-05
4.03207	-7.63664e-05
4.03709	-7.63664e-05
4.0421	-7.63664e-05
4.04712	-7.63664e-05
4.05	-7.63664e-05
4.05213	-7.63664e-05
4.05715	-7.63664e-05
4.06216	-7.63664e-05
4.06718	-7.63664e-05
4.07219	-7.63664e-05
4.07721	-7.63664e-05
4.08	-7.63664e-05
4.08222	-7.63664e-05
4.08724	-7.63664e-05
4.09225	-7.63664e-05
4.09727	-7.63664e-05
4.10228	-7.63664e-05
4.1073	-7.63664e-05
4.11	-7.63664e-05
4.11231	-7.63664e-05
4.11733	-7.63664e-05
4.12234	-7.63664e-05
4.12736	-7.63664e-05
4.13237	-7.63664e-05
4.13739	-7.63664e-05
4.14	-7.63664e-05
4.1424	-7.63664e-05
4.14742	-7.63664e-05
4.15243	-7.63664e-05
4.15745	-7.63664e-05
4.16246	-7.63664e-05
4.16748	-7.63664e-05
4.17	-7.63664e-05
4.17249	-7.63664e-05
4.17751	-7.63664e-05
4.2	-7.63664e-05
4.23	-7.63664e-05
4.26	-7.63664e-05
4.29	-7.63664e-05
4.32	-7.63664e-05
4.35	-7.63664e-05
4.38	-7.63664e-05
4.41	-7.63664e-05
4.44	-7.63664e-05
4.47	-7.63664e-05
4.5	-7.63664e-05
4.53	-7.63664e-05
4.56	-7.63664e-05
4.59	-7.63664e-05
4.62	-7.63664e-05
4.65	-7.63664e-05
4.68	-7.63664e-05
4.71	-7.63664e-05
4.74	-7.63664e-05
4.77	-7.63664e-05
4.8	-7.63664e-05
4.83	-7.63664e-05
4.86	-7.63664e-05
4.89	-7.63664e-05
4.92	-7.63664e-05
4.95	-7.63664e-05
4.98	-7.63664e-05
5.01	-7.63664e-05
