# Supplementary material for: Principles of RNA recruitment to viral ribonucleoprotein condensates in a segmented dsRNA virus
Source: eLife journal article supplement (doi:10.7554/elife.68670), 2023-01-26
Supplement: supp [file Book3.xls]

## Sheet: Seg 3
2 hpi	4 hpi	6 hpi
4582.26	5000.95	1.89173e+06
5201.27	1690.96	760326
4245.26	1780.66	98107
3959.55	2225.84	1.78455e+06
4959.13	3749.64	1.34327e+06
2756.41	2132.54	356776
2694.06	2473.19	679326
2384.38	3303.6	412152
2707.22	6458.81	978751
2781.97	8488.05	1.26315e+06
2602.33	5834.03	29964.6
2941.83	5709.82	15046.8
2151.38	4360.39	30288.4
3443.36	5141.87	213361
1926.68	33400.3	15530.5
2544.9	17115	903769
3079.29	6952.48	1.93087e+06
3302.01	5930.52	734048
2330.52	14574.7	1.58082e+06
2500.11	13963.6	471106
2461.76	8501.39	408128
2643.81		1.66923e+06
2676.5		1.28636e+06
2220.74		2.15156e+06
		2.21799e+06
		172033
		822881
		18181.2
		17666
		23878.8

## Sheet: Seg 4
2 hpi	4 hpi	6 hpi
4325.46	10174.6	14379.4
5241.3	2186.74	9805.58
4059.93	2279.58	9338.84
5109.44	3019.04	22823.6
3381.43	5860.5	20554.5
2501.69	1672.11	11882.2
3100.19	4745.78	7948.96
2493.34	8427.46	13907.1
2577.26	7587.79	8943.23
2634.02	13403.2	16012.2
2675.31	8394.69	26531.4
2336.67	6697.53	24236.9
3983.17	4050.07	19536.3
1848.6	7151.28	21912.5
3095.97	50222.1	39635.6
2726.95	24187.6	33066
1798.38	6103.73	23554.7
2231.84	4971.27	19865.8
2574.19	15275.8	25895.9
1458.23	12088.3	14639.2
1216.58	6858.72	13097.3
1316.21
1174.09
1450.96
1110.39

## Sheet: EGFP
2 hpi	4 hpi	6 hpi
38055.1	14379.4	49869.2
20516.9	9805.58	13469.3
24667.5	9338.84	50763.7
21662.9	22823.6	63369.1
32824	20554.5	19922
7818.2	11882.2	32630.3
7834.21	7948.96	73947.6
23866.7	13907.1	23623.5
22910.3	8943.23	32682.6
19784.6	16012.2	25551.1
21612.9	26531.4	68246.1
6933.51	24236.9	19349.6
6750.03	19536.3	12057.9
4760.48	21912.5	26085.1
17321	39635.6	42531.1
14975.7	33066	22045
11337.3	23554.7	40236.3
13147.9	19865.8	89518.5
18337.2	25895.9	87720.7
19289.2	14639.2	65250.7
7107.26	13097.3	141307
7381.86		24933.9
13227.1		24935.2
7927.91		88109.3
10533.8		103465
9466.74		42385.4
		110120
		25472.9
		23093
		14656.9
