# Supplementary material for: Principles of RNA recruitment to viral ribonucleoprotein condensates in a segmented dsRNA virus
Source: eLife journal article supplement (doi:10.7554/elife.68670), 2023-01-26
Supplement: supp [file Fig2 - source data 2 - 17.01.23.xlsx]

## Sheet: Intensities per pixel
Seg3	Seg4	EGFP
79723.3	169132	332089
87.1662	26.0986	40483.9
755.316	331.032	39882.7
1.55948e+06	1.96042e+06	3.66121e+06
713710	1.80611e+06	2.55387e+06
332107	633746	587450
82965.5	210580	280734
365034	755521	849498
3991.36	31.229	22265.9		I
1482.45	1760.96	89373.4
3108.81	19405.4	82688.9
740.702	412.498	87628
600.34	7970.77	51665.2
237.118	56.5464	10286.9
252752	360549	563327
312898	729630	721719
160.814	6313.45	24658.8
781485	766327	1.6429e+06
75.5611	60.1545	11316
195409	195100	823090
5976.99	1430.24	54078.4
1.08003e+06	761360	1.55072e+06
944436	1.29276e+06	3.23335e+06
1.23404e+06	1.22434e+06	3.52117e+06
4902.69	1498.6	13180.8
5067.71	22280.7	38032.4
1.57607e+06	2.01319e+06	3.47723e+06
28274.8	40896.3	76942.7
213.224	2908.59	28144.8
6308.34	232.222	140396
1390.49	9033.22	68231.2
2487.11	15168.4	29928.9
1165.93	1793.48	46324.6
40563.2	25091.3	88111
1734.26	12193.1	49926.8
9.07678e+06	1.20865e+07	1.77014e+07
67681.7	76465.6	129823
5579.09	9232.49	34434.9
4.58778e+06	8.88683e+06	1.17125e+07
39555	26289.7	152764
7735.76	33924.7	46645.8
14.2842	1074.02	6927.47
157.337	841.145	23135.4
4579.02	3888.1	21191.6
8607.64	29435.2	105703
301.071	282.005	26701.3
21934	69097.4	61123.5
9805.31	101207	102050
131509	83192.5	199865
10298.7	2488.18	60773.9
77360.8	176561	311346
1.20519e+06	1.51907e+06	2.43043e+06
41553.7	130991	201145
5692.16	2356.53	40465.1
46243.8	38165	130858
368312	733748	734192
906.733	215.539	91873.5
983777	1.79047e+06	2.16934e+06
187888	205267	672171
665.214	5511.86	39281.9
1.33436e+06	1.7808e+06	3.00435e+06
1.47161e+06	2.90187e+06	6.08308e+06
404.025	14.8785	11667.3
28953.6	51562.6	76016.4
405.744	215.483	60214.5
14103.5	22014.3	47456
61058.1	18066.9	90399
13919.3	48589	87764.1
1.68582e+06	2.852e+06	4.46912e+06
120.132	2331.34	69526.8
8988.39	7214.06	54590.3
1.40057e+06	1.99366e+06	4.72003e+06
83.4219	291.613	7297.75
1159.49	263.297	101090
706.539	417.864	21367.1
1028.02	13790.2	106638
4822.57	22077.2	72576
2653.85	849.595	86687.9
748.33	429.492	98094.1
2500.52	42.693	7703.15
2388.03	27790.5	34726
1615.19	1981.51	6005.38
5441.63	5605.67	155309
936.927	183.692	20424
200.959	768.303	9008.16
108.285	83.1159	7350.87
739.391	52318.8	73206.9
867.429	549.331	27640.3
595.57	49.8648	4763.35
29.3342	781.707	1916.12
14.267	5.10944	2574.38
654.159	29547	126016
8379.6	36120	43090.4
76.5987	136.158	11656.7
329.87	103.342	15912.5
114284	268163	423416
56116.8	18825.5	99068.7
3959.08	10650.3	41782.9
256.709	173.62	5387
30.3592	9702.15	11760.5
1057.74	2007.46	10807.1
53.1883	19.3008	1116.66
1.37297e+06	1.72359e+06	2.01528e+06
81330.2	50237.8	107925
2.05869e+06	2.05606e+06	3.20596e+06
18945.7	29478.6	18752
1600.9	232.71	28409.5
7909.17	13426	24514.3
9289.45	7662.83	39332.8
17890.3	31269	36636.4
66762.1	45401.2	116327
3449.82	3317.36	12384.2
8653.1	8292.73	19213.1
25367.4	3448.89	63303.9
716.721	1096.43	5280.13
261.624	109.703	23164.6
1291.43	1371.2	19442.4
343.566	252.522	14064.9
36.4264	46.5037	2112.7
35.9376	22.5587	1108.26
730.583	372.174	59402.5
3816.78	302.334	67538.2
581.892	235.311	33625.4
218.467	170.184	6408.72
598.898	774.596	3845.98
939.503	537.267	44058.2
344.633	175.816	7057.68
283.779	150.204	5825.96
58.756	196.937	13034.6
89.5203	75.8141	4772.56
424.037	135.352	15804.2
373.514	232.687	16813.8
58.0498	51.6882	4360.39
257762	235316	599577
857.986	11915.5	35986.5
544.146	460.62	24638.4
527109	528909	235264
217780	707632	236359
239943	285730	809012
356184	952094	211906
370448	717959	235844
342.095	4955.98	22001.3
662469	1.04114e+06	335900
2760.92	11844.1	12178.9
2.10161e+06	2.90221e+06	299160
1465.7	1080	47566.7
241.036	93.1534	7206.06
1246.44	585.773	33254.9
67.7736	9119.53	30907.1
627150	1.02736e+06	108204
78.0163	66.0248	1978.69
973107	2.12978e+06	133522
1098.05	9182.24	39346.3
213.29	56.7966	10467.9
21.1401	241.627	1519.44
65.2083	45.4113	11005.7
88.4736	38.0921	11050.9
12.9347	6.57683	2111.73
302.765	241.48	16080.2
17.0224	24.3044	4013.71
140.979	128.859	36152.7
227.339	135.851	38040.4
1042.92	86.7173	14710.9
367.891	91.8954	16393
25.5725	34.7112	6085.01
907.697	548.889	71742.8
76.8231	33.2717	7635.07
2673.61	207.557	41249.7
30361.2	9176.52	146190
97011.8	100877	268719
215777	330358	766928
2050.11	347338	561989
231370	192259	612344
540568	403631	879127
637927	774520	1.17386e+06
13360	34648.7	102031
394772	385112	728432
56214.3	76619.5	161489
265937	103418	1.68283e+06
4908.71	137.41	22863.4
404365	921278	1.68957e+06
3923.94	11126.4	64901.6
838863	1.06399e+06	2.98106e+06
1.25464e+06	1.13015e+06	3.07367e+06
95.9931	55.7509	8114.74
7811.29	13.0576	26974.6
330088	355017	564667
33.1656	24.1535	4799.75
196.417	27.0929	3593.93
25.5983	5.97187	2162.06
463.479	149.585	37140.8
331.122	206.6	33168.8
74106.7	121091	252059
2600.45	146.913	8212.34
468.507	162.595	52814.2
21.2529	7.18953	1972.23
19.332	5.97095	2364.04
152129	257307	421908
257353	217675	662897
80728.8	136218	234576
150017	153655	466561
18560.5	12086.5	55126.4
259963	604163	706475
65860.3	66935.8	42574.7
2552.09	4406.84	5742.06
1293.77	13980.1	29004.4
220954	290320	642285
3.86022e+06	4.7131e+06	3.34046e+06
43296.6	95566	70932.5
35860	38587.8	49863
6.44267e+06	8.15413e+06	5.28693e+06
282048	339627	666882
3.00709e+06	3.79179e+06	2.12649e+06
703796	687400	3.77973e+06
644098	812343	2.51436e+06
3.17744	18230.2	46753.2
308643	446352	571591
912.587	4551.8	22490.4
34662.6	52740.1	49474
63647.4	159361	456161
1.9953e+06	3.95448e+06	3.91682e+06
1.00279e+06	2.09423e+06	7.18277e+06
2.48707e+06	4.81857e+06	6.07491e+06
2544.48	563.793	20963
6648.54	3148.7	36194
279982	17725.8	506348
308232	310771	1.04723e+06
1.6957e+06	4.20439e+06	3.71311e+06
266225	897640	1.42935e+06
3.47804e+06	7.02184e+06	7.49107e+06
2545.25	2903.35	33390.9
4326.74	7346.58	70508.7
967.458	1771.14	22615.8
19035.6	41735.7	81845
1.68498e+06	3.53122e+06	5.06574e+06
3.29164e+06	8.22938e+06	9.88654e+06
1178.82	320.264	21156.2
1784.88	3892.79	21692
3.26873e+06	7.27121e+06	6.85972e+06
1214.77	16916	63320.4
2245.84	9067.01	11220.1
18916.2	52455.4	78368.5
4920.38	25593.9	41490.2
849192	2.4935e+06	2.34394e+06
2.72142e+06	5.7507e+06	6.00348e+06
4711.27	18279.1	53680.3
19.052	12.6469	3022.67
983.776	234.212	23254.2
1.76773e+06	4.01592e+06	3.115e+06
1.67827e+06	2.41494e+06	4.23677e+06
9566.73	15803.5	84590.1
281.182	24344.5	57404.4
18054.9	63634.8	297583
24041.9	32670.8	80209.8
2987.07	27.9651	74429.6
297.189	7929.22	44226.6
2.11677e+06	2.497e+06	2.57982e+06
121606	99822.4	226457
349814	480222	342932
1.07709e+06	1.30944e+06	1.66206e+06
2.30502e+06	3.21108e+06	3.12716e+06
368.068	5905.26	5595.92
1.11558e+06	1.76203e+06	1.9544e+06
545943	931776	744811
294012	358466	1.02207e+06
59554.9	172323	917288
1.54379e+06	2.80143e+06	2.36339e+06
57675.1	115183	140209
982.219	4237.42	20298
2.69225e+06	4.47304e+06	5.54584e+06
1.91275e+06	3.12149e+06	2.02851e+06
68733.2	183022	230946
957129	2.23529e+06	2.56009e+06
84.2682	1556.3	5548.44
61732.6	91773.6	210690
197319	866251	1.64255e+06
13560.4	5761.01	92274.9
2.59977e+06	3.60977e+06	4.66488e+06
68.2814	16609.6	54159.5
752943	1.09186e+06	1.76197e+06
39.4753	3224.17	37773
14992.2	34541.2	79661.1
21731.3	210733	474362
160998	382664	2.12147e+06
49304.2	80734.8	420760
8559.68	42583.2	114934
1.09923e+06	1.91933e+06	3.61579e+06
168.439	953.706	16064.6
2.18127e+06	5.78315e+06	9.49592e+06
8502.04	18956.7	51041.6
231373	565957	2.94442e+06
3.90158e+06	7.025e+06	1.20178e+07
5910.18	23101.5	54764.9
4115.54	31648.1	54801.7
8622.49	22784.3	47551.3
4610.3	4466.06	38454.2
12.8478	6677.99	25760.8
44.5498	2844.45	52601.5
40513.8	41638.8	121785
8868.42	5810.16	34850.7
3.73487e+06	6.7122e+06	1.10344e+07
10186.7	12807.1	24728.5
36.5769	612.73	6507.04
6582.74	24290.2	54132.2
131159	147197	258217
2798.77	16420.9	54709.8
10243	3897.02	60385.5

## Sheet: Fits and Stats
Best-fit values
Slope	1.59	1.981
Y-intercept	0	0
X-intercept	0	0
1/slope	0.6289	0.5048
Std. Error
Slope	0.02355	0.05174
Y-intercept
95% Confidence Intervals
Slope	1,544 to 1,636	1,879 to 2,083
Y-intercept	0,000 to 0,000	0,000 to 0,000
X-intercept	-33593 to 32917	-59764 to 57656
Goodness of Fit
Sy.x	435899	957849
Is slope significantly non-zero?
F	4559	1466
DFn, DFd	1, 306	1, 306
P value	<0,0001	<0,0001
Deviation from zero?	Significant	Significant
Equation	Y = 1,590*X + 0,000	Y = 1,981*X + 0,000
Data
Number of X values	307	307
Maximum number of Y replicates	1	1
Total number of values	307	307
Number of missing values	0	0
