# Supplementary material for: Principles of RNA recruitment to viral ribonucleoprotein condensates in a segmented dsRNA virus
Source: eLife journal article supplement (doi:10.7554/elife.68670), 2023-01-26
Supplement: supp [file Fig5_source_data2.xls]

## Sheet: Relative amout
Seg 1	Seg 2	Seg 3	Seg 4	Seg 5	Seg 6	Seg 7	Seg 8	Seg 9	Seg 10	Seg 11
0.0402744	0.0294614	0.138196	0.0374193	0.0666198	0.158362	0.164305	0.102425	0.0920985	0.120502	0.0503362
0.0525939	0.0218117	0.203649	0.028034	0.0614947	0.121647	0.139258	0.100338	0.133484	0.0971964	0.0404939
0.0446534	0.0218514	0.224781	0.0324266	0.0599924	0.126961	0.130591	0.0944489	0.11969	0.0979181	0.0466869
0.0460075	0.0262974	0.12614	0.0485682	0.0346091	0.153627	0.209548	0.120721	0.0981536	0.0950626	0.0412652
0.0401544	0.0287563	0.152951	0.0349425	0.0613533	0.15302	0.164158	0.102728	0.105084	0.116715	0.0401388
0.0350262	0.027172	0.139886	0.0869846	0	0.205297	0.188397	0.129979	0.114895	0.0280168	0.0443469
0.0367632	0.0164911	0.091317	0.0521443	0.064131	0.164288	0.185213	0.109269	0.0889757	0.0984639	0.0929435
0.0439992	0.0318956	0.117882	0.040338	0.0545419	0.17157	0.173713	0.114117	0.099183	0.114362	0.0383983
0.053661	0.0315216	0.132431	0.0709751	0	0.159506	0.259049	0.153507	0.121575	0.0177752	0
0.0245227	0	0.142981	0.154106	0	0.141017	0.282753	0.160232	0.0862151	0	0.00817318
0.0358528	0.0211212	0.147093	0.0350166	0.0516658	0.133325	0.224861	0.0948428	0.0846893	0.134358	0.0371747
0.0601669	0.0352971	0.115242	0.0586041	0.0291532	0.181804	0.195995	0.12212	0.0942482	0.0328276	0.0745424

## Sheet: Relative amount vs total signal
Total RNA signal	Seg 1	Seg 2	Seg 3	Seg 4	Seg 5	Seg 6	Seg 7	Seg 8	Seg 9	Seg 10	Seg 11
14811.3	0.0402744	0.0294614	0.138196	0.0374193	0.0666198	0.158362	0.164305	0.102425	0.0920985	0.120502	0.0503362
43063	0.0525939	0.0218117	0.203649	0.028034	0.0614947	0.121647	0.139258	0.100338	0.133484	0.0971964	0.0404939
44503.6	0.0446534	0.0218514	0.224781	0.0324266	0.0599924	0.126961	0.130591	0.0944489	0.11969	0.0979181	0.0466869
3219.99	0.0460075	0.0262974	0.12614	0.0485682	0.0346091	0.153627	0.209548	0.120721	0.0981536	0.0950626	0.0412652
16885	0.0401544	0.0287563	0.152951	0.0349425	0.0613533	0.15302	0.164158	0.102728	0.105084	0.116715	0.0401388
1354.58	0.0350262	0.027172	0.139886	0.0869846	0	0.205297	0.188397	0.129979	0.114895	0.0280168	0.0443469
2417.2	0.0367632	0.0164911	0.091317	0.0521443	0.064131	0.164288	0.185213	0.109269	0.0889757	0.0984639	0.0929435
7742.45	0.0439992	0.0318956	0.117882	0.040338	0.0545419	0.17157	0.173713	0.114117	0.099183	0.114362	0.0383983
1252.73	0.053661	0.0315216	0.132431	0.0709751	0	0.159506	0.259049	0.153507	0.121575	0.0177752	0
427.543	0.0245227	0	0.142981	0.154106	0	0.141017	0.282753	0.160232	0.0862151	0	0.00817318
12281.5	0.0358528	0.0211212	0.147093	0.0350166	0.0516658	0.133325	0.224861	0.0948428	0.0846893	0.134358	0.0371747
1188.53	0.0601669	0.0352971	0.115242	0.0586041	0.0291532	0.181804	0.195995	0.12212	0.0942482	0.0328276	0.0745424
