# Supplementary material for: Principles of RNA recruitment to viral ribonucleoprotein condensates in a segmented dsRNA virus
Source: eLife journal article supplement (doi:10.7554/elife.68670), 2023-01-26
Supplement: supp [file Figure 5 source data 3.xlsx]

## Sheet: Sheet1
Cell	Viroplasm	Seg 1	Seg 2	Seg 3	Seg 4	Seg 5	Seg 6	Seg 7	Seg 8	Seg 9	Seg 10	Seg 11
1	1	5.52921	3.08884	4.65019	2.6617	3.19193	1.48502	1.78369	1.599	2.16452	3.35206	1.28297
	2	6.20614	2.87068	4.52338	2.72111	2.69526	1.91062	2.04047	1.72401	2.28426	2.4164	1.45276
	3	5.21569	2.98014	4.07189	2.40427	2.7391	1.49736	3.38358	1.75767	2.34266	3.69065	1.6821
	4	3.48654	1.80884	2.64724	1.83072	1.75471	1.37574	4.15367	1.22697	1.91388	2.56135	1.53729
	5	4.53625	2.49141	3.18073	2.54872	2.54213	1.52973	3.72064	2.0715	1.99005	4.28518	1.50958
	6	4.12844	3.10871	4.06528	2.17014	2.30277	1.72288	1.0087	1.92735	1.92593	1.76804	1.42845
2	7	6.39462	4.47151	4.06511	2.85962	0.874335	2.01897	2.02001	1.89295	2.22746	2.75899	1.8933
	8	5.55098	3.53235	3.50599	2.44789	0.870264	1.50339	1.50713	1.57318	1.84394	2.48689	1.66862
	9	5.22679	3.6874	4.42829	2.95042	0.980142	2.09746	1.83823	1.91023	2.23675	3.14866	2.26145
	10	4.90794	2.81077	4.07811	2.76927	1.06999	1.70958	3.41043	1.45066	2.55102	4.34191	2.09383
	11	5.12845	3.18122	3.92778	3.24734	0.89294	2.25401	0.940564	1.44184	2.10863	2.4855	2.04728
	12	3.76972	2.28661	3.23216	2.7659	0.981857	2.37479	1.926	2.40449	2.26887	2.47268	2.06277
	13	5.88633	2.75559	4.83547	3.13862	1.11206	2.10286	5.02012	2.08001	2.87671	3.88698	1.86927
3	14	7.16507	5.28798	5.0689	3.56766	4.1041	2.11136	4.39466	1.76473	2.85704	3.72864	2.32794
	15	4.93853	2.85163	3.87376	2.41183	2.70262	1.86859	3.49644	1.654	2.18492	3.07548	1.6379
	16	3.02327	1.63686	1.65683	1.24678	1.37359	1.1065	1.3363	1.13517	1.36252	1.68728	1.12985
	17	4.47598	2.03389	2.28083	1.59709	1.98723	1.11049	1.05029	1.13648	1.34483	1.99657	1.2017
	18	5.31576	0.679819	0.775366	2.54671	0.803987	0.575973	0.420095	0.605809	0.746733	0.412157	0.828139
	19	2.96772	1.49751	1.05368	1.53722	1.50477	1.51268	1.7163	1.34287	1.3914	2.11493	1.78823
	20	2.44883	1.47242	1.14955	0.898969	0.966166	0.955131	1.80809	0.809598	1.34003	2.04417	1.22877
	21	7.12922	3.81563	5.2187	2.92082	3.61214	3.16879	3.36637	2.70352	2.98601	2.95554	2.32055
