# Supplementary material for: Principles of RNA recruitment to viral ribonucleoprotein condensates in a segmented dsRNA virus
Source: eLife. 2023 Jan 26;12:e68670. doi: 10.7554/eLife.68670 (PMC9925054; doi:10.7554/eLife.68670)
Supplement: Supplementary file 1. [file elife-68670-supp1.xlsx]

## Sheet: GenBankID
Segment	GenBank ID
1	KF729687.1
2	KF729639.1
3	KF729647.1
4	KF729690.1
5	KF729657.1
6	KF729692.1
7	KF729693.1
8	KF729694.1
9	KF729695
10	KF729696.1
11	KF729697.1

## Sheet: EGFP FISH probes
FISH probe #	EGFP
1	cggtgaacagctcctcgc
2	ctcgaccaggatgggcac
3	gtttacgtcgccgtccag
4	acacgctgaacttgtggc
5	gccggtggtgcagatgaa
6	agggtggtcacgagggtg
7	cactgcacgccgtaggtc
8	tcggggtagcggctgaag
9	agtcgtgctgcttcatgt
10	ggcatggcggacttgaag
11	tcctggacgtagccttcg
12	ccgtcgtccttgaagaag
13	gcgcgggtcttgtagttg
14	tgtcgccctcgaacttca
15	cagctcgatgcggttcac
16	cttgaagtcgatgccctt
17	caggatgttgccgtcctc
18	cgttgtggctgttgtagt
19	gcttgtcggccatgatat
20	gtcctcgatgttgtggcg
21	gtagtggtcggcgagctg
22	gatgggggtgttctgctg
23	ttgtcgggcagcagcacg
24	gactgggtgctcaggtag
25	gttggggtctttgctcag
26	catgtgatcgcgcttctc
27	ggtcacgaactccagcag
28	tccatgccgagagtgatc

## Sheet: Stellaris FISH probes
Target	Combined	Segment 3 Quasar 670	Segment 4 Quasar 570	GAPDH C. Aethiops
Fluorophore	Quasar 570	Quasar 670	Quasar 570	Quasar 670
Sequences
1	tcaatgatagtccattctttga	tcaatgatagtccattctttga	ctgtctataaatgagtgaagcc	aagcagagagcgcaggggg
2	caacattttctgtttcctgaat	caacattttctgtttcctgaat	tcatctgaaagttctactgtgt	ggctgactctcgaaccgga
3	tgtttcgcgtaaattagcattt	tgtttcgcgtaaattagcattt	attaacggtaacgtcttgagtc	gctggcgatgcaagagaag
4	gctttaactttagcattcattc	gctttaactttagcattcattc	ccaattaactggagcgtaattt	ccatggtgtctcagggatg
5	acgtcttttctcaagtgatatt	acgtcttttctcaagtgatatt	ttcaactgtagttgagtcattc	cgttgactccgaccttcac
6	atgtaatgttccacattttctt	atgtaatgttccacattttctt	atccaataacttacaggtggat	gcgcccaatacgaccaaat
7	tgcattctattgttttgatctt	tgcattctattgttttgatctt	ttaatattgtcgctaaccatct	ttaaaagcagccctggtga
8	tcatattgtatctctttttggt	tcatattgtatctctttttggt	atgtatatgttcgctcaacttg	caatatccactttaccaga
9	tattttcaactgccatatcttt	tattttcaactgccatatcttt	tactgttacttgaacttgttgc	aaaggggtcattgatggca
10	gtcttatatatctagctgttga	gtcttatatatctagctgttga	tacttagatccacaaatttcca	aaccatgtagttgaggtca
11	tctatcccttaatctatacatt	tctatcccttaatctatacatt	tgtaaattttacctccatgttt	tgccatgggtggaatcata
12	ttgcttatatacttttgtggtt	ttgcttatatacttttgtggtt	aatatgctgtcatgtttacagt	cttcacggtgccatggaac
13	tgcattttcatagtcatcttta	tgcattttcatagtcatcttta	tatgtatttagtgcattttgct	acaagcttcccgttctcag
14	gtccttatctcattattagtat	gtccttatctcattattagtat	tattttgtattggtggtaatcc	tgatggggcttccattgat
15	ccgttatatccaacatacatta	ccgttatatccaacatacatta	tccttgatactatcgaaactgg	gatctcgttcctggaagat
16	tctctcttgtttaagctttatt	tctctcttgtttaagctttatt	tactatgtcttgattaggttgt	atcgccccacttgattttg
17	ttagaatcccatatatccatta	ttagaatcccatatatccatta	atattgcatctctttccataat	gactccacgacgtactcag
18	aatatctttaaaccccactttt	aatatctttaaaccccactttt	ccctgatttaatgattgagtta	ttctccgtggtggtgaaga
19	ttaatattgtcgctaaccatct	ttaatattgtcgctaaccatct	gtttaaatgacacttctgacca	gcagagatgatgacccttt
20	tgtaaattttacctccatgttt	tgtaaattttacctccatgttt	ccatttactgaacacgtagtat	aacataggggcgtcagcag
21	tatgtatttagtgcattttgct	tatgtatttagtgcattttgct	aaatcagtcggtaatgatccac	catggttcacacccatgac
22	atattgcatctctttccataat	atattgcatctctttccataat	cgtacatttaccatgtttctaa	gaggctgttgtcatacttc
23	taaattcatctcttagttctcc	taaattcatctcttagttctcc	cattaccgaatttaaatcggct	aggaggcgttgctgacgat
24	tttcgtattattggattatcct	tttcgtattattggattatcct	ggaagcgcaaaactatagtcac	tgctaagcagttggtggtg
25	ttaatattgtcgctaaccatct	ttaatattgtcgctaaccatct	ttgataaagttacacctgctga	ttgtcatggatgaccttgg
26	tgtaaattttacctccatgttt	tgtaaattttacctccatgttt	cggttcttctactgataatcta	atgagtccttccacgatac
27	tatgtatttagtgcattttgct	tatgtatttagtgcattttgct	attcttgtgaattattcggtct	agtgatggcgtggactgtg
28	atattgcatctctttccataat	atattgcatctctttccataat	atttgacggtacgagtgatatt	atccacagtcttctgggtg
29	atgtaatgttagatacttccgt	atgtaatgttagatacttccgt	ttgtcgtacagtgactgaattt	gtagaggcagggatgatgt
30	tttcgtattattggattatcct	tttcgtattattggattatcct	taaattcatctcttagttctcc	cgttcagctcagggatgac
31	attttgtctctagcatctttaa	attttgtctctagcatctttaa	gacatagcgatttgttgtgata	cagtggggacacggaaggc
32	gaactcatttccattcatagta	gaactcatttccattcatagta	tgagaacatgtctaacggtagt	gtccaccactgacacgttg
33	ttctttgtcttctattttgcaa	ttctttgtcttctattttgcaa	tgcgtcaattgtactcttaatc	ttttccagacggcaggtca
34	ctctatttcaacgttatttggt	ctctatttcaacgttatttggt	tcagacaatgaatcagtgagcg	tgtcatcgtatttggcagg
35	tcaagaagattagaattgtggt	tcaagaagattagaattgtggt	ccgatgcatttctagaaattga	ctgcttcaccaccttcttg
36	catagttttgcgcatttattat	catagttttgcgcatttattat	ctgatgcagttgaactaactga	cacctggtgctcagtgtag
37	ttttgctgtcaacatacatttt	ttttgctgtcaacatacatttt	atgtaatgttagatacttccgt	gtgtcgctgttgaagtcag
38	gtcttacagaaattacttttga	gtcttacagaaattacttttga	cttattgttgatgtctgtgtag	gcgtcgaaggtggaagagt
39	tttacccaacagattgttttta	tttacccaacagattgttttta	aattttagtcttgagtactgct	agtggtcgttgagggcaat
40	attgttcatatctagatttcca	attgttcatatctagatttcca	ccggcaatgtatttgtatttaa	ccaggaaatgagcttgaca
41	catttaccttttttgctttttg	catttaccttttttgctttttg	gtataaacttttctgaagcctc	ttgctgtagccaaattcgt
42	cctcattaatcctttaaacatt	cctcattaatcctttaaacatt	ctagcacttcatcatctttaat	ttactccttggaggccatg
43	tacactcgatgtatagttgagg	tacactcgatgtatagttgagg	cactaagtcagcgaatttttgt	tcttcctcttgtgctctcg
44	tgtgcaatgtgctgttcattag	tgtgcaatgtgctgttcattag	attattgccgatataactggtg	gactgagtgtggcagggac
45	tataaggaaaatacgccatccc	tataaggaaaatacgccatccc	agaagatttagtgcttgttgtc	ctgtgaggggagattcagt
46	cgtgaacaaaactgttaggaca	cgtgaacaaaactgttaggaca	aaattcacgtaatactcgcgga	ctcttcaaggggtctacat
47	ttcattgttggaatagatgctt	ttcattgttggaatagatgctt	tttcgtattattggattatcct	tggtacacgacaaggtggg
48	tatgaacatttggacgtcttca	tatgaacatttggacgtcttca	agcgacattgcattatcaaact	ctgagcacaggggatttta

## Sheet: UDEx Barcode Sequences
Target RNA	Barcode Sequence	Complementary probe sequence
Seg 1	TTATACATCTACGG	CCGTAGATGTAT
Seg 2	TTTCTTCATTAGCG	CGCTAATGAAGA
Seg 3	TTTCAATGTATGGC	GCCATACATTGA
Seg 4	TTATAATGGATGGG	CCCATCCATTAT
Seg 5	TTTAGTTAGAGCCC	GGGCTCTAACTA
Seg 6	TTTTGATGATAGCC	GGCTATCATCAA
Seg 7	TTATAAAGTGTCCA	TGGACACTTTAT
Seg 8	TTATATGATCTCCG	CGGAGATCATAT
Seg 9	TTTATTAAGCTCGC	GCGAGCTTAATA
Seg 10	TTATAGAGAAGTCG	CGACTTCTCTAT
Seg 11	TTTTAAAACAGCCT	AGGCTGTTTTAA
EGFP	TTTAACATTCCTAAC	GTTAGGAATGTTA

## Sheet: UDEx FISH probes
FISH probe #	Segment 1	Segment 2	Segment 3	Segment 4	Segment 5	Segment 6	Segment 7	Segment 8	Segment 9	Segment 10	Segment 11
1	ttcataatccaactcattcact	tattatttatattcgcctcacg	ccacactatgtcttaaagctaa	attaacggtaacgtcttgagtc	attaacggtaacgtcttgagtc	tttgacaaggagtacaggacat	ctagccaaacggaaattctcgc	gggataacaaaagcaagctagc	tagactccatcttgagcatcaa	gctctctcggaacagaact	gacatcactgtagcgctt
2	ctgttgggaaaagttcagatgt	cttcacttcatcagcaatttta	tgagtatatatttgagtgtccg	ccaattaactggagcgtaattt	ccaattaactggagcgtaattt	attttgtctctagcatctttaa	ataccatacattaaaaggagct	atgaatctatacgtatcgctct	aataatcgaactagccatctgc	ttttccatctttccgcacg	ggaagactcgtcacgtca
3	tggatccatcaatgaatcagta	attgtttagattcttctttcgt	atatttgcaatgtcttaacgct	ttcaactgtagttgagtcattc	ttcaactgtagttgagtcattc	ttacattggagtataatgtgcc	tcaagaagattagaattgtggt	ttttgctgtcaacatacatttt	aacgactgcggcttcaaaagaa	atagttgaggtcggtaagc	gtactgttcactcctacc
4	aattgaagaatttgcccatgtt	tcttttggttcaaatgttggta	tatatttgtcttagttacccaa	atccaataacttacaggtggat	atccaataacttacaggtggat	gaactcatttccattcatagta	attatatagtccatcattctcg	aacttatcctgatcttttttgt	attgaatgcccataagttcaag	gagtgattacactcgatgt	tgcttctgcatctggtga
5	taccagaattgacattggtgat	tttgatatcctccaattttttc	gtagctgcattttgacatttaa	atgtatatgttcgctcaacttg	atgtatatgttcgctcaacttg	atttctaatcggtagattacca	ccaagatcactactataagcag	gtgcaatgccataaattattga	gctcttaactctagtataaact	tgcaatgtgctgttcatta	ctggagactttgacagca
6	attgctcgtacatatttgtttg	attctaaatagcttagtctgct	atttgtctctgaacacacgatt	tactgttacttgaacttgttgc	tactgttacttgaacttgttgc	gagttgttccaagtaatccaaa	catagttttgcgcatttattat	ataacgttttttgaactgtggc	ctgaatcatccattacgtaatc	tggatcctcgagtatcgtg	gcagaatcagatggtcca
7	cagttttcaattgatctagtgc	tctataaattggtagctgtctc	aaacatagattcattccttggt	tacttagatccacaaatttcca	tacttagatccacaaatttcca	cgacgtagttagcatctaaatt	tatccattgaacctgtaattgg	tcataattcattcctctcgaat	tttacccaacagattgttttta	aaggaaaatacgccatccc	agctggtgagtggatcgt
8	gatacatttcgtcatctacatc	ttctctaacatcataatctcca	actgctttattgatggatgatc	aatatgctgtcatgtttacagt	aatatgctgtcatgtttacagt	aataatcaattgtattgcgggc	actttgtgtagagtctgcatac	ataccgccactttattaaacat	ttcagtgcctgatcaatagttg	actgttaggacagatgcta	gcatttgtcttaactgca
9	ttcatctcttattagcattgtg	atatagcatcacagatacttgc	gatgtcaaattgcgatagtctc	tattttgtattggtggtaatcc	tattttgtattggtggtaatcc	gtccatacatacattatctaca	tacaaacaaagggttgatgtca	taattgaattcaacgcttcaca	ttcttgctgctgaaccaaattt	gatgctttgtgcaacgtga	catagacacgccagcgtc
10	cctgtaacaaatggtcatcatg	gtaattgacaacgtttctgtca	agagtattgttttacatcgtgt	tccttgatactatcgaaactgg	tccttgatactatcgaaactgg	atttctttgtgattctctaacc	tatttcgtttgatgcctcaaca	actcgcaacatcagattgagta	tctagtatcagccatccaattt	gtgcaattttcattgttgg	ccgtgattgtgttgatga
11	cattgatagtaaaccagccaat	gcgtaatctattggatgcaata	ttaagtttggttacgtcacttg	tactatgtcttgattaggttgt	tactatgtcttgattaggttgt	taagtgaatctgattgtggtgc	taaggtatctttccattcggta	gtcttacagaaattacttttga	acatcttcatctagtctagctg	gaacatttggacgtcttca	cccaacattgcttgatgg
12	taatggtatcggtttatcgaca	gtatatagttaacgtcattcct	tattcaaattgttagcggtctg	ccctgatttaatgattgagtta	ccctgatttaatgattgagtta	ttcttttaaatttaatgcctga	ccatccttttgtcaagaacaat	tcttctcagtaccaaattctct	gatgatagcatcattctaagtt	ctgttctttataacctgcc	gaaatccacttgatcgca
13	aatattattctagtccgtcttc	attgtcatgcaaattcagtctg	ttacctgtggataagtatttgt	gtttaaatgacacttctgacca	gtttaaatgacacttctgacca	agttctctatgtattctgatga	tctttaaggtacactgatcctg	ttttgaatggaaaagcacgtcc	ctctcattttttgatcaattcc	ccatttgcttttctatctc	gaatccaggttcgcgttc
14	tacagcatgttgtgctatgaaa	atcttgccagaatatagtttga	agtcattttaacgcaacacact	ccatttactgaacacgtagtat	ccatttactgaacacgtagtat	ttctttgtcttctattttgcaa	actgaaaaggccgctatatcag	ctattagtactgatctcagcaa	gcttcacattgaaacatgcatt	catctctttgactaccctg	ccttcttcgaactggttg
15	acgtctgtatatagtaccatag	acattttttgaatttgcgcttc	gcagatatcggtagttctaaat	aaatcagtcggtaatgatccac	aaatcagtcggtaatgatccac	agggaaaatgtttggtttatga	tataatcgcagtataactgtgg	tttcaatttcttttgagtgacc	tattgatgatgatttacctgga	tcatttctagctgacgtct	ggtcgcttttggatttct
16	taattatccctttcctaaatgg	ctgtattgttaatgcttctagt	tgatctaatttctgtagttggg	cgtacatttaccatgtttctaa	cgtacatttaccatgtttctaa	gtgatctgttcaacgtgaatga	acatatctagttcttgtgtaga	gcattttgaaaaactacttccc	cgttcaatcttatctctcatta	gctcaatttcacgtgtagt	gggtagtgtttcctactt
17	catcattagtcatattggctag	cttaacattgctgcaatcagag	aacacgccttttggtataaatc	cattaccgaatttaaatcggct	cattaccgaatttaaatcggct	gtacccatcaagttatcatgag	gttcaatataagatcggccaat	atgtcagtttccacattgtaaa	caaacgaatcatccacttcgac	cgttttagcaattccacct	tcgtcgagtatgtagtca
18	cgtctgtttatataagttcagc	tgtagtcacgaaatcaagcgac	acggttgttgtataaacacgtt	ggaagcgcaaaactatagtcac	ggaagcgcaaaactatagtcac	ttattgcacatgagtagtcgaa	ttatgtccattggattgcacag	aaattggcattagtctatgctc	attgtgtcaacttccatttttt	actgctcgtatcatcaatt	gtgcgaaatacttcctct
19	attaccatctggtatttgaacg	aatgattcccttatgaacatgt	cacatactcattccttaatgtt	ttgataaagttacacctgctga	ttgataaagttacacctgctga	caatatgctcaaattgttgcgt	atcagtctgctgataataatat	ttcactgttattttatattcga	attgttcatatctagatttcca	cgtcatatctatttcgtct	gcattgcgacttgtttca
20	attatcttcgtcgcgaatgaat	cgtttctataatgcattcgttg	aaccaatttaaccacatcttct	attcttgtgaattattcggtct	attcttgtgaattattcggtct	ttattgtagctgtagtcaacac	cccgttgatatccatttatttg	gtgattctgaaattggtttatc	tttcagcgattcaaatcgtttt	gttcttttggttaatttcc	cctctcaggttagaccta
21	tgtattgaactgcaatactgcg	tttgttgttctgctatctgaaa	ccttacagttattaacgcattt	atttgacggtacgagtgatatt	atttgacggtacgagtgatatt	ctaaatctttctgcatctggta	taatggacacactttaaccgtg	caattcagcaatgagttctctt	acttgtatatttttcattcacc	attcttctagcgttctcac	aaacgggagtggggagct
22	cgtcgtttgatacatcttgaac	agccaattcgctacttgaaaat	attcgtttcaaaatcagttggc	ttgtcgtacagtgactgaattt	ttgtcgtacagtgactgaattt	tcagctgaagtaatcactcttg	catccaataccaagtgtttgtg	tactgcaaatttgttgtattgc	catttaccttttttgctttttg	ggattttttccattttccc
23	cctcgaagtctattcacaatat	cgtgatagttgcattaaagctt	aaccaaacatacctagacaacc	gacatagcgatttgttgtgata	taaattcatctcttagttctcc	aatcactggattgaagtaccat	caaacgtgtctggattagttat	tacaactctgtagtgaccttta	ctgttgtgatataacgttttgg	tgcagtcacttcttttggt
24	aacacgcgttcagaaggaaaga	ataatcaacaggcattgttgga	ttatttccagttggttttgaag	tgagaacatgtctaacggtagt	gacatagcgatttgttgtgata	ctctatttcaacgttatttggt	taacttctccattgtcgcaact	gcatgattcgcaactgatgaat	ttttgtaaatcagcaatctggc	agctcaacctcttacatcg
25	ataaagtcctccgagtcaaata	aattgaccaagcctatttgata	tgatatgctcatatgatttgca	tgcgtcaattgtactcttaatc	tgagaacatgtctaacggtagt	tggtaagtatttattatctgcc	acaccatctacaacatctgtaa	attgctcttgaaagtagcgtaa	ttattttgtagatcaacttcca	ttccgaagacagtcgacgg
26	aacgctctttgtatgtatactt	tgttgcatattcatcgtaacac	tccgaaaatcgtatttgatgcg	tcagacaatgaatcagtgagcg	tgcgtcaattgtactcttaatc	ctagctatgatcgttccaaatc	ccgttgtgacgtttaatttgtg	taaactctatcacattcccatt	cgactgaagacacaagtgaact	tactgtgaagaactccgcc
27	cctctagacactatattattct	ttgcatttccaataagcataca	aatgcattatacacatgtccag	taactgatctaaccgatgcatt	tcagacaatgaatcagtgagcg	gtggtctcatcaactgaaatga	aactttttacagttgcgtatgg	tgccatattattctttgatcaa	caattccattgatttcaggtac	tcagtcatcaggtccgatg
28	attgtatcggtaaatgtgcttc	cactgcatcattaattctttca	tccatcgcttaagatcaaatga	atgtaatgttagatacttccgt	taactgatctaaccgatgcatt	atttggaaataacgccgctacc	gatgtctaaaacatttgcgccg	attgaggatgtaaacgcatacc	agttgttgttcaatatctgtct	atgactgactgtggcttct
29	ttgtctggtaaagttggcataa	aaatcttcaactattgccttca	aatactagccttgtttgttgaa	cttattgttgatgtctgtgtag	cttattgttgatgtctgtgtag	tgttgcgtgatgttcaaatggc	tgtggtgtagttgttggatcag	atatttcaagagtgttgccttg	ttggattgattacatcaatgga	taaggcttaagccacacgc
30	ctggatcctatacactgaatta	atccatgttcatcagtatcaaa	tgcatgcgtaaatcaactctat	aattttagtcttgagtactgct	aattttagtcttgagtactgct	agattcaattctaagcgtgagt	aatttattcgcatcattctctc	catcttttggaacagtagtttc	tctgatcagtgattcaaaatca	ccggattggttaaacggga
31	attagtcgagatatagctgact	tacgcaataataacaccttgcg	ttaaatcgtcttgcaactttgc	ccggcaatgtatttgtatttaa	ccggcaatgtatttgtatttaa	gtcggcaagtactgattcacaa	tgtaaaacacttgccaccattt	tcccttaaacggattactttct	atattctgtcatagtcgagtat	cattaacgtccggtgctga
32	tgtataactcttcgattgacgg	ctcatcaattcttctaggttta	tcatcggcatatgttatactat	gtataaacttttctgaagcctc	gtataaacttttctgaagcctc	ctaacagatgtcacatttgcta	ttatctgattgacgtaatccac	tcatccatctttctatcagttg	cctcattaatcctttaaacatt	gtcacattaagaccgttcc
33	taaattttcgatccgacgtacg	tgtaacaaatggaagagctcca	gcggtactttaacatcatattc	ctagcacttcatcatctttaat	ctagcacttcatcatctttaat	aaaactggtccaactggtatcg	atctagatcttttggacattgt	atcgatagcgaattaaattcct	tcatacgtatattcatagttgc
34	acgactctaatatcctgtattt	ttcgctatcaacgatatgactg	aaaattgctactacatccggta	cactaagtcagcgaatttttgt	cactaagtcagcgaatttttgt	aaatcagtccaattcatacctg	atagtagaacgccgacgaatta	ttctattcttactttgccatac	ggtcatgtgaagatggtaattt
35	ctgatcagtttttctagatctg	caaggtatcaactttccgtaat	atatacgtgtaactcgtggtta	attattgccgatataactggtg	attattgccgatataactggtg	tctctagatggtgaatagttag	tctaatctaacatgcacctaca		tagcttttaactattgtgctca
36	agctggtatttttcctttaaac	atcatagttggcaactaggtaa	aatatgttgataacacgccact	agaagatttagtgcttgttgtc	agaagatttagtgcttgttgtc	actgtaaatacacgctgcaagt			atagccatttaggtttttgaca
37	ttctagcttagcgtataaatgc	tgcaagcagatctgagtaaaca	tgctctttatagaatgcattgt	aaattcacgtaatactcgcgga	aaattcacgtaatactcgcgga	ttgacaagcatgcttctaatgg
38	gaataaacttatccatgagcca	gcgcatattatcaaatgcaact	ctactctcttgttactgaaact	agcgacattgcattatcaaact	agcgacattgcattatcaaact

## Sheet: pPB shRNA-EGFP-T2A-Puro-U6
>VB180326-1135ekj pPB[shRNA]-EGFP:T2A:Puro-U6>{NSP2_RF_SA11_716nt}
TTAACCCTAGAAAGATAGTCTGCGTAAAATTGACGCATGCATTCTTGAAATATTGCTCTC
TCTTTCTAAATAGCGCGAATCCGTCGCTGTGCATTTAGGACATCTCAGTCGCCGCTTGGA
GCTCCCGTGAGGCGTGCTTGTCAATGCGGTAAGTGTCACTGATTTTGAACTATAACGACC
GCGTGAGTCAAAATGACGCATGATTATCTTTTACGTGACTTTTAAGATTTAACTCATACG
ATAATTATATTGTTATTTCATGTTCTACTTACGTGATAACTTATTATATATATATTTTCT
TGTTATAGATATCGAGGGCCTATTTCCCATGATTCCTTCATATTTGCATATACGATACAA
GGCTGTTAGAGAGATAATTGGAATTAATTTGACTGTAAACACAAAGATATTAGTACAAAA
TACGTGACGTAGAAAGTAATAATTTCTTGGGTAGTTTGCAGTTTTAAAATTATGTTTTAA
AATGGACTATCATATGCTTACCGTAACTTGAAAGTATTTCGATTTCTTGGCTTTATATAT
CTTGTGGAAAGGACGAAACACCGGGGTCACTACAGAGTTGTAATTGGATCCAATTACAAC
TCTGTAGTGACCTTTTTGAATTCGATATCATCAACTTTGTATAGAAAAGTTGGGGTTGCG
CCTTTTCCAAGGCAGCCCTGGGTTTGCGCAGGGACGCGGCTGCTCTGGGCGTGGTTCCGG
GAAACGCAGCGGCGCCGACCCTGGGTCTCGCACATTCTTCACGTCCGTTCGCAGCGTCAC
CCGGATCTTCGCCGCTACCCTTGTGGGCCCCCCGGCGACGCTTCCTGCTCCGCCCCTAAG
TCGGGAAGGTTCCTTGCGGTTCGCGGCGTGCCGGACGTGACAAACGGAAGCCGCACGTCT
CACTAGTACCCTCGCAGACGGACAGCGCCAGGGAGCAATGGCAGCGCGCCGACCGCGATG
GGCTGTGGCCAATAGCGGCTGCTCAGCAGGGCGCGCCGAGAGCAGCGGCCGGGAAGGGGC
GGTGCGGGAGGCGGGGTGTGGGGCGGTAGTGTGGGCCCTGTTCCTGCCCGCGCGGTGTTC
CGCATTCTGCAAGCCTCCGGAGCGCACGTCGGCAGTCGGCTCCCTCGTTGACCGAATCAC
CGACCTCTCTCCCCAGGCAAGTTTGTACAAAAAAGCAGGCTGCCACCATGGTGAGCAAGG
GCGAGGAGCTGTTCACCGGGGTGGTGCCCATCCTGGTCGAGCTGGACGGCGACGTAAACG
GCCACAAGTTCAGCGTGTCCGGCGAGGGCGAGGGCGATGCCACCTACGGCAAGCTGACCC
TGAAGTTCATCTGCACCACCGGCAAGCTGCCCGTGCCCTGGCCCACCCTCGTGACCACCC
TGACCTACGGCGTGCAGTGCTTCAGCCGCTACCCCGACCACATGAAGCAGCACGACTTCT
TCAAGTCCGCCATGCCCGAAGGCTACGTCCAGGAGCGCACCATCTTCTTCAAGGACGACG
GCAACTACAAGACCCGCGCCGAGGTGAAGTTCGAGGGCGACACCCTGGTGAACCGCATCG
AGCTGAAGGGCATCGACTTCAAGGAGGACGGCAACATCCTGGGGCACAAGCTGGAGTACA
ACTACAACAGCCACAACGTCTATATCATGGCCGACAAGCAGAAGAACGGCATCAAGGTGA
ACTTCAAGATCCGCCACAACATCGAGGACGGCAGCGTGCAGCTCGCCGACCACTACCAGC
AGAACACCCCCATCGGCGACGGCCCCGTGCTGCTGCCCGACAACCACTACCTGAGCACCC
AGTCCGCCCTGAGCAAAGACCCCAACGAGAAGCGCGATCACATGGTCCTGCTGGAGTTCG
TGACCGCCGCCGGGATCACTCTCGGCATGGACGAGCTGTACAAGGGCTCCGGAGAGGGCA
GGGGAAGTCTTCTAACATGCGGGGACGTGGAGGAAAATCCCGGCCCCATGACCGAGTACA
AGCCCACGGTGCGCCTCGCCACCCGCGACGACGTCCCCAGGGCCGTACGCACCCTCGCCG
CCGCGTTCGCCGACTACCCCGCCACGCGCCACACCGTCGATCCGGACCGCCACATCGAGC
GGGTCACCGAGCTGCAAGAACTCTTCCTCACGCGCGTCGGGCTCGACATCGGCAAGGTGT
GGGTCGCGGACGACGGCGCCGCGGTGGCGGTCTGGACCACGCCGGAGAGCGTCGAAGCGG
GGGCGGTGTTCGCCGAGATCGGCCCGCGCATGGCCGAGTTGAGCGGTTCCCGGCTGGCCG
CGCAGCAACAGATGGAAGGCCTCCTGGCGCCGCACCGGCCCAAGGAGCCCGCGTGGTTCC
TGGCCACCGTCGGCGTCTCGCCCGACCACCAGGGCAAGGGTCTGGGCAGCGCCGTCGTGC
TCCCCGGAGTGGAGGCGGCCGAGCGCGCCGGGGTGCCCGCCTTCCTGGAGACCTCCGCGC
CCCGCAACCTCCCCTTCTACGAGCGGCTCGGCTTCACCGTCACCGCCGACGTCGAGGTGC
CCGAAGGACCGCGCACCTGGTGCATGACCCGCAAGCCCGGTGCCTGAACCCAGCTTTCTT
GTACAAAGTGGTGATCCTCAGGTGCAGGCTGCCTATCAGAAGGTGGTGGCTGGTGTGGCC
AATGCCCTGGCTCACAAATACCACTGAGATCTTTTTCCCTCTGCCAAAAATTATGGGGAC
ATCATGAAGCCCCTTGAGCATCTGACTTCTGGCTAATAAAGGAAATTTATTTTCATTGCA
ATAGTGTGTTGGAATTTTTTGTGTCTCTCACTCGGAAGGACATATGGGAGGGCAAATCAT
TTAAAACATCAGAATGAGTATTTGGTTTAGAGTTTGGCAACATATGCCCATATGCTGGCT
GCCATGAACAAAGGTTGGCTATAAAGAGGTCATCAGTATATGAAACAGCCCCCTGCTGTC
CATTCCTTATTCCATAGAAAAGCCTTGACTTGAGGTTAGATTTTTTTTATATTTTGTTTT
GTGTTATTTTTTTCTTTAACATCCCTAAAATTTTCCTTACATGTTTTACTAGCCAGATTT
TTCCTCCTCTCCTGACTACTCCCAGTCATAGCTGTCCCTCTTCTCTTATGGAGATCCCTC
GACCTGCAGCCCAAGCTTGGATCCCTCGAGTTAATTAACGAGAGCATAATATTGATATGT
GCCAAAGTTGTTTCTGACTGACTAATAAGTATAATTTGTTTCTATTATGTATAGGTTAAG
CTAATTACTTATTTTATAATACAACATGACTGTTTTTAAAGTACAAAATAAGTTTATTTT
TGTAAAAGAGAGAATGTTTAAAAGTTTTGTTACTTTATAGAAGAAATTTTGAGTTTTTGT
TTTTTTTTAATAAATAAATAAACATAAATAAATTGTTTGTTGAATTTATTATTAGTATGT
AAGTGTAAATATAATAAAACTTAATATCTATTCAAATTAATAAATAAACCTCGATATACA
GACCGATAAAACACATGCGTCAATTTTACGCATGATTATCTTTAACGTACGTCACAATAT
GATTATCTTTCTAGGGTTAAATAATAGTTTCTAATTTTTTTATTATTCAGCCTGCTGTCG
TGAATACCGAGCTCCAATTCGCCCTATAGTGAGTCGTATTACAATTCACTGGCCGTCGTT
TTACAACGTCGTGACTGGGAAAACCCTGGCGTTACCCAACTTAATCGCCTTGCAGCACAT
CCCCCTTTCGCCAGCTGGCGTAATAGCGAAGAGGCCCGCACCGATCGCCCTTCCCAACAG
TTGCGCAGCCTGAATGGCGAATGGGACGCGCCCTGTAGCGGCGCATTAAGCGCGGCGGGT
GTGGTGGTTACGCGCAGCGTGACCGCTACACTTGCCAGCGCCCTAGCGCCCGCTCCTTTC
GCTTTCTTCCCTTCCTTTCTCGCCACGTTCGCCGGCTTTCCCCGTCAAGCTCTAAATCGG
GGGCTCCCTTTAGGGTTCCGATTTAGTGCTTTACGGCACCTCGACCCCAAAAAACTTGAT
TAGGGTGATGGTTCACGTAGTGGGCCATCGCCCTGATAGACGGTTTTTCGCCCTTTGACG
TTGGAGTCCACGTTCTTTAATAGTGGACTCTTGTTCCAAACTGGAACAACACTCAACCCT
ATCTCGGTCTATTCTTTTGATTTATAAGGGATTTTGCCGATTTCGGCCTATTGGTTAAAA
AATGAGCTGATTTAACAAAAATTTAACGCGAATTTTAACAAAATATTAACGCTTACAATT
TAGGTGGCACTTTTCGGGGAAATGTGCGCGGAACCCCTATTTGTTTATTTTTCTAAATAC
ATTCAAATATGTATCCGCTCATGAGACAATAACCCTGATAAATGCTTCAATAATATTGAA
AAAGGAAGAGTATGAGTATTCAACATTTCCGTGTCGCCCTTATTCCCTTTTTTGCGGCAT
TTTGCCTTCCTGTTTTTGCTCACCCAGAAACGCTGGTGAAAGTAAAAGATGCTGAAGATC
AGTTGGGTGCACGAGTGGGTTACATCGAACTGGATCTCAACAGCGGTAAGATCCTTGAGA
GTTTTCGCCCCGAAGAACGTTTTCCAATGATGAGCACTTTTAAAGTTCTGCTATGTGGCG
CGGTATTATCCCGTATTGACGCCGGGCAAGAGCAACTCGGTCGCCGCATACACTATTCTC
AGAATGACTTGGTTGAGTACTCACCAGTCACAGAAAAGCATCTTACGGATGGCATGACAG
TAAGAGAATTATGCAGTGCTGCCATAACCATGAGTGATAACACTGCGGCCAACTTACTTC
TGACAACGATCGGAGGACCGAAGGAGCTAACCGCTTTTTTGCACAACATGGGGGATCATG
TAACTCGCCTTGATCGTTGGGAACCGGAGCTGAATGAAGCCATACCAAACGACGAGCGTG
ACACCACGATGCCTGTAGCAATGGCAACAACGTTGCGCAAACTATTAACTGGCGAACTAC
TTACTCTAGCTTCCCGGCAACAATTAATAGACTGGATGGAGGCGGATAAAGTTGCAGGAC
CACTTCTGCGCTCGGCCCTTCCGGCTGGCTGGTTTATTGCTGATAAATCTGGAGCCGGTG
AGCGTGGGTCTCGCGGTATCATTGCAGCACTGGGGCCAGATGGTAAGCCCTCCCGTATCG
TAGTTATCTACACGACGGGGAGTCAGGCAACTATGGATGAACGAAATAGACAGATCGCTG
AGATAGGTGCCTCACTGATTAAGCATTGGTAACTGTCAGACCAAGTTTACTCATATATAC
TTTAGATTGATTTAAAACTTCATTTTTAATTTAAAAGGATCTAGGTGAAGATCCTTTTTG
ATAATCTCATGACCAAAATCCCTTAACGTGAGTTTTCGTTCCACTGAGCGTCAGACCCCG
TAGAAAAGATCAAAGGATCTTCTTGAGATCCTTTTTTTCTGCGCGTAATCTGCTGCTTGC
AAACAAAAAAACCACCGCTACCAGCGGTGGTTTGTTTGCCGGATCAAGAGCTACCAACTC
TTTTTCCGAAGGTAACTGGCTTCAGCAGAGCGCAGATACCAAATACTGTTCTTCTAGTGT
AGCCGTAGTTAGGCCACCACTTCAAGAACTCTGTAGCACCGCCTACATACCTCGCTCTGC
TAATCCTGTTACCAGTGGCTGCTGCCAGTGGCGATAAGTCGTGTCTTACCGGGTTGGACT
CAAGACGATAGTTACCGGATAAGGCGCAGCGGTCGGGCTGAACGGGGGGTTCGTGCACAC
AGCCCAGCTTGGAGCGAACGACCTACACCGAACTGAGATACCTACAGCGTGAGCTATGAG
AAAGCGCCACGCTTCCCGAAGGGAGAAAGGCGGACAGGTATCCGGTAAGCGGCAGGGTCG
GAACAGGAGAGCGCACGAGGGAGCTTCCAGGGGGAAACGCCTGGTATCTTTATAGTCCTG
TCGGGTTTCGCCACCTCTGACTTGAGCGTCGATTTTTGTGATGCTCGTCAGGGGGGCGGA
GCCTATGGAAAAACGCCAGCAACGCGGCCTTTTTACGGTTCCTGGCCTTTTGCTGGCCTT
TTGCTCACATGTTCTTTCCTGCGTTATCCCCTGATTCTGTGGATAACCGTATTACCGCCT
TTGAGTGAGCTGATACCGCTCGCCGCAGCCGAACGACCGAGCGCAGCGAGTCAGTGAGCG
AGGAAGCGGAAGAGCGCCCAATACGCAAACCGCCTCTCCCCGCGCGTTGGCCGATTCATT
AATGCAGCTGGCACGACAGGTTTCCCGACTGGAAAGCGGGCAGTGAGCGCAACGCAATTA
ATGTGAGTTAGCTCACTCATTAGGCACCCCAGGCTTTACACTTTATGCTTCCGGCTCGTA
TGTTGTGTGGAATTGTGAGCGGATAACAATTTCACACAGGAAACAGCTATGACCATGATT
ACGCCAAGCTCGAAATTAACCCTCACTAAAGGGAACAAAAGCTGGTACCTCGCGCGACTT
GGTTTGCCATTCTTTAGCGCGCGTCGCGTCACACAGCTTGGCCACAATGTGGTTTTTGTC
AAACGAAGATTCTATGACGTGTTTAAAGTTTAGGTCGAGTAAAGCGCAAATCTTTT

## Sheet: PCR primers
For_UTR	taatacgactcactataggctattaaagctgtacaatggtgagcaagggcgag
Rev_dUTR	ttacttgtacagctcgtccat
Rev_UTR	agatgtgaccaagcgttttacttgtacagctcgtcca
