# Supplementary material for: Principles of RNA recruitment to viral ribonucleoprotein condensates in a segmented dsRNA virus
Source: eLife. 2023 Jan 26;12:e68670. doi: 10.7554/eLife.68670 (PMC9925054; doi:10.7554/eLife.68670)
Supplement: Supplementary file 2. [file elife-68670-supp2.xlsx]

## Sheet: RF_GMcDNA.quant.names
Name	Length	EffectiveLength	TPM	NumReads	description
ENSCSAT00000013367.1	1027	869.514	86024.6	34247.8	cdna;chromosome:ChlSab1.1:24:26628561:26632048:-1;gene:ENSCSAG00000015276.1;gene_biotype:protein_coding;transcript_biotype:protein_coding;description:ribosomal;protein;S29;[Source:NCBI;gene;(formerly;Entrezgene);Acc:103228935]
RF_S11_MF	667	509.574	76780.8	17914	WT
RF_S6_WT	1356	1198.51	47854	26260	WT
RF_S10_MT	751	593.561	34558.9	9392	WT
RF_S7_MT	1063	905.514	23270.7	9648	WT
RF_S4_MT	2362	2204.51	16535.2	16690	WT
RF_S8_MT	1059	901.514	15090.8	6229	WT
ENSCSAT00000018091.1	1128	970.514	10497.5	4664.68
RF_S3_MT	2591	2433.51	9217.29	10270	WT
ENSCSAT00000019172.1	384	226.854	7204.01	748.262	cdna;chromosome:ChlSab1.1:17:44716598:44716981:1;gene:ENSCSAG00000019082.1;gene_biotype:protein_coding;transcript_biotype:protein_coding;gene_symbol:H2AC14;description:histone;H2A;type;1-J;[Source:NCBI;gene;(formerly;Entrezgene);Acc:103221936]
RF_S9_WT	1074	916.514	6581.9	2762	WT
RF_S5_MT	1578	1420.51	6514.48	4237	WT
ENSCSAT00000000023.1	784	626.557	5622.64	1613	cdna;chromosome:ChlSab1.1:MT:9204:9987:1;gene:ENSCSAG00000000023.1;gene_biotype:protein_coding;transcript_biotype:protein_coding;gene_symbol:COX3;description:cytochrome;c;oxidase;subunit;III;[Source:NCBI;gene;(formerly;Entrezgene);Acc:4097494]
ENSCSAT00000009292.1	887	729.541	5478.89	1830.1	cdna;chromosome:ChlSab1.1:5:1859454:1862305:-1;gene:ENSCSAG00000011216.1;gene_biotype:protein_coding;transcript_biotype:protein_coding;gene_symbol:RPS2;description:ribosomal;protein;S2;[Source:NCBI;gene;(formerly;Entrezgene);Acc:103226440]
ENSCSAT00000019299.1	396	238.802	5304.66	580	cdna;chromosome:ChlSab1.1:1:18223877:18224272:1;gene:ENSCSAG00000019209.1;gene_biotype:protein_coding;transcript_biotype:protein_coding;description:60S;ribosomal;protein;L41;[Source:NCBI;gene;(formerly;Entrezgene);Acc:103236258]
RF_S2_MT	2687	2529.51	5222.06	6048	WT
ENSCSAT00000019176.1	378	220.885	5187.56	524.641	cdna;chromosome:ChlSab1.1:17:45363109:45363486:1;gene:ENSCSAG00000019086.1;gene_biotype:protein_coding;transcript_biotype:protein_coding;gene_symbol:H2BC12;description:histone;H2B;type;1-K;[Source:NCBI;gene;(formerly;Entrezgene);Acc:103221972]
ENSCSAT00000000289.1	980	822.515	4970.23	1871.78	cdna;chromosome:ChlSab1.1:11:115547427:115550209:-1;gene:ENSCSAG00000002270.1;gene_biotype:protein_coding;transcript_biotype:protein_coding
ENSCSAT00000018330.1	408	250.763	4816.47	553	cdna;scaffold:ChlSab1.1:AQIB01158164.1:9035:9442:1;gene:ENSCSAG00000000205.1;gene_biotype:protein_coding;transcript_biotype:protein_coding;description:histone;H3;[Source:NCBI;gene;(formerly;Entrezgene);Acc:103247786]
ENSCSAT00000012134.1	1419	1261.51	4476.95	2585.87	cdna;chromosome:ChlSab1.1:17:1627901:1630150:1;gene:ENSCSAG00000014041.1;gene_biotype:protein_coding;transcript_biotype:protein_coding;gene_symbol:EEF1A1;description:eukaryotic;translation;elongation;factor;1;alpha;1;[Source:NCBI;gene;(formerly;Entrezgene);Acc:103243896]
ENSCSAT00000019189.1	408	250.763	3989.05	458	cdna;chromosome:ChlSab1.1:17:46223937:46224344:1;gene:ENSCSAG00000019099.1;gene_biotype:protein_coding;transcript_biotype:protein_coding;description:histone;H3.1;[Source:NCBI;gene;(formerly;Entrezgene);Acc:103221946]
ENSCSAT00000008610.1	1709	1551.51	3687.75	2619.69	cdna;chromosome:ChlSab1.1:11:6568975:6573238:1;gene:ENSCSAG00000010531.1;gene_biotype:protein_coding;transcript_biotype:protein_coding;description:glyceraldehyde-3-phosphate;dehydrogenase;[Source:NCBI;gene;(formerly;Entrezgene);Acc:103218453]
ENSCSAT00000016543.1	740	582.567	3516.33	937.927	cdna;chromosome:ChlSab1.1:11:120277927:120279495:-1;gene:ENSCSAG00000001986.1;gene_biotype:protein_coding;transcript_biotype:protein_coding
ENSCSAT00000019173.1	378	220.885	3512.46	355.231	cdna;chromosome:ChlSab1.1:17:44723432:44723809:1;gene:ENSCSAG00000019083.1;gene_biotype:protein_coding;transcript_biotype:protein_coding;gene_symbol:H2BC13;description:histone;H2B;type;1-F/J/L;[Source:NCBI;gene;(formerly;Entrezgene);Acc:103221948]
ENSCSAT00000019328.1	309	152.993	3411.88	239	cdna;chromosome:ChlSab1.1:11:14670283:14670591:-1;gene:ENSCSAG00000019238.1;gene_biotype:protein_coding;transcript_biotype:protein_coding;gene_symbol:H4-16;description:histone;H4;[Source:NCBI;gene;(formerly;Entrezgene);Acc:103221971]
RF_S1_MT	3302	3144.51	3351.97	4826	WT
ENSCSAT00000018329.1	390	232.825	3166	337.5	cdna;scaffold:ChlSab1.1:AQIB01158164.1:7552:7941:1;gene:ENSCSAG00000000206.1;gene_biotype:protein_coding;transcript_biotype:protein_coding;gene_symbol:H2AC19;description:histone;H2A;type;2-A;[Source:NCBI;gene;(formerly;Entrezgene);Acc:103247785]
ENSCSAT00000000016.1	1539	1381.51	3032.22	1918	cdna;chromosome:ChlSab1.1:MT:5899:7437:1;gene:ENSCSAG00000000016.1;gene_biotype:protein_coding;transcript_biotype:protein_coding;gene_symbol:COX1;description:cytochrome;c;oxidase;subunit;I;[Source:NCBI;gene;(formerly;Entrezgene);Acc:4097490]
ENSCSAT00000016933.1	696	538.574	2996.86	739	cdna;chromosome:ChlSab1.1:6:50663431:50670230:1;gene:ENSCSAG00000001598.1;gene_biotype:protein_coding;transcript_biotype:protein_coding;gene_symbol:RPS5;description:ribosomal;protein;S5;[Source:NCBI;gene;(formerly;Entrezgene);Acc:103235456]
ENSCSAT00000019187.1	378	220.885	2949.5	298.296	cdna;chromosome:ChlSab1.1:17:46211652:46212029:1;gene:ENSCSAG00000019097.1;gene_biotype:protein_coding;transcript_biotype:protein_coding;gene_symbol:H2BC3;description:H2B;clustered;histone;3;[Source:HGNC;Symbol;Acc:HGNC:4751]
ENSCSAT00000019183.1	390	232.825	2577.5	274.765	cdna;chromosome:ChlSab1.1:17:46131904:46132293:-1;gene:ENSCSAG00000019093.1;gene_biotype:protein_coding;transcript_biotype:protein_coding;gene_symbol:H2AC6;description:histone;H2A;type;1-C;[Source:NCBI;gene;(formerly;Entrezgene);Acc:103222014]
ENSCSAT00000001195.1	1449	1291.51	2504.51	1481	cdna;chromosome:ChlSab1.1:7:112724224:112725674:1;gene:ENSCSAG00000003167.1;gene_biotype:pseudogene;transcript_biotype:pseudogene
ENSCSAT00000000019.1	684	526.574	2501.06	603	cdna;chromosome:ChlSab1.1:MT:7582:8265:1;gene:ENSCSAG00000000019.1;gene_biotype:protein_coding;transcript_biotype:protein_coding;gene_symbol:COX2;description:cytochrome;c;oxidase;subunit;II;[Source:NCBI;gene;(formerly;Entrezgene);Acc:4097491]
ENSCSAT00000018314.1	378	220.885	2404	243.128	cdna;scaffold:ChlSab1.1:KE148049.1:364420:364797:-1;gene:ENSCSAG00000000221.1;gene_biotype:protein_coding;transcript_biotype:protein_coding;gene_symbol:H2BC18;description:histone;H2B;type;2-F;[Source:NCBI;gene;(formerly;Entrezgene);Acc:103247165]
ENSCSAT00000018845.1	582	424.61	2360.96	459	cdna;chromosome:ChlSab1.1:2:26620653:26621234:-1;gene:ENSCSAG00000018755.1;gene_biotype:protein_coding;transcript_biotype:protein_coding
ENSCSAT00000004196.1	1890	1732.51	2184.6	1732.93	cdna;chromosome:ChlSab1.1:11:45364873:45368752:-1;gene:ENSCSAG00000006157.1;gene_biotype:protein_coding;transcript_biotype:protein_coding;gene_symbol:TUBA1B;description:tubulin;alpha;1b;[Source:NCBI;gene;(formerly;Entrezgene);Acc:103238260]
ENSCSAT00000015767.1	3231	3073.51	2181.62	3070.06	cdna;chromosome:ChlSab1.1:28:16195607:16199048:1;gene:ENSCSAG00000017672.1;gene_biotype:protein_coding;transcript_biotype:protein_coding
ENSCSAT00000019166.1	378	220.885	2173.27	219.793	cdna;chromosome:ChlSab1.1:17:44639024:44639401:-1;gene:ENSCSAG00000019076.1;gene_biotype:protein_coding;transcript_biotype:protein_coding;gene_symbol:H2BC17;description:histone;cluster;1,;H2bo;[Source:NCBI;gene;(formerly;Entrezgene);Acc:103221933]
ENSCSAT00000019169.1	378	220.885	2170.13	219.475	cdna;chromosome:ChlSab1.1:17:44693564:44693941:-1;gene:ENSCSAG00000019079.1;gene_biotype:protein_coding;transcript_biotype:protein_coding;gene_symbol:H2BC15;description:histone;H2B;type;1-N;[Source:NCBI;gene;(formerly;Entrezgene);Acc:103221940]
ENSCSAT00000019184.1	378	220.885	2158.59	218.308	cdna;chromosome:ChlSab1.1:17:46132622:46132999:1;gene:ENSCSAG00000019094.1;gene_biotype:protein_coding;transcript_biotype:protein_coding;description:histone;H2B;type;1;[Source:NCBI;gene;(formerly;Entrezgene);Acc:103221994]
ENSCSAT00000019177.1	378	220.885	2092.83	211.658	cdna;chromosome:ChlSab1.1:17:45377815:45378192:1;gene:ENSCSAG00000019087.1;gene_biotype:protein_coding;transcript_biotype:protein_coding;gene_symbol:H2BC11;description:histone;H2B;type;1-J;[Source:NCBI;gene;(formerly;Entrezgene);Acc:103221969]
ENSCSAT00000010108.1	2416	2258.51	2078.17	2149	cdna;chromosome:ChlSab1.1:8:95561930:95578633:-1;gene:ENSCSAG00000012017.1;gene_biotype:protein_coding;transcript_biotype:protein_coding;gene_symbol:PABPC1;description:poly(A);binding;protein;cytoplasmic;1;[Source:NCBI;gene;(formerly;Entrezgene);Acc:103237219]
ENSCSAT00000019179.1	408	250.763	2062.29	236.78	cdna;chromosome:ChlSab1.1:17:46006665:46007072:1;gene:ENSCSAG00000019089.1;gene_biotype:protein_coding;transcript_biotype:protein_coding;description:histone;H3.1;[Source:NCBI;gene;(formerly;Entrezgene);Acc:103221946]
ENSCSAT00000016233.1	755	597.561	2017.55	552	cdna;chromosome:ChlSab1.1:28:10442398:10443855:1;gene:ENSCSAG00000018137.1;gene_biotype:protein_coding;transcript_biotype:protein_coding;gene_symbol:HSPB1;description:heat;shock;protein;beta-1;[Source:NCBI;gene;(formerly;Entrezgene);Acc:103246661]
ENSCSAT00000019154.1	560	402.615	2017.04	371.824	cdna;chromosome:ChlSab1.1:9:11640208:11640767:1;gene:ENSCSAG00000019064.1;gene_biotype:processed_pseudogene;transcript_biotype:processed_pseudogene
ENSCSAT00000003617.1	1059	901.514	2009.04	829.266	cdna;chromosome:ChlSab1.1:11:49078048:49081642:1;gene:ENSCSAG00000005581.1;gene_biotype:protein_coding;transcript_biotype:protein_coding;description:keratin;18;[Source:NCBI;gene;(formerly;Entrezgene);Acc:103239494]
ENSCSAT00000018388.1	501	343.661	2001.92	315	cdna;chromosome:ChlSab1.1:20:76655213:76655713:-1;gene:ENSCSAG00000000147.1;gene_biotype:protein_coding;transcript_biotype:protein_coding;description:cofilin-1;[Source:NCBI;gene;(formerly;Entrezgene);Acc:103224743]
ENSCSAT00000018059.1	686	528.574	1975.1	478	cdna;chromosome:ChlSab1.1:12:21401910:21402595:1;gene:ENSCSAG00000000476.1;gene_biotype:protein_coding;transcript_biotype:protein_coding
ENSCSAT00000019682.1	132	30.24	1930.56	26.73	cdna;chromosome:ChlSab1.1:21:1750215:1750346:-1;gene:ENSCSAG00000019592.1;gene_biotype:protein_coding;transcript_biotype:protein_coding;description:thymosin;beta;10;[Source:NCBI;gene;(formerly;Entrezgene);Acc:103219961]
ENSCSAT00000019727.1	345	188.219	1926.24	166	cdna;chromosome:ChlSab1.1:6:40596460:40596804:-1;gene:ENSCSAG00000019637.1;gene_biotype:protein_coding;transcript_biotype:protein_coding
ENSCSAT00000001861.1	838	680.542	1892.62	589.729	cdna;chromosome:ChlSab1.1:6:34039251:34042313:-1;gene:ENSCSAG00000003832.1;gene_biotype:protein_coding;transcript_biotype:protein_coding;gene_symbol:RPS16;description:ribosomal;protein;S16;[Source:NCBI;gene;(formerly;Entrezgene);Acc:103234673]
ENSCSAT00000018291.1	372	214.928	1829.14	180	cdna;chromosome:ChlSab1.1:25:45620739:45621110:-1;gene:ENSCSAG00000000244.1;gene_biotype:protein_coding;transcript_biotype:protein_coding
ENSCSAT00000018544.1	668	510.574	1684.45	393.776	cdna;chromosome:ChlSab1.1:9:102846950:102847617:1;gene:ENSCSAG00000018454.1;gene_biotype:protein_coding;transcript_biotype:protein_coding;description:60S;ribosomal;protein;L10-like;[Source:NCBI;gene;(formerly;Entrezgene);Acc:103216492]
ENSCSAT00000018249.1	888	730.541	1672.28	559.353	cdna;chromosome:ChlSab1.1:X:118703635:118704522:1;gene:ENSCSAG00000000286.1;gene_biotype:protein_coding;transcript_biotype:protein_coding;description:40S;ribosomal;protein;SA-like;[Source:NCBI;gene;(formerly;Entrezgene);Acc:103232697]
ENSCSAT00000012689.1	541	383.633	1656.7	291	cdna;chromosome:ChlSab1.1:8:52108568:52110016:-1;gene:ENSCSAG00000014597.1;gene_biotype:protein_coding;transcript_biotype:protein_coding;description:40S;ribosomal;protein;S20;[Source:NCBI;gene;(formerly;Entrezgene);Acc:103227869]
ENSCSAT00000008347.1	390	232.825	1632.25	174	cdna;chromosome:ChlSab1.1:5:2763714:2765137:1;gene:ENSCSAG00000010276.1;gene_biotype:protein_coding;transcript_biotype:protein_coding;description:TNF;receptor;superfamily;member;12A;[Source:NCBI;gene;(formerly;Entrezgene);Acc:103227098]
ENSCSAT00000019188.1	390	232.825	1620.74	172.773	cdna;chromosome:ChlSab1.1:17:46222435:46222824:1;gene:ENSCSAG00000019098.1;gene_biotype:protein_coding;transcript_biotype:protein_coding;description:histone;H2A;type;1;[Source:NCBI;gene;(formerly;Entrezgene);Acc:103222003]
ENSCSAT00000019186.1	639	481.587	1573.7	347	cdna;chromosome:ChlSab1.1:17:46199304:46199942:1;gene:ENSCSAG00000019096.1;gene_biotype:protein_coding;transcript_biotype:protein_coding;gene_symbol:H1-2;description:H1.2;linker;histone,;cluster;member;[Source:NCBI;gene;(formerly;Entrezgene);Acc:103222020]
ENSCSAT00000011027.1	713	555.573	1539.85	391.699	cdna;chromosome:ChlSab1.1:16:4426962:4429713:-1;gene:ENSCSAG00000012934.1;gene_biotype:protein_coding;transcript_biotype:protein_coding;gene_symbol:PFN1;description:profilin;1;[Source:NCBI;gene;(formerly;Entrezgene);Acc:103242213]
ENSCSAT00000011706.1	517	359.647	1539.39	253.489	cdna;chromosome:ChlSab1.1:26:14002075:14004474:-1;gene:ENSCSAG00000013638.1;gene_biotype:protein_coding;transcript_biotype:protein_coding;gene_symbol:RPLP1;description:ribosomal;protein;lateral;stalk;subunit;P1;[Source:NCBI;gene;(formerly;Entrezgene);Acc:103245406]
ENSCSAT00000019834.1	567	409.613	1524.96	286	cdna;chromosome:ChlSab1.1:26:30494486:30495052:-1;gene:ENSCSAG00000019744.1;gene_biotype:protein_coding;transcript_biotype:protein_coding;description:60S;ribosomal;protein;L18;[Source:NCBI;gene;(formerly;Entrezgene);Acc:103245600]
ENSCSAT00000010201.1	868	710.541	1521.54	495	cdna;chromosome:ChlSab1.1:6:1211713:1214044:1;gene:ENSCSAG00000012113.1;gene_biotype:protein_coding;transcript_biotype:protein_coding;gene_symbol:RPS15;description:ribosomal;protein;S15;[Source:NCBI;gene;(formerly;Entrezgene);Acc:103233608]
ENSCSAT00000016869.1	456	298.699	1498.95	205	cdna;chromosome:ChlSab1.1:6:49399056:49399512:-1;gene:ENSCSAG00000001661.1;gene_biotype:pseudogene;transcript_biotype:pseudogene
ENSCSAT00000019181.1	390	232.825	1471.53	156.867	cdna;chromosome:ChlSab1.1:17:46052968:46053357:1;gene:ENSCSAG00000019091.1;gene_biotype:protein_coding;transcript_biotype:protein_coding;gene_symbol:H2AC7;description:histone;H2A;type;1-D;[Source:NCBI;gene;(formerly;Entrezgene);Acc:103221997]
ENSCSAT00000000035.1	1141	983.514	1467.87	661	cdna;chromosome:ChlSab1.1:MT:14732:15872:1;gene:ENSCSAG00000000035.1;gene_biotype:protein_coding;transcript_biotype:protein_coding;gene_symbol:CYTB;description:cytochrome;b;[Source:NCBI;gene;(formerly;Entrezgene);Acc:4097500]
ENSCSAT00000018693.1	371	213.936	1430.72	140.143	cdna;chromosome:ChlSab1.1:8:97021222:97021592:1;gene:ENSCSAG00000018603.1;gene_biotype:protein_coding;transcript_biotype:protein_coding
ENSCSAT00000004521.1	549	391.628	1403.57	251.676	cdna;chromosome:ChlSab1.1:1:11838109:11840793:1;gene:ENSCSAG00000006491.1;gene_biotype:protein_coding;transcript_biotype:protein_coding;gene_symbol:FTH1;description:ferritin;heavy;chain;1;[Source:HGNC;Symbol;Acc:HGNC:3976]
ENSCSAT00000019182.1	657	499.585	1394.6	319	cdna;chromosome:ChlSab1.1:17:46099330:46099986:-1;gene:ENSCSAG00000019092.1;gene_biotype:protein_coding;transcript_biotype:protein_coding;gene_symbol:H1-4;description:H1.4;linker;histone,;cluster;member;[Source:NCBI;gene;(formerly;Entrezgene);Acc:103222013]
ENSCSAT00000000027.1	297	141.524	1388.92	90	cdna;chromosome:ChlSab1.1:MT:10461:10757:1;gene:ENSCSAG00000000027.1;gene_biotype:protein_coding;transcript_biotype:protein_coding;gene_symbol:ND4L;description:NADH;dehydrogenase;subunit;4L;[Source:NCBI;gene;(formerly;Entrezgene);Acc:4097496]
ENSCSAT00000009221.1	853	695.541	1378.37	438.956	cdna;chromosome:ChlSab1.1:X:62093902:62097466:-1;gene:ENSCSAG00000011155.1;gene_biotype:protein_coding;transcript_biotype:protein_coding;description:40S;ribosomal;protein;S4,;X;isoform-like;[Source:NCBI;gene;(formerly;Entrezgene);Acc:103220461]
ENSCSAT00000013771.1	712	554.573	1365.47	346.718	cdna;chromosome:ChlSab1.1:21:13876099:13883462:-1;gene:ENSCSAG00000015690.1;gene_biotype:protein_coding;transcript_biotype:protein_coding;gene_symbol:PPIA;description:peptidyl-prolyl;cis-trans;isomerase;A-like;[Source:NCBI;gene;(formerly;Entrezgene);Acc:103220310]
ENSCSAT00000018821.1	498	340.663	1327.44	207.049	cdna;chromosome:ChlSab1.1:22:93369640:93370137:-1;gene:ENSCSAG00000018731.1;gene_biotype:protein_coding;transcript_biotype:protein_coding;description:ribosomal;protein;S10;[Source:NCBI;gene;(formerly;Entrezgene);Acc:103221637]
ENSCSAT00000007980.1	2220	2062.51	1315.2	1242	cdna;chromosome:ChlSab1.1:1:1570069:1581833:-1;gene:ENSCSAG00000009899.1;gene_biotype:protein_coding;transcript_biotype:protein_coding;gene_symbol:CTSD;description:cathepsin;D;[Source:NCBI;gene;(formerly;Entrezgene);Acc:103236841]
ENSCSAT00000004203.1	1382	1224.51	1302.04	730	cdna;chromosome:ChlSab1.1:5:26588868:26592112:-1;gene:ENSCSAG00000006167.1;gene_biotype:protein_coding;transcript_biotype:protein_coding;gene_symbol:ALDOA;description:aldolase,;fructose-bisphosphate;A;[Source:NCBI;gene;(formerly;Entrezgene);Acc:103230584]
ENSCSAT00000006330.1	1542	1384.51	1280.93	812	cdna;chromosome:ChlSab1.1:17:41729143:41733243:-1;gene:ENSCSAG00000008279.1;gene_biotype:protein_coding;transcript_biotype:protein_coding;gene_symbol:TUBB;description:tubulin;beta;class;I;[Source:NCBI;gene;(formerly;Entrezgene);Acc:103221819]
ENSCSAT00000015765.1	1623	1465.51	1272.16	853.617	cdna;chromosome:ChlSab1.1:28:16204659:16206819:1;gene:ENSCSAG00000017671.1;gene_biotype:protein_coding;transcript_biotype:protein_coding
ENSCSAT00000017940.1	432	274.724	1271.04	159.877	cdna;chromosome:ChlSab1.1:1:110467775:110468206:-1;gene:ENSCSAG00000000595.1;gene_biotype:protein_coding;transcript_biotype:protein_coding;gene_symbol:H2AX;description:histone;H2AX;[Source:NCBI;gene;(formerly;Entrezgene);Acc:103248619]
ENSCSAT00000018361.1	204	64.417	1254.49	37	cdna;chromosome:ChlSab1.1:20:14238005:14238208:-1;gene:ENSCSAG00000000174.1;gene_biotype:protein_coding;transcript_biotype:protein_coding
ENSCSAT00000019171.1	378	220.885	1245.87	126	cdna;chromosome:ChlSab1.1:17:44715922:44716299:-1;gene:ENSCSAG00000019081.1;gene_biotype:protein_coding;transcript_biotype:protein_coding;gene_symbol:H2BC14;description:histone;H2B;type;1-M;[Source:NCBI;gene;(formerly;Entrezgene);Acc:103221937]
ENSCSAT00000019144.1	609	451.594	1232.75	254.892	cdna;chromosome:ChlSab1.1:9:13383840:13384448:-1;gene:ENSCSAG00000019054.1;gene_biotype:protein_coding;transcript_biotype:protein_coding
ENSCSAT00000018318.1	387	229.838	1218.24	128.2	cdna;scaffold:ChlSab1.1:KE148049.1:389997:390383:1;gene:ENSCSAG00000000217.1;gene_biotype:protein_coding;transcript_biotype:protein_coding;gene_symbol:H2AC20;description:histone;cluster;2;H2A;family;member;c;[Source:NCBI;gene;(formerly;Entrezgene);Acc:103247168]
ENSCSAT00000013671.1	1425	1267.51	1190.67	691	cdna;chromosome:ChlSab1.1:2:5233874:5249192:-1;gene:ENSCSAG00000015577.1;gene_biotype:protein_coding;transcript_biotype:protein_coding;description:GNAS;complex;locus;[Source:NCBI;gene;(formerly;Entrezgene);Acc:103243509]
ENSCSAT00000008635.1	635	477.588	1184.44	259	cdna;chromosome:ChlSab1.1:1:612490:620805:1;gene:ENSCSAG00000010551.1;gene_biotype:protein_coding;transcript_biotype:protein_coding;gene_symbol:RPLP2;description:ribosomal;protein;lateral;stalk;subunit;P2;[Source:NCBI;gene;(formerly;Entrezgene);Acc:103233927]
ENSCSAT00000016062.1	1209	1051.51	1183.43	569.757	cdna;scaffold:ChlSab1.1:KE147546.1:215924:217134:-1;gene:ENSCSAG00000017963.1;gene_biotype:pseudogene;transcript_biotype:pseudogene
ENSCSAT00000002482.1	508	350.651	1176.09	188.821	cdna;chromosome:ChlSab1.1:1:56112635:56115639:-1;gene:ENSCSAG00000004449.1;gene_biotype:protein_coding;transcript_biotype:protein_coding;description:ribosomal;protein;L27a;[Source:NCBI;gene;(formerly;Entrezgene);Acc:103240741]
ENSCSAT00000018111.1	132	30.24	1155.6	16	cdna;chromosome:ChlSab1.1:7:12963948:12964079:1;gene:ENSCSAG00000000424.1;gene_biotype:protein_coding;transcript_biotype:protein_coding
ENSCSAT00000019170.1	390	232.825	1092.44	116.456	cdna;chromosome:ChlSab1.1:17:44694268:44694657:1;gene:ENSCSAG00000019080.1;gene_biotype:protein_coding;transcript_biotype:protein_coding;description:histone;cluster;1,;H2am;[Source:NCBI;gene;(formerly;Entrezgene);Acc:103221935]
ENSCSAT00000005949.1	712	554.573	1081.09	274.507	cdna;chromosome:ChlSab1.1:17:46084646:46098299:-1;gene:ENSCSAG00000007899.1;gene_biotype:protein_coding;transcript_biotype:protein_coding;gene_symbol:H2BC5;description:H2B;clustered;histone;5;[Source:HGNC;Symbol;Acc:HGNC:4747]
ENSCSAT00000007846.1	741	583.567	1059.16	283	cdna;chromosome:ChlSab1.1:15:68596968:68599389:1;gene:ENSCSAG00000009762.1;gene_biotype:protein_coding;transcript_biotype:protein_coding;gene_symbol:RPL15;description:ribosomal;protein;L15;[Source:NCBI;gene;(formerly;Entrezgene);Acc:103241763]
ENSCSAT00000016112.1	3521	3363.51	1055.18	1625	cdna;chromosome:ChlSab1.1:28:12047529:12060202:-1;gene:ENSCSAG00000018011.1;gene_biotype:protein_coding;transcript_biotype:protein_coding;gene_symbol:SERPINE1;description:serpin;family;E;member;1;[Source:NCBI;gene;(formerly;Entrezgene);Acc:103246698]
ENSCSAT00000014101.1	334	177.358	1046.73	85	cdna;chromosome:ChlSab1.1:2:1841865:1843087:-1;gene:ENSCSAG00000016013.1;gene_biotype:protein_coding;transcript_biotype:protein_coding;gene_symbol:RPS21;description:ribosomal;protein;S21;[Source:NCBI;gene;(formerly;Entrezgene);Acc:103243068]
ENSCSAT00000018629.1	72	12.54	1045.03	6	cdna;chromosome:ChlSab1.1:8:47431768:47431839:1;gene:ENSCSAG00000018539.1;gene_biotype:protein_coding;transcript_biotype:protein_coding
ENSCSAT00000018166.1	801	643.545	1040.38	306.552	cdna;chromosome:ChlSab1.1:29:4165145:4165945:-1;gene:ENSCSAG00000000369.1;gene_biotype:protein_coding;transcript_biotype:protein_coding;description:60S;ribosomal;protein;L7a;[Source:NCBI;gene;(formerly;Entrezgene);Acc:103231118]
ENSCSAT00000018316.1	378	220.885	1036.4	104.815	cdna;scaffold:ChlSab1.1:KE148049.1:389285:389662:-1;gene:ENSCSAG00000000219.1;gene_biotype:protein_coding;transcript_biotype:protein_coding;gene_symbol:H2BC21;description:histone;cluster;2;H2B;family;member;e;[Source:NCBI;gene;(formerly;Entrezgene);Acc:103247167]
ENSCSAT00000010791.1	2015	1857.51	1027.65	874	cdna;chromosome:ChlSab1.1:9:17183388:17191829:1;gene:ENSCSAG00000012697.1;gene_biotype:protein_coding;transcript_biotype:protein_coding;gene_symbol:VIM;description:vimentin;[Source:NCBI;gene;(formerly;Entrezgene);Acc:103237952]
ENSCSAT00000005866.1	2844	2686.51	1020.28	1255	cdna;chromosome:ChlSab1.1:9:62052027:62099221:-1;gene:ENSCSAG00000007877.1;gene_biotype:protein_coding;transcript_biotype:protein_coding;gene_symbol:HKDC1;description:hexokinase;domain;containing;1;[Source:NCBI;gene;(formerly;Entrezgene);Acc:103216076]
ENSCSAT00000003500.1	893	735.538	1009.58	340	cdna;chromosome:ChlSab1.1:6:16335857:16339620:1;gene:ENSCSAG00000005467.1;gene_biotype:protein_coding;transcript_biotype:protein_coding;gene_symbol:RPL18A;description:ribosomal;protein;L18a;[Source:NCBI;gene;(formerly;Entrezgene);Acc:103234157]
ENSCSAT00000018734.1	1596	1438.51	1006.83	663.138	cdna;chromosome:ChlSab1.1:10:22076084:22077679:-1;gene:ENSCSAG00000018644.1;gene_biotype:protein_coding;transcript_biotype:protein_coding;description:pyruvate;kinase;PKM;[Source:NCBI;gene;(formerly;Entrezgene);Acc:103217002]
ENSCSAT00000001948.1	750	592.561	1002.54	272	cdna;chromosome:ChlSab1.1:1:66629954:66635344:1;gene:ENSCSAG00000003937.1;gene_biotype:protein_coding;transcript_biotype:protein_coding;gene_symbol:RPS3;description:ribosomal;protein;S3;[Source:NCBI;gene;(formerly;Entrezgene);Acc:103248057]
ENSCSAT00000000006.1	956	798.518	995.597	364	cdna;chromosome:ChlSab1.1:MT:3303:4258:1;gene:ENSCSAG00000000006.1;gene_biotype:protein_coding;transcript_biotype:protein_coding;gene_symbol:ND1;description:NADH;dehydrogenase;subunit;1;[Source:NCBI;gene;(formerly;Entrezgene);Acc:4097488]
ENSCSAT00000009109.1	678	520.574	994.335	237	cdna;chromosome:ChlSab1.1:19:7000793:7001757:1;gene:ENSCSAG00000011019.1;gene_biotype:protein_coding;transcript_biotype:protein_coding;gene_symbol:MIF;description:macrophage;migration;inhibitory;factor;[Source:NCBI;gene;(formerly;Entrezgene);Acc:103223031]
ENSCSAT00000019843.1	153	37.84	981.228	17	cdna;chromosome:ChlSab1.1:26:48140075:48140227:-1;gene:ENSCSAG00000019753.1;gene_biotype:protein_coding;transcript_biotype:protein_coding
ENSCSAT00000006269.1	1912	1754.51	980.01	787.264	cdna;chromosome:ChlSab1.1:8:138989165:138992554:-1;gene:ENSCSAG00000008214.1;gene_biotype:protein_coding;transcript_biotype:protein_coding;gene_symbol:RPL8;description:ribosomal;protein;L8;[Source:NCBI;gene;(formerly;Entrezgene);Acc:103237648]
ENSCSAT00000007475.1	801	643.545	977.417	288	cdna;chromosome:ChlSab1.1:12:60353817:60357759:1;gene:ENSCSAG00000009408.1;gene_biotype:protein_coding;transcript_biotype:protein_coding;description:ribosomal;protein;S6;[Source:NCBI;gene;(formerly;Entrezgene);Acc:103219399]
ENSCSAT00000015350.1	345	188.219	945.694	81.498	cdna;chromosome:ChlSab1.1:13:21644213:21644561:-1;gene:ENSCSAG00000017256.1;gene_biotype:pseudogene;transcript_biotype:pseudogene
ENSCSAT00000004597.1	1608	1450.51	941.077	625	cdna;chromosome:ChlSab1.1:1:11326969:11339439:1;gene:ENSCSAG00000006560.1;gene_biotype:protein_coding;transcript_biotype:protein_coding;gene_symbol:EEF1G;description:eukaryotic;translation;elongation;factor;1;gamma;[Source:NCBI;gene;(formerly;Entrezgene);Acc:103234055]
ENSCSAT00000007859.1	370	212.945	933.34	91	cdna;chromosome:ChlSab1.1:17:37849412:37853880:-1;gene:ENSCSAG00000009775.1;gene_biotype:protein_coding;transcript_biotype:protein_coding;gene_symbol:HMGA1;description:high;mobility;group;AT-hook;1;[Source:NCBI;gene;(formerly;Entrezgene);Acc:103221639]
ENSCSAT00000009556.1	1298	1140.51	890.47	465	cdna;chromosome:ChlSab1.1:16:6949628:6956026:1;gene:ENSCSAG00000011468.1;gene_biotype:protein_coding;transcript_biotype:protein_coding;gene_symbol:EIF4A1;description:eukaryotic;translation;initiation;factor;4A1;[Source:NCBI;gene;(formerly;Entrezgene);Acc:103242314]
ENSCSAT00000012233.1	576	418.61	888.315	170.259	cdna;chromosome:ChlSab1.1:14:51664101:51667011:-1;gene:ENSCSAG00000014143.1;gene_biotype:protein_coding;transcript_biotype:protein_coding;gene_symbol:RPS27A;description:ribosomal;protein;S27a;[Source:NCBI;gene;(formerly;Entrezgene);Acc:103220242]
ENSCSAT00000018717.1	1008	850.514	865.885	337.19	cdna;chromosome:ChlSab1.1:3:2981145:2982152:-1;gene:ENSCSAG00000018627.1;gene_biotype:processed_pseudogene;transcript_biotype:processed_pseudogene
ENSCSAT00000000676.1	431	273.724	861.743	108	cdna;chromosome:ChlSab1.1:16:67341616:67345089:1;gene:ENSCSAG00000002658.1;gene_biotype:protein_coding;transcript_biotype:protein_coding
ENSCSAT00000018037.1	291	135.871	857.574	53.35	cdna;chromosome:ChlSab1.1:23:41293910:41294200:-1;gene:ENSCSAG00000000498.1;gene_biotype:protein_coding;transcript_biotype:protein_coding;description:60S;ribosomal;protein;L37;[Source:NCBI;gene;(formerly;Entrezgene);Acc:103244604]
ENSCSAT00000018862.1	888	730.541	852.295	285.081	cdna;chromosome:ChlSab1.1:10:94720255:94721142:1;gene:ENSCSAG00000018772.1;gene_biotype:protein_coding;transcript_biotype:protein_coding;description:40S;ribosomal;protein;SA-like;[Source:NCBI;gene;(formerly;Entrezgene);Acc:103217743]
ENSCSAT00000019106.1	619	461.594	839.356	177.394	cdna;chromosome:ChlSab1.1:16:58958785:58959403:1;gene:ENSCSAG00000019016.1;gene_biotype:protein_coding;transcript_biotype:protein_coding;description:ribosomal;protein;L29;[Source:NCBI;gene;(formerly;Entrezgene);Acc:103227713]
ENSCSAT00000019565.1	456	298.699	839.125	114.761	cdna;scaffold:ChlSab1.1:KE148108.1:2627522:2627977:-1;gene:ENSCSAG00000019475.1;gene_biotype:protein_coding;transcript_biotype:protein_coding;description:myosin;light;polypeptide;6;[Source:NCBI;gene;(formerly;Entrezgene);Acc:103247367]
ENSCSAT00000019238.1	345	188.219	835.478	72	cdna;chromosome:ChlSab1.1:21:107921976:107922320:-1;gene:ENSCSAG00000019148.1;gene_biotype:protein_coding;transcript_biotype:protein_coding
ENSCSAT00000018975.1	318	161.724	826.093	61.17	cdna;chromosome:ChlSab1.1:15:15113688:15114005:-1;gene:ENSCSAG00000018885.1;gene_biotype:protein_coding;transcript_biotype:protein_coding;description:thioredoxin;[Source:NCBI;gene;(formerly;Entrezgene);Acc:103219027]
ENSCSAT00000001565.1	1090	932.514	819.747	350	cdna;chromosome:ChlSab1.1:11:93892630:93899754:1;gene:ENSCSAG00000003535.1;gene_biotype:protein_coding;transcript_biotype:protein_coding;gene_symbol:SLC25A3;description:solute;carrier;family;25;member;3;[Source:NCBI;gene;(formerly;Entrezgene);Acc:103238921]
ENSCSAT00000009697.1	788	630.556	810.512	234	cdna;chromosome:ChlSab1.1:6:2061811:2065265:1;gene:ENSCSAG00000011660.1;gene_biotype:protein_coding;transcript_biotype:protein_coding;gene_symbol:OAZ1;description:ornithine;decarboxylase;antizyme;1;[Source:HGNC;Symbol;Acc:HGNC:8095]
ENSCSAT00000019011.1	405	247.772	803.393	91.141	cdna;chromosome:ChlSab1.1:11:79856860:79857264:-1;gene:ENSCSAG00000018921.1;gene_biotype:protein_coding;transcript_biotype:protein_coding;description:60S;ribosomal;protein;L32;[Source:NCBI;gene;(formerly;Entrezgene);Acc:103222559]
ENSCSAT00000011818.1	642	484.586	796.635	176.751	cdna;chromosome:ChlSab1.1:12:10677134:10683572:1;gene:ENSCSAG00000013731.1;gene_biotype:protein_coding;transcript_biotype:protein_coding
ENSCSAT00000003546.1	924	766.52	780.717	274	cdna;chromosome:ChlSab1.1:16:42176524:42182019:-1;gene:ENSCSAG00000005514.1;gene_biotype:protein_coding;transcript_biotype:protein_coding;gene_symbol:NME2;description:NME/NM23;nucleoside;diphosphate;kinase;2;[Source:NCBI;gene;(formerly;Entrezgene);Acc:103242911]
ENSCSAT00000017104.1	1146	988.514	775.517	351	cdna;chromosome:ChlSab1.1:20:47783935:47785997:-1;gene:ENSCSAG00000001429.1;gene_biotype:protein_coding;transcript_biotype:protein_coding;gene_symbol:CCN1;description:cellular;communication;network;factor;1;[Source:NCBI;gene;(formerly;Entrezgene);Acc:103224516]
ENSCSAT00000003521.1	1810	1652.51	770.469	582.953	cdna;chromosome:ChlSab1.1:11:49551245:49576642:1;gene:ENSCSAG00000005487.1;gene_biotype:protein_coding;transcript_biotype:protein_coding
ENSCSAT00000003059.1	3000	2842.51	763.749	994	cdna;chromosome:ChlSab1.1:11:52587143:52600756:-1;gene:ENSCSAG00000005027.1;gene_biotype:protein_coding;transcript_biotype:protein_coding;gene_symbol:ATP5F1B;description:ATP;synthase;F1;subunit;beta;[Source:NCBI;gene;(formerly;Entrezgene);Acc:103238538]
ENSCSAT00000006068.1	3567	3409.51	749.48	1170	cdna;chromosome:ChlSab1.1:23:82798085:82805936:-1;gene:ENSCSAG00000008017.1;gene_biotype:protein_coding;transcript_biotype:protein_coding;gene_symbol:RACK1;description:receptor;for;activated;C;kinase;1;[Source:NCBI;gene;(formerly;Entrezgene);Acc:103245145]
ENSCSAT00000018223.1	481	323.678	747.735	110.814	cdna;chromosome:ChlSab1.1:X:94909046:94909526:1;gene:ENSCSAG00000000312.1;gene_biotype:protein_coding;transcript_biotype:protein_coding
ENSCSAT00000017774.1	3005	2847.51	747.068	974	cdna;chromosome:ChlSab1.1:20:122884727:122903372:1;gene:ENSCSAG00000000760.1;gene_biotype:protein_coding;transcript_biotype:protein_coding;gene_symbol:ENO1;description:enolase;1;[Source:HGNC;Symbol;Acc:HGNC:3350]
ENSCSAT00000017587.1	762	604.557	744.212	206	cdna;chromosome:ChlSab1.1:20:107858447:107897291:-1;gene:ENSCSAG00000000946.1;gene_biotype:protein_coding;transcript_biotype:protein_coding;gene_symbol:CLIC4;description:chloride;intracellular;channel;4;[Source:HGNC;Symbol;Acc:HGNC:13518]
ENSCSAT00000004095.1	3275	3117.51	741.215	1058	cdna;chromosome:ChlSab1.1:11:45976700:46001457:1;gene:ENSCSAG00000006054.1;gene_biotype:protein_coding;transcript_biotype:protein_coding;gene_symbol:TMBIM6;description:transmembrane;BAX;inhibitor;motif;containing;6;[Source:NCBI;gene;(formerly;Entrezgene);Acc:103238281]
ENSCSAT00000015298.1	804	646.545	734.323	217.38	cdna;chromosome:ChlSab1.1:13:22366881:22367712:1;gene:ENSCSAG00000017207.1;gene_biotype:protein_coding;transcript_biotype:protein_coding;description:60S;ribosomal;protein;L7a-like;[Source:NCBI;gene;(formerly;Entrezgene);Acc:103240161]
ENSCSAT00000010441.1	1429	1271.51	733.654	427.116	cdna;chromosome:ChlSab1.1:23:45943271:45944828:1;gene:ENSCSAG00000012347.1;gene_biotype:protein_coding;transcript_biotype:protein_coding
ENSCSAT00000003836.1	2048	1890.51	722.049	625	cdna;chromosome:ChlSab1.1:11:48379465:48394643:1;gene:ENSCSAG00000005799.1;gene_biotype:protein_coding;transcript_biotype:protein_coding;gene_symbol:KRT7;description:keratin;7;[Source:NCBI;gene;(formerly;Entrezgene);Acc:103238341]
ENSCSAT00000000512.1	1748	1590.51	718.176	523	cdna;chromosome:ChlSab1.1:20:4024775:4032526:1;gene:ENSCSAG00000002493.1;gene_biotype:protein_coding;transcript_biotype:protein_coding;gene_symbol:TAGLN2;description:transgelin;2;[Source:NCBI;gene;(formerly;Entrezgene);Acc:103223743]
ENSCSAT00000016029.1	1400	1242.51	703.114	400	cdna;chromosome:ChlSab1.1:28:12533659:12536570:-1;gene:ENSCSAG00000017932.1;gene_biotype:protein_coding;transcript_biotype:protein_coding;gene_symbol:GNB2;description:G;protein;subunit;beta;2;[Source:NCBI;gene;(formerly;Entrezgene);Acc:103246723]
ENSCSAT00000016794.1	1386	1228.51	702.237	395	cdna;chromosome:ChlSab1.1:6:48000656:48007767:-1;gene:ENSCSAG00000001736.1;gene_biotype:protein_coding;transcript_biotype:protein_coding;gene_symbol:UBE2S;description:ubiquitin;conjugating;enzyme;E2;S;[Source:NCBI;gene;(formerly;Entrezgene);Acc:103235313]
ENSCSAT00000004566.1	1704	1546.51	690.592	489	cdna;chromosome:ChlSab1.1:6:11618396:11623792:1;gene:ENSCSAG00000006527.1;gene_biotype:protein_coding;transcript_biotype:protein_coding;gene_symbol:CALR;description:calreticulin;[Source:NCBI;gene;(formerly;Entrezgene);Acc:103234003]
ENSCSAT00000019009.1	1293	1135.51	689.596	358.526	cdna;chromosome:ChlSab1.1:11:79736531:79737823:-1;gene:ENSCSAG00000018919.1;gene_biotype:protein_coding;transcript_biotype:protein_coding;description:keratin,;type;I;cytoskeletal;18;[Source:NCBI;gene;(formerly;Entrezgene);Acc:103238803]
ENSCSAT00000019537.1	408	250.763	683.785	78.508	cdna;chromosome:ChlSab1.1:14:44719356:44719763:-1;gene:ENSCSAG00000019447.1;gene_biotype:protein_coding;transcript_biotype:protein_coding;description:ribosomal;protein;S17;[Source:NCBI;gene;(formerly;Entrezgene);Acc:103231097]
ENSCSAT00000018532.1	1293	1135.51	680.721	353.912	cdna;chromosome:ChlSab1.1:9:85190432:85191724:1;gene:ENSCSAG00000018442.1;gene_biotype:protein_coding;transcript_biotype:protein_coding
ENSCSAT00000017926.1	276	121.951	680.557	38	cdna;chromosome:ChlSab1.1:1:82546802:82547077:-1;gene:ENSCSAG00000000609.1;gene_biotype:protein_coding;transcript_biotype:protein_coding;description:putative;60S;ribosomal;protein;L37a;[Source:NCBI;gene;(formerly;Entrezgene);Acc:103248222]
ENSCSAT00000000697.1	1211	1053.51	669.547	322.964	cdna;chromosome:ChlSab1.1:16:66963460:66968731:-1;gene:ENSCSAG00000002677.1;gene_biotype:protein_coding;transcript_biotype:protein_coding;description:ribosomal;protein;L19;[Source:NCBI;gene;(formerly;Entrezgene);Acc:103243550]
ENSCSAT00000018286.1	765	607.557	668.64	186	cdna;chromosome:ChlSab1.1:25:30609601:30610365:-1;gene:ENSCSAG00000000249.1;gene_biotype:protein_coding;transcript_biotype:protein_coding;description:phosphoglycerate;mutase;1;[Source:NCBI;gene;(formerly;Entrezgene);Acc:103230363]
ENSCSAT00000004995.1	905	747.527	668.272	228.725	cdna;chromosome:ChlSab1.1:14:104069645:104075647:-1;gene:ENSCSAG00000006946.1;gene_biotype:protein_coding;transcript_biotype:protein_coding;gene_symbol:RPS7;description:ribosomal;protein;S7;[Source:NCBI;gene;(formerly;Entrezgene);Acc:103220913]
ENSCSAT00000016110.1	1486	1328.51	664.174	404	cdna;chromosome:ChlSab1.1:28:12022201:12029181:-1;gene:ENSCSAG00000018013.1;gene_biotype:protein_coding;transcript_biotype:protein_coding;gene_symbol:AP1S1;description:adaptor;related;protein;complex;1;subunit;sigma;1;[Source:HGNC;Symbol;Acc:HGNC:559]
ENSCSAT00000013859.1	2547	2389.51	663.581	726	cdna;chromosome:ChlSab1.1:21:12905280:12914205:1;gene:ENSCSAG00000015764.1;gene_biotype:protein_coding;transcript_biotype:protein_coding;gene_symbol:IGFBP3;description:insulin;like;growth;factor;binding;protein;3;[Source:NCBI;gene;(formerly;Entrezgene);Acc:103226113]
ENSCSAT00000019314.1	357	200.061	655.02	60	cdna;chromosome:ChlSab1.1:11:10042282:10042638:1;gene:ENSCSAG00000019224.1;gene_biotype:protein_coding;transcript_biotype:protein_coding
ENSCSAT00000019168.1	678	520.574	654.499	156	cdna;chromosome:ChlSab1.1:17:44664042:44664719:1;gene:ENSCSAG00000019078.1;gene_biotype:protein_coding;transcript_biotype:protein_coding;gene_symbol:H1-5;description:H1.5;linker;histone,;cluster;member;[Source:NCBI;gene;(formerly;Entrezgene);Acc:103221944]
ENSCSAT00000006529.1	3022	2864.51	650.377	853	cdna;chromosome:ChlSab1.1:9:59440311:59474986:1;gene:ENSCSAG00000008477.1;gene_biotype:protein_coding;transcript_biotype:protein_coding;gene_symbol:PSAP;description:prosaposin;[Source:NCBI;gene;(formerly;Entrezgene);Acc:103216034]
ENSCSAT00000000790.1	2071	1913.51	644.887	565	cdna;chromosome:ChlSab1.1:6:42196538:42199614:1;gene:ENSCSAG00000002775.1;gene_biotype:protein_coding;transcript_biotype:protein_coding;gene_symbol:FTL;description:ferritin;light;chain;[Source:NCBI;gene;(formerly;Entrezgene);Acc:103235006]
ENSCSAT00000015882.1	1119	961.514	635.684	279.853	cdna;chromosome:ChlSab1.1:28:13764945:13825815:-1;gene:ENSCSAG00000017788.1;gene_biotype:protein_coding;transcript_biotype:protein_coding;gene_symbol:ARPC1B;description:actin-related;protein;2/3;complex;subunit;1A;[Source:NCBI;gene;(formerly;Entrezgene);Acc:103246791]
ENSCSAT00000005336.1	863	705.541	631.502	204	cdna;chromosome:ChlSab1.1:19:20379003:20383464:1;gene:ENSCSAG00000007295.1;gene_biotype:protein_coding;transcript_biotype:protein_coding;gene_symbol:LGALS1;description:galectin;1;[Source:NCBI;gene;(formerly;Entrezgene);Acc:103223287]
ENSCSAT00000004190.1	2123	1965.51	626.731	564.014	cdna;chromosome:ChlSab1.1:11:45494919:45503300:1;gene:ENSCSAG00000006152.1;gene_biotype:protein_coding;transcript_biotype:protein_coding;gene_symbol:TUBA1C;description:tubulin;alpha-1C;chain;[Source:NCBI;gene;(formerly;Entrezgene);Acc:103238262]
ENSCSAT00000000429.1	2989	2831.51	624.017	809	cdna;chromosome:ChlSab1.1:1:114446544:114451562:-1;gene:ENSCSAG00000002411.1;gene_biotype:protein_coding;transcript_biotype:protein_coding;gene_symbol:HSPA8;description:heat;shock;protein;family;A;(Hsp70);member;8;[Source:NCBI;gene;(formerly;Entrezgene);Acc:103248693]
ENSCSAT00000015868.1	893	735.538	614.656	207	cdna;chromosome:ChlSab1.1:3:23429044:23433108:-1;gene:ENSCSAG00000017773.1;gene_biotype:protein_coding;transcript_biotype:protein_coding
ENSCSAT00000019167.1	408	250.763	611.592	70.22	cdna;chromosome:ChlSab1.1:17:44659208:44659615:1;gene:ENSCSAG00000019077.1;gene_biotype:protein_coding;transcript_biotype:protein_coding;description:histone;H3.1;[Source:NCBI;gene;(formerly;Entrezgene);Acc:103221946]
ENSCSAT00000019726.1	270	116.525	604.27	32.239	cdna;chromosome:ChlSab1.1:6:40146270:40146539:1;gene:ENSCSAG00000019636.1;gene_biotype:protein_coding;transcript_biotype:protein_coding;description:high;mobility;group;nucleosomal;binding;domain;2;[Source:NCBI;gene;(formerly;Entrezgene);Acc:103225336]
ENSCSAT00000009963.1	3612	3454.51	600.625	950	cdna;chromosome:ChlSab1.1:14:70870839:71067215:-1;gene:ENSCSAG00000011876.1;gene_biotype:protein_coding;transcript_biotype:protein_coding;gene_symbol:CRIM1;description:cysteine;rich;transmembrane;BMP;regulator;1;[Source:NCBI;gene;(formerly;Entrezgene);Acc:103220492]
ENSCSAT00000000028.1	1378	1220.51	594.104	332	cdna;chromosome:ChlSab1.1:MT:10751:12128:1;gene:ENSCSAG00000000028.1;gene_biotype:protein_coding;transcript_biotype:protein_coding;gene_symbol:MT-ND4;description:mitochondrially;encoded;NADH:ubiquinone;oxidoreductase;core;subunit;4;[Source:HGNC;Symbol;Acc:HGNC:7459]
ENSCSAT00000005973.1	6384	6226.51	593.853	1693	cdna;chromosome:ChlSab1.1:19:18986598:19052671:-1;gene:ENSCSAG00000007963.1;gene_biotype:protein_coding;transcript_biotype:protein_coding;gene_symbol:MYH9;description:myosin;heavy;chain;9;[Source:NCBI;gene;(formerly;Entrezgene);Acc:103223246]
ENSCSAT00000008955.1	4097	3939.51	591.546	1067	cdna;chromosome:ChlSab1.1:6:3732425:3742826:-1;gene:ENSCSAG00000010865.1;gene_biotype:protein_coding;transcript_biotype:protein_coding;gene_symbol:EEF2;description:eukaryotic;translation;elongation;factor;2;[Source:NCBI;gene;(formerly;Entrezgene);Acc:103233719]
ENSCSAT00000016946.1	549	391.628	591.151	106	cdna;chromosome:ChlSab1.1:6:50831700:50833979:-1;gene:ENSCSAG00000001585.1;gene_biotype:protein_coding;transcript_biotype:protein_coding;gene_symbol:UBE2M;description:ubiquitin;conjugating;enzyme;E2;M;[Source:NCBI;gene;(formerly;Entrezgene);Acc:103235466]
ENSCSAT00000006875.1	1248	1090.51	586.818	293	cdna;chromosome:ChlSab1.1:17:40158679:40161723:1;gene:ENSCSAG00000008815.1;gene_biotype:protein_coding;transcript_biotype:protein_coding;gene_symbol:NEU1;description:neuraminidase;1;[Source:NCBI;gene;(formerly;Entrezgene);Acc:103221742]
ENSCSAT00000006745.1	902	744.528	586.699	200	cdna;chromosome:ChlSab1.1:17:40286491:40292113:1;gene:ENSCSAG00000008687.1;gene_biotype:protein_coding;transcript_biotype:protein_coding;gene_symbol:CLIC1;description:chloride;intracellular;channel;1;[Source:NCBI;gene;(formerly;Entrezgene);Acc:103221751]
ENSCSAT00000012458.1	2644	2486.51	584.992	666	cdna;chromosome:ChlSab1.1:2:18490485:18513332:1;gene:ENSCSAG00000014364.1;gene_biotype:protein_coding;transcript_biotype:protein_coding;gene_symbol:SDC4;description:syndecan;4;[Source:NCBI;gene;(formerly;Entrezgene);Acc:103245394]
ENSCSAT00000019575.1	1848	1690.51	582.673	451	cdna;chromosome:ChlSab1.1:28:12018800:12020647:1;gene:ENSCSAG00000019485.1;gene_biotype:protein_coding;transcript_biotype:protein_coding;gene_symbol:VGF;description:VGF;nerve;growth;factor;inducible;[Source:NCBI;gene;(formerly;Entrezgene);Acc:103246694]
ENSCSAT00000010100.1	1666	1508.51	576.726	398.339	cdna;chromosome:ChlSab1.1:8:95788305:95819197:-1;gene:ENSCSAG00000012007.1;gene_biotype:protein_coding;transcript_biotype:protein_coding;gene_symbol:YWHAZ;description:tyrosine;3-monooxygenase/tryptophan;5-monooxygenase;activation;protein;zeta;[Source:NCBI;gene;(formerly;Entrezgene);Acc:103237221]
ENSCSAT00000006777.1	594	436.607	575.272	115	cdna;chromosome:ChlSab1.1:2:78562795:78571498:-1;gene:ENSCSAG00000008724.1;gene_biotype:protein_coding;transcript_biotype:protein_coding;gene_symbol:RCAN1;description:regulator;of;calcineurin;1;[Source:NCBI;gene;(formerly;Entrezgene);Acc:103218408]
ENSCSAT00000016456.1	967	809.516	574.673	213	cdna;scaffold:ChlSab1.1:KE148108.1:938752:941359:1;gene:ENSCSAG00000018358.1;gene_biotype:protein_coding;transcript_biotype:protein_coding;gene_symbol:SLC25A5;description:solute;carrier;family;25;member;5;[Source:NCBI;gene;(formerly;Entrezgene);Acc:103247334]
ENSCSAT00000001530.1	1105	947.514	569.349	247	cdna;chromosome:ChlSab1.1:6:36068540:36084778:1;gene:ENSCSAG00000003501.1;gene_biotype:protein_coding;transcript_biotype:protein_coding;gene_symbol:RPS19;description:ribosomal;protein;S19;[Source:HGNC;Symbol;Acc:HGNC:10402]
ENSCSAT00000006604.1	1106	948.514	568.748	247	cdna;chromosome:ChlSab1.1:1:6862540:6865855:1;gene:ENSCSAG00000008548.1;gene_biotype:protein_coding;transcript_biotype:protein_coding;gene_symbol:PPP1CA;description:protein;phosphatase;1;catalytic;subunit;alpha;[Source:NCBI;gene;(formerly;Entrezgene);Acc:103218909]
ENSCSAT00000018138.1	228	81.419	563.326	21	cdna;chromosome:ChlSab1.1:7:63936389:63936616:-1;gene:ENSCSAG00000000397.1;gene_biotype:protein_coding;transcript_biotype:protein_coding
ENSCSAT00000010466.1	2157	1999.51	561.443	514	cdna;chromosome:ChlSab1.1:8:92696195:92772076:1;gene:ENSCSAG00000012372.1;gene_biotype:protein_coding;transcript_biotype:protein_coding;gene_symbol:LAPTM4B;description:lysosomal;protein;transmembrane;4;beta;[Source:HGNC;Symbol;Acc:HGNC:13646]
ENSCSAT00000010150.1	2021	1863.51	560.619	478.336	cdna;chromosome:ChlSab1.1:26:23099992:23145457:1;gene:ENSCSAG00000012062.1;gene_biotype:protein_coding;transcript_biotype:protein_coding
ENSCSAT00000003168.1	849	691.542	559.012	177	cdna;chromosome:ChlSab1.1:7:11617315:11694288:1;gene:ENSCSAG00000005138.1;gene_biotype:protein_coding;transcript_biotype:protein_coding;gene_symbol:IGFBP7;description:insulin;like;growth;factor;binding;protein;7;[Source:HGNC;Symbol;Acc:HGNC:5476]
ENSCSAT00000008971.1	207	66.431	558.912	17	cdna;chromosome:ChlSab1.1:23:54306281:54312102:-1;gene:ENSCSAG00000010885.1;gene_biotype:protein_coding;transcript_biotype:protein_coding
ENSCSAT00000011297.1	951	793.518	533.964	194	cdna;chromosome:ChlSab1.1:26:17045988:17049081:1;gene:ENSCSAG00000013205.1;gene_biotype:protein_coding;transcript_biotype:protein_coding
ENSCSAT00000015847.1	378	220.885	533.943	54	cdna;chromosome:ChlSab1.1:28:14878125:14887870:-1;gene:ENSCSAG00000017754.1;gene_biotype:protein_coding;transcript_biotype:protein_coding;gene_symbol:BRI3;description:brain;protein;I3;[Source:HGNC;Symbol;Acc:HGNC:1109]
ENSCSAT00000011845.1	1085	927.514	531.842	225.858	cdna;chromosome:ChlSab1.1:26:11235629:11248680:1;gene:ENSCSAG00000013747.1;gene_biotype:protein_coding;transcript_biotype:protein_coding
ENSCSAT00000016678.1	879	721.541	529.717	175	cdna;chromosome:ChlSab1.1:20:10267556:10269405:1;gene:ENSCSAG00000001851.1;gene_biotype:protein_coding;transcript_biotype:protein_coding;gene_symbol:S100A6;description:S100;calcium;binding;protein;A6;[Source:NCBI;gene;(formerly;Entrezgene);Acc:103223964]
ENSCSAT00000007567.1	496	338.665	527.914	81.859	cdna;chromosome:ChlSab1.1:22:48811401:48816882:-1;gene:ENSCSAG00000009485.1;gene_biotype:protein_coding;transcript_biotype:protein_coding;description:60S;ribosomal;protein;L32;[Source:NCBI;gene;(formerly;Entrezgene);Acc:103222559]
ENSCSAT00000006867.1	638	480.587	527.172	116	cdna;chromosome:ChlSab1.1:17:40183297:40187717:-1;gene:ENSCSAG00000008807.1;gene_biotype:protein_coding;transcript_biotype:protein_coding
ENSCSAT00000004933.1	468	310.686	520.208	74	cdna;chromosome:ChlSab1.1:1:10269021:10271175:-1;gene:ENSCSAG00000006887.1;gene_biotype:protein_coding;transcript_biotype:protein_coding;gene_symbol:COX8A;description:cytochrome;c;oxidase;subunit;8A;[Source:HGNC;Symbol;Acc:HGNC:2294]
ENSCSAT00000018372.1	252	100.772	520.163	24	cdna;chromosome:ChlSab1.1:20:24527223:24527474:-1;gene:ENSCSAG00000000163.1;gene_biotype:protein_coding;transcript_biotype:protein_coding
ENSCSAT00000018321.1	390	232.825	518.75	55.299	cdna;scaffold:ChlSab1.1:KE148049.1:390550:390939:-1;gene:ENSCSAG00000000214.1;gene_biotype:protein_coding;transcript_biotype:protein_coding;gene_symbol:H2AC21;description:histone;cluster;2;H2A;family;member;b;[Source:NCBI;gene;(formerly;Entrezgene);Acc:103247169]
ENSCSAT00000016537.1	2548	2390.51	517.121	566	cdna;chromosome:ChlSab1.1:6:44990367:45026227:1;gene:ENSCSAG00000001991.1;gene_biotype:protein_coding;transcript_biotype:protein_coding;gene_symbol:PPP2R1A;description:protein;phosphatase;2;scaffold;subunit;Aalpha;[Source:NCBI;gene;(formerly;Entrezgene);Acc:103235167]
ENSCSAT00000018386.1	1005	847.514	512.83	199	cdna;chromosome:ChlSab1.1:20:74205542:74206546:1;gene:ENSCSAG00000000149.1;gene_biotype:protein_coding;transcript_biotype:protein_coding;gene_symbol:JUN;description:Jun;proto-oncogene,;AP-1;transcription;factor;subunit;[Source:NCBI;gene;(formerly;Entrezgene);Acc:103224726]
ENSCSAT00000008902.1	4752	4594.51	507.69	1068	cdna;chromosome:ChlSab1.1:15:56003236:56022123:1;gene:ENSCSAG00000010810.1;gene_biotype:protein_coding;transcript_biotype:protein_coding;gene_symbol:AMOTL2;description:angiomotin;like;2;[Source:NCBI;gene;(formerly;Entrezgene);Acc:103241641]
ENSCSAT00000016168.1	2358	2200.51	498.249	502	cdna;scaffold:ChlSab1.1:KE147549.1:99135:105656:-1;gene:ENSCSAG00000018069.1;gene_biotype:protein_coding;transcript_biotype:protein_coding;gene_symbol:SLC25A6;description:solute;carrier;family;25;member;6;[Source:NCBI;gene;(formerly;Entrezgene);Acc:103247519]
ENSCSAT00000003503.1	940	782.518	496.813	178	cdna;chromosome:ChlSab1.1:11:49768783:49780081:-1;gene:ENSCSAG00000005468.1;gene_biotype:protein_coding;transcript_biotype:protein_coding;gene_symbol:ATP5MC2;description:ATP;synthase;membrane;subunit;c;locus;2;[Source:NCBI;gene;(formerly;Entrezgene);Acc:103238407]
ENSCSAT00000004191.1	2321	2163.51	495.72	491.054	cdna;chromosome:ChlSab1.1:11:45418748:45423685:-1;gene:ENSCSAG00000006153.1;gene_biotype:protein_coding;transcript_biotype:protein_coding;gene_symbol:TUBA1A;description:tubulin;alpha;1a;[Source:NCBI;gene;(formerly;Entrezgene);Acc:103238261]
ENSCSAT00000001282.1	2454	2296.51	495.491	521	cdna;chromosome:ChlSab1.1:6:38288537:38301634:1;gene:ENSCSAG00000003255.1;gene_biotype:protein_coding;transcript_biotype:protein_coding;gene_symbol:BCAM;description:basal;cell;adhesion;molecule;(Lutheran;blood;group);[Source:NCBI;gene;(formerly;Entrezgene);Acc:103234838]
ENSCSAT00000003647.1	5424	5266.51	494.333	1192	cdna;chromosome:ChlSab1.1:9:93380914:93398912:1;gene:ENSCSAG00000005611.1;gene_biotype:protein_coding;transcript_biotype:protein_coding;gene_symbol:SCD;description:stearoyl-CoA;desaturase;[Source:NCBI;gene;(formerly;Entrezgene);Acc:103216387]
ENSCSAT00000019107.1	480	322.678	494.106	73	cdna;chromosome:ChlSab1.1:16:59453767:59454246:-1;gene:ENSCSAG00000019017.1;gene_biotype:protein_coding;transcript_biotype:protein_coding;description:ribosomal;protein;L21;[Source:NCBI;gene;(formerly;Entrezgene);Acc:103249052]
ENSCSAT00000019691.1	552	394.626	491.599	88.824	cdna;chromosome:ChlSab1.1:21:19024469:19025020:-1;gene:ENSCSAG00000019601.1;gene_biotype:protein_coding;transcript_biotype:protein_coding
ENSCSAT00000015808.1	888	730.541	490.305	164	cdna;chromosome:ChlSab1.1:28:15583516:15610328:1;gene:ENSCSAG00000017712.1;gene_biotype:protein_coding;transcript_biotype:protein_coding;description:Rac;family;small;GTPase;1;[Source:NCBI;gene;(formerly;Entrezgene);Acc:103246815]
ENSCSAT00000000117.1	2800	2642.51	485.989	588	cdna;chromosome:ChlSab1.1:20:7723477:7748780:-1;gene:ENSCSAG00000002099.1;gene_biotype:protein_coding;transcript_biotype:protein_coding;gene_symbol:LMNA;description:lamin;A/C;[Source:NCBI;gene;(formerly;Entrezgene);Acc:103223838]
ENSCSAT00000019531.1	1068	910.514	484.542	202	cdna;chromosome:ChlSab1.1:14:37013880:37014947:-1;gene:ENSCSAG00000019441.1;gene_biotype:protein_coding;transcript_biotype:protein_coding;gene_symbol:PCBP1;description:poly(rC);binding;protein;1;[Source:NCBI;gene;(formerly;Entrezgene);Acc:103220098]
ENSCSAT00000000022.1	681	523.574	483.89	116	cdna;chromosome:ChlSab1.1:MT:8524:9204:1;gene:ENSCSAG00000000022.1;gene_biotype:protein_coding;transcript_biotype:protein_coding;gene_symbol:ATP6;description:ATP;synthase;F0;subunit;6;[Source:NCBI;gene;(formerly;Entrezgene);Acc:4097493]
ENSCSAT00000003239.1	3150	2992.51	483.157	662	cdna;chromosome:ChlSab1.1:16:43250435:43281670:-1;gene:ENSCSAG00000005208.1;gene_biotype:protein_coding;transcript_biotype:protein_coding;gene_symbol:ITGA3;description:integrin;subunit;alpha;3;[Source:NCBI;gene;(formerly;Entrezgene);Acc:103242953]
ENSCSAT00000001942.1	2356	2198.51	480.82	484	cdna;chromosome:ChlSab1.1:1:66788240:66799072:1;gene:ENSCSAG00000003909.1;gene_biotype:protein_coding;transcript_biotype:protein_coding;gene_symbol:SERPINH1;description:serpin;family;H;member;1;[Source:NCBI;gene;(formerly;Entrezgene);Acc:103248063]
ENSCSAT00000007227.1	1158	1000.51	480.249	220	cdna;chromosome:ChlSab1.1:8:137265535:137269404:1;gene:ENSCSAG00000009159.1;gene_biotype:protein_coding;transcript_biotype:protein_coding;description:lymphocyte;antigen;6;family;member;E;[Source:NCBI;gene;(formerly;Entrezgene);Acc:103237552]
ENSCSAT00000001248.1	1132	974.514	479.615	214	cdna;chromosome:ChlSab1.1:1:93889198:93899587:-1;gene:ENSCSAG00000003219.1;gene_biotype:protein_coding;transcript_biotype:protein_coding;gene_symbol:MMP7;description:matrix;metallopeptidase;7;[Source:NCBI;gene;(formerly;Entrezgene);Acc:103248342]
ENSCSAT00000011953.1	886	728.541	477.831	159.39	cdna;chromosome:ChlSab1.1:2:25153702:25155179:1;gene:ENSCSAG00000013863.1;gene_biotype:protein_coding;transcript_biotype:protein_coding
ENSCSAT00000008926.1	1408	1250.51	476.805	273	cdna;chromosome:ChlSab1.1:2:54063999:54073367:1;gene:ENSCSAG00000010840.1;gene_biotype:protein_coding;transcript_biotype:protein_coding;gene_symbol:SNRPB;description:small;nuclear;ribonucleoprotein;polypeptides;B;and;B1;[Source:NCBI;gene;(formerly;Entrezgene);Acc:103215680]
ENSCSAT00000007502.1	978	820.515	476.467	179	cdna;chromosome:ChlSab1.1:9:51319166:51347968:-1;gene:ENSCSAG00000009464.1;gene_biotype:protein_coding;transcript_biotype:protein_coding;gene_symbol:TSPAN14;description:tetraspanin;14;[Source:NCBI;gene;(formerly;Entrezgene);Acc:103215914]
ENSCSAT00000017994.1	507	349.652	474.727	76	cdna;chromosome:ChlSab1.1:16:44586099:44586605:1;gene:ENSCSAG00000000541.1;gene_biotype:protein_coding;transcript_biotype:protein_coding
ENSCSAT00000001579.1	1825	1667.51	474.139	362	cdna;chromosome:ChlSab1.1:16:62069127:62074579:1;gene:ENSCSAG00000003554.1;gene_biotype:protein_coding;transcript_biotype:protein_coding;gene_symbol:SLC25A39;description:solute;carrier;family;25;member;39;[Source:NCBI;gene;(formerly;Entrezgene);Acc:103243325]
ENSCSAT00000018156.1	588	430.61	466.628	92	cdna;chromosome:ChlSab1.1:14:87249005:87249592:-1;gene:ENSCSAG00000000379.1;gene_biotype:protein_coding;transcript_biotype:protein_coding;gene_symbol:RHOB;description:ras;homolog;family;member;B;[Source:NCBI;gene;(formerly;Entrezgene);Acc:103220717]
ENSCSAT00000000380.1	3697	3539.51	465.876	755	cdna;chromosome:ChlSab1.1:16:70819139:70850471:-1;gene:ENSCSAG00000002364.1;gene_biotype:protein_coding;transcript_biotype:protein_coding;gene_symbol:TIMP2;description:TIMP;metallopeptidase;inhibitor;2;[Source:NCBI;gene;(formerly;Entrezgene);Acc:103243669]
ENSCSAT00000011143.1	2155	1997.51	460.319	421	cdna;chromosome:ChlSab1.1:22:14620287:14650655:-1;gene:ENSCSAG00000013045.1;gene_biotype:protein_coding;transcript_biotype:protein_coding;gene_symbol:TKT;description:transketolase;[Source:NCBI;gene;(formerly;Entrezgene);Acc:103227756]
ENSCSAT00000001148.1	4580	4422.51	460.271	932	cdna;chromosome:ChlSab1.1:5:73229951:73269754:-1;gene:ENSCSAG00000003120.1;gene_biotype:protein_coding;transcript_biotype:protein_coding;gene_symbol:SLC7A5;description:solute;carrier;family;7;member;5;[Source:NCBI;gene;(formerly;Entrezgene);Acc:103233435]
ENSCSAT00000010706.1	1428	1270.51	458.985	267	cdna;chromosome:ChlSab1.1:21:56170450:56393808:1;gene:ENSCSAG00000012617.1;gene_biotype:protein_coding;transcript_biotype:protein_coding;gene_symbol:CDK6;description:cyclin;dependent;kinase;6;[Source:NCBI;gene;(formerly;Entrezgene);Acc:103226555]
ENSCSAT00000003679.1	762	604.557	458.81	127	cdna;chromosome:ChlSab1.1:16:35392873:35394982:1;gene:ENSCSAG00000005642.1;gene_biotype:protein_coding;transcript_biotype:protein_coding;gene_symbol:SRSF1;description:serine;and;arginine;rich;splicing;factor;1;[Source:HGNC;Symbol;Acc:HGNC:10780]
ENSCSAT00000003346.1	1506	1348.51	458.262	282.945	cdna;chromosome:ChlSab1.1:11:51672740:51676301:-1;gene:ENSCSAG00000005315.1;gene_biotype:protein_coding;transcript_biotype:protein_coding;gene_symbol:CD63;description:CD63;molecule;[Source:NCBI;gene;(formerly;Entrezgene);Acc:103238483]
ENSCSAT00000019180.1	663	505.574	453.598	105	cdna;chromosome:ChlSab1.1:17:46016693:46017355:1;gene:ENSCSAG00000019090.1;gene_biotype:protein_coding;transcript_biotype:protein_coding;gene_symbol:H1-3;description:H1.3;linker;histone,;cluster;member;[Source:NCBI;gene;(formerly;Entrezgene);Acc:103222006]
ENSCSAT00000008001.1	2175	2017.51	453.591	419	cdna;chromosome:ChlSab1.1:9:44330400:44346959:1;gene:ENSCSAG00000009920.1;gene_biotype:protein_coding;transcript_biotype:protein_coding;description:annexin;A8-like;1;[Source:NCBI;gene;(formerly;Entrezgene);Acc:103215865]
ENSCSAT00000016376.1	882	724.541	449.799	149.216	cdna;scaffold:ChlSab1.1:KE148109.1:603744:604629:-1;gene:ENSCSAG00000018278.1;gene_biotype:pseudogene;transcript_biotype:pseudogene
ENSCSAT00000010446.1	1037	879.514	448.863	180.755	cdna;chromosome:ChlSab1.1:8:92957814:92962242:-1;gene:ENSCSAG00000012353.1;gene_biotype:protein_coding;transcript_biotype:protein_coding;gene_symbol:RPL30;description:ribosomal;protein;L30;[Source:NCBI;gene;(formerly;Entrezgene);Acc:103237185]
ENSCSAT00000008605.1	371	213.936	447.882	43.871	cdna;chromosome:ChlSab1.1:1:646748:649029:-1;gene:ENSCSAG00000010528.1;gene_biotype:protein_coding;transcript_biotype:protein_coding;gene_symbol:POLR2L;description:RNA;polymerase;II,;I;and;III;subunit;L;[Source:NCBI;gene;(formerly;Entrezgene);Acc:103234512]
ENSCSAT00000018228.1	204	64.417	440.766	13	cdna;chromosome:ChlSab1.1:X:98187540:98187743:-1;gene:ENSCSAG00000000307.1;gene_biotype:protein_coding;transcript_biotype:protein_coding
ENSCSAT00000006918.1	15070	14912.5	439.962	3004	cdna;chromosome:ChlSab1.1:8:138125280:138149364:-1;gene:ENSCSAG00000008854.1;gene_biotype:protein_coding;transcript_biotype:protein_coding;gene_symbol:PLEC;description:plectin;[Source:HGNC;Symbol;Acc:HGNC:9069]
ENSCSAT00000013695.1	386	228.843	439.022	46	cdna;chromosome:ChlSab1.1:2:5109941:5113566:1;gene:ENSCSAG00000015600.1;gene_biotype:protein_coding;transcript_biotype:protein_coding;gene_symbol:ATP5F1E;description:ATP;synthase;F1;subunit;epsilon;[Source:NCBI;gene;(formerly;Entrezgene);Acc:103243426]
ENSCSAT00000010347.1	593	435.609	436.204	87	cdna;chromosome:ChlSab1.1:6:1010265:1013002:1;gene:ENSCSAG00000012269.1;gene_biotype:protein_coding;transcript_biotype:protein_coding;gene_symbol:ATP5F1D;description:ATP;synthase;F1;subunit;delta;[Source:NCBI;gene;(formerly;Entrezgene);Acc:103233597]
ENSCSAT00000010893.1	903	745.527	435.636	148.703	cdna;chromosome:ChlSab1.1:16:4843438:4850600:-1;gene:ENSCSAG00000012802.1;gene_biotype:protein_coding;transcript_biotype:protein_coding;gene_symbol:C1QBP;description:complement;C1q;binding;protein;[Source:NCBI;gene;(formerly;Entrezgene);Acc:103242231]
ENSCSAT00000000032.1	1809	1651.51	435.091	329	cdna;chromosome:ChlSab1.1:MT:12328:14136:1;gene:ENSCSAG00000000032.1;gene_biotype:protein_coding;transcript_biotype:protein_coding;gene_symbol:ND5;description:NADH;dehydrogenase;subunit;5;[Source:NCBI;gene;(formerly;Entrezgene);Acc:4097498]
ENSCSAT00000008680.1	743	585.566	428.932	115	cdna;chromosome:ChlSab1.1:2:55170873:55194535:1;gene:ENSCSAG00000010606.1;gene_biotype:protein_coding;transcript_biotype:protein_coding
ENSCSAT00000009993.1	625	467.594	425.049	91	cdna;chromosome:ChlSab1.1:16:6614688:6616443:-1;gene:ENSCSAG00000011904.1;gene_biotype:protein_coding;transcript_biotype:protein_coding;gene_symbol:GABARAP;description:GABA;type;A;receptor-associated;protein;[Source:NCBI;gene;(formerly;Entrezgene);Acc:103242281]
ENSCSAT00000011775.1	2449	2291.51	424.135	445	cdna;chromosome:ChlSab1.1:2:26503597:26564142:-1;gene:ENSCSAG00000013681.1;gene_biotype:protein_coding;transcript_biotype:protein_coding;gene_symbol:RPN2;description:ribophorin;II;[Source:NCBI;gene;(formerly;Entrezgene);Acc:103246432]
ENSCSAT00000018638.1	690	532.574	423.978	103.385	cdna;chromosome:ChlSab1.1:8:53292182:53292871:1;gene:ENSCSAG00000018548.1;gene_biotype:protein_coding;transcript_biotype:protein_coding;description:coiled-coil-helix-coiled-coil-helix;domain-containing;protein;2,;mitochondrial;[Source:NCBI;gene;(formerly;Entrezgene);Acc:103236836]
ENSCSAT00000009623.1	2186	2028.51	422.061	392	cdna;chromosome:ChlSab1.1:23:53044994:53050194:-1;gene:ENSCSAG00000011534.1;gene_biotype:protein_coding;transcript_biotype:protein_coding;gene_symbol:RPS14;description:ribosomal;protein;S14;[Source:NCBI;gene;(formerly;Entrezgene);Acc:103244796]
ENSCSAT00000008579.1	1316	1158.51	416.637	221	cdna;chromosome:ChlSab1.1:5:2387812:2394180:1;gene:ENSCSAG00000010494.1;gene_biotype:protein_coding;transcript_biotype:protein_coding;gene_symbol:ATP6V0C;description:ATPase;H+;transporting;V0;subunit;c;[Source:NCBI;gene;(formerly;Entrezgene);Acc:103226843]
ENSCSAT00000002885.1	1313	1138.51	416.283	217	cdna;chromosome:ChlSab1.1:16:45902980:45904929:1;gene:ENSCSAG00000004855.1;gene_biotype:protein_coding;transcript_biotype:protein_coding;gene_symbol:H3-5;description:H3;histone,;family;3B;[Source:NCBI;gene;(formerly;Entrezgene);Acc:103243033]
ENSCSAT00000008896.1	954	796.518	409.18	149.225	cdna;chromosome:ChlSab1.1:X:65774252:65775206:1;gene:ENSCSAG00000010819.1;gene_biotype:pseudogene;transcript_biotype:pseudogene
ENSCSAT00000010875.1	1626	1468.51	406.024	273	cdna;chromosome:ChlSab1.1:6:425106:436431:1;gene:ENSCSAG00000012782.1;gene_biotype:protein_coding;transcript_biotype:protein_coding;gene_symbol:FSTL3;description:follistatin;like;3;[Source:NCBI;gene;(formerly;Entrezgene);Acc:103233581]
ENSCSAT00000016792.1	4063	3905.51	405.44	725	cdna;chromosome:ChlSab1.1:6:47987663:47993276:1;gene:ENSCSAG00000001738.1;gene_biotype:protein_coding;transcript_biotype:protein_coding;description:ribosomal;protein;L28;[Source:NCBI;gene;(formerly;Entrezgene);Acc:103235312]
ENSCSAT00000018365.1	402	244.781	404.732	45.361	cdna;chromosome:ChlSab1.1:20:22116685:22117086:-1;gene:ENSCSAG00000000170.1;gene_biotype:protein_coding;transcript_biotype:protein_coding
ENSCSAT00000016940.1	3969	3811.51	399.394	697	cdna;chromosome:ChlSab1.1:6:50819833:50827010:1;gene:ENSCSAG00000001590.1;gene_biotype:protein_coding;transcript_biotype:protein_coding;gene_symbol:TRIM28;description:tripartite;motif;containing;28;[Source:NCBI;gene;(formerly;Entrezgene);Acc:103235461]
ENSCSAT00000004351.1	1943	1785.51	398.769	326	cdna;chromosome:ChlSab1.1:5:26221337:26225083:1;gene:ENSCSAG00000006314.1;gene_biotype:protein_coding;transcript_biotype:protein_coding;gene_symbol:TUFM;description:Tu;translation;elongation;factor,;mitochondrial;[Source:NCBI;gene;(formerly;Entrezgene);Acc:103230326]
ENSCSAT00000012597.1	546	388.632	396.946	70.632	cdna;chromosome:ChlSab1.1:2:18069718:18073482:-1;gene:ENSCSAG00000014521.1;gene_biotype:protein_coding;transcript_biotype:protein_coding
ENSCSAT00000000010.1	1042	884.514	395.077	160	cdna;chromosome:ChlSab1.1:MT:4465:5506:1;gene:ENSCSAG00000000010.1;gene_biotype:protein_coding;transcript_biotype:protein_coding;gene_symbol:MT-ND2;description:mitochondrially;encoded;NADH:ubiquinone;oxidoreductase;core;subunit;2;[Source:HGNC;Symbol;Acc:HGNC:7456]
ENSCSAT00000000465.1	904	746.527	392.036	134	cdna;chromosome:ChlSab1.1:16:69806923:69816754:-1;gene:ENSCSAG00000002455.1;gene_biotype:protein_coding;transcript_biotype:protein_coding;description:prohibitin;[Source:NCBI;gene;(formerly;Entrezgene);Acc:103243640]
ENSCSAT00000006748.1	2834	2676.51	391.368	479.61	cdna;chromosome:ChlSab1.1:1:6675376:6713580:-1;gene:ENSCSAG00000008684.1;gene_biotype:protein_coding;transcript_biotype:protein_coding;gene_symbol:GSTP1;description:glutathione;S-transferase;pi;1;[Source:HGNC;Symbol;Acc:HGNC:4638]
ENSCSAT00000017270.1	1068	910.514	390.992	163	cdna;chromosome:ChlSab1.1:20:81692256:81693325:-1;gene:ENSCSAG00000001263.1;gene_biotype:pseudogene;transcript_biotype:pseudogene
ENSCSAT00000001443.1	2275	2117.51	390.913	379	cdna;chromosome:ChlSab1.1:5:67464334:67529182:1;gene:ENSCSAG00000003413.1;gene_biotype:protein_coding;transcript_biotype:protein_coding;gene_symbol:HSD17B2;description:hydroxysteroid;17-beta;dehydrogenase;2;[Source:NCBI;gene;(formerly;Entrezgene);Acc:103233373]
ENSCSAT00000006141.1	687	529.574	387.675	94	cdna;chromosome:ChlSab1.1:1:8253884:8255572:-1;gene:ENSCSAG00000008086.1;gene_biotype:protein_coding;transcript_biotype:protein_coding;gene_symbol:BANF1;description:BAF;nuclear;assembly;factor;1;[Source:NCBI;gene;(formerly;Entrezgene);Acc:103225152]
ENSCSAT00000013472.1	1717	1559.51	386.533	276	cdna;chromosome:ChlSab1.1:14:33921247:33939404:-1;gene:ENSCSAG00000015413.1;gene_biotype:protein_coding;transcript_biotype:protein_coding;gene_symbol:CCT7;description:chaperonin;containing;TCP1;subunit;7;[Source:HGNC;Symbol;Acc:HGNC:1622]
ENSCSAT00000005049.1	1633	1475.51	384.855	260	cdna;chromosome:ChlSab1.1:1:9989030:9992088:1;gene:ENSCSAG00000007003.1;gene_biotype:protein_coding;transcript_biotype:protein_coding;gene_symbol:PPP1R14B;description:protein;phosphatase;1;regulatory;inhibitor;subunit;14B;[Source:HGNC;Symbol;Acc:HGNC:9057]
ENSCSAT00000005233.1	378	220.885	383.834	38.819	cdna;chromosome:ChlSab1.1:1:9917957:9918617:1;gene:ENSCSAG00000007187.1;gene_biotype:protein_coding;transcript_biotype:protein_coding;gene_symbol:TRMT112;description:tRNA;methyltransferase;subunit;11-2;[Source:HGNC;Symbol;Acc:HGNC:26940]
ENSCSAT00000019742.1	969	811.516	382.171	142	cdna;chromosome:ChlSab1.1:6:46566968:46567936:1;gene:ENSCSAG00000019652.1;gene_biotype:protein_coding;transcript_biotype:protein_coding;gene_symbol:MYADM;description:myeloid;associated;differentiation;marker;[Source:NCBI;gene;(formerly;Entrezgene);Acc:103235231]
ENSCSAT00000011365.1	864	706.541	382.066	123.597	cdna;chromosome:ChlSab1.1:9:12401811:12402675:-1;gene:ENSCSAG00000013273.1;gene_biotype:pseudogene;transcript_biotype:pseudogene
ENSCSAT00000018263.1	381	223.869	381.932	39.148	cdna;chromosome:ChlSab1.1:25:1278820:1279200:-1;gene:ENSCSAG00000000272.1;gene_biotype:protein_coding;transcript_biotype:protein_coding;gene_symbol:H2BU1;description:histone;cluster;3,;H2bb;[Source:NCBI;gene;(formerly;Entrezgene);Acc:103229949]
ENSCSAT00000018986.1	603	445.595	381.831	77.901	cdna;chromosome:ChlSab1.1:15:31157171:31157773:1;gene:ENSCSAG00000018896.1;gene_biotype:protein_coding;transcript_biotype:protein_coding;description:ribosomal;protein;L17;[Source:NCBI;gene;(formerly;Entrezgene);Acc:103222439]
ENSCSAT00000002621.1	3057	2899.51	378.134	502	cdna;chromosome:ChlSab1.1:1:54017696:54028843:1;gene:ENSCSAG00000004613.1;gene_biotype:protein_coding;transcript_biotype:protein_coding;gene_symbol:EIF4G2;description:eukaryotic;translation;initiation;factor;4;gamma;2;[Source:HGNC;Symbol;Acc:HGNC:3297]
ENSCSAT00000008835.1	1259	1101.51	368.799	186	cdna;chromosome:ChlSab1.1:11:6236494:6275909:1;gene:ENSCSAG00000010749.1;gene_biotype:protein_coding;transcript_biotype:protein_coding;gene_symbol:CD9;description:CD9;molecule;[Source:NCBI;gene;(formerly;Entrezgene);Acc:103218443]
ENSCSAT00000014587.1	2103	1945.51	362.606	323	cdna;chromosome:ChlSab1.1:12:1074811:1079550:1;gene:ENSCSAG00000016487.1;gene_biotype:protein_coding;transcript_biotype:protein_coding;gene_symbol:DPP7;description:dipeptidyl;peptidase;7;[Source:NCBI;gene;(formerly;Entrezgene);Acc:103239581]
ENSCSAT00000005255.1	1260	1102.51	360.541	182	cdna;chromosome:ChlSab1.1:21:112266979:112274266:1;gene:ENSCSAG00000007214.1;gene_biotype:protein_coding;transcript_biotype:protein_coding;gene_symbol:ZYX;description:zyxin;[Source:HGNC;Symbol;Acc:HGNC:13200]
ENSCSAT00000009116.1	3261	3103.51	357.501	508	cdna;chromosome:ChlSab1.1:2:52832181:52838865:-1;gene:ENSCSAG00000011027.1;gene_biotype:protein_coding;transcript_biotype:protein_coding;gene_symbol:CST3;description:cystatin;C;[Source:NCBI;gene;(formerly;Entrezgene);Acc:103215462]
ENSCSAT00000006780.1	976	818.515	354.888	133	cdna;chromosome:ChlSab1.1:12:75415478:75423372:1;gene:ENSCSAG00000008711.1;gene_biotype:protein_coding;transcript_biotype:protein_coding
ENSCSAT00000019007.1	930	772.518	353.401	125	cdna;chromosome:ChlSab1.1:11:78042175:78043104:1;gene:ENSCSAG00000018917.1;gene_biotype:protein_coding;transcript_biotype:protein_coding;description:calponin-2;[Source:NCBI;gene;(formerly;Entrezgene);Acc:103238799]
ENSCSAT00000008834.1	1336	1178.51	351.935	189.903	cdna;chromosome:ChlSab1.1:X:67072007:67092692:1;gene:ENSCSAG00000010747.1;gene_biotype:protein_coding;transcript_biotype:protein_coding
ENSCSAT00000012056.1	2945	2787.51	351.8	449	cdna;chromosome:ChlSab1.1:21:35037001:35066171:-1;gene:ENSCSAG00000013965.1;gene_biotype:protein_coding;transcript_biotype:protein_coding;gene_symbol:GPNMB;description:glycoprotein;nmb;[Source:NCBI;gene;(formerly;Entrezgene);Acc:103226379]
ENSCSAT00000002278.1	1530	1372.51	351.676	221	cdna;chromosome:ChlSab1.1:6:31050494:31061421:1;gene:ENSCSAG00000004247.1;gene_biotype:protein_coding;transcript_biotype:protein_coding;gene_symbol:CAPNS1;description:calpain;small;subunit;1;[Source:NCBI;gene;(formerly;Entrezgene);Acc:103234558]
ENSCSAT00000004405.1	881	723.541	350.156	116	cdna;chromosome:ChlSab1.1:16:26468419:26481025:1;gene:ENSCSAG00000006365.1;gene_biotype:protein_coding;transcript_biotype:protein_coding;gene_symbol:TMEM98;description:transmembrane;protein;98;[Source:NCBI;gene;(formerly;Entrezgene);Acc:103242703]
ENSCSAT00000001582.1	5525	5367.51	349.532	859	cdna;chromosome:ChlSab1.1:6:35537773:35580716:1;gene:ENSCSAG00000003552.1;gene_biotype:protein_coding;transcript_biotype:protein_coding;gene_symbol:AXL;description:AXL;receptor;tyrosine;kinase;[Source:HGNC;Symbol;Acc:HGNC:905]
ENSCSAT00000000021.1	201	62.513	349.377	10	cdna;chromosome:ChlSab1.1:MT:8363:8563:1;gene:ENSCSAG00000000021.1;gene_biotype:protein_coding;transcript_biotype:protein_coding
ENSCSAT00000011753.1	408	250.763	346.476	39.78	cdna;chromosome:ChlSab1.1:25:30838336:30838758:-1;gene:ENSCSAG00000013661.1;gene_biotype:protein_coding;transcript_biotype:protein_coding
ENSCSAT00000005694.1	372	214.928	345.504	34	cdna;chromosome:ChlSab1.1:6:8899970:8902459:1;gene:ENSCSAG00000007645.1;gene_biotype:protein_coding;transcript_biotype:protein_coding;gene_symbol:UBL5;description:ubiquitin;like;5;[Source:NCBI;gene;(formerly;Entrezgene);Acc:103233875]
ENSCSAT00000001246.1	3770	3612.51	341.59	565	cdna;chromosome:ChlSab1.1:16:63840859:63863296:1;gene:ENSCSAG00000003217.1;gene_biotype:protein_coding;transcript_biotype:protein_coding;gene_symbol:CAVIN1;description:caveolae;associated;protein;1;[Source:NCBI;gene;(formerly;Entrezgene);Acc:103243407]
ENSCSAT00000018379.1	426	268.73	341.351	42	cdna;chromosome:ChlSab1.1:20:40622769:40623194:-1;gene:ENSCSAG00000000156.1;gene_biotype:protein_coding;transcript_biotype:protein_coding
ENSCSAT00000001277.1	1720	1562.51	341.062	244	cdna;chromosome:ChlSab1.1:6:38376887:38381438:1;gene:ENSCSAG00000003246.1;gene_biotype:protein_coding;transcript_biotype:protein_coding;gene_symbol:APOE;description:apolipoprotein;E;[Source:NCBI;gene;(formerly;Entrezgene);Acc:103234841]
ENSCSAT00000014245.1	3524	3366.51	340.601	525	cdna;chromosome:ChlSab1.1:4:54629194:54636032:-1;gene:ENSCSAG00000016152.1;gene_biotype:protein_coding;transcript_biotype:protein_coding;gene_symbol:PLK2;description:polo;like;kinase;2;[Source:NCBI;gene;(formerly;Entrezgene);Acc:103221820]
ENSCSAT00000005263.1	982	824.515	339.055	127.998	cdna;chromosome:ChlSab1.1:14:97178974:97181910:1;gene:ENSCSAG00000007220.1;gene_biotype:protein_coding;transcript_biotype:protein_coding
ENSCSAT00000013827.1	772	614.557	337.62	95	cdna;chromosome:ChlSab1.1:2:2094455:2100936:1;gene:ENSCSAG00000015753.1;gene_biotype:protein_coding;transcript_biotype:protein_coding;gene_symbol:PSMA7;description:proteasome;20S;subunit;alpha;7;[Source:NCBI;gene;(formerly;Entrezgene);Acc:103243135]
ENSCSAT00000014238.1	550	392.627	337.186	60.615	cdna;chromosome:ChlSab1.1:21:2675517:2679262:1;gene:ENSCSAG00000016147.1;gene_biotype:protein_coding;transcript_biotype:protein_coding
ENSCSAT00000000238.1	3068	2910.51	336.933	449	cdna;chromosome:ChlSab1.1:16:73718656:73733892:-1;gene:ENSCSAG00000002220.1;gene_biotype:protein_coding;transcript_biotype:protein_coding;gene_symbol:P4HB;description:prolyl;4-hydroxylase;subunit;beta;[Source:NCBI;gene;(formerly;Entrezgene);Acc:103243733]
ENSCSAT00000016239.1	2334	2176.51	336.163	335	cdna;chromosome:ChlSab1.1:28:10294021:10313970:1;gene:ENSCSAG00000018142.1;gene_biotype:protein_coding;transcript_biotype:protein_coding;gene_symbol:MDH2;description:malate;dehydrogenase;2;[Source:NCBI;gene;(formerly;Entrezgene);Acc:103246656]
ENSCSAT00000006002.1	1326	1168.51	335.665	179.586	cdna;chromosome:ChlSab1.1:5:17082137:17100780:-1;gene:ENSCSAG00000007955.1;gene_biotype:protein_coding;transcript_biotype:protein_coding;description:40S;ribosomal;protein;S15a;[Source:NCBI;gene;(formerly;Entrezgene);Acc:103228971]
ENSCSAT00000015601.1	1416	1258.51	333.733	192.305	cdna;chromosome:ChlSab1.1:18:70870566:70888099:1;gene:ENSCSAG00000017507.1;gene_biotype:protein_coding;transcript_biotype:protein_coding;gene_symbol:TUBB6;description:tubulin;beta;6;class;V;[Source:NCBI;gene;(formerly;Entrezgene);Acc:103222808]
ENSCSAT00000010515.1	6318	6160.51	333.446	940.535	cdna;chromosome:ChlSab1.1:17:27911013:27921251:-1;gene:ENSCSAG00000012423.1;gene_biotype:protein_coding;transcript_biotype:protein_coding;gene_symbol:HSP90AB1;description:heat;shock;protein;90;alpha;family;class;B;member;1;[Source:NCBI;gene;(formerly;Entrezgene);Acc:103221436]
ENSCSAT00000007814.1	1063	905.514	332.852	138	cdna;chromosome:ChlSab1.1:1:2190845:2211389:1;gene:ENSCSAG00000009729.1;gene_biotype:protein_coding;transcript_biotype:protein_coding;gene_symbol:CD81;description:CD81;molecule;[Source:NCBI;gene;(formerly;Entrezgene);Acc:103240440]
ENSCSAT00000001033.1	1947	1789.51	332.584	272.502	cdna;chromosome:ChlSab1.1:16:64549689:64552343:-1;gene:ENSCSAG00000003007.1;gene_biotype:protein_coding;transcript_biotype:protein_coding
ENSCSAT00000004899.1	2301	2143.51	330.13	324	cdna;chromosome:ChlSab1.1:6:10062790:10091377:1;gene:ENSCSAG00000006885.1;gene_biotype:protein_coding;transcript_biotype:protein_coding;gene_symbol:LDLR;description:low;density;lipoprotein;receptor;[Source:HGNC;Symbol;Acc:HGNC:6547]
ENSCSAT00000003044.1	1071	913.514	329.41	137.78	cdna;chromosome:ChlSab1.1:1:46532745:46540441:-1;gene:ENSCSAG00000005035.1;gene_biotype:protein_coding;transcript_biotype:protein_coding
ENSCSAT00000005297.1	5895	5737.51	328.514	863	cdna;chromosome:ChlSab1.1:26:43410580:43427812:-1;gene:ENSCSAG00000007255.1;gene_biotype:protein_coding;transcript_biotype:protein_coding;gene_symbol:THBS1;description:thrombospondin;1;[Source:NCBI;gene;(formerly;Entrezgene);Acc:103245860]
ENSCSAT00000015313.1	1438	1280.51	327.559	192.047	cdna;chromosome:ChlSab1.1:4:25132972:25134502:1;gene:ENSCSAG00000017221.1;gene_biotype:protein_coding;transcript_biotype:protein_coding
ENSCSAT00000005191.1	2209	2051.51	326.837	307	cdna;chromosome:ChlSab1.1:14:98057576:98065500:1;gene:ENSCSAG00000007145.1;gene_biotype:protein_coding;transcript_biotype:protein_coding;gene_symbol:YWHAQ;description:tyrosine;3-monooxygenase/tryptophan;5-monooxygenase;activation;protein;theta;[Source:HGNC;Symbol;Acc:HGNC:12854]
ENSCSAT00000015768.1	2838	2680.51	326.733	401	cdna;chromosome:ChlSab1.1:28:16127015:16142337:-1;gene:ENSCSAG00000017673.1;gene_biotype:protein_coding;transcript_biotype:protein_coding;gene_symbol:FSCN1;description:fascin;actin-bundling;protein;1;[Source:NCBI;gene;(formerly;Entrezgene);Acc:103246831]
ENSCSAT00000019612.1	633	475.59	326.056	71	cdna;chromosome:ChlSab1.1:21:116427583:116428215:-1;gene:ENSCSAG00000019522.1;gene_biotype:protein_coding;transcript_biotype:protein_coding
ENSCSAT00000011198.1	2124	1966.51	325.415	293	cdna;chromosome:ChlSab1.1:23:41231364:41251150:-1;gene:ENSCSAG00000013103.1;gene_biotype:protein_coding;transcript_biotype:protein_coding;gene_symbol:HSPA9;description:heat;shock;protein;family;A;(Hsp70);member;9;[Source:NCBI;gene;(formerly;Entrezgene);Acc:103244606]
ENSCSAT00000001215.1	575	417.611	324.255	62	cdna;chromosome:ChlSab1.1:5:69967900:70019307:-1;gene:ENSCSAG00000003191.1;gene_biotype:protein_coding;transcript_biotype:protein_coding;gene_symbol:COTL1;description:coactosin;like;F-actin;binding;protein;1;[Source:NCBI;gene;(formerly;Entrezgene);Acc:103233395]
ENSCSAT00000001264.1	3285	3127.51	324.03	464	cdna;chromosome:ChlSab1.1:6:38415788:38452679:1;gene:ENSCSAG00000003235.1;gene_biotype:protein_coding;transcript_biotype:protein_coding;gene_symbol:CLPTM1;description:CLPTM1;regulator;of;GABA;type;A;receptor;forward;trafficking;[Source:HGNC;Symbol;Acc:HGNC:2087]
ENSCSAT00000008361.1	1905	1747.51	323.702	259	cdna;chromosome:ChlSab1.1:14:79201649:79222373:-1;gene:ENSCSAG00000010278.1;gene_biotype:protein_coding;transcript_biotype:protein_coding;gene_symbol:FOSL2;description:FOS;like;2,;AP-1;transcription;factor;subunit;[Source:NCBI;gene;(formerly;Entrezgene);Acc:103220575]
ENSCSAT00000015002.1	692	534.574	322.765	79	cdna;chromosome:ChlSab1.1:22:1949817:1954466:1;gene:ENSCSAG00000016907.1;gene_biotype:protein_coding;transcript_biotype:protein_coding;description:ribosomal;protein;L14;[Source:NCBI;gene;(formerly;Entrezgene);Acc:103227436]
ENSCSAT00000018929.1	672	514.574	322.577	76	cdna;chromosome:ChlSab1.1:6:11836706:11837377:1;gene:ENSCSAG00000018839.1;gene_biotype:protein_coding;transcript_biotype:protein_coding;gene_symbol:IER2;description:immediate;early;response;2;[Source:NCBI;gene;(formerly;Entrezgene);Acc:103234013]
ENSCSAT00000003598.1	1852	1694.51	322.227	250	cdna;chromosome:ChlSab1.1:11:49125362:49159034:1;gene:ENSCSAG00000005574.1;gene_biotype:protein_coding;transcript_biotype:protein_coding;gene_symbol:EIF4B;description:eukaryotic;translation;initiation;factor;4B;[Source:NCBI;gene;(formerly;Entrezgene);Acc:103238376]
ENSCSAT00000005577.1	1401	1243.51	321.416	183	cdna;chromosome:ChlSab1.1:12:94768480:94789743:-1;gene:ENSCSAG00000007560.1;gene_biotype:protein_coding;transcript_biotype:protein_coding
ENSCSAT00000014705.1	1748	1590.51	319.684	232.805	cdna;chromosome:ChlSab1.1:12:945459:948065:-1;gene:ENSCSAG00000016610.1;gene_biotype:protein_coding;transcript_biotype:protein_coding;gene_symbol:TUBB4B;description:tubulin;beta;4B;class;IVb;[Source:NCBI;gene;(formerly;Entrezgene);Acc:103239564]
ENSCSAT00000014243.1	2795	2637.51	317.154	383	cdna;chromosome:ChlSab1.1:25:5846298:5905402:-1;gene:ENSCSAG00000016150.1;gene_biotype:protein_coding;transcript_biotype:protein_coding;gene_symbol:CAPN2;description:calpain;2;[Source:NCBI;gene;(formerly;Entrezgene);Acc:103230023]
ENSCSAT00000016633.1	2513	2355.51	317.108	342	cdna;chromosome:ChlSab1.1:20:9847968:9853413:1;gene:ENSCSAG00000001894.1;gene_biotype:protein_coding;transcript_biotype:protein_coding;gene_symbol:SLC39A1;description:solute;carrier;family;39;member;1;[Source:NCBI;gene;(formerly;Entrezgene);Acc:103223940]
ENSCSAT00000008077.1	9491	9333.51	315.67	1349	cdna;chromosome:ChlSab1.1:21:97431648:97461135:1;gene:ENSCSAG00000009985.1;gene_biotype:protein_coding;transcript_biotype:protein_coding;gene_symbol:FLNC;description:filamin;C;[Source:NCBI;gene;(formerly;Entrezgene);Acc:103226867]
ENSCSAT00000007498.1	372	214.928	315.018	31	cdna;chromosome:ChlSab1.1:2:60661696:60662068:-1;gene:ENSCSAG00000009429.1;gene_biotype:pseudogene;transcript_biotype:pseudogene
ENSCSAT00000007115.1	1401	1243.51	314.39	179	cdna;chromosome:ChlSab1.1:10:102469669:102503276:1;gene:ENSCSAG00000009048.1;gene_biotype:protein_coding;transcript_biotype:protein_coding;gene_symbol:IGFBP2;description:insulin;like;growth;factor;binding;protein;2;[Source:NCBI;gene;(formerly;Entrezgene);Acc:103217825]
ENSCSAT00000000444.1	1209	1051.51	313.638	151	cdna;chromosome:ChlSab1.1:6:43012269:43017879:1;gene:ENSCSAG00000002427.1;gene_biotype:protein_coding;transcript_biotype:protein_coding;gene_symbol:PTOV1;description:PTOV1;extended;AT-hook;containing;adaptor;protein;[Source:HGNC;Symbol;Acc:HGNC:9632]
ENSCSAT00000007888.1	542	384.633	312.308	55	cdna;chromosome:ChlSab1.1:1:1768380:1777791:1;gene:ENSCSAG00000009837.1;gene_biotype:protein_coding;transcript_biotype:protein_coding;description:mitochondrial;ribosomal;protein;L23;[Source:NCBI;gene;(formerly;Entrezgene);Acc:103238649]
ENSCSAT00000009007.1	2613	2455.51	312.199	351	cdna;chromosome:ChlSab1.1:21:85222879:85258627:1;gene:ENSCSAG00000010920.1;gene_biotype:protein_coding;transcript_biotype:protein_coding;gene_symbol:CAV1;description:caveolin;1;[Source:NCBI;gene;(formerly;Entrezgene);Acc:103226770]
ENSCSAT00000010811.1	1845	1687.51	311.915	241	cdna;chromosome:ChlSab1.1:13:86344051:86370622:-1;gene:ENSCSAG00000012781.1;gene_biotype:protein_coding;transcript_biotype:protein_coding;gene_symbol:EZR;description:ezrin;[Source:HGNC;Symbol;Acc:HGNC:12691]
ENSCSAT00000013612.1	4584	4426.51	309.859	628	cdna;chromosome:ChlSab1.1:2:6404515:6465982:1;gene:ENSCSAG00000015515.1;gene_biotype:protein_coding;transcript_biotype:protein_coding;gene_symbol:PMEPA1;description:prostate;transmembrane;protein,;androgen;induced;1;[Source:NCBI;gene;(formerly;Entrezgene);Acc:103243687]
ENSCSAT00000002852.1	2875	2717.51	308.622	384	cdna;chromosome:ChlSab1.1:11:53397357:53424681:1;gene:ENSCSAG00000004852.1;gene_biotype:protein_coding;transcript_biotype:protein_coding;gene_symbol:MARS1;description:methionyl-tRNA;synthetase;1;[Source:HGNC;Symbol;Acc:HGNC:6898]
ENSCSAT00000013438.1	2989	2831.51	308.538	400	cdna;chromosome:ChlSab1.1:4:71095500:71110005:1;gene:ENSCSAG00000015342.1;gene_biotype:protein_coding;transcript_biotype:protein_coding;gene_symbol:F2RL1;description:F2R;like;trypsin;receptor;1;[Source:NCBI;gene;(formerly;Entrezgene);Acc:103223368]
ENSCSAT00000018282.1	384	226.854	308.085	32	cdna;chromosome:ChlSab1.1:25:27945608:27945991:1;gene:ENSCSAG00000000253.1;gene_biotype:protein_coding;transcript_biotype:protein_coding;gene_symbol:PHLDA3;description:pleckstrin;homology;like;domain;family;A;member;3;[Source:NCBI;gene;(formerly;Entrezgene);Acc:103230329]
ENSCSAT00000019239.1	330	173.434	307.258	24.399	cdna;chromosome:ChlSab1.1:21:109089363:109089692:-1;gene:ENSCSAG00000019149.1;gene_biotype:protein_coding;transcript_biotype:protein_coding
ENSCSAT00000019036.1	267	113.815	307.033	16	cdna;chromosome:ChlSab1.1:11:115851381:115851647:1;gene:ENSCSAG00000018946.1;gene_biotype:protein_coding;transcript_biotype:protein_coding;gene_symbol:DYNLL1;description:dynein;light;chain;1,;cytoplasmic;[Source:NCBI;gene;(formerly;Entrezgene);Acc:103227169]
ENSCSAT00000000081.1	342	185.256	306.526	26	cdna;chromosome:ChlSab1.1:11:118603089:118612971:-1;gene:ENSCSAG00000002066.1;gene_biotype:protein_coding;transcript_biotype:protein_coding;gene_symbol:CDK2AP1;description:cyclin;dependent;kinase;2;associated;protein;1;[Source:NCBI;gene;(formerly;Entrezgene);Acc:103239327]
ENSCSAT00000016621.1	469	311.684	305.827	43.644	cdna;chromosome:ChlSab1.1:11:126258417:126260583:1;gene:ENSCSAG00000001906.1;gene_biotype:protein_coding;transcript_biotype:protein_coding;gene_symbol:RAN;description:RAN,;member;RAS;oncogene;family;[Source:HGNC;Symbol;Acc:HGNC:9846]
ENSCSAT00000017220.1	1731	1573.51	305.365	220	cdna;chromosome:ChlSab1.1:20:78052607:78086303:1;gene:ENSCSAG00000001313.1;gene_biotype:protein_coding;transcript_biotype:protein_coding;gene_symbol:DHCR24;description:24-dehydrocholesterol;reductase;[Source:HGNC;Symbol;Acc:HGNC:2859]
ENSCSAT00000018058.1	276	121.951	304.46	17	cdna;chromosome:ChlSab1.1:12:20096443:20096718:1;gene:ENSCSAG00000000477.1;gene_biotype:protein_coding;transcript_biotype:protein_coding;description:cytochrome;b-c1;complex;subunit;6,;mitochondrial;[Source:NCBI;gene;(formerly;Entrezgene);Acc:103218927]
ENSCSAT00000004815.1	8543	8385.51	303.694	1166	cdna;chromosome:ChlSab1.1:X:128657393:128680531:-1;gene:ENSCSAG00000006772.1;gene_biotype:protein_coding;transcript_biotype:protein_coding;gene_symbol:FLNA;description:filamin;A;[Source:NCBI;gene;(formerly;Entrezgene);Acc:103232822]
ENSCSAT00000012097.1	2971	2813.51	301.196	388	cdna;chromosome:ChlSab1.1:25:27908554:27933275:1;gene:ENSCSAG00000014006.1;gene_biotype:protein_coding;transcript_biotype:protein_coding;gene_symbol:CSRP1;description:cysteine;and;glycine;rich;protein;1;[Source:NCBI;gene;(formerly;Entrezgene);Acc:103230328]
ENSCSAT00000017925.1	1152	994.514	300.868	137	cdna;chromosome:ChlSab1.1:1:78065492:78066643:1;gene:ENSCSAG00000000610.1;gene_biotype:protein_coding;transcript_biotype:protein_coding;gene_symbol:PRSS23;description:serine;protease;23;[Source:NCBI;gene;(formerly;Entrezgene);Acc:103248176]
ENSCSAT00000005322.1	492	334.668	300.163	45.994	cdna;chromosome:ChlSab1.1:26:42962525:42965352:1;gene:ENSCSAG00000007304.1;gene_biotype:protein_coding;transcript_biotype:protein_coding;description:signal;recognition;particle;14;[Source:NCBI;gene;(formerly;Entrezgene);Acc:103245852]
ENSCSAT00000006678.1	2546	2388.51	299.925	328	cdna;chromosome:ChlSab1.1:22:52391813:52417575:1;gene:ENSCSAG00000008622.1;gene_biotype:protein_coding;transcript_biotype:protein_coding;gene_symbol:RPN1;description:ribophorin;I;[Source:NCBI;gene;(formerly;Entrezgene);Acc:103228090]
ENSCSAT00000018885.1	576	418.61	297.394	57	cdna;chromosome:ChlSab1.1:10:120543575:120544150:-1;gene:ENSCSAG00000018795.1;gene_biotype:protein_coding;transcript_biotype:protein_coding;gene_symbol:ARL4C;description:ADP;ribosylation;factor;like;GTPase;4C;[Source:NCBI;gene;(formerly;Entrezgene);Acc:103218131]
ENSCSAT00000018444.1	402	244.781	296.025	33.177	cdna;chromosome:ChlSab1.1:20:2151672:2152073:1;gene:ENSCSAG00000000090.1;gene_biotype:protein_coding;transcript_biotype:protein_coding
ENSCSAT00000016808.1	2031	1873.51	294.938	253	cdna;chromosome:ChlSab1.1:6:48245297:48265019:1;gene:ENSCSAG00000001722.1;gene_biotype:protein_coding;transcript_biotype:protein_coding;gene_symbol:U2AF2;description:U2;small;nuclear;RNA;auxiliary;factor;2;[Source:NCBI;gene;(formerly;Entrezgene);Acc:103235336]
ENSCSAT00000001979.1	1981	1823.51	294.641	246	cdna;chromosome:ChlSab1.1:6:33452852:33466284:-1;gene:ENSCSAG00000003951.1;gene_biotype:protein_coding;transcript_biotype:protein_coding;description:heterogeneous;nuclear;ribonucleoprotein;L;[Source:NCBI;gene;(formerly;Entrezgene);Acc:103234642]
ENSCSAT00000007559.1	501	343.661	292.344	46	cdna;chromosome:ChlSab1.1:26:39250800:39251790:-1;gene:ENSCSAG00000009475.1;gene_biotype:protein_coding;transcript_biotype:protein_coding;gene_symbol:SERF2;description:small;EDRK-rich;factor;2;[Source:HGNC;Symbol;Acc:HGNC:10757]
ENSCSAT00000001408.1	1243	1085.51	291.742	145	cdna;chromosome:ChlSab1.1:16:63287208:63292473:-1;gene:ENSCSAG00000003383.1;gene_biotype:protein_coding;transcript_biotype:protein_coding;description:ribosomal;protein;L27;[Source:NCBI;gene;(formerly;Entrezgene);Acc:103243377]
ENSCSAT00000018264.1	390	232.825	290.803	31	cdna;chromosome:ChlSab1.1:25:1279511:1279900:1;gene:ENSCSAG00000000271.1;gene_biotype:protein_coding;transcript_biotype:protein_coding;gene_symbol:H2AW;description:histone;cluster;3,;H2a;[Source:NCBI;gene;(formerly;Entrezgene);Acc:103229950]
ENSCSAT00000008416.1	1660	1502.51	290.722	200	cdna;chromosome:ChlSab1.1:11:6802980:6808101:1;gene:ENSCSAG00000010328.1;gene_biotype:protein_coding;transcript_biotype:protein_coding
ENSCSAT00000004655.1	624	466.594	290.214	62	cdna;chromosome:ChlSab1.1:6:11356544:11357884:-1;gene:ENSCSAG00000006616.1;gene_biotype:protein_coding;transcript_biotype:protein_coding;gene_symbol:WDR83OS;description:WD;repeat;domain;83;opposite;strand;[Source:NCBI;gene;(formerly;Entrezgene);Acc:103233981]
ENSCSAT00000008728.1	1447	1289.51	289.626	171	cdna;chromosome:ChlSab1.1:14:78804548:78852682:-1;gene:ENSCSAG00000010645.1;gene_biotype:protein_coding;transcript_biotype:protein_coding;gene_symbol:PPP1CB;description:protein;phosphatase;1;catalytic;subunit;beta;[Source:NCBI;gene;(formerly;Entrezgene);Acc:103220572]
ENSCSAT00000001278.1	1826	1668.51	289.287	221	cdna;chromosome:ChlSab1.1:6:38363176:38375218:1;gene:ENSCSAG00000003249.1;gene_biotype:protein_coding;transcript_biotype:protein_coding;gene_symbol:TOMM40;description:translocase;of;outer;mitochondrial;membrane;40;[Source:NCBI;gene;(formerly;Entrezgene);Acc:103234840]
ENSCSAT00000000516.1	558	400.617	288.943	53	cdna;chromosome:ChlSab1.1:16:69307175:69312254:1;gene:ENSCSAG00000002502.1;gene_biotype:protein_coding;transcript_biotype:protein_coding;gene_symbol:ATP5MC1;description:ATP;synthase;F(0);complex;subunit;C1,;mitochondrial;[Source:NCBI;gene;(formerly;Entrezgene);Acc:103214808]
ENSCSAT00000003463.1	1503	1345.51	287.83	177.32	cdna;chromosome:ChlSab1.1:11:50396888:50400802:1;gene:ENSCSAG00000005436.1;gene_biotype:protein_coding;transcript_biotype:protein_coding;description:heterogeneous;nuclear;ribonucleoprotein;A1;[Source:NCBI;gene;(formerly;Entrezgene);Acc:103238430]
ENSCSAT00000019527.1	1020	862.514	287.821	113.664	cdna;chromosome:ChlSab1.1:14:30647196:30648215:1;gene:ENSCSAG00000019437.1;gene_biotype:protein_coding;transcript_biotype:protein_coding
ENSCSAT00000016637.1	1513	1355.51	286.802	178	cdna;chromosome:ChlSab1.1:6:46868055:46871739:1;gene:ENSCSAG00000001891.1;gene_biotype:protein_coding;transcript_biotype:protein_coding;gene_symbol:TSEN34;description:tRNA;splicing;endonuclease;subunit;34;[Source:NCBI;gene;(formerly;Entrezgene);Acc:103235258]
ENSCSAT00000018552.1	1248	1090.51	286.399	143	cdna;chromosome:ChlSab1.1:9:39059030:39060277:-1;gene:ENSCSAG00000018462.1;gene_biotype:processed_pseudogene;transcript_biotype:processed_pseudogene
ENSCSAT00000018437.1	478	320.679	286.053	42	cdna;chromosome:ChlSab1.1:7:117309172:117309649:1;gene:ENSCSAG00000000098.1;gene_biotype:protein_coding;transcript_biotype:protein_coding;description:NADH;dehydrogenase;[ubiquinone];iron-sulfur;protein;5-like;[Source:NCBI;gene;(formerly;Entrezgene);Acc:103236524]
ENSCSAT00000010847.1	5123	4965.51	285.457	648.991	cdna;chromosome:ChlSab1.1:6:545964:562630:1;gene:ENSCSAG00000012749.1;gene_biotype:protein_coding;transcript_biotype:protein_coding;gene_symbol:PTBP1;description:polypyrimidine;tract;binding;protein;1;[Source:NCBI;gene;(formerly;Entrezgene);Acc:103233576]
ENSCSAT00000006224.1	2197	2039.51	285.306	266.423	cdna;chromosome:ChlSab1.1:17:41941869:41946176:-1;gene:ENSCSAG00000008172.1;gene_biotype:protein_coding;transcript_biotype:protein_coding
ENSCSAT00000010851.1	2402	2244.51	285.11	293	cdna;chromosome:ChlSab1.1:2:36058919:36116470:-1;gene:ENSCSAG00000012757.1;gene_biotype:protein_coding;transcript_biotype:protein_coding;gene_symbol:BCL2L1;description:BCL2;like;1;[Source:NCBI;gene;(formerly;Entrezgene);Acc:103248011]
ENSCSAT00000000566.1	354	197.093	285.068	25.725	cdna;chromosome:ChlSab1.1:1:110388395:110389390:-1;gene:ENSCSAG00000002549.1;gene_biotype:protein_coding;transcript_biotype:protein_coding
ENSCSAT00000005244.1	1785	1627.51	284.497	212	cdna;chromosome:ChlSab1.1:X:124191390:124214157:-1;gene:ENSCSAG00000007199.1;gene_biotype:protein_coding;transcript_biotype:protein_coding;gene_symbol:IDS;description:iduronate;2-sulfatase;[Source:NCBI;gene;(formerly;Entrezgene);Acc:103232717]
ENSCSAT00000003843.1	3823	3665.51	283.621	476	cdna;chromosome:ChlSab1.1:11:48315946:48338923:-1;gene:ENSCSAG00000005813.1;gene_biotype:protein_coding;transcript_biotype:protein_coding;gene_symbol:KRT80;description:keratin;80;[Source:NCBI;gene;(formerly;Entrezgene);Acc:103238340]
ENSCSAT00000000171.1	9326	9168.51	283.237	1189	cdna;chromosome:ChlSab1.1:16:73982899:74006551:-1;gene:ENSCSAG00000002155.1;gene_biotype:protein_coding;transcript_biotype:protein_coding;gene_symbol:FASN;description:fatty;acid;synthase;[Source:NCBI;gene;(formerly;Entrezgene);Acc:103243754]
ENSCSAT00000003137.1	905	747.527	282.505	96.691	cdna;chromosome:ChlSab1.1:16:44945200:44946438:1;gene:ENSCSAG00000005108.1;gene_biotype:protein_coding;transcript_biotype:protein_coding;gene_symbol:SRSF2;description:serine;and;arginine;rich;splicing;factor;2;[Source:NCBI;gene;(formerly;Entrezgene);Acc:103242985]
ENSCSAT00000006872.1	2657	2499.51	278.895	319.175	cdna;chromosome:ChlSab1.1:16:15277619:15289363:-1;gene:ENSCSAG00000008809.1;gene_biotype:protein_coding;transcript_biotype:protein_coding;description:ubiquitin;B;[Source:NCBI;gene;(formerly;Entrezgene);Acc:103242447]
ENSCSAT00000012166.1	972	814.516	278.869	104	cdna;chromosome:ChlSab1.1:16:1035250:1087013:-1;gene:ENSCSAG00000014074.1;gene_biotype:protein_coding;transcript_biotype:protein_coding;gene_symbol:YWHAE;description:tyrosine;3-monooxygenase/tryptophan;5-monooxygenase;activation;protein;epsilon;[Source:HGNC;Symbol;Acc:HGNC:12851]
ENSCSAT00000018290.1	651	493.585	278.77	63	cdna;chromosome:ChlSab1.1:25:44665080:44665730:-1;gene:ENSCSAG00000000245.1;gene_biotype:protein_coding;transcript_biotype:protein_coding;description:peptidyl-prolyl;cis-trans;isomerase;B;[Source:NCBI;gene;(formerly;Entrezgene);Acc:103230436]
ENSCSAT00000006749.1	5531	5373.51	278.419	685	cdna;chromosome:ChlSab1.1:14:81666793:81717508:1;gene:ENSCSAG00000008688.1;gene_biotype:protein_coding;transcript_biotype:protein_coding;gene_symbol:KIF3C;description:kinesin;family;member;3C;[Source:NCBI;gene;(formerly;Entrezgene);Acc:103220646]
ENSCSAT00000013627.1	1682	1524.51	277.931	194	cdna;chromosome:ChlSab1.1:22:10000864:10012202:-1;gene:ENSCSAG00000015535.1;gene_biotype:protein_coding;transcript_biotype:protein_coding;gene_symbol:UQCRC1;description:ubiquinol-cytochrome;c;reductase;core;protein;1;[Source:HGNC;Symbol;Acc:HGNC:12585]
ENSCSAT00000006854.1	1866	1708.51	276.123	216	cdna;chromosome:ChlSab1.1:8:138296002:138299370:1;gene:ENSCSAG00000008794.1;gene_biotype:protein_coding;transcript_biotype:protein_coding;gene_symbol:GPAA1;description:glycosylphosphatidylinositol;anchor;attachment;1;[Source:NCBI;gene;(formerly;Entrezgene);Acc:103237604]
ENSCSAT00000002060.1	1274	1116.51	275.817	141	cdna;chromosome:ChlSab1.1:11:71522837:71678825:-1;gene:ENSCSAG00000004030.1;gene_biotype:protein_coding;transcript_biotype:protein_coding;gene_symbol:NAP1L1;description:nucleosome;assembly;protein;1;like;1;[Source:HGNC;Symbol;Acc:HGNC:7637]
ENSCSAT00000000665.1	739	581.567	274.151	73	cdna;chromosome:ChlSab1.1:16:67431052:67442814:-1;gene:ENSCSAG00000002649.1;gene_biotype:protein_coding;transcript_biotype:protein_coding;gene_symbol:PSMB3;description:proteasome;20S;subunit;beta;3;[Source:NCBI;gene;(formerly;Entrezgene);Acc:103243561]
ENSCSAT00000008230.1	867	709.541	273.955	89	cdna;chromosome:ChlSab1.1:11:7001255:7004264:-1;gene:ENSCSAG00000010145.1;gene_biotype:protein_coding;transcript_biotype:protein_coding;gene_symbol:PHB2;description:prohibitin;2;[Source:HGNC;Symbol;Acc:HGNC:30306]
ENSCSAT00000001813.1	1038	880.514	272.85	110	cdna;chromosome:ChlSab1.1:6:34370558:34376836:-1;gene:ENSCSAG00000003783.1;gene_biotype:protein_coding;transcript_biotype:protein_coding;gene_symbol:FBL;description:fibrillarin;[Source:NCBI;gene;(formerly;Entrezgene);Acc:103234689]
ENSCSAT00000017465.1	750	592.561	272.751	74	cdna;chromosome:ChlSab1.1:20:99834334:99858781:1;gene:ENSCSAG00000001068.1;gene_biotype:protein_coding;transcript_biotype:protein_coding;gene_symbol:AK2;description:adenylate;kinase;2;[Source:NCBI;gene;(formerly;Entrezgene);Acc:103225169]
ENSCSAT00000013173.1	1359	1201.51	272.665	150	cdna;chromosome:ChlSab1.1:22:10754970:10757057:-1;gene:ENSCSAG00000015079.1;gene_biotype:protein_coding;transcript_biotype:protein_coding;gene_symbol:GPX1;description:glutathione;peroxidase;1;[Source:HGNC;Symbol;Acc:HGNC:4553]
ENSCSAT00000018122.1	414	256.752	272.21	32	cdna;chromosome:ChlSab1.1:7:34806030:34806443:1;gene:ENSCSAG00000000413.1;gene_biotype:protein_coding;transcript_biotype:protein_coding;description:mitochondrial;ribosomal;protein;S16;[Source:NCBI;gene;(formerly;Entrezgene);Acc:103216005]
ENSCSAT00000003444.1	1049	891.514	271.933	111	cdna;chromosome:ChlSab1.1:16:42932549:42947655:1;gene:ENSCSAG00000005412.1;gene_biotype:protein_coding;transcript_biotype:protein_coding;gene_symbol:LRRC59;description:leucine;rich;repeat;containing;59;[Source:NCBI;gene;(formerly;Entrezgene);Acc:103242937]
ENSCSAT00000004206.1	1456	1298.51	270.798	161	cdna;chromosome:ChlSab1.1:5:26573638:26585849:-1;gene:ENSCSAG00000006170.1;gene_biotype:protein_coding;transcript_biotype:protein_coding;gene_symbol:PPP4C;description:protein;phosphatase;4;catalytic;subunit;[Source:NCBI;gene;(formerly;Entrezgene);Acc:103230568]
ENSCSAT00000000611.1	444	286.706	269.842	35.423	cdna;chromosome:ChlSab1.1:1:109779059:109789089:1;gene:ENSCSAG00000002592.1;gene_biotype:protein_coding;transcript_biotype:protein_coding;description:ATP;synthase;membrane;subunit;g;[Source:NCBI;gene;(formerly;Entrezgene);Acc:103248591]
ENSCSAT00000016790.1	1040	882.514	269.756	109	cdna;chromosome:ChlSab1.1:6:47967680:47971316:-1;gene:ENSCSAG00000001740.1;gene_biotype:protein_coding;transcript_biotype:protein_coding;gene_symbol:IL11;description:interleukin;11;[Source:HGNC;Symbol;Acc:HGNC:5966]
ENSCSAT00000012020.1	7342	7184.51	269.341	886	cdna;chromosome:ChlSab1.1:16:1321416:1352466:-1;gene:ENSCSAG00000013929.1;gene_biotype:protein_coding;transcript_biotype:protein_coding;gene_symbol:PRPF8;description:pre-mRNA;processing;factor;8;[Source:NCBI;gene;(formerly;Entrezgene);Acc:103242106]
ENSCSAT00000002219.1	486	328.671	267.964	40.325	cdna;chromosome:ChlSab1.1:1:63301885:63307553:-1;gene:ENSCSAG00000004190.1;gene_biotype:protein_coding;transcript_biotype:protein_coding;gene_symbol:LAMTOR1;description:late;endosomal/lysosomal;adaptor,;MAPK;and;MTOR;activator;1;[Source:NCBI;gene;(formerly;Entrezgene);Acc:103247983]
ENSCSAT00000016669.1	444	286.706	266.623	35	cdna;chromosome:ChlSab1.1:20:10173114:10177223:-1;gene:ENSCSAG00000001861.1;gene_biotype:protein_coding;transcript_biotype:protein_coding;gene_symbol:S100A1;description:S100;calcium;binding;protein;A1;[Source:HGNC;Symbol;Acc:HGNC:10486]
ENSCSAT00000014191.1	690	532.574	266.563	65	cdna;chromosome:ChlSab1.1:27:42763302:42764461:1;gene:ENSCSAG00000016101.1;gene_biotype:protein_coding;transcript_biotype:protein_coding;gene_symbol:MRFAP1;description:Morf4;family;associated;protein;1;[Source:NCBI;gene;(formerly;Entrezgene);Acc:103246409]
ENSCSAT00000006751.1	462	304.697	265.217	37	cdna;chromosome:ChlSab1.1:23:79842948:79846984:-1;gene:ENSCSAG00000008690.1;gene_biotype:protein_coding;transcript_biotype:protein_coding;gene_symbol:NHP2;description:NHP2;ribonucleoprotein;[Source:NCBI;gene;(formerly;Entrezgene);Acc:103245073]
ENSCSAT00000004680.1	419	261.746	264.735	31.727	cdna;chromosome:ChlSab1.1:10:117715201:117722036:1;gene:ENSCSAG00000006643.1;gene_biotype:protein_coding;transcript_biotype:protein_coding
ENSCSAT00000008384.1	438	280.715	264.533	34	cdna;chromosome:ChlSab1.1:2:56617538:56619188:1;gene:ENSCSAG00000010303.1;gene_biotype:protein_coding;transcript_biotype:protein_coding;gene_symbol:ROMO1;description:reactive;oxygen;species;modulator;1;[Source:NCBI;gene;(formerly;Entrezgene);Acc:103216254]
ENSCSAT00000003109.1	679	521.574	263.81	63	cdna;chromosome:ChlSab1.1:5:42540285:42541894:1;gene:ENSCSAG00000005089.1;gene_biotype:protein_coding;transcript_biotype:protein_coding
ENSCSAT00000010086.1	539	381.635	263.255	46	cdna;chromosome:ChlSab1.1:8:96064379:96067511:-1;gene:ENSCSAG00000011997.1;gene_biotype:protein_coding;transcript_biotype:protein_coding;gene_symbol:ZNF706;description:zinc;finger;protein;706;[Source:NCBI;gene;(formerly;Entrezgene);Acc:103237225]
ENSCSAT00000008804.1	1083	925.514	261.943	111	cdna;chromosome:ChlSab1.1:23:59423334:59453531:-1;gene:ENSCSAG00000010724.1;gene_biotype:protein_coding;transcript_biotype:protein_coding;gene_symbol:HAVCR1;description:hepatitis;A;virus;cellular;receptor;1;[Source:HGNC;Symbol;Acc:HGNC:17866]
ENSCSAT00000000332.1	2066	1908.51	260.876	227.962	cdna;chromosome:ChlSab1.1:11:113370198:113398321:-1;gene:ENSCSAG00000002316.1;gene_biotype:protein_coding;transcript_biotype:protein_coding;gene_symbol:WSB2;description:WD;repeat;and;SOCS;box;containing;2;[Source:NCBI;gene;(formerly;Entrezgene);Acc:103239218]
ENSCSAT00000016060.1	400	242.787	260.876	29	cdna;scaffold:ChlSab1.1:KE147546.1:249080:250467:1;gene:ENSCSAG00000017962.1;gene_biotype:protein_coding;transcript_biotype:protein_coding
ENSCSAT00000007811.1	1774	1616.51	260.762	193	cdna;chromosome:ChlSab1.1:9:44653289:44688954:1;gene:ENSCSAG00000009827.1;gene_biotype:protein_coding;transcript_biotype:protein_coding;description:glutamate;dehydrogenase;1;[Source:NCBI;gene;(formerly;Entrezgene);Acc:103215860]
ENSCSAT00000008296.1	1356	1198.51	258.769	142	cdna;chromosome:ChlSab1.1:21:96403609:96407215:1;gene:ENSCSAG00000010208.1;gene_biotype:protein_coding;transcript_biotype:protein_coding;gene_symbol:ARF5;description:ADP;ribosylation;factor;5;[Source:HGNC;Symbol;Acc:HGNC:658]
ENSCSAT00000002236.1	2008	1850.51	258.475	219	cdna;chromosome:ChlSab1.1:11:65214060:65230379:1;gene:ENSCSAG00000004209.1;gene_biotype:protein_coding;transcript_biotype:protein_coding;gene_symbol:CCT2;description:chaperonin;containing;TCP1;subunit;2;[Source:NCBI;gene;(formerly;Entrezgene);Acc:103238700]
ENSCSAT00000001586.1	3510	3352.51	257.983	396	cdna;chromosome:ChlSab1.1:16:62036412:62045614:-1;gene:ENSCSAG00000003556.1;gene_biotype:protein_coding;transcript_biotype:protein_coding;gene_symbol:GRN;description:granulin;precursor;[Source:NCBI;gene;(formerly;Entrezgene);Acc:103243324]
ENSCSAT00000003384.1	675	517.574	257.409	61	cdna;chromosome:ChlSab1.1:1:31547937:31570835:1;gene:ENSCSAG00000005360.1;gene_biotype:protein_coding;transcript_biotype:protein_coding;gene_symbol:CD59;description:CD59;molecule;(CD59;blood;group);[Source:NCBI;gene;(formerly;Entrezgene);Acc:103237990]
ENSCSAT00000016698.1	1102	944.514	256.674	111	cdna;chromosome:ChlSab1.1:20:11690767:11701815:1;gene:ENSCSAG00000001830.1;gene_biotype:protein_coding;transcript_biotype:protein_coding
ENSCSAT00000013789.1	566	408.613	256.564	48	cdna;chromosome:ChlSab1.1:21:13829330:13842796:1;gene:ENSCSAG00000015697.1;gene_biotype:protein_coding;transcript_biotype:protein_coding;gene_symbol:H2AZ2;description:H2A;histone;family;member;V;[Source:NCBI;gene;(formerly;Entrezgene);Acc:103226127]
ENSCSAT00000006969.1	721	563.573	255.776	66	cdna;chromosome:ChlSab1.1:23:79313594:79316408:1;gene:ENSCSAG00000008906.1;gene_biotype:protein_coding;transcript_biotype:protein_coding;description:PRELI;domain;containing;1;[Source:NCBI;gene;(formerly;Entrezgene);Acc:103245047]
ENSCSAT00000004773.1	1558	1400.51	255.754	164	cdna;chromosome:ChlSab1.1:11:42421910:42472838:-1;gene:ENSCSAG00000006731.1;gene_biotype:protein_coding;transcript_biotype:protein_coding;gene_symbol:SLC38A1;description:solute;carrier;family;38;member;1;[Source:NCBI;gene;(formerly;Entrezgene);Acc:103238195]
ENSCSAT00000003942.1	2425	2267.51	253.322	263	cdna;chromosome:ChlSab1.1:11:47437746:47443243:1;gene:ENSCSAG00000005901.1;gene_biotype:protein_coding;transcript_biotype:protein_coding;gene_symbol:DAZAP2;description:DAZ;associated;protein;2;[Source:NCBI;gene;(formerly;Entrezgene);Acc:103238319]
ENSCSAT00000018186.1	321	164.652	252.03	19	cdna;chromosome:ChlSab1.1:29:21208926:21209246:-1;gene:ENSCSAG00000000349.1;gene_biotype:protein_coding;transcript_biotype:protein_coding
ENSCSAT00000019236.1	357	200.061	251.091	23	cdna;chromosome:ChlSab1.1:21:105161670:105162026:1;gene:ENSCSAG00000019146.1;gene_biotype:protein_coding;transcript_biotype:protein_coding;description:metallothionein-2;[Source:NCBI;gene;(formerly;Entrezgene);Acc:103233029]
ENSCSAT00000001372.1	1681	1523.51	250.876	175	cdna;chromosome:ChlSab1.1:7:97676666:97682294:1;gene:ENSCSAG00000003344.1;gene_biotype:protein_coding;transcript_biotype:protein_coding;gene_symbol:RPS3A;description:40S;ribosomal;protein;S3a;[Source:NCBI;gene;(formerly;Entrezgene);Acc:103236378]
ENSCSAT00000001172.1	1437	1279.51	250.402	146.695	cdna;chromosome:ChlSab1.1:5:71206941:71215034:1;gene:ENSCSAG00000003144.1;gene_biotype:protein_coding;transcript_biotype:protein_coding;gene_symbol:COX4I1;description:cytochrome;c;oxidase;subunit;4;isoform;1,;mitochondrial;[Source:NCBI;gene;(formerly;Entrezgene);Acc:103233412]
ENSCSAT00000002664.1	3776	3618.51	250.368	414.803	cdna;chromosome:ChlSab1.1:11:53659336:53664861:-1;gene:ENSCSAG00000004632.1;gene_biotype:protein_coding;transcript_biotype:protein_coding;gene_symbol:CDK4;description:cyclin;dependent;kinase;4;[Source:NCBI;gene;(formerly;Entrezgene);Acc:103238589]
ENSCSAT00000004804.1	1789	1631.51	250.333	187	cdna;chromosome:ChlSab1.1:6:10360751:10374208:1;gene:ENSCSAG00000006761.1;gene_biotype:protein_coding;transcript_biotype:protein_coding;gene_symbol:PRKCSH;description:protein;kinase;C;substrate;80K-H;[Source:NCBI;gene;(formerly;Entrezgene);Acc:103233930]
ENSCSAT00000007890.1	568	410.613	249.996	47	cdna;chromosome:ChlSab1.1:6:5517797:5529455:-1;gene:ENSCSAG00000009802.1;gene_biotype:protein_coding;transcript_biotype:protein_coding;description:NADH:ubiquinone;oxidoreductase;subunit;A11;[Source:NCBI;gene;(formerly;Entrezgene);Acc:103233757]
ENSCSAT00000004906.1	874	716.541	249.942	82	cdna;chromosome:ChlSab1.1:1:10488346:10559702:-1;gene:ENSCSAG00000006861.1;gene_biotype:protein_coding;transcript_biotype:protein_coding;description:reticulon;3;[Source:NCBI;gene;(formerly;Entrezgene);Acc:103233675]
ENSCSAT00000015641.1	1014	856.514	249.896	98	cdna;chromosome:ChlSab1.1:3:58534973:58601812:1;gene:ENSCSAG00000017557.1;gene_biotype:protein_coding;transcript_biotype:protein_coding;gene_symbol:NDFIP2;description:Nedd4;family;interacting;protein;2;[Source:NCBI;gene;(formerly;Entrezgene);Acc:103214610]
ENSCSAT00000012579.1	691	533.574	249.691	61	cdna;chromosome:ChlSab1.1:17:45771:51669:1;gene:ENSCSAG00000014488.1;gene_biotype:protein_coding;transcript_biotype:protein_coding;gene_symbol:COX7A2;description:cytochrome;c;oxidase;subunit;7A2,;mitochondrial;[Source:NCBI;gene;(formerly;Entrezgene);Acc:103243885]
ENSCSAT00000003543.1	534	376.64	249.35	43	cdna;chromosome:ChlSab1.1:9:94809468:94811091:-1;gene:ENSCSAG00000005509.1;gene_biotype:protein_coding;transcript_biotype:protein_coding;gene_symbol:NPM3;description:nucleophosmin/nucleoplasmin;3;[Source:HGNC;Symbol;Acc:HGNC:7931]
ENSCSAT00000014988.1	2627	2469.51	248.52	281	cdna;chromosome:ChlSab1.1:22:2684022:2723949:1;gene:ENSCSAG00000016893.1;gene_biotype:protein_coding;transcript_biotype:protein_coding;gene_symbol:CTNNB1;description:catenin;beta;1;[Source:NCBI;gene;(formerly;Entrezgene);Acc:103227444]
ENSCSAT00000005966.1	721	563.573	248.026	64	cdna;chromosome:ChlSab1.1:19:19169286:19185735:-1;gene:ENSCSAG00000007919.1;gene_biotype:protein_coding;transcript_biotype:protein_coding;gene_symbol:TXN2;description:thioredoxin;2;[Source:NCBI;gene;(formerly;Entrezgene);Acc:103223247]
ENSCSAT00000016928.1	589	431.61	247.954	49	cdna;chromosome:ChlSab1.1:20:20936018:20938284:1;gene:ENSCSAG00000001602.1;gene_biotype:protein_coding;transcript_biotype:protein_coding;description:ras;homolog;family;member;C;[Source:NCBI;gene;(formerly;Entrezgene);Acc:103224206]
ENSCSAT00000018140.1	387	229.838	247.069	26	cdna;chromosome:ChlSab1.1:7:65001927:65002313:-1;gene:ENSCSAG00000000395.1;gene_biotype:protein_coding;transcript_biotype:protein_coding;description:histone;H2A.Z;[Source:NCBI;gene;(formerly;Entrezgene);Acc:103236032]
ENSCSAT00000007346.1	6007	5849.51	246.802	661	cdna;chromosome:ChlSab1.1:1:4907353:4922357:-1;gene:ENSCSAG00000009273.1;gene_biotype:protein_coding;transcript_biotype:protein_coding;gene_symbol:CCND1;description:cyclin;D1;[Source:NCBI;gene;(formerly;Entrezgene);Acc:103246489]
ENSCSAT00000009660.1	288	133.06	246.213	15	cdna;chromosome:ChlSab1.1:6:2206089:2206673:-1;gene:ENSCSAG00000011577.1;gene_biotype:protein_coding;transcript_biotype:protein_coding;gene_symbol:TIMM13;description:translocase;of;inner;mitochondrial;membrane;13;[Source:NCBI;gene;(formerly;Entrezgene);Acc:103233632]
ENSCSAT00000002385.1	594	436.607	245.116	49	cdna;chromosome:ChlSab1.1:6:30655243:30656584:1;gene:ENSCSAG00000004359.1;gene_biotype:protein_coding;transcript_biotype:protein_coding;gene_symbol:PSENEN;description:presenilin;enhancer,;gamma-secretase;subunit;[Source:NCBI;gene;(formerly;Entrezgene);Acc:103234532]
ENSCSAT00000000492.1	996	838.515	244.841	94	cdna;chromosome:ChlSab1.1:6:42854918:42863014:1;gene:ENSCSAG00000002474.1;gene_biotype:protein_coding;transcript_biotype:protein_coding;gene_symbol:PRMT1;description:protein;arginine;methyltransferase;1;[Source:HGNC;Symbol;Acc:HGNC:5187]
ENSCSAT00000010366.1	855	697.541	244.226	78	cdna;chromosome:ChlSab1.1:26:20466037:20487135:-1;gene:ENSCSAG00000012303.1;gene_biotype:protein_coding;transcript_biotype:protein_coding;gene_symbol:TPM1;description:tropomyosin;1;[Source:HGNC;Symbol;Acc:HGNC:12010]
ENSCSAT00000006811.1	2235	2077.51	242.848	231	cdna;chromosome:ChlSab1.1:1:6537273:6549450:1;gene:ENSCSAG00000008748.1;gene_biotype:protein_coding;transcript_biotype:protein_coding;gene_symbol:UNC93B1;description:unc-93;homolog;B1,;TLR;signaling;regulator;[Source:NCBI;gene;(formerly;Entrezgene);Acc:103216199]
ENSCSAT00000000679.1	4494	4336.51	242.758	482	cdna;chromosome:ChlSab1.1:16:67267940:67320373:-1;gene:ENSCSAG00000002659.1;gene_biotype:protein_coding;transcript_biotype:protein_coding;gene_symbol:LASP1;description:LIM;and;SH3;protein;1;[Source:NCBI;gene;(formerly;Entrezgene);Acc:103243556]
ENSCSAT00000015029.1	968	810.516	242.41	89.959	cdna;chromosome:ChlSab1.1:27:10850625:10854574:1;gene:ENSCSAG00000016932.1;gene_biotype:protein_coding;transcript_biotype:protein_coding
ENSCSAT00000005434.1	1656	1498.51	241.944	166	cdna;chromosome:ChlSab1.1:12:98347800:98353467:1;gene:ENSCSAG00000007387.1;gene_biotype:protein_coding;transcript_biotype:protein_coding;gene_symbol:CTSL;description:cathepsin;L;[Source:NCBI;gene;(formerly;Entrezgene);Acc:103219700]
ENSCSAT00000009216.1	3270	3112.51	241.714	344.466	cdna;chromosome:ChlSab1.1:9:38271930:38301579:-1;gene:ENSCSAG00000011145.1;gene_biotype:protein_coding;transcript_biotype:protein_coding
ENSCSAT00000013169.1	1704	1546.51	241.496	171	cdna;chromosome:ChlSab1.1:22:10757337:10772704:-1;gene:ENSCSAG00000015074.1;gene_biotype:protein_coding;transcript_biotype:protein_coding;gene_symbol:RHOA;description:ras;homolog;family;member;A;[Source:NCBI;gene;(formerly;Entrezgene);Acc:103227629]
ENSCSAT00000006635.1	746	588.566	241.204	65	cdna;chromosome:ChlSab1.1:17:40354653:40358401:-1;gene:ENSCSAG00000008597.1;gene_biotype:protein_coding;transcript_biotype:protein_coding;gene_symbol:CSNK2B;description:casein;kinase;2;beta;[Source:NCBI;gene;(formerly;Entrezgene);Acc:103221761]
ENSCSAT00000012156.1	2757	2599.51	241.133	287	cdna;chromosome:ChlSab1.1:2:20097108:20148926:-1;gene:ENSCSAG00000014069.1;gene_biotype:protein_coding;transcript_biotype:protein_coding;gene_symbol:MYBL2;description:MYB;proto-oncogene;like;2;[Source:NCBI;gene;(formerly;Entrezgene);Acc:103245748]
ENSCSAT00000019547.1	765	607.557	240.854	67	cdna;chromosome:ChlSab1.1:14:69736558:69737322:1;gene:ENSCSAG00000019457.1;gene_biotype:protein_coding;transcript_biotype:protein_coding;gene_symbol:CDC42EP3;description:CDC42;effector;protein;3;[Source:NCBI;gene;(formerly;Entrezgene);Acc:103220474]
ENSCSAT00000012756.1	1067	909.514	237.735	99	cdna;chromosome:ChlSab1.1:24:32311271:32328339:1;gene:ENSCSAG00000014660.1;gene_biotype:protein_coding;transcript_biotype:protein_coding;gene_symbol:LGALS3;description:galectin;3;[Source:NCBI;gene;(formerly;Entrezgene);Acc:103229030]
ENSCSAT00000001083.1	820	662.545	237.347	72	cdna;chromosome:ChlSab1.1:5:74023082:74030750:-1;gene:ENSCSAG00000003057.1;gene_biotype:protein_coding;transcript_biotype:protein_coding;gene_symbol:CYBA;description:cytochrome;b-245;light;chain;[Source:NCBI;gene;(formerly;Entrezgene);Acc:103233451]
ENSCSAT00000014402.1	3232	3074.51	237.267	334	cdna;chromosome:ChlSab1.1:27:39929787:39974012:1;gene:ENSCSAG00000016308.1;gene_biotype:protein_coding;transcript_biotype:protein_coding;gene_symbol:WDR1;description:WD;repeat;domain;1;[Source:NCBI;gene;(formerly;Entrezgene);Acc:103246372]
ENSCSAT00000018517.1	498	340.663	236.903	36.951	cdna;chromosome:ChlSab1.1:9:58566331:58566828:1;gene:ENSCSAG00000018427.1;gene_biotype:protein_coding;transcript_biotype:protein_coding
ENSCSAT00000016810.1	2777	2619.51	236.791	284	cdna;chromosome:ChlSab1.1:6:48267365:48288296:1;gene:ENSCSAG00000001720.1;gene_biotype:protein_coding;transcript_biotype:protein_coding;gene_symbol:EPN1;description:epsin;1;[Source:NCBI;gene;(formerly;Entrezgene);Acc:103235337]
ENSCSAT00000008373.1	583	425.61	236.055	46	cdna;chromosome:ChlSab1.1:17:35537336:35544826:-1;gene:ENSCSAG00000010291.1;gene_biotype:protein_coding;transcript_biotype:protein_coding;gene_symbol:SRSF3;description:serine;and;arginine;rich;splicing;factor;3;[Source:HGNC;Symbol;Acc:HGNC:10785]
ENSCSAT00000004335.1	3039	2881.51	234.967	310	cdna;chromosome:ChlSab1.1:5:26279544:26306290:-1;gene:ENSCSAG00000006297.1;gene_biotype:protein_coding;transcript_biotype:protein_coding;description:eukaryotic;translation;initiation;factor;3;subunit;C;[Source:NCBI;gene;(formerly;Entrezgene);Acc:103230378]
ENSCSAT00000004673.1	4549	4391.51	234.794	472.1	cdna;chromosome:ChlSab1.1:1:11257935:11281111:1;gene:ENSCSAG00000006636.1;gene_biotype:protein_coding;transcript_biotype:protein_coding;gene_symbol:GANAB;description:glucosidase;II;alpha;subunit;[Source:HGNC;Symbol;Acc:HGNC:4138]
ENSCSAT00000019416.1	315	158.812	233.793	17	cdna;chromosome:ChlSab1.1:1:50429781:50430095:-1;gene:ENSCSAG00000019326.1;gene_biotype:protein_coding;transcript_biotype:protein_coding
ENSCSAT00000003596.1	3921	3763.51	233.292	402	cdna;chromosome:ChlSab1.1:6:16040583:16066565:1;gene:ENSCSAG00000005562.1;gene_biotype:protein_coding;transcript_biotype:protein_coding;gene_symbol:COLGALT1;description:collagen;beta(1-O)galactosyltransferase;1;[Source:NCBI;gene;(formerly;Entrezgene);Acc:103234147]
ENSCSAT00000012147.1	3368	3210.51	232.658	342	cdna;chromosome:ChlSab1.1:16:1137397:1168008:-1;gene:ENSCSAG00000014058.1;gene_biotype:protein_coding;transcript_biotype:protein_coding;gene_symbol:MYO1C;description:myosin;IC;[Source:HGNC;Symbol;Acc:HGNC:7597]
ENSCSAT00000019598.1	598	428.61	231.367	45.404	cdna;chromosome:ChlSab1.1:18:17260655:17261252:1;gene:ENSCSAG00000019508.1;gene_biotype:protein_coding;transcript_biotype:protein_coding;description:60S;ribosomal;protein;L11-like;[Source:NCBI;gene;(formerly;Entrezgene);Acc:103244172]
ENSCSAT00000011971.1	645	487.585	231.16	51.606	cdna;chromosome:ChlSab1.1:22:13362375:13364975:-1;gene:ENSCSAG00000013884.1;gene_biotype:protein_coding;transcript_biotype:protein_coding;description:ribosomal;protein;L29;[Source:NCBI;gene;(formerly;Entrezgene);Acc:103227713]
ENSCSAT00000010224.1	2288	2130.51	230.656	225	cdna;chromosome:ChlSab1.1:5:683480:690757:1;gene:ENSCSAG00000012142.1;gene_biotype:protein_coding;transcript_biotype:protein_coding;gene_symbol:MSLN;description:mesothelin;[Source:HGNC;Symbol;Acc:HGNC:7371]
ENSCSAT00000016623.1	255	103.293	230.598	10.906	cdna;chromosome:ChlSab1.1:6:46779113:46782505:1;gene:ENSCSAG00000001905.1;gene_biotype:protein_coding;transcript_biotype:protein_coding;description:NADH:ubiquinone;oxidoreductase;subunit;A3;[Source:NCBI;gene;(formerly;Entrezgene);Acc:103235239]
ENSCSAT00000012594.1	414	256.752	229.677	27	cdna;chromosome:ChlSab1.1:25:25157206:25159587:1;gene:ENSCSAG00000014502.1;gene_biotype:protein_coding;transcript_biotype:protein_coding;gene_symbol:KISS1;description:KiSS-1;metastasis;suppressor;[Source:HGNC;Symbol;Acc:HGNC:6341]
ENSCSAT00000011658.1	2038	1880.51	228.8	197	cdna;chromosome:ChlSab1.1:15:5241223:5245120:-1;gene:ENSCSAG00000013562.1;gene_biotype:protein_coding;transcript_biotype:protein_coding;gene_symbol:AP2M1;description:adaptor;related;protein;complex;2;subunit;mu;1;[Source:HGNC;Symbol;Acc:HGNC:564]
ENSCSAT00000017685.1	4024	3866.51	228.207	404	cdna;chromosome:ChlSab1.1:20:116147040:116178644:1;gene:ENSCSAG00000000848.1;gene_biotype:protein_coding;transcript_biotype:protein_coding;gene_symbol:EPHA2;description:EPH;receptor;A2;[Source:NCBI;gene;(formerly;Entrezgene);Acc:103225530]
ENSCSAT00000003211.1	694	536.574	227.943	56	cdna;chromosome:ChlSab1.1:11:52268099:52272855:-1;gene:ENSCSAG00000005180.1;gene_biotype:protein_coding;transcript_biotype:protein_coding;description:canopy;FGF;signaling;regulator;2;[Source:NCBI;gene;(formerly;Entrezgene);Acc:103238522]
ENSCSAT00000007943.1	426	268.73	227.567	28	cdna;chromosome:ChlSab1.1:X:89731725:89736338:1;gene:ENSCSAG00000009861.1;gene_biotype:protein_coding;transcript_biotype:protein_coding
ENSCSAT00000005705.1	2204	2046.51	227.317	213	cdna;chromosome:ChlSab1.1:16:19396452:19427652:1;gene:ENSCSAG00000007658.1;gene_biotype:protein_coding;transcript_biotype:protein_coding;gene_symbol:MAP2K3;description:mitogen-activated;protein;kinase;kinase;3;[Source:NCBI;gene;(formerly;Entrezgene);Acc:103242535]
ENSCSAT00000006343.1	465	307.692	227.144	32	cdna;chromosome:ChlSab1.1:11:16277434:16287171:1;gene:ENSCSAG00000008292.1;gene_biotype:protein_coding;transcript_biotype:protein_coding;gene_symbol:MGST1;description:microsomal;glutathione;S-transferase;1;[Source:NCBI;gene;(formerly;Entrezgene);Acc:103218702]
ENSCSAT00000011974.1	12232	12074.5	226.164	1250.34	cdna;chromosome:ChlSab1.1:14:52262416:52487112:-1;gene:ENSCSAG00000013879.1;gene_biotype:protein_coding;transcript_biotype:protein_coding;gene_symbol:SPTBN1;description:spectrin;beta,;non-erythrocytic;1;[Source:NCBI;gene;(formerly;Entrezgene);Acc:103220257]
ENSCSAT00000004484.1	564	406.613	225.598	42	cdna;chromosome:ChlSab1.1:6:12433130:12437131:1;gene:ENSCSAG00000006444.1;gene_biotype:protein_coding;transcript_biotype:protein_coding;gene_symbol:C19orf53;description:chromosome;6;open;reading;frame,;human;C19orf53;[Source:NCBI;gene;(formerly;Entrezgene);Acc:103234019]
ENSCSAT00000003749.1	2569	2411.51	225.515	249	cdna;chromosome:ChlSab1.1:5:27870330:27882145:1;gene:ENSCSAG00000005711.1;gene_biotype:protein_coding;transcript_biotype:protein_coding;gene_symbol:FUS;description:FUS;RNA;binding;protein;[Source:NCBI;gene;(formerly;Entrezgene);Acc:103231346]
ENSCSAT00000017317.1	3369	3211.51	225.021	330.877	cdna;chromosome:ChlSab1.1:20:87267044:87279978:1;gene:ENSCSAG00000001216.1;gene_biotype:protein_coding;transcript_biotype:protein_coding;gene_symbol:PRDX1;description:peroxiredoxin;1;[Source:NCBI;gene;(formerly;Entrezgene);Acc:103224911]
ENSCSAT00000008860.1	1898	1740.51	224.617	179	cdna;chromosome:ChlSab1.1:6:3848401:3881412:-1;gene:ENSCSAG00000010771.1;gene_biotype:protein_coding;transcript_biotype:protein_coding;gene_symbol:MAP2K2;description:mitogen-activated;protein;kinase;kinase;2;[Source:NCBI;gene;(formerly;Entrezgene);Acc:103233717]
ENSCSAT00000019047.1	459	301.697	224.418	31	cdna;chromosome:ChlSab1.1:1:2741544:2742002:-1;gene:ENSCSAG00000018957.1;gene_biotype:protein_coding;transcript_biotype:protein_coding;gene_symbol:PHLDA2;description:pleckstrin;homology;like;domain;family;A;member;2;[Source:NCBI;gene;(formerly;Entrezgene);Acc:103241531]
ENSCSAT00000001633.1	372	214.928	223.561	22	cdna;chromosome:ChlSab1.1:11:91244648:91251733:1;gene:ENSCSAG00000003602.1;gene_biotype:protein_coding;transcript_biotype:protein_coding
ENSCSAT00000005242.1	920	762.526	223.412	78	cdna;chromosome:ChlSab1.1:1:9912898:9917361:-1;gene:ENSCSAG00000007195.1;gene_biotype:protein_coding;transcript_biotype:protein_coding;gene_symbol:PRDX5;description:peroxiredoxin;5;[Source:NCBI;gene;(formerly;Entrezgene);Acc:103233274]
ENSCSAT00000019571.1	630	472.59	221.832	48	cdna;chromosome:ChlSab1.1:28:9242909:9243538:-1;gene:ENSCSAG00000019481.1;gene_biotype:protein_coding;transcript_biotype:protein_coding;gene_symbol:CLDN4;description:claudin;4;[Source:NCBI;gene;(formerly;Entrezgene);Acc:103246624]
ENSCSAT00000009508.1	2649	2491.51	221.781	253	cdna;chromosome:ChlSab1.1:23:53123222:53155016:1;gene:ENSCSAG00000011472.1;gene_biotype:protein_coding;transcript_biotype:protein_coding;gene_symbol:NDST1;description:N-deacetylase;and;N-sulfotransferase;1;[Source:NCBI;gene;(formerly;Entrezgene);Acc:103244797]
ENSCSAT00000007591.1	464	306.694	221.667	31.127	cdna;chromosome:ChlSab1.1:14:80546839:80547912:1;gene:ENSCSAG00000009508.1;gene_biotype:protein_coding;transcript_biotype:protein_coding;gene_symbol:OST4;description:oligosaccharyltransferase;complex;subunit;4,;non-catalytic;[Source:NCBI;gene;(formerly;Entrezgene);Acc:103220618]
ENSCSAT00000000033.1	522	364.643	221.616	37	cdna;chromosome:ChlSab1.1:MT:14137:14658:-1;gene:ENSCSAG00000000033.1;gene_biotype:protein_coding;transcript_biotype:protein_coding;gene_symbol:ND6;description:NADH;dehydrogenase;subunit;6;[Source:NCBI;gene;(formerly;Entrezgene);Acc:4097499]
ENSCSAT00000000955.1	879	721.541	221.33	73.12	cdna;chromosome:ChlSab1.1:11:102453241:102454120:1;gene:ENSCSAG00000002925.1;gene_biotype:pseudogene;transcript_biotype:pseudogene
ENSCSAT00000017483.1	978	820.515	220.932	83	cdna;chromosome:ChlSab1.1:20:100639280:100648756:-1;gene:ENSCSAG00000001050.1;gene_biotype:protein_coding;transcript_biotype:protein_coding;description:eukaryotic;translation;initiation;factor;3;subunit;I;[Source:NCBI;gene;(formerly;Entrezgene);Acc:103225202]
ENSCSAT00000013501.1	3267	3109.51	220.548	314	cdna;chromosome:ChlSab1.1:8:36427110:36485508:-1;gene:ENSCSAG00000015409.1;gene_biotype:protein_coding;transcript_biotype:protein_coding;gene_symbol:FGFR1;description:fibroblast;growth;factor;receptor;1;[Source:NCBI;gene;(formerly;Entrezgene);Acc:103215648]
ENSCSAT00000015703.1	4851	4693.51	219.174	471	cdna;chromosome:ChlSab1.1:28:19037395:19072458:1;gene:ENSCSAG00000017609.1;gene_biotype:protein_coding;transcript_biotype:protein_coding;gene_symbol:TTYH3;description:tweety;family;member;3;[Source:NCBI;gene;(formerly;Entrezgene);Acc:103246863]
ENSCSAT00000019459.1	186	53.679	218.761	5.377	cdna;chromosome:ChlSab1.1:25:71224194:71224379:-1;gene:ENSCSAG00000019369.1;gene_biotype:protein_coding;transcript_biotype:protein_coding
ENSCSAT00000019498.1	687	529.574	218.583	53	cdna;chromosome:ChlSab1.1:24:26949388:26950074:1;gene:ENSCSAG00000019408.1;gene_biotype:protein_coding;transcript_biotype:protein_coding;gene_symbol:ARF6;description:ADP;ribosylation;factor;6;[Source:NCBI;gene;(formerly;Entrezgene);Acc:103228947]
ENSCSAT00000018737.1	357	200.061	218.34	20	cdna;chromosome:ChlSab1.1:10:43789334:43789690:1;gene:ENSCSAG00000018647.1;gene_biotype:protein_coding;transcript_biotype:protein_coding;description:D-dopachrome;decarboxylase;[Source:NCBI;gene;(formerly;Entrezgene);Acc:103217148]
ENSCSAT00000007760.1	1218	1060.51	218.301	106	cdna;chromosome:ChlSab1.1:23:73555260:73575925:1;gene:ENSCSAG00000009697.1;gene_biotype:protein_coding;transcript_biotype:protein_coding;gene_symbol:NPM1;description:nucleophosmin;1;[Source:NCBI;gene;(formerly;Entrezgene);Acc:103244967]
ENSCSAT00000003217.1	4896	4738.51	218.015	473	cdna;chromosome:ChlSab1.1:11:52222724:52253307:-1;gene:ENSCSAG00000005183.1;gene_biotype:protein_coding;transcript_biotype:protein_coding;gene_symbol:CS;description:citrate;synthase;[Source:NCBI;gene;(formerly;Entrezgene);Acc:103238519]
ENSCSAT00000017624.1	709	551.574	217.784	55	cdna;chromosome:ChlSab1.1:20:110569352:110582562:-1;gene:ENSCSAG00000000909.1;gene_biotype:protein_coding;transcript_biotype:protein_coding;gene_symbol:CDC42;description:cell;division;cycle;42;[Source:NCBI;gene;(formerly;Entrezgene);Acc:103225423]
ENSCSAT00000006087.1	469	311.684	217.227	31	cdna;chromosome:ChlSab1.1:6:7675843:7684584:-1;gene:ENSCSAG00000008039.1;gene_biotype:protein_coding;transcript_biotype:protein_coding
ENSCSAT00000011100.1	3016	2858.51	216.228	283	cdna;chromosome:ChlSab1.1:6:309506:321785:1;gene:ENSCSAG00000013009.1;gene_biotype:protein_coding;transcript_biotype:protein_coding;gene_symbol:BSG;description:basigin;(Ok;blood;group);[Source:NCBI;gene;(formerly;Entrezgene);Acc:103233583]
ENSCSAT00000014209.1	1107	949.514	216.219	94	cdna;chromosome:ChlSab1.1:14:21746044:21761322:1;gene:ENSCSAG00000016141.1;gene_biotype:protein_coding;transcript_biotype:protein_coding;gene_symbol:CAPG;description:capping;actin;protein,;gelsolin;like;[Source:NCBI;gene;(formerly;Entrezgene);Acc:103219957]
ENSCSAT00000014473.1	1765	1607.51	216.028	159	cdna;chromosome:ChlSab1.1:2:713522:724859:1;gene:ENSCSAG00000016381.1;gene_biotype:protein_coding;transcript_biotype:protein_coding;gene_symbol:EEF1A2;description:eukaryotic;translation;elongation;factor;1;alpha;2;[Source:NCBI;gene;(formerly;Entrezgene);Acc:103242670]
ENSCSAT00000000551.1	2359	2201.51	215.267	216.986	cdna;chromosome:ChlSab1.1:6:42677690:42682759:1;gene:ENSCSAG00000002534.1;gene_biotype:protein_coding;transcript_biotype:protein_coding;gene_symbol:RPS11;description:ribosomal;protein;S11;[Source:NCBI;gene;(formerly;Entrezgene);Acc:103235041]
ENSCSAT00000015949.1	614	456.594	215.253	45	cdna;chromosome:ChlSab1.1:28:12916148:12923609:-1;gene:ENSCSAG00000017853.1;gene_biotype:protein_coding;transcript_biotype:protein_coding;gene_symbol:LAMTOR4;description:late;endosomal/lysosomal;adaptor,;MAPK;and;MTOR;activator;4;[Source:NCBI;gene;(formerly;Entrezgene);Acc:103246750]
ENSCSAT00000013698.1	8147	7989.51	214.32	784	cdna;chromosome:ChlSab1.1:12:3301175:3459607:-1;gene:ENSCSAG00000015604.1;gene_biotype:protein_coding;transcript_biotype:protein_coding;gene_symbol:COL5A1;description:collagen;type;V;alpha;1;chain;[Source:NCBI;gene;(formerly;Entrezgene);Acc:103239664]
ENSCSAT00000011791.1	3130	2972.51	213.814	291	cdna;chromosome:ChlSab1.1:15:5110989:5121099:-1;gene:ENSCSAG00000013695.1;gene_biotype:protein_coding;transcript_biotype:protein_coding;gene_symbol:PSMD2;description:proteasome;26S;subunit,;non-ATPase;2;[Source:NCBI;gene;(formerly;Entrezgene);Acc:103221134]
ENSCSAT00000016111.1	1110	952.514	213.245	93	cdna;chromosome:ChlSab1.1:28:12008853:12011653:1;gene:ENSCSAG00000018014.1;gene_biotype:protein_coding;transcript_biotype:protein_coding;gene_symbol:NAT16;description:N-acetyltransferase;16;(putative);[Source:HGNC;Symbol;Acc:HGNC:22030]
ENSCSAT00000004949.1	1342	1184.51	212.043	115	cdna;chromosome:ChlSab1.1:19:20563042:20594475:1;gene:ENSCSAG00000006903.1;gene_biotype:protein_coding;transcript_biotype:protein_coding
ENSCSAT00000015796.1	1674	1516.51	211.708	147	cdna;chromosome:ChlSab1.1:28:15672442:15694148:-1;gene:ENSCSAG00000017700.1;gene_biotype:protein_coding;transcript_biotype:protein_coding;gene_symbol:KDELR2;description:KDEL;endoplasmic;reticulum;protein;retention;receptor;2;[Source:NCBI;gene;(formerly;Entrezgene);Acc:103246817]
ENSCSAT00000005605.1	694	536.574	211.661	52	cdna;chromosome:ChlSab1.1:1:9213123:9219927:-1;gene:ENSCSAG00000007569.1;gene_biotype:protein_coding;transcript_biotype:protein_coding;gene_symbol:ARL2;description:ADP;ribosylation;factor;like;GTPase;2;[Source:NCBI;gene;(formerly;Entrezgene);Acc:103232014]
ENSCSAT00000017703.1	2522	2364.51	211.524	229	cdna;chromosome:ChlSab1.1:20:116843218:116863010:-1;gene:ENSCSAG00000000830.1;gene_biotype:protein_coding;transcript_biotype:protein_coding;gene_symbol:EFHD2;description:EF-hand;domain;family;member;D2;[Source:NCBI;gene;(formerly;Entrezgene);Acc:103225553]
ENSCSAT00000004263.1	1336	1178.51	211.27	114	cdna;chromosome:ChlSab1.1:11:45178111:45196858:-1;gene:ENSCSAG00000006224.1;gene_biotype:protein_coding;transcript_biotype:protein_coding;gene_symbol:ARF3;description:ADP;ribosylation;factor;3;[Source:NCBI;gene;(formerly;Entrezgene);Acc:103238249]
ENSCSAT00000017626.1	14247	14089.5	210.509	1358	cdna;chromosome:ChlSab1.1:20:110693854:110809466:1;gene:ENSCSAG00000000907.1;gene_biotype:protein_coding;transcript_biotype:protein_coding;gene_symbol:HSPG2;description:heparan;sulfate;proteoglycan;2;[Source:NCBI;gene;(formerly;Entrezgene);Acc:103225428]
ENSCSAT00000004049.1	2566	2408.51	210.381	232	cdna;chromosome:ChlSab1.1:22:81974141:82062160:1;gene:ENSCSAG00000006012.1;gene_biotype:protein_coding;transcript_biotype:protein_coding;gene_symbol:DCBLD2;description:discoidin,;CUB;and;LCCL;domain;containing;2;[Source:NCBI;gene;(formerly;Entrezgene);Acc:103228471]
ENSCSAT00000007361.1	417	259.748	210.211	25	cdna;chromosome:ChlSab1.1:14:80839335:80846608:-1;gene:ENSCSAG00000009296.1;gene_biotype:protein_coding;transcript_biotype:protein_coding;gene_symbol:CENPA;description:centromere;protein;A;[Source:NCBI;gene;(formerly;Entrezgene);Acc:103220625]
ENSCSAT00000012900.1	725	567.57	210.197	54.623	cdna;chromosome:ChlSab1.1:4:80255364:80258473:-1;gene:ENSCSAG00000014810.1;gene_biotype:protein_coding;transcript_biotype:protein_coding
ENSCSAT00000004623.1	2911	2753.51	210.196	265	cdna;chromosome:ChlSab1.1:11:44003736:44039902:-1;gene:ENSCSAG00000006584.1;gene_biotype:protein_coding;transcript_biotype:protein_coding;gene_symbol:HDAC7;description:histone;deacetylase;7;[Source:NCBI;gene;(formerly;Entrezgene);Acc:103238208]
ENSCSAT00000011126.1	969	811.516	209.925	78	cdna;chromosome:ChlSab1.1:16:4272081:4274555:1;gene:ENSCSAG00000013029.1;gene_biotype:protein_coding;transcript_biotype:protein_coding;gene_symbol:PSMB6;description:proteasome;20S;subunit;beta;6;[Source:HGNC;Symbol;Acc:HGNC:9543]
ENSCSAT00000000208.1	3804	3646.51	209.033	349	cdna;chromosome:ChlSab1.1:1:121150291:121224534:1;gene:ENSCSAG00000002191.1;gene_biotype:protein_coding;transcript_biotype:protein_coding;gene_symbol:APLP2;description:amyloid;beta;precursor;like;protein;2;[Source:NCBI;gene;(formerly;Entrezgene);Acc:103248831]
ENSCSAT00000015669.1	471	313.682	208.88	30	cdna;chromosome:ChlSab1.1:28:20060001:20061170:-1;gene:ENSCSAG00000017576.1;gene_biotype:protein_coding;transcript_biotype:protein_coding;gene_symbol:MAFK;description:MAF;bZIP;transcription;factor;K;[Source:NCBI;gene;(formerly;Entrezgene);Acc:103246880]
ENSCSAT00000018620.1	540	382.634	207.587	36.368	cdna;chromosome:ChlSab1.1:8:30326106:30326645:-1;gene:ENSCSAG00000018530.1;gene_biotype:protein_coding;transcript_biotype:protein_coding;description:ubiquitin;conjugating;enzyme;E2;C;[Source:NCBI;gene;(formerly;Entrezgene);Acc:103245263]
ENSCSAT00000008015.1	357	200.061	207.423	19	cdna;chromosome:ChlSab1.1:6:5335730:5338432:-1;gene:ENSCSAG00000009934.1;gene_biotype:protein_coding;transcript_biotype:protein_coding;gene_symbol:MICOS13;description:mitochondrial;contact;site;and;cristae;organizing;system;subunit;13;[Source:NCBI;gene;(formerly;Entrezgene);Acc:103233742]
ENSCSAT00000015687.1	2447	2289.51	207.006	217	cdna;chromosome:ChlSab1.1:28:19222328:19245969:-1;gene:ENSCSAG00000017603.1;gene_biotype:protein_coding;transcript_biotype:protein_coding;gene_symbol:EIF3B;description:eukaryotic;translation;initiation;factor;3;subunit;B;[Source:HGNC;Symbol;Acc:HGNC:3280]
ENSCSAT00000009383.1	5805	5647.51	206.901	535	cdna;chromosome:ChlSab1.1:21:76829443:76914324:-1;gene:ENSCSAG00000011295.1;gene_biotype:protein_coding;transcript_biotype:protein_coding;gene_symbol:LAMB1;description:laminin;subunit;beta;1;[Source:NCBI;gene;(formerly;Entrezgene);Acc:103226726]
ENSCSAT00000006836.1	3792	3634.51	206.718	344	cdna;chromosome:ChlSab1.1:17:40228938:40245287:1;gene:ENSCSAG00000008784.1;gene_biotype:protein_coding;transcript_biotype:protein_coding;gene_symbol:VARS1;description:valyl-tRNA;synthetase;1;[Source:NCBI;gene;(formerly;Entrezgene);Acc:103221747]
ENSCSAT00000015165.1	3506	3348.51	205.376	314.873	cdna;chromosome:ChlSab1.1:14:8990861:9069227:-1;gene:ENSCSAG00000017069.1;gene_biotype:protein_coding;transcript_biotype:protein_coding;gene_symbol:FHL2;description:four;and;a;half;LIM;domains;2;[Source:NCBI;gene;(formerly;Entrezgene);Acc:103241187]
ENSCSAT00000007924.1	3384	3226.51	205.105	303	cdna;chromosome:ChlSab1.1:8:127667981:127719011:-1;gene:ENSCSAG00000009841.1;gene_biotype:protein_coding;transcript_biotype:protein_coding;gene_symbol:NDRG1;description:N-myc;downstream;regulated;1;[Source:NCBI;gene;(formerly;Entrezgene);Acc:103237472]
ENSCSAT00000003107.1	669	511.574	204.927	48	cdna;chromosome:ChlSab1.1:6:17976547:17994968:1;gene:ENSCSAG00000005084.1;gene_biotype:protein_coding;transcript_biotype:protein_coding
ENSCSAT00000001688.1	2400	2242.51	204.527	210	cdna;chromosome:ChlSab1.1:16:61277917:61300303:1;gene:ENSCSAG00000003668.1;gene_biotype:protein_coding;transcript_biotype:protein_coding;gene_symbol:PLCD3;description:phospholipase;C;delta;3;[Source:NCBI;gene;(formerly;Entrezgene);Acc:103243297]
ENSCSAT00000008293.1	3909	3751.51	204.347	351	cdna;chromosome:ChlSab1.1:11:6900787:6906787:1;gene:ENSCSAG00000010202.1;gene_biotype:protein_coding;transcript_biotype:protein_coding;gene_symbol:TPI1;description:triosephosphate;isomerase;1;[Source:NCBI;gene;(formerly;Entrezgene);Acc:103218483]
ENSCSAT00000002725.1	2573	2415.51	204.346	226	cdna;chromosome:ChlSab1.1:5:44645602:44670918:-1;gene:ENSCSAG00000004695.1;gene_biotype:protein_coding;transcript_biotype:protein_coding;gene_symbol:GOT2;description:glutamic-oxaloacetic;transaminase;2;[Source:NCBI;gene;(formerly;Entrezgene);Acc:103233093]
ENSCSAT00000010233.1	1285	1127.51	203.392	105	cdna;chromosome:ChlSab1.1:2:38271924:38358379:1;gene:ENSCSAG00000012199.1;gene_biotype:protein_coding;transcript_biotype:protein_coding;gene_symbol:RALY;description:RALY;heterogeneous;nuclear;ribonucleoprotein;[Source:NCBI;gene;(formerly;Entrezgene);Acc:103248654]
ENSCSAT00000016058.1	2252	2094.51	203.338	195	cdna;chromosome:ChlSab1.1:3:8527273:8606402:-1;gene:ENSCSAG00000017961.1;gene_biotype:protein_coding;transcript_biotype:protein_coding;gene_symbol:SLC7A1;description:solute;carrier;family;7;member;1;[Source:NCBI;gene;(formerly;Entrezgene);Acc:103214212]
ENSCSAT00000019195.1	1425	1267.51	203.327	118	cdna;chromosome:ChlSab1.1:17:50609356:50610780:-1;gene:ENSCSAG00000019105.1;gene_biotype:protein_coding;transcript_biotype:protein_coding;gene_symbol:SOX4;description:SRY-box;transcription;factor;4;[Source:NCBI;gene;(formerly;Entrezgene);Acc:103222078]
ENSCSAT00000012306.1	931	773.518	203.296	72	cdna;chromosome:ChlSab1.1:2:18906666:18927374:-1;gene:ENSCSAG00000014209.1;gene_biotype:protein_coding;transcript_biotype:protein_coding;gene_symbol:YWHAB;description:tyrosine;3-monooxygenase/tryptophan;5-monooxygenase;activation;protein;beta;[Source:NCBI;gene;(formerly;Entrezgene);Acc:103245470]
ENSCSAT00000017916.1	663	505.574	203.039	47	cdna;chromosome:ChlSab1.1:1:66644912:66645574:1;gene:ENSCSAG00000000619.1;gene_biotype:protein_coding;transcript_biotype:protein_coding
ENSCSAT00000007791.1	827	669.545	202.245	62	cdna;chromosome:ChlSab1.1:24:82689254:82695146:1;gene:ENSCSAG00000009707.1;gene_biotype:protein_coding;transcript_biotype:protein_coding;gene_symbol:SIVA1;description:SIVA1;apoptosis;inducing;factor;[Source:NCBI;gene;(formerly;Entrezgene);Acc:103229782]
ENSCSAT00000001074.1	2700	2542.51	201.87	235	cdna;chromosome:ChlSab1.1:16:64333207:64373230:1;gene:ENSCSAG00000003049.1;gene_biotype:protein_coding;transcript_biotype:protein_coding;gene_symbol:ACLY;description:ATP;citrate;lyase;[Source:HGNC;Symbol;Acc:HGNC:115]
ENSCSAT00000017963.1	330	173.434	201.489	16	cdna;chromosome:ChlSab1.1:16:3171766:3172095:1;gene:ENSCSAG00000000572.1;gene_biotype:protein_coding;transcript_biotype:protein_coding;gene_symbol:EMC6;description:ER;membrane;protein;complex;subunit;6;[Source:NCBI;gene;(formerly;Entrezgene);Acc:103242163]
ENSCSAT00000011689.1	526	368.642	201.438	34	cdna;chromosome:ChlSab1.1:X:44828841:44835985:-1;gene:ENSCSAG00000013599.1;gene_biotype:protein_coding;transcript_biotype:protein_coding;gene_symbol:UXT;description:ubiquitously;expressed;prefoldin;like;chaperone;[Source:HGNC;Symbol;Acc:HGNC:12641]
ENSCSAT00000000085.1	342	185.256	200.421	17	cdna;chromosome:ChlSab1.1:6:43846561:43847297:-1;gene:ENSCSAG00000002070.1;gene_biotype:protein_coding;transcript_biotype:protein_coding
ENSCSAT00000006697.1	1803	1645.51	200.421	151	cdna;chromosome:ChlSab1.1:8:138503831:138529165:1;gene:ENSCSAG00000008638.1;gene_biotype:protein_coding;transcript_biotype:protein_coding;gene_symbol:HSF1;description:heat;shock;transcription;factor;1;[Source:NCBI;gene;(formerly;Entrezgene);Acc:103237617]
ENSCSAT00000009515.1	309	152.993	199.859	14	cdna;chromosome:ChlSab1.1:10:83017949:83020685:1;gene:ENSCSAG00000011427.1;gene_biotype:protein_coding;transcript_biotype:protein_coding;description:MOB;family;member;4,;phocein;[Source:NCBI;gene;(formerly;Entrezgene);Acc:103217585]
ENSCSAT00000016249.1	2107	1949.51	198.296	177	cdna;chromosome:ChlSab1.1:28:10126901:10135061:1;gene:ENSCSAG00000018153.1;gene_biotype:protein_coding;transcript_biotype:protein_coding;gene_symbol:RHBDD2;description:rhomboid;domain;containing;2;[Source:NCBI;gene;(formerly;Entrezgene);Acc:103246653]
ENSCSAT00000000108.1	1303	1145.51	198.29	104	cdna;chromosome:ChlSab1.1:20:7844430:7856999:1;gene:ENSCSAG00000002090.1;gene_biotype:protein_coding;transcript_biotype:protein_coding;gene_symbol:SSR2;description:signal;sequence;receptor;subunit;2;[Source:NCBI;gene;(formerly;Entrezgene);Acc:103223863]
ENSCSAT00000019383.1	444	286.706	198.063	26	cdna;chromosome:ChlSab1.1:17:18786718:18787161:-1;gene:ENSCSAG00000019293.1;gene_biotype:protein_coding;transcript_biotype:protein_coding
ENSCSAT00000004355.1	528	370.642	197.512	33.518	cdna;chromosome:ChlSab1.1:6:13225006:13230630:-1;gene:ENSCSAG00000006318.1;gene_biotype:protein_coding;transcript_biotype:protein_coding;gene_symbol:NDUFB7;description:NADH:ubiquinone;oxidoreductase;subunit;B7;[Source:NCBI;gene;(formerly;Entrezgene);Acc:103234046]
ENSCSAT00000013788.1	1276	1118.51	197.218	101	cdna;chromosome:ChlSab1.1:14:32748909:32751776:1;gene:ENSCSAG00000015721.1;gene_biotype:protein_coding;transcript_biotype:protein_coding;gene_symbol:AUP1;description:AUP1;lipid;droplet;regulating;VLDL;assembly;factor;[Source:NCBI;gene;(formerly;Entrezgene);Acc:103220018]
ENSCSAT00000003672.1	1023	865.514	196.828	78	cdna;chromosome:ChlSab1.1:19:25173476:25199110:-1;gene:ENSCSAG00000005649.1;gene_biotype:protein_coding;transcript_biotype:protein_coding;gene_symbol:CYB5R3;description:cytochrome;b5;reductase;3;[Source:HGNC;Symbol;Acc:HGNC:2873]
ENSCSAT00000009524.1	668	510.574	196.773	46	cdna;chromosome:ChlSab1.1:5:1681228:1682151:-1;gene:ENSCSAG00000011443.1;gene_biotype:protein_coding;transcript_biotype:protein_coding;gene_symbol:MRPS34;description:mitochondrial;ribosomal;protein;S34;[Source:NCBI;gene;(formerly;Entrezgene);Acc:103226340]
ENSCSAT00000002226.1	1590	1432.51	196.679	129	cdna;chromosome:ChlSab1.1:16:53423040:53433290:-1;gene:ENSCSAG00000004208.1;gene_biotype:protein_coding;transcript_biotype:protein_coding;gene_symbol:KPNA2;description:karyopherin;subunit;alpha;2;[Source:NCBI;gene;(formerly;Entrezgene);Acc:103243153]
ENSCSAT00000009646.1	732	574.567	196.378	51.661	cdna;chromosome:ChlSab1.1:25:58948335:58949068:-1;gene:ENSCSAG00000011560.1;gene_biotype:pseudogene;transcript_biotype:pseudogene
ENSCSAT00000002605.1	825	667.545	196.308	60	cdna;chromosome:ChlSab1.1:11:53736699:53742750:-1;gene:ENSCSAG00000004582.1;gene_biotype:protein_coding;transcript_biotype:protein_coding;gene_symbol:CTDSP2;description:CTD;small;phosphatase;2;[Source:HGNC;Symbol;Acc:HGNC:17077]
ENSCSAT00000010172.1	625	467.594	196.176	42	cdna;chromosome:ChlSab1.1:2:38825574:38839903:1;gene:ENSCSAG00000012088.1;gene_biotype:protein_coding;transcript_biotype:protein_coding;gene_symbol:DYNLRB1;description:dynein;light;chain;roadblock-type;1;[Source:HGNC;Symbol;Acc:HGNC:15468]
ENSCSAT00000006944.1	1930	1772.51	195.918	159	cdna;chromosome:ChlSab1.1:8:138034395:138042468:-1;gene:ENSCSAG00000008878.1;gene_biotype:protein_coding;transcript_biotype:protein_coding;gene_symbol:PUF60;description:poly(U);binding;splicing;factor;60;[Source:NCBI;gene;(formerly;Entrezgene);Acc:103237588]
ENSCSAT00000007100.1	1218	1060.51	195.647	95	cdna;chromosome:ChlSab1.1:16:12835338:12935627:-1;gene:ENSCSAG00000009036.1;gene_biotype:protein_coding;transcript_biotype:protein_coding;gene_symbol:HS3ST3A1;description:heparan;sulfate-glucosamine;3-sulfotransferase;3A1;[Source:NCBI;gene;(formerly;Entrezgene);Acc:103242411]
ENSCSAT00000013541.1	750	592.561	195.348	53	cdna;chromosome:ChlSab1.1:21:14717648:14720645:1;gene:ENSCSAG00000015447.1;gene_biotype:protein_coding;transcript_biotype:protein_coding;gene_symbol:MRPS24;description:mitochondrial;ribosomal;protein;S24;[Source:HGNC;Symbol;Acc:HGNC:14510]
ENSCSAT00000013450.1	1959	1801.51	195.189	161	cdna;chromosome:ChlSab1.1:14:34057878:34091692:1;gene:ENSCSAG00000015359.1;gene_biotype:protein_coding;transcript_biotype:protein_coding;description:RAB11;family;interacting;protein;5;[Source:NCBI;gene;(formerly;Entrezgene);Acc:103220061]
ENSCSAT00000014224.1	426	268.73	195.057	24	cdna;chromosome:ChlSab1.1:21:2753284:2757008:1;gene:ENSCSAG00000016127.1;gene_biotype:protein_coding;transcript_biotype:protein_coding;gene_symbol:PSPH;description:phosphoserine;phosphatase;[Source:HGNC;Symbol;Acc:HGNC:9577]
ENSCSAT00000015300.1	2558	2400.51	194.705	214	cdna;chromosome:ChlSab1.1:4:30457718:30592105:1;gene:ENSCSAG00000017206.1;gene_biotype:protein_coding;transcript_biotype:protein_coding;gene_symbol:CDH6;description:cadherin;6;[Source:NCBI;gene;(formerly;Entrezgene);Acc:103215082]
ENSCSAT00000007667.1	861	703.541	194.548	62.669	cdna;chromosome:ChlSab1.1:17:38648140:38649810:1;gene:ENSCSAG00000009582.1;gene_biotype:protein_coding;transcript_biotype:protein_coding;gene_symbol:CUTA;description:cutA;divalent;cation;tolerance;homolog;[Source:NCBI;gene;(formerly;Entrezgene);Acc:103221658]
ENSCSAT00000012167.1	2653	2495.51	194.294	222	cdna;chromosome:ChlSab1.1:26:9538758:9564751:-1;gene:ENSCSAG00000014080.1;gene_biotype:protein_coding;transcript_biotype:protein_coding;gene_symbol:LOXL1;description:lysyl;oxidase;like;1;[Source:NCBI;gene;(formerly;Entrezgene);Acc:103245351]
ENSCSAT00000005347.1	5774	5616.51	194.044	499	cdna;chromosome:ChlSab1.1:9:72469323:72789167:-1;gene:ENSCSAG00000007305.1;gene_biotype:protein_coding;transcript_biotype:protein_coding;gene_symbol:BICC1;description:BicC;family;RNA;binding;protein;1;[Source:NCBI;gene;(formerly;Entrezgene);Acc:103216164]
ENSCSAT00000003364.1	2828	2670.51	194.008	237.219	cdna;chromosome:ChlSab1.1:6:17040064:17045737:1;gene:ENSCSAG00000005332.1;gene_biotype:protein_coding;transcript_biotype:protein_coding;gene_symbol:UBA52;description:ubiquitin;A-52;residue;ribosomal;protein;fusion;product;1;[Source:NCBI;gene;(formerly;Entrezgene);Acc:103234186]
ENSCSAT00000019329.1	553	395.624	193.22	35	cdna;chromosome:ChlSab1.1:11:14673924:14674476:1;gene:ENSCSAG00000019239.1;gene_biotype:protein_coding;transcript_biotype:protein_coding;gene_symbol:H2AJ;description:H2A;histone;family;member;J;[Source:NCBI;gene;(formerly;Entrezgene);Acc:103218675]
ENSCSAT00000009451.1	1028	870.514	193.189	77	cdna;chromosome:ChlSab1.1:X:61095907:61110692:1;gene:ENSCSAG00000011364.1;gene_biotype:protein_coding;transcript_biotype:protein_coding
ENSCSAT00000005711.1	2049	1891.51	192.83	167	cdna;chromosome:ChlSab1.1:1:9106252:9109304:1;gene:ENSCSAG00000007657.1;gene_biotype:protein_coding;transcript_biotype:protein_coding;gene_symbol:FAU;description:FAU;ubiquitin;like;and;ribosomal;protein;S30;fusion;[Source:NCBI;gene;(formerly;Entrezgene);Acc:103230749]
ENSCSAT00000015047.1	1282	1124.51	192.281	99	cdna;chromosome:ChlSab1.1:8:7246013:7268854:1;gene:ENSCSAG00000016950.1;gene_biotype:protein_coding;transcript_biotype:protein_coding;gene_symbol:CTSB;description:cathepsin;B;[Source:NCBI;gene;(formerly;Entrezgene);Acc:103215319]
ENSCSAT00000004431.1	2931	2773.51	192.144	244	cdna;chromosome:ChlSab1.1:5:25794903:25854121:-1;gene:ENSCSAG00000006395.1;gene_biotype:protein_coding;transcript_biotype:protein_coding;gene_symbol:XPO6;description:exportin;6;[Source:HGNC;Symbol;Acc:HGNC:19733]
ENSCSAT00000006567.1	1386	1228.51	192.004	108	cdna;chromosome:ChlSab1.1:17:40447061:40456826:1;gene:ENSCSAG00000008517.1;gene_biotype:protein_coding;transcript_biotype:protein_coding;gene_symbol:DDX39B;description:DExD-box;helicase;39B;[Source:HGNC;Symbol;Acc:HGNC:13917]
ENSCSAT00000018712.1	978	820.515	191.652	72	cdna;chromosome:ChlSab1.1:3:55972438:55973415:-1;gene:ENSCSAG00000018622.1;gene_biotype:protein_coding;transcript_biotype:protein_coding;gene_symbol:KCTD12;description:potassium;channel;tetramerization;domain;containing;12;[Source:NCBI;gene;(formerly;Entrezgene);Acc:103214593]
ENSCSAT00000001743.1	2148	1990.51	190.92	174	cdna;chromosome:ChlSab1.1:7:68940304:68970811:-1;gene:ENSCSAG00000003714.1;gene_biotype:protein_coding;transcript_biotype:protein_coding;gene_symbol:ANXA5;description:annexin;A5;[Source:NCBI;gene;(formerly;Entrezgene);Acc:103236196]
ENSCSAT00000003290.1	1543	1385.51	190.74	121	cdna;chromosome:ChlSab1.1:6:17354508:17375922:-1;gene:ENSCSAG00000005262.1;gene_biotype:protein_coding;transcript_biotype:protein_coding;gene_symbol:COPE;description:COPI;coat;complex;subunit;epsilon;[Source:NCBI;gene;(formerly;Entrezgene);Acc:103234198]
ENSCSAT00000013630.1	1429	1271.51	190.664	111	cdna;chromosome:ChlSab1.1:21:14545986:14553217:1;gene:ENSCSAG00000015565.1;gene_biotype:protein_coding;transcript_biotype:protein_coding;gene_symbol:POLD2;description:DNA;polymerase;delta;2,;accessory;subunit;[Source:NCBI;gene;(formerly;Entrezgene);Acc:103226140]
ENSCSAT00000004863.1	616	458.594	190.501	40	cdna;chromosome:ChlSab1.1:6:10276364:10279534:-1;gene:ENSCSAG00000006818.1;gene_biotype:protein_coding;transcript_biotype:protein_coding;gene_symbol:TMEM205;description:transmembrane;protein;205;[Source:NCBI;gene;(formerly;Entrezgene);Acc:103233925]
ENSCSAT00000011944.1	1272	1114.51	190.087	97	cdna;chromosome:ChlSab1.1:26:10770677:10771950:1;gene:ENSCSAG00000013854.1;gene_biotype:pseudogene;transcript_biotype:pseudogene
ENSCSAT00000006044.1	732	574.567	190.062	50	cdna;chromosome:ChlSab1.1:2:86950056:86964579:-1;gene:ENSCSAG00000008019.1;gene_biotype:protein_coding;transcript_biotype:protein_coding;description:U2;small;nuclear;RNA;auxiliary;factor;1;[Source:NCBI;gene;(formerly;Entrezgene);Acc:103219520]
ENSCSAT00000016629.1	847	689.542	190.045	60	cdna;chromosome:ChlSab1.1:20:9829085:9838819:1;gene:ENSCSAG00000001901.1;gene_biotype:protein_coding;transcript_biotype:protein_coding;gene_symbol:JTB;description:jumping;translocation;breakpoint;[Source:NCBI;gene;(formerly;Entrezgene);Acc:103223937]
ENSCSAT00000015464.1	6544	6386.51	189.8	555	cdna;chromosome:ChlSab1.1:14:694126:724208:-1;gene:ENSCSAG00000017369.1;gene_biotype:protein_coding;transcript_biotype:protein_coding;gene_symbol:SNRNP200;description:small;nuclear;ribonucleoprotein;U5;subunit;200;[Source:NCBI;gene;(formerly;Entrezgene);Acc:103241068]
ENSCSAT00000006842.1	3118	2960.51	189.598	257	cdna;chromosome:ChlSab1.1:23:79467647:79484592:-1;gene:ENSCSAG00000008773.1;gene_biotype:protein_coding;transcript_biotype:protein_coding;gene_symbol:DBN1;description:drebrin;1;[Source:NCBI;gene;(formerly;Entrezgene);Acc:103245057]
ENSCSAT00000004146.1	2640	2482.51	189.153	215	cdna;chromosome:ChlSab1.1:5:26842746:26846861:-1;gene:ENSCSAG00000006110.1;gene_biotype:protein_coding;transcript_biotype:protein_coding;gene_symbol:MAZ;description:MYC;associated;zinc;finger;protein;[Source:HGNC;Symbol;Acc:HGNC:6914]
ENSCSAT00000018393.1	471	313.682	188.924	27.134	cdna;chromosome:ChlSab1.1:20:85769667:85770137:-1;gene:ENSCSAG00000000142.1;gene_biotype:protein_coding;transcript_biotype:protein_coding
ENSCSAT00000017881.1	252	100.772	188.896	8.716	cdna;chromosome:ChlSab1.1:20:104576560:104576811:-1;gene:ENSCSAG00000000654.1;gene_biotype:protein_coding;transcript_biotype:protein_coding
ENSCSAT00000012183.1	1303	1145.51	188.756	99	cdna;chromosome:ChlSab1.1:14:51876514:51898506:1;gene:ENSCSAG00000014089.1;gene_biotype:protein_coding;transcript_biotype:protein_coding
ENSCSAT00000009914.1	4851	4693.51	188.562	405.215	cdna;chromosome:ChlSab1.1:16:6686667:6694095:1;gene:ENSCSAG00000011825.1;gene_biotype:protein_coding;transcript_biotype:protein_coding;description:eukaryotic;translation;initiation;factor;5A;[Source:NCBI;gene;(formerly;Entrezgene);Acc:103242289]
ENSCSAT00000005030.1	2208	2050.51	188.529	177	cdna;chromosome:ChlSab1.1:6:9672453:9686793:1;gene:ENSCSAG00000006983.1;gene_biotype:protein_coding;transcript_biotype:protein_coding;gene_symbol:ILF3;description:interleukin;enhancer;binding;factor;3;[Source:NCBI;gene;(formerly;Entrezgene);Acc:103233909]
ENSCSAT00000012303.1	981	823.515	188.301	71	cdna;chromosome:ChlSab1.1:16:543561:565576:-1;gene:ENSCSAG00000014227.1;gene_biotype:protein_coding;transcript_biotype:protein_coding;gene_symbol:NXN;description:nucleoredoxin;[Source:HGNC;Symbol;Acc:HGNC:18008]
ENSCSAT00000006036.1	738	580.567	188.182	50.022	cdna;chromosome:ChlSab1.1:1:8526788:8528027:1;gene:ENSCSAG00000007985.1;gene_biotype:protein_coding;transcript_biotype:protein_coding;gene_symbol:RNASEH2C;description:ribonuclease;H2;subunit;C;[Source:NCBI;gene;(formerly;Entrezgene);Acc:103227177]
ENSCSAT00000003222.1	3286	3128.51	187.096	268	cdna;chromosome:ChlSab1.1:11:52197178:52216362:-1;gene:ENSCSAG00000005189.1;gene_biotype:protein_coding;transcript_biotype:protein_coding;gene_symbol:ANKRD52;description:ankyrin;repeat;domain;52;[Source:NCBI;gene;(formerly;Entrezgene);Acc:103238514]
ENSCSAT00000013365.1	508	350.651	186.858	30	cdna;chromosome:ChlSab1.1:24:26658519:26660418:-1;gene:ENSCSAG00000015268.1;gene_biotype:protein_coding;transcript_biotype:protein_coding;description:60S;ribosomal;protein;L36a;[Source:NCBI;gene;(formerly;Entrezgene);Acc:103231084]
ENSCSAT00000014547.1	2227	2069.51	186.798	177	cdna;chromosome:ChlSab1.1:10:16909594:16940201:-1;gene:ENSCSAG00000016451.1;gene_biotype:protein_coding;transcript_biotype:protein_coding;gene_symbol:LYPD1;description:LY6/PLAUR;domain;containing;1;[Source:HGNC;Symbol;Acc:HGNC:28431]
ENSCSAT00000017876.1	813	655.545	186.574	56	cdna;chromosome:ChlSab1.1:20:98102413:98103225:-1;gene:ENSCSAG00000000659.1;gene_biotype:protein_coding;transcript_biotype:protein_coding;gene_symbol:GJB3;description:gap;junction;protein;beta;3;[Source:NCBI;gene;(formerly;Entrezgene);Acc:103225148]
ENSCSAT00000002045.1	1991	1833.51	185.826	156	cdna;chromosome:ChlSab1.1:16:56767186:56773464:1;gene:ENSCSAG00000004022.1;gene_biotype:protein_coding;transcript_biotype:protein_coding;gene_symbol:DDX5;description:DEAD-box;helicase;5;[Source:NCBI;gene;(formerly;Entrezgene);Acc:103243195]
ENSCSAT00000003446.1	628	470.592	185.645	40	cdna;chromosome:ChlSab1.1:11:50441026:50467199:1;gene:ENSCSAG00000005421.1;gene_biotype:protein_coding;transcript_biotype:protein_coding;gene_symbol:COPZ1;description:COPI;coat;complex;subunit;zeta;1;[Source:HGNC;Symbol;Acc:HGNC:2243]
ENSCSAT00000008339.1	417	259.748	184.985	22	cdna;chromosome:ChlSab1.1:5:2766170:2767248:-1;gene:ENSCSAG00000010254.1;gene_biotype:protein_coding;transcript_biotype:protein_coding;gene_symbol:HCFC1R1;description:host;cell;factor;C1;regulator;1;[Source:NCBI;gene;(formerly;Entrezgene);Acc:103227118]
ENSCSAT00000010372.1	808	650.545	184.651	55	cdna;chromosome:ChlSab1.1:14:68629976:68636714:1;gene:ENSCSAG00000012296.1;gene_biotype:protein_coding;transcript_biotype:protein_coding;gene_symbol:SRSF7;description:serine;and;arginine;rich;splicing;factor;7;[Source:HGNC;Symbol;Acc:HGNC:10789]
ENSCSAT00000003795.1	489	331.669	184.383	28	cdna;chromosome:ChlSab1.1:16:35047934:35054239:1;gene:ENSCSAG00000005761.1;gene_biotype:protein_coding;transcript_biotype:protein_coding;gene_symbol:SUPT4H1;description:SPT4;homolog,;DSIF;elongation;factor;subunit;[Source:NCBI;gene;(formerly;Entrezgene);Acc:103242846]
ENSCSAT00000007002.1	940	782.518	184.211	66	cdna;chromosome:ChlSab1.1:10:104098402:104135791:1;gene:ENSCSAG00000008943.1;gene_biotype:protein_coding;transcript_biotype:protein_coding;gene_symbol:ARPC2;description:actin;related;protein;2/3;complex;subunit;2;[Source:NCBI;gene;(formerly;Entrezgene);Acc:103217860]
ENSCSAT00000003982.1	2888	2730.51	183.971	230	cdna;chromosome:ChlSab1.1:1:15908495:15918596:1;gene:ENSCSAG00000005943.1;gene_biotype:protein_coding;transcript_biotype:protein_coding;gene_symbol:SSRP1;description:structure;specific;recognition;protein;1;[Source:NCBI;gene;(formerly;Entrezgene);Acc:103235502]
ENSCSAT00000003772.1	5359	5201.51	183.912	438	cdna;chromosome:ChlSab1.1:19:24364911:24440014:1;gene:ENSCSAG00000005734.1;gene_biotype:protein_coding;transcript_biotype:protein_coding;gene_symbol:SREBF2;description:sterol;regulatory;element;binding;transcription;factor;2;[Source:NCBI;gene;(formerly;Entrezgene);Acc:103223398]
ENSCSAT00000000505.1	830	672.543	183.545	56.519	cdna;chromosome:ChlSab1.1:11:107648325:107650068:-1;gene:ENSCSAG00000002492.1;gene_biotype:protein_coding;transcript_biotype:protein_coding
ENSCSAT00000006397.1	3324	3166.51	183.471	266	cdna;chromosome:ChlSab1.1:23:81526533:81536708:-1;gene:ENSCSAG00000008346.1;gene_biotype:protein_coding;transcript_biotype:protein_coding;gene_symbol:MGAT4B;description:alpha-1,3-mannosyl-glycoprotein;4-beta-N-acetylglucosaminyltransferase;B;[Source:NCBI;gene;(formerly;Entrezgene);Acc:103245113]
ENSCSAT00000004689.1	3114	2956.51	183.206	248	cdna;chromosome:ChlSab1.1:19:21145417:21167543:-1;gene:ENSCSAG00000006649.1;gene_biotype:protein_coding;transcript_biotype:protein_coding;gene_symbol:DDX17;description:DEAD-box;helicase;17;[Source:NCBI;gene;(formerly;Entrezgene);Acc:103223314]
ENSCSAT00000000764.1	2137	1979.51	183.154	166	cdna;chromosome:ChlSab1.1:16:66172807:66189781:-1;gene:ENSCSAG00000002748.1;gene_biotype:protein_coding;transcript_biotype:protein_coding;gene_symbol:PSMD3;description:proteasome;26S;subunit,;non-ATPase;3;[Source:NCBI;gene;(formerly;Entrezgene);Acc:103243526]
ENSCSAT00000008956.1	1351	1193.51	182.995	100	cdna;chromosome:ChlSab1.1:8:112436088:112474443:-1;gene:ENSCSAG00000010872.1;gene_biotype:protein_coding;transcript_biotype:protein_coding;gene_symbol:EXT1;description:exostosin;glycosyltransferase;1;[Source:HGNC;Symbol;Acc:HGNC:3512]
ENSCSAT00000018817.1	867	709.541	182.624	59.329	cdna;chromosome:ChlSab1.1:22:85151739:85152605:-1;gene:ENSCSAG00000018727.1;gene_biotype:protein_coding;transcript_biotype:protein_coding
ENSCSAT00000015564.1	5041	4883.51	182.471	408	cdna;chromosome:ChlSab1.1:3:88412168:88564057:-1;gene:ENSCSAG00000017470.1;gene_biotype:protein_coding;transcript_biotype:protein_coding;gene_symbol:COL4A1;description:collagen;type;IV;alpha;1;chain;[Source:NCBI;gene;(formerly;Entrezgene);Acc:103214795]
ENSCSAT00000009376.1	577	419.61	182.175	35	cdna;chromosome:ChlSab1.1:17:30373701:30375892:-1;gene:ENSCSAG00000011289.1;gene_biotype:protein_coding;transcript_biotype:protein_coding;description:translocase;of;outer;mitochondrial;membrane;6;[Source:NCBI;gene;(formerly;Entrezgene);Acc:103221508]
ENSCSAT00000008247.1	639	481.587	181.406	40	cdna;chromosome:ChlSab1.1:11:6974953:6976921:1;gene:ENSCSAG00000010169.1;gene_biotype:protein_coding;transcript_biotype:protein_coding;gene_symbol:C12orf57;description:chromosome;11;open;reading;frame,;human;C12orf57;[Source:NCBI;gene;(formerly;Entrezgene);Acc:103218490]
ENSCSAT00000017446.1	1221	1063.51	180.72	88	cdna;chromosome:ChlSab1.1:20:97232632:97270973:1;gene:ENSCSAG00000001087.1;gene_biotype:protein_coding;transcript_biotype:protein_coding;gene_symbol:PSMB2;description:proteasome;20S;subunit;beta;2;[Source:NCBI;gene;(formerly;Entrezgene);Acc:103225129]
ENSCSAT00000009584.1	1816	1658.51	180.413	137	cdna;chromosome:ChlSab1.1:15:41330904:41340385:1;gene:ENSCSAG00000011494.1;gene_biotype:protein_coding;transcript_biotype:protein_coding;gene_symbol:TM4SF1;description:transmembrane;4;L;six;family;member;1;[Source:NCBI;gene;(formerly;Entrezgene);Acc:103241498]
ENSCSAT00000017430.1	872	714.541	180.34	59	cdna;chromosome:ChlSab1.1:20:96399410:96408734:1;gene:ENSCSAG00000001103.1;gene_biotype:protein_coding;transcript_biotype:protein_coding;gene_symbol:MRPS15;description:mitochondrial;ribosomal;protein;S15;[Source:NCBI;gene;(formerly;Entrezgene);Acc:103225106]
ENSCSAT00000011728.1	4133	3975.51	180.197	328	cdna;chromosome:ChlSab1.1:12:12920710:12927431:1;gene:ENSCSAG00000013633.1;gene_biotype:protein_coding;transcript_biotype:protein_coding;gene_symbol:HSPA5;description:heat;shock;protein;family;A;(Hsp70);member;5;[Source:NCBI;gene;(formerly;Entrezgene);Acc:103239874]
ENSCSAT00000015009.1	754	596.561	179.394	49	cdna;chromosome:ChlSab1.1:10:123059:131431:-1;gene:ENSCSAG00000016915.1;gene_biotype:protein_coding;transcript_biotype:protein_coding;description:mitotic;spindle;organizing;protein;2B;[Source:NCBI;gene;(formerly;Entrezgene);Acc:103216846]
ENSCSAT00000011730.1	682	524.574	179.031	43	cdna;chromosome:ChlSab1.1:23:36962328:36978757:-1;gene:ENSCSAG00000013640.1;gene_biotype:protein_coding;transcript_biotype:protein_coding;gene_symbol:SKP1;description:S-phase;kinase;associated;protein;1;[Source:NCBI;gene;(formerly;Entrezgene);Acc:103244544]
ENSCSAT00000002908.1	988	830.515	178.825	68	cdna;chromosome:ChlSab1.1:6:24293920:24299043:-1;gene:ENSCSAG00000004876.1;gene_biotype:protein_coding;transcript_biotype:protein_coding;gene_symbol:UQCRFS1;description:cytochrome;b-c1;complex;subunit;Rieske,;mitochondrial;[Source:NCBI;gene;(formerly;Entrezgene);Acc:103234417]
ENSCSAT00000008538.1	1330	1172.51	178.822	96	cdna;chromosome:ChlSab1.1:6:4539269:4559987:-1;gene:ENSCSAG00000010458.1;gene_biotype:protein_coding;transcript_biotype:protein_coding;gene_symbol:PLIN3;description:perilipin;3;[Source:HGNC;Symbol;Acc:HGNC:16893]
ENSCSAT00000019665.1	384	226.854	178.785	18.57	cdna;chromosome:ChlSab1.1:24:55379074:55379457:-1;gene:ENSCSAG00000019575.1;gene_biotype:protein_coding;transcript_biotype:protein_coding;description:60S;ribosomal;protein;L22;[Source:NCBI;gene;(formerly;Entrezgene);Acc:103229403]
ENSCSAT00000016290.1	964	806.518	178.73	66	cdna;chromosome:ChlSab1.1:28:8879946:8903828:-1;gene:ENSCSAG00000018194.1;gene_biotype:protein_coding;transcript_biotype:protein_coding;gene_symbol:EIF4H;description:eukaryotic;translation;initiation;factor;4H;[Source:NCBI;gene;(formerly;Entrezgene);Acc:103246619]
ENSCSAT00000001722.1	5634	5476.51	178.665	448	cdna;chromosome:ChlSab1.1:5:60707006:60732882:-1;gene:ENSCSAG00000003690.1;gene_biotype:protein_coding;transcript_biotype:protein_coding;gene_symbol:BCAR1;description:BCAR1;scaffold;protein,;Cas;family;member;[Source:HGNC;Symbol;Acc:HGNC:971]
ENSCSAT00000007703.1	4283	4125.51	177.88	336	cdna;chromosome:ChlSab1.1:6:6018195:6029888:-1;gene:ENSCSAG00000009626.1;gene_biotype:protein_coding;transcript_biotype:protein_coding;gene_symbol:KHSRP;description:KH-type;splicing;regulatory;protein;[Source:NCBI;gene;(formerly;Entrezgene);Acc:103233770]
ENSCSAT00000004920.1	846	688.542	177.633	56	cdna;chromosome:ChlSab1.1:X:128221443:128225873:1;gene:ENSCSAG00000006874.1;gene_biotype:protein_coding;transcript_biotype:protein_coding;gene_symbol:SSR4;description:signal;sequence;receptor;subunit;4;[Source:HGNC;Symbol;Acc:HGNC:11326]
ENSCSAT00000010293.1	414	256.752	177.587	20.876	cdna;chromosome:ChlSab1.1:16:6371874:6373569:1;gene:ENSCSAG00000012205.1;gene_biotype:protein_coding;transcript_biotype:protein_coding;gene_symbol:RNASEK;description:ribonuclease;K;[Source:HGNC;Symbol;Acc:HGNC:33911]
ENSCSAT00000006880.1	1327	1169.51	177.413	95	cdna;chromosome:ChlSab1.1:22:51876545:51890946:1;gene:ENSCSAG00000008817.1;gene_biotype:protein_coding;transcript_biotype:protein_coding;gene_symbol:CNBP;description:CCHC-type;zinc;finger;nucleic;acid;binding;protein;[Source:NCBI;gene;(formerly;Entrezgene);Acc:103228078]
ENSCSAT00000000555.1	1600	1442.51	177.31	117.108	cdna;chromosome:ChlSab1.1:6:42666353:42671124:1;gene:ENSCSAG00000002537.1;gene_biotype:protein_coding;transcript_biotype:protein_coding
ENSCSAT00000003544.1	1563	1405.51	177.148	114	cdna;chromosome:ChlSab1.1:16:42185260:42195616:-1;gene:ENSCSAG00000005510.1;gene_biotype:protein_coding;transcript_biotype:protein_coding;gene_symbol:NME1;description:NME/NM23;nucleoside;diphosphate;kinase;1;[Source:NCBI;gene;(formerly;Entrezgene);Acc:103242912]
ENSCSAT00000000417.1	429	271.725	176.832	22	cdna;chromosome:ChlSab1.1:16:70226940:70235193:1;gene:ENSCSAG00000002402.1;gene_biotype:protein_coding;transcript_biotype:protein_coding;description:baculoviral;IAP;repeat;containing;5;[Source:NCBI;gene;(formerly;Entrezgene);Acc:103243654]
ENSCSAT00000009061.1	578	420.61	176.549	34	cdna;chromosome:ChlSab1.1:24:71901852:71903831:-1;gene:ENSCSAG00000010967.1;gene_biotype:protein_coding;transcript_biotype:protein_coding;gene_symbol:IFI27L2;description:interferon;alpha;inducible;protein;27;like;2;[Source:NCBI;gene;(formerly;Entrezgene);Acc:103229602]
ENSCSAT00000007682.1	442	284.708	176.439	23	cdna;chromosome:ChlSab1.1:19:12644235:12647096:1;gene:ENSCSAG00000009605.1;gene_biotype:protein_coding;transcript_biotype:protein_coding;gene_symbol:UQCR10;description:ubiquinol-cytochrome;c;reductase,;complex;III;subunit;X;[Source:NCBI;gene;(formerly;Entrezgene);Acc:103223148]
ENSCSAT00000000325.1	1040	882.514	175.713	71	cdna;chromosome:ChlSab1.1:11:113469956:113479129:1;gene:ENSCSAG00000002311.1;gene_biotype:protein_coding;transcript_biotype:protein_coding
ENSCSAT00000000316.1	2333	2175.51	175.688	175	cdna;chromosome:ChlSab1.1:11:114522248:114540477:1;gene:ENSCSAG00000002297.1;gene_biotype:protein_coding;transcript_biotype:protein_coding;gene_symbol:HSPB8;description:heat;shock;protein;family;B;(small);member;8;[Source:NCBI;gene;(formerly;Entrezgene);Acc:103239232]
ENSCSAT00000002457.1	5429	5271.51	175.67	424	cdna;chromosome:ChlSab1.1:11:60388883:60434233:-1;gene:ENSCSAG00000004427.1;gene_biotype:protein_coding;transcript_biotype:protein_coding;gene_symbol:GNS;description:glucosamine;(N-acetyl)-6-sulfatase;[Source:NCBI;gene;(formerly;Entrezgene);Acc:103238645]
ENSCSAT00000014563.1	4045	3887.51	175.287	312	cdna;chromosome:ChlSab1.1:8:20491284:20502626:1;gene:ENSCSAG00000016470.1;gene_biotype:protein_coding;transcript_biotype:protein_coding;gene_symbol:SLC39A14;description:solute;carrier;family;39;member;14;[Source:HGNC;Symbol;Acc:HGNC:20858]
ENSCSAT00000016811.1	2291	2133.51	175.052	171	cdna;chromosome:ChlSab1.1:20:14045346:14076177:-1;gene:ENSCSAG00000001719.1;gene_biotype:protein_coding;transcript_biotype:protein_coding;gene_symbol:PHGDH;description:phosphoglycerate;dehydrogenase;[Source:NCBI;gene;(formerly;Entrezgene);Acc:103224094]
ENSCSAT00000015467.1	981	823.515	175.041	66	cdna;chromosome:ChlSab1.1:14:673375:685228:-1;gene:ENSCSAG00000017373.1;gene_biotype:protein_coding;transcript_biotype:protein_coding;gene_symbol:TMEM127;description:transmembrane;protein;127;[Source:NCBI;gene;(formerly;Entrezgene);Acc:103241066]
ENSCSAT00000007494.1	2759	2601.51	174.624	208	cdna;chromosome:ChlSab1.1:1:3243313:3257487:1;gene:ENSCSAG00000009420.1;gene_biotype:protein_coding;transcript_biotype:protein_coding;gene_symbol:DHCR7;description:7-dehydrocholesterol;reductase;[Source:NCBI;gene;(formerly;Entrezgene);Acc:103243806]
ENSCSAT00000011625.1	971	813.516	174.508	65	cdna;chromosome:ChlSab1.1:12:13792903:13842307:-1;gene:ENSCSAG00000013531.1;gene_biotype:protein_coding;transcript_biotype:protein_coding;gene_symbol:NEK6;description:NIMA;related;kinase;6;[Source:NCBI;gene;(formerly;Entrezgene);Acc:103239890]
ENSCSAT00000002669.1	622	464.594	173.938	37	cdna;chromosome:ChlSab1.1:5:52303288:52311165:1;gene:ENSCSAG00000004645.1;gene_biotype:protein_coding;transcript_biotype:protein_coding;gene_symbol:CMTM3;description:CKLF;like;MARVEL;transmembrane;domain;containing;3;[Source:NCBI;gene;(formerly;Entrezgene);Acc:103233126]
ENSCSAT00000014553.1	1967	1809.51	173.807	144	cdna;chromosome:ChlSab1.1:25:1628751:1644499:-1;gene:ENSCSAG00000016460.1;gene_biotype:protein_coding;transcript_biotype:protein_coding;gene_symbol:ARF1;description:ADP;ribosylation;factor;1;[Source:NCBI;gene;(formerly;Entrezgene);Acc:103229966]
ENSCSAT00000002052.1	5602	5444.51	173.698	433	cdna;chromosome:ChlSab1.1:6:33290622:33374693:1;gene:ENSCSAG00000004021.1;gene_biotype:protein_coding;transcript_biotype:protein_coding;gene_symbol:ACTN4;description:actinin;alpha;4;[Source:NCBI;gene;(formerly;Entrezgene);Acc:103234638]
ENSCSAT00000003311.1	737	579.567	173.349	46	cdna;chromosome:ChlSab1.1:11:51926016:51931356:1;gene:ENSCSAG00000005277.1;gene_biotype:protein_coding;transcript_biotype:protein_coding;gene_symbol:RAB5B;description:RAB5B,;member;RAS;oncogene;family;[Source:NCBI;gene;(formerly;Entrezgene);Acc:103238494]
ENSCSAT00000017497.1	1527	1369.51	173.345	108.696	cdna;chromosome:ChlSab1.1:20:101285350:101294857:-1;gene:ENSCSAG00000001036.1;gene_biotype:protein_coding;transcript_biotype:protein_coding;gene_symbol:TINAGL1;description:tubulointerstitial;nephritis;antigen;like;1;[Source:NCBI;gene;(formerly;Entrezgene);Acc:103225221]
ENSCSAT00000015836.1	1166	1008.51	173.251	80	cdna;chromosome:ChlSab1.1:3:26149379:26177622:1;gene:ENSCSAG00000017740.1;gene_biotype:protein_coding;transcript_biotype:protein_coding;gene_symbol:ITM2B;description:integral;membrane;protein;2B;[Source:NCBI;gene;(formerly;Entrezgene);Acc:103214403]
ENSCSAT00000002080.1	4192	4034.51	173.231	320	cdna;chromosome:ChlSab1.1:1:65235775:65246450:-1;gene:ENSCSAG00000004051.1;gene_biotype:protein_coding;transcript_biotype:protein_coding;gene_symbol:UCP2;description:uncoupling;protein;2;[Source:NCBI;gene;(formerly;Entrezgene);Acc:103248025]
ENSCSAT00000017992.1	237	88.392	172.963	7	cdna;chromosome:ChlSab1.1:16:41319304:41319540:1;gene:ENSCSAG00000000543.1;gene_biotype:protein_coding;transcript_biotype:protein_coding;gene_symbol:CDC42SE1;description:CDC42;small;effector;1;[Source:NCBI;gene;(formerly;Entrezgene);Acc:103247270]
ENSCSAT00000017865.1	7410	7252.51	172.858	574	cdna;chromosome:ChlSab1.1:20:130383220:130416933:-1;gene:ENSCSAG00000000670.1;gene_biotype:protein_coding;transcript_biotype:protein_coding;gene_symbol:AGRN;description:agrin;[Source:NCBI;gene;(formerly;Entrezgene);Acc:103225827]
ENSCSAT00000006389.1	5818	5660.51	172.855	447.992	cdna;chromosome:ChlSab1.1:23:81558082:81574830:1;gene:ENSCSAG00000008334.1;gene_biotype:protein_coding;transcript_biotype:protein_coding;gene_symbol:SQSTM1;description:sequestosome;1;[Source:NCBI;gene;(formerly;Entrezgene);Acc:103245112]
ENSCSAT00000015719.1	993	835.515	172.527	66	cdna;chromosome:ChlSab1.1:28:18778847:18888922:1;gene:ENSCSAG00000017624.1;gene_biotype:protein_coding;transcript_biotype:protein_coding;gene_symbol:GNA12;description:G;protein;subunit;alpha;12;[Source:NCBI;gene;(formerly;Entrezgene);Acc:103246857]
ENSCSAT00000006437.1	2428	2270.51	172.185	179	cdna;chromosome:ChlSab1.1:23:81422693:81482332:1;gene:ENSCSAG00000008385.1;gene_biotype:protein_coding;transcript_biotype:protein_coding;gene_symbol:CANX;description:calnexin;[Source:HGNC;Symbol;Acc:HGNC:1473]
ENSCSAT00000010484.1	895	737.537	171.756	58	cdna;chromosome:ChlSab1.1:23:44737422:44775657:1;gene:ENSCSAG00000012390.1;gene_biotype:protein_coding;transcript_biotype:protein_coding;gene_symbol:NDFIP1;description:Nedd4;family;interacting;protein;1;[Source:NCBI;gene;(formerly;Entrezgene);Acc:103244711]
ENSCSAT00000015929.1	1010	852.514	171.649	67	cdna;chromosome:ChlSab1.1:28:12986346:12989174:-1;gene:ENSCSAG00000017840.1;gene_biotype:protein_coding;transcript_biotype:protein_coding;gene_symbol:COPS6;description:COP9;signalosome;subunit;6;[Source:HGNC;Symbol;Acc:HGNC:21749]
ENSCSAT00000015694.1	2974	2816.51	171.613	221.308	cdna;chromosome:ChlSab1.1:18:62521295:62529131:1;gene:ENSCSAG00000017599.1;gene_biotype:protein_coding;transcript_biotype:protein_coding;gene_symbol:MYL12B;description:myosin;light;chain;12B;[Source:NCBI;gene;(formerly;Entrezgene);Acc:103222701]
ENSCSAT00000018510.1	1599	1441.51	171.209	113	cdna;chromosome:ChlSab1.1:9:42216568:42218166:-1;gene:ENSCSAG00000018420.1;gene_biotype:protein_coding;transcript_biotype:protein_coding;gene_symbol:SLC18A3;description:solute;carrier;family;18;member;A3;[Source:NCBI;gene;(formerly;Entrezgene);Acc:103215828]
ENSCSAT00000012124.1	2331	2173.51	170.826	170	cdna;chromosome:ChlSab1.1:26:9772914:9785744:-1;gene:ENSCSAG00000014029.1;gene_biotype:protein_coding;transcript_biotype:protein_coding
ENSCSAT00000002677.1	4224	4066.51	170.794	318	cdna;chromosome:ChlSab1.1:6:29403500:29453162:1;gene:ENSCSAG00000004646.1;gene_biotype:protein_coding;transcript_biotype:protein_coding;gene_symbol:GPI;description:glucose-6-phosphate;isomerase;[Source:HGNC;Symbol;Acc:HGNC:4458]
ENSCSAT00000018690.1	645	487.585	170.216	38	cdna;chromosome:ChlSab1.1:8:92495636:92496280:1;gene:ENSCSAG00000018600.1;gene_biotype:protein_coding;transcript_biotype:protein_coding;description:high;mobility;group;protein;B1;[Source:NCBI;gene;(formerly;Entrezgene);Acc:103237177]
ENSCSAT00000017233.1	1174	1016.51	169.739	79	cdna;chromosome:ChlSab1.1:20:78884768:78907476:1;gene:ENSCSAG00000001300.1;gene_biotype:protein_coding;transcript_biotype:protein_coding;gene_symbol:TMEM59;description:transmembrane;protein;59;[Source:NCBI;gene;(formerly;Entrezgene);Acc:103224778]
ENSCSAT00000006817.1	1818	1660.51	169.673	129	cdna;chromosome:ChlSab1.1:8:138316980:138319456:1;gene:ENSCSAG00000008755.1;gene_biotype:protein_coding;transcript_biotype:protein_coding;gene_symbol:MAF1;description:MAF1;homolog,;negative;regulator;of;RNA;polymerase;III;[Source:NCBI;gene;(formerly;Entrezgene);Acc:103237607]
ENSCSAT00000007067.1	3634	3476.51	169.624	270	cdna;chromosome:ChlSab1.1:9:57255166:57376028:-1;gene:ENSCSAG00000009004.1;gene_biotype:protein_coding;transcript_biotype:protein_coding;gene_symbol:VCL;description:vinculin;[Source:NCBI;gene;(formerly;Entrezgene);Acc:103215981]
ENSCSAT00000008421.1	2592	2434.51	169.557	189	cdna;chromosome:ChlSab1.1:11:6783437:6789622:-1;gene:ENSCSAG00000010338.1;gene_biotype:protein_coding;transcript_biotype:protein_coding;gene_symbol:MLF2;description:myeloid;leukemia;factor;2;[Source:NCBI;gene;(formerly;Entrezgene);Acc:103218473]
ENSCSAT00000005933.1	639	481.587	169.415	37.356	cdna;chromosome:ChlSab1.1:11:23273522:23274162:1;gene:ENSCSAG00000007882.1;gene_biotype:pseudogene;transcript_biotype:pseudogene
ENSCSAT00000012086.1	2637	2479.51	169.123	192	cdna;chromosome:ChlSab1.1:9:3130566:3191576:1;gene:ENSCSAG00000013991.1;gene_biotype:protein_coding;transcript_biotype:protein_coding;gene_symbol:PFKP;description:phosphofructokinase,;platelet;[Source:NCBI;gene;(formerly;Entrezgene);Acc:103237780]
ENSCSAT00000013735.1	739	581.567	168.997	45	cdna;chromosome:ChlSab1.1:21:14095538:14098321:1;gene:ENSCSAG00000015650.1;gene_biotype:protein_coding;transcript_biotype:protein_coding;gene_symbol:TMED4;description:transmembrane;p24;trafficking;protein;4;[Source:NCBI;gene;(formerly;Entrezgene);Acc:103226132]
ENSCSAT00000009607.1	1866	1708.51	168.742	132	cdna;chromosome:ChlSab1.1:6:2209989:2234215:-1;gene:ENSCSAG00000011555.1;gene_biotype:protein_coding;transcript_biotype:protein_coding;gene_symbol:LMNB2;description:lamin;B2;[Source:NCBI;gene;(formerly;Entrezgene);Acc:103233631]
ENSCSAT00000007144.1	689	531.574	168.456	41	cdna;chromosome:ChlSab1.1:11:10087604:10096612:1;gene:ENSCSAG00000009078.1;gene_biotype:protein_coding;transcript_biotype:protein_coding;gene_symbol:GABARAPL1;description:GABA;type;A;receptor;associated;protein;like;1;[Source:NCBI;gene;(formerly;Entrezgene);Acc:103218578]
ENSCSAT00000017636.1	2012	1854.51	168.412	143	cdna;chromosome:ChlSab1.1:20:111891793:111901429:1;gene:ENSCSAG00000000897.1;gene_biotype:protein_coding;transcript_biotype:protein_coding;gene_symbol:DDOST;description:dolichyl-diphosphooligosaccharide--protein;glycosyltransferase;non-catalytic;subunit;[Source:NCBI;gene;(formerly;Entrezgene);Acc:103225449]
ENSCSAT00000011268.1	6074	5916.51	168.284	455.87	cdna;chromosome:ChlSab1.1:16:3978845:4022678:1;gene:ENSCSAG00000013175.1;gene_biotype:protein_coding;transcript_biotype:protein_coding;gene_symbol:SPNS2;description:sphingolipid;transporter;2;[Source:NCBI;gene;(formerly;Entrezgene);Acc:103242186]
ENSCSAT00000019809.1	183	51.936	168.212	4	cdna;chromosome:ChlSab1.1:23:53397036:53397218:1;gene:ENSCSAG00000019719.1;gene_biotype:protein_coding;transcript_biotype:protein_coding;gene_symbol:SMIM3;description:small;integral;membrane;protein;3;[Source:NCBI;gene;(formerly;Entrezgene);Acc:103244803]
ENSCSAT00000016127.1	1470	1312.51	168.068	101	cdna;scaffold:ChlSab1.1:KE148049.1:1467950:1476770:-1;gene:ENSCSAG00000018030.1;gene_biotype:protein_coding;transcript_biotype:protein_coding;gene_symbol:CERS2;description:ceramide;synthase;2;[Source:NCBI;gene;(formerly;Entrezgene);Acc:103247210]
ENSCSAT00000003312.1	1094	936.514	167.913	72	cdna;chromosome:ChlSab1.1:11:51905115:51909907:1;gene:ENSCSAG00000005281.1;gene_biotype:protein_coding;transcript_biotype:protein_coding;gene_symbol:CDK2;description:cyclin;dependent;kinase;2;[Source:NCBI;gene;(formerly;Entrezgene);Acc:103238495]
ENSCSAT00000005506.1	1068	910.514	167.911	70	cdna;chromosome:ChlSab1.1:17:61386880:61424798:-1;gene:ENSCSAG00000007460.1;gene_biotype:protein_coding;transcript_biotype:protein_coding
ENSCSAT00000010909.1	771	613.557	167.305	47	cdna;chromosome:ChlSab1.1:5:308442:310934:-1;gene:ENSCSAG00000012838.1;gene_biotype:protein_coding;transcript_biotype:protein_coding;gene_symbol:MRPL28;description:mitochondrial;ribosomal;protein;L28;[Source:NCBI;gene;(formerly;Entrezgene);Acc:103225375]
ENSCSAT00000004547.1	654	496.585	167.131	38	cdna;chromosome:ChlSab1.1:19:21344865:21347264:1;gene:ENSCSAG00000006519.1;gene_biotype:protein_coding;transcript_biotype:protein_coding;gene_symbol:TOMM22;description:translocase;of;outer;mitochondrial;membrane;22;[Source:NCBI;gene;(formerly;Entrezgene);Acc:103223321]
ENSCSAT00000003268.1	1336	1178.51	166.792	90	cdna;chromosome:ChlSab1.1:11:52045040:52053671:1;gene:ENSCSAG00000005246.1;gene_biotype:protein_coding;transcript_biotype:protein_coding
ENSCSAT00000017460.1	2580	2422.51	166.791	185	cdna;chromosome:ChlSab1.1:20:99507489:99557540:1;gene:ENSCSAG00000001073.1;gene_biotype:protein_coding;transcript_biotype:protein_coding;gene_symbol:PHC2;description:polyhomeotic;homolog;2;[Source:NCBI;gene;(formerly;Entrezgene);Acc:103225160]
ENSCSAT00000002532.1	1627	1469.51	166.46	112	cdna;chromosome:ChlSab1.1:9:117639317:117804850:-1;gene:ENSCSAG00000004503.1;gene_biotype:protein_coding;transcript_biotype:protein_coding
ENSCSAT00000007116.1	4038	3880.51	166.035	295	cdna;chromosome:ChlSab1.1:2:66037261:66321306:1;gene:ENSCSAG00000009049.1;gene_biotype:protein_coding;transcript_biotype:protein_coding;gene_symbol:APP;description:amyloid;beta;precursor;protein;[Source:NCBI;gene;(formerly;Entrezgene);Acc:103217727]
ENSCSAT00000011414.1	618	460.594	165.965	35	cdna;chromosome:ChlSab1.1:2:33726001:33727824:1;gene:ENSCSAG00000013328.1;gene_biotype:protein_coding;transcript_biotype:protein_coding;gene_symbol:MRPS26;description:mitochondrial;ribosomal;protein;S26;[Source:NCBI;gene;(formerly;Entrezgene);Acc:103247164]
ENSCSAT00000011902.1	684	526.574	165.908	40	cdna;chromosome:ChlSab1.1:16:1680708:1681756:1;gene:ENSCSAG00000013814.1;gene_biotype:protein_coding;transcript_biotype:protein_coding;gene_symbol:OVCA2;description:OVCA2;serine;hydrolase;domain;containing;[Source:NCBI;gene;(formerly;Entrezgene);Acc:103242123]
ENSCSAT00000010119.1	606	448.594	165.536	34	cdna;chromosome:ChlSab1.1:19:5612268:5622191:-1;gene:ENSCSAG00000012086.1;gene_biotype:protein_coding;transcript_biotype:protein_coding;gene_symbol:RANBP1;description:RAN;binding;protein;1;[Source:NCBI;gene;(formerly;Entrezgene);Acc:103222986]
ENSCSAT00000016780.1	1425	1267.51	165.419	96	cdna;chromosome:ChlSab1.1:6:47828600:47974101:-1;gene:ENSCSAG00000001750.1;gene_biotype:protein_coding;transcript_biotype:protein_coding
ENSCSAT00000018917.1	567	409.613	165.293	31	cdna;chromosome:ChlSab1.1:6:7168854:7169420:1;gene:ENSCSAG00000018827.1;gene_biotype:protein_coding;transcript_biotype:protein_coding;gene_symbol:TRAPPC5;description:trafficking;protein;particle;complex;5;[Source:NCBI;gene;(formerly;Entrezgene);Acc:103233810]
ENSCSAT00000013603.1	885	727.541	165.109	55	cdna;chromosome:ChlSab1.1:4:67863034:67869895:1;gene:ENSCSAG00000015522.1;gene_biotype:protein_coding;transcript_biotype:protein_coding;gene_symbol:BTF3;description:basic;transcription;factor;3;[Source:NCBI;gene;(formerly;Entrezgene);Acc:103223046]
ENSCSAT00000013688.1	1110	952.514	165.093	72	cdna;chromosome:ChlSab1.1:2:5135770:5145630:1;gene:ENSCSAG00000015592.1;gene_biotype:protein_coding;transcript_biotype:protein_coding;gene_symbol:CTSZ;description:cathepsin;Z;[Source:HGNC;Symbol;Acc:HGNC:2547]
ENSCSAT00000010947.1	2341	2183.51	164.042	164	cdna;chromosome:ChlSab1.1:2:35512861:35530966:1;gene:ENSCSAG00000012853.1;gene_biotype:protein_coding;transcript_biotype:protein_coding;gene_symbol:TRIB3;description:tribbles;pseudokinase;3;[Source:NCBI;gene;(formerly;Entrezgene);Acc:103247816]
ENSCSAT00000009503.1	2520	2362.51	163.631	177	cdna;chromosome:ChlSab1.1:9:32202204:32258154:-1;gene:ENSCSAG00000011418.1;gene_biotype:protein_coding;transcript_biotype:protein_coding;gene_symbol:ITGB1;description:integrin;subunit;beta;1;[Source:NCBI;gene;(formerly;Entrezgene);Acc:103238098]
ENSCSAT00000005041.1	1146	988.514	163.499	74	cdna;chromosome:ChlSab1.1:5:20128176:20175564:1;gene:ENSCSAG00000007017.1;gene_biotype:protein_coding;transcript_biotype:protein_coding;gene_symbol:METTL9;description:methyltransferase;like;9;[Source:NCBI;gene;(formerly;Entrezgene);Acc:103229656]
ENSCSAT00000017763.1	7146	6988.51	163.45	523	cdna;chromosome:ChlSab1.1:20:121944391:122042474:1;gene:ENSCSAG00000000771.1;gene_biotype:protein_coding;transcript_biotype:protein_coding;gene_symbol:CLSTN1;description:calsyntenin;1;[Source:NCBI;gene;(formerly;Entrezgene);Acc:103225638]
ENSCSAT00000018668.1	602	444.598	163.333	33.249	cdna;chromosome:ChlSab1.1:18:70826193:70826794:1;gene:ENSCSAG00000018578.1;gene_biotype:protein_coding;transcript_biotype:protein_coding;description:60S;ribosomal;protein;L12;[Source:NCBI;gene;(formerly;Entrezgene);Acc:103222806]
ENSCSAT00000008381.1	2618	2460.51	163.327	184	cdna;chromosome:ChlSab1.1:17:35445223:35454342:-1;gene:ENSCSAG00000010296.1;gene_biotype:protein_coding;transcript_biotype:protein_coding;gene_symbol:CDKN1A;description:cyclin;dependent;kinase;inhibitor;1A;[Source:NCBI;gene;(formerly;Entrezgene);Acc:103221583]
ENSCSAT00000013024.1	653	495.585	163.061	37	cdna;chromosome:ChlSab1.1:23:16167557:16210050:-1;gene:ENSCSAG00000014928.1;gene_biotype:protein_coding;transcript_biotype:protein_coding;gene_symbol:REEP5;description:receptor;accessory;protein;5;[Source:NCBI;gene;(formerly;Entrezgene);Acc:103244342]
ENSCSAT00000010420.1	519	361.646	163.06	27	cdna;chromosome:ChlSab1.1:6:874119:874983:1;gene:ENSCSAG00000012327.1;gene_biotype:protein_coding;transcript_biotype:protein_coding
ENSCSAT00000017995.1	186	53.679	162.752	4	cdna;chromosome:ChlSab1.1:16:46033015:46033200:-1;gene:ENSCSAG00000000540.1;gene_biotype:protein_coding;transcript_biotype:protein_coding;gene_symbol:SMIM6;description:small;integral;membrane;protein;6;[Source:HGNC;Symbol;Acc:HGNC:40032]
ENSCSAT00000016674.1	762	604.557	162.571	45	cdna;chromosome:ChlSab1.1:20:10240451:10243294:1;gene:ENSCSAG00000001855.1;gene_biotype:protein_coding;transcript_biotype:protein_coding;gene_symbol:S100A2;description:S100;calcium;binding;protein;A2;[Source:NCBI;gene;(formerly;Entrezgene);Acc:103223960]
ENSCSAT00000005256.1	1716	1558.51	162.536	115.983	cdna;chromosome:ChlSab1.1:14:97196141:97226521:-1;gene:ENSCSAG00000007213.1;gene_biotype:protein_coding;transcript_biotype:protein_coding;gene_symbol:HPCAL1;description:hippocalcin;like;1;[Source:NCBI;gene;(formerly;Entrezgene);Acc:103220825]
ENSCSAT00000010063.1	2592	2434.51	162.38	181	cdna;chromosome:ChlSab1.1:6:1357204:1371777:-1;gene:ENSCSAG00000011976.1;gene_biotype:protein_coding;transcript_biotype:protein_coding;gene_symbol:MBD3;description:methyl-CpG;binding;domain;protein;3;[Source:NCBI;gene;(formerly;Entrezgene);Acc:103233615]
ENSCSAT00000001902.1	2290	2132.51	161.82	158	cdna;chromosome:ChlSab1.1:6:33963231:33988246:1;gene:ENSCSAG00000003873.1;gene_biotype:protein_coding;transcript_biotype:protein_coding;gene_symbol:SAMD4B;description:sterile;alpha;motif;domain;containing;4B;[Source:NCBI;gene;(formerly;Entrezgene);Acc:103234671]
ENSCSAT00000014480.1	1143	985.514	161.781	73	cdna;chromosome:ChlSab1.1:2:686129:687892:-1;gene:ENSCSAG00000016387.1;gene_biotype:protein_coding;transcript_biotype:protein_coding;gene_symbol:PPDPF;description:pancreatic;progenitor;cell;differentiation;and;proliferation;factor;[Source:NCBI;gene;(formerly;Entrezgene);Acc:103242662]
ENSCSAT00000006454.1	1280	1122.51	161.493	83	cdna;chromosome:ChlSab1.1:9:60417469:60422764:1;gene:ENSCSAG00000008401.1;gene_biotype:protein_coding;transcript_biotype:protein_coding;gene_symbol:PCBD1;description:pterin-4;alpha-carbinolamine;dehydratase;1;[Source:HGNC;Symbol;Acc:HGNC:8646]
ENSCSAT00000016235.1	631	473.59	161.411	35	cdna;chromosome:ChlSab1.1:3:31742:32566:-1;gene:ENSCSAG00000018138.1;gene_biotype:protein_coding;transcript_biotype:protein_coding;gene_symbol:MRPL57;description:mitochondrial;ribosomal;protein;L57;[Source:NCBI;gene;(formerly;Entrezgene);Acc:103248950]
ENSCSAT00000003903.1	5357	5199.51	161.3	384	cdna;chromosome:ChlSab1.1:16:33752556:33799102:-1;gene:ENSCSAG00000005869.1;gene_biotype:protein_coding;transcript_biotype:protein_coding;gene_symbol:CLTC;description:clathrin;heavy;chain;[Source:HGNC;Symbol;Acc:HGNC:2092]
ENSCSAT00000016945.1	808	650.545	161.15	48	cdna;chromosome:ChlSab1.1:6:50827284:50830702:-1;gene:ENSCSAG00000001588.1;gene_biotype:protein_coding;transcript_biotype:protein_coding;gene_symbol:CHMP2A;description:charged;multivesicular;body;protein;2A;[Source:NCBI;gene;(formerly;Entrezgene);Acc:103235462]
ENSCSAT00000004932.1	845	687.542	160.861	50.639	cdna;chromosome:ChlSab1.1:1:10248141:10259688:-1;gene:ENSCSAG00000006902.1;gene_biotype:protein_coding;transcript_biotype:protein_coding;gene_symbol:OTUB1;description:OTU;deubiquitinase,;ubiquitin;aldehyde;binding;1;[Source:HGNC;Symbol;Acc:HGNC:23077]
ENSCSAT00000006889.1	1082	924.514	160.643	68	cdna;chromosome:ChlSab1.1:1:6499249:6505699:-1;gene:ENSCSAG00000008821.1;gene_biotype:protein_coding;transcript_biotype:protein_coding;gene_symbol:NDUFS8;description:NADH:ubiquinone;oxidoreductase;core;subunit;S8;[Source:NCBI;gene;(formerly;Entrezgene);Acc:103215835]
ENSCSAT00000010038.1	4606	4448.51	160.546	327	cdna;chromosome:ChlSab1.1:X:55660234:55735191:1;gene:ENSCSAG00000011947.1;gene_biotype:protein_coding;transcript_biotype:protein_coding;gene_symbol:MSN;description:moesin;[Source:NCBI;gene;(formerly;Entrezgene);Acc:103232093]
ENSCSAT00000007495.1	1206	1048.51	160.392	77	cdna;chromosome:ChlSab1.1:15:77608760:77635960:1;gene:ENSCSAG00000009478.1;gene_biotype:protein_coding;transcript_biotype:protein_coding;gene_symbol:CRTAP;description:cartilage;associated;protein;[Source:HGNC;Symbol;Acc:HGNC:2379]
ENSCSAT00000019210.1	1206	1048.51	160.392	77	cdna;chromosome:ChlSab1.1:21:54376882:54378087:-1;gene:ENSCSAG00000019120.1;gene_biotype:protein_coding;transcript_biotype:protein_coding
ENSCSAT00000003373.1	3009	2851.51	160.08	209	cdna;chromosome:ChlSab1.1:6:17007390:17017714:-1;gene:ENSCSAG00000005342.1;gene_biotype:protein_coding;transcript_biotype:protein_coding;gene_symbol:FKBP8;description:FKBP;prolyl;isomerase;8;[Source:HGNC;Symbol;Acc:HGNC:3724]
ENSCSAT00000011799.1	6134	5976.51	160.064	438	cdna;chromosome:ChlSab1.1:15:5084780:5105288:-1;gene:ENSCSAG00000013704.1;gene_biotype:protein_coding;transcript_biotype:protein_coding;gene_symbol:EIF4G1;description:eukaryotic;translation;initiation;factor;4;gamma;1;[Source:HGNC;Symbol;Acc:HGNC:3296]
ENSCSAT00000016065.1	4734	4576.51	159.73	334.699	cdna;chromosome:ChlSab1.1:18:34816027:34830924:1;gene:ENSCSAG00000017968.1;gene_biotype:protein_coding;transcript_biotype:protein_coding;gene_symbol:ATP5F1A;description:ATP;synthase;F1;subunit;alpha;[Source:HGNC;Symbol;Acc:HGNC:823]
ENSCSAT00000016541.1	7917	7759.51	159.594	567	cdna;chromosome:ChlSab1.1:11:119676345:119917000:-1;gene:ENSCSAG00000002015.1;gene_biotype:protein_coding;transcript_biotype:protein_coding;gene_symbol:NCOR2;description:nuclear;receptor;corepressor;2;[Source:NCBI;gene;(formerly;Entrezgene);Acc:103239348]
ENSCSAT00000003855.1	1801	1643.51	159.468	120	cdna;chromosome:ChlSab1.1:11:48243216:48251371:1;gene:ENSCSAG00000005819.1;gene_biotype:protein_coding;transcript_biotype:protein_coding;gene_symbol:ATG101;description:autophagy;related;101;[Source:NCBI;gene;(formerly;Entrezgene);Acc:103238337]
ENSCSAT00000005748.1	6225	6067.51	159.379	442.768	cdna;chromosome:ChlSab1.1:16:19107508:19151603:-1;gene:ENSCSAG00000007698.1;gene_biotype:protein_coding;transcript_biotype:protein_coding;gene_symbol:USP22;description:ubiquitin;specific;peptidase;22;[Source:NCBI;gene;(formerly;Entrezgene);Acc:103242530]
ENSCSAT00000002280.1	735	577.567	158.823	42	cdna;chromosome:ChlSab1.1:6:31021913:31033188:1;gene:ENSCSAG00000004251.1;gene_biotype:protein_coding;transcript_biotype:protein_coding;gene_symbol:TBCB;description:tubulin;folding;cofactor;B;[Source:NCBI;gene;(formerly;Entrezgene);Acc:103234556]
ENSCSAT00000001728.1	1299	1141.51	158.805	83	cdna;chromosome:ChlSab1.1:7:69093543:69099497:-1;gene:ENSCSAG00000003701.1;gene_biotype:protein_coding;transcript_biotype:protein_coding;gene_symbol:CCNA2;description:cyclin;A2;[Source:NCBI;gene;(formerly;Entrezgene);Acc:103236201]
ENSCSAT00000005824.1	2400	2242.51	158.752	163	cdna;chromosome:ChlSab1.1:22:55944865:56069930:1;gene:ENSCSAG00000007851.1;gene_biotype:protein_coding;transcript_biotype:protein_coding;gene_symbol:ITGB5;description:integrin;subunit;beta;5;[Source:NCBI;gene;(formerly;Entrezgene);Acc:103228149]
ENSCSAT00000018658.1	372	214.928	158.634	15.611	cdna;chromosome:ChlSab1.1:18:30347334:30347705:1;gene:ENSCSAG00000018568.1;gene_biotype:protein_coding;transcript_biotype:protein_coding
ENSCSAT00000003646.1	1039	881.514	158.569	64	cdna;chromosome:ChlSab1.1:19:25686981:25690768:1;gene:ENSCSAG00000005612.1;gene_biotype:protein_coding;transcript_biotype:protein_coding;gene_symbol:TSPO;description:translocator;protein;[Source:HGNC;Symbol;Acc:HGNC:1158]
ENSCSAT00000006200.1	3864	3706.51	158.509	269	cdna;chromosome:ChlSab1.1:16:17285724:17300041:-1;gene:ENSCSAG00000008153.1;gene_biotype:protein_coding;transcript_biotype:protein_coding;gene_symbol:FLII;description:FLII;actin;remodeling;protein;[Source:NCBI;gene;(formerly;Entrezgene);Acc:103242486]
ENSCSAT00000011022.1	2384	2226.51	157.931	161	cdna;chromosome:ChlSab1.1:16:4431436:4439786:1;gene:ENSCSAG00000012928.1;gene_biotype:protein_coding;transcript_biotype:protein_coding;gene_symbol:ENO3;description:enolase;3;[Source:NCBI;gene;(formerly;Entrezgene);Acc:103242214]
ENSCSAT00000000995.1	189	55.338	157.871	4	cdna;chromosome:ChlSab1.1:11:100538647:100575739:1;gene:ENSCSAG00000002966.1;gene_biotype:protein_coding;transcript_biotype:protein_coding;gene_symbol:C12orf75;description:chromosome;12;open;reading;frame;75;[Source:HGNC;Symbol;Acc:HGNC:35164]
ENSCSAT00000009400.1	1016	858.514	157.729	62	cdna;chromosome:ChlSab1.1:17:30221598:30227452:1;gene:ENSCSAG00000011312.1;gene_biotype:protein_coding;transcript_biotype:protein_coding;gene_symbol:CCND3;description:cyclin;D3;[Source:NCBI;gene;(formerly;Entrezgene);Acc:103221504]
ENSCSAT00000006664.1	1658	1500.51	157.199	108	cdna;chromosome:ChlSab1.1:1:6820807:6825451:1;gene:ENSCSAG00000008604.1;gene_biotype:protein_coding;transcript_biotype:protein_coding;gene_symbol:CORO1B;description:coronin;1B;[Source:NCBI;gene;(formerly;Entrezgene);Acc:103217721]
ENSCSAT00000019508.1	264	111.152	157.195	8	cdna;chromosome:ChlSab1.1:4:72636721:72636984:-1;gene:ENSCSAG00000019418.1;gene_biotype:protein_coding;transcript_biotype:protein_coding
ENSCSAT00000005228.1	1371	1213.51	156.523	86.967	cdna;chromosome:ChlSab1.1:14:97512832:97521932:-1;gene:ENSCSAG00000007201.1;gene_biotype:protein_coding;transcript_biotype:protein_coding;gene_symbol:RRM2;description:ribonucleotide;reductase;regulatory;subunit;M2;[Source:HGNC;Symbol;Acc:HGNC:10452]
ENSCSAT00000004496.1	409	251.761	156.153	18	cdna;chromosome:ChlSab1.1:1:12062215:12065659:1;gene:ENSCSAG00000006457.1;gene_biotype:protein_coding;transcript_biotype:protein_coding;gene_symbol:TMEM258;description:transmembrane;protein;258;[Source:NCBI;gene;(formerly;Entrezgene);Acc:103234205]
ENSCSAT00000017316.1	1392	1234.51	155.687	88	cdna;chromosome:ChlSab1.1:20:87228189:87245466:-1;gene:ENSCSAG00000001217.1;gene_biotype:protein_coding;transcript_biotype:protein_coding;gene_symbol:AKR1A1;description:aldo-keto;reductase;family;1;member;A1;[Source:NCBI;gene;(formerly;Entrezgene);Acc:103224909]
ENSCSAT00000005412.1	4219	4061.51	155.409	289	cdna;chromosome:ChlSab1.1:19:20264082:20276266:1;gene:ENSCSAG00000007367.1;gene_biotype:protein_coding;transcript_biotype:protein_coding;gene_symbol:CDC42EP1;description:CDC42;effector;protein;1;[Source:NCBI;gene;(formerly;Entrezgene);Acc:103223280]
ENSCSAT00000009702.1	4195	4037.51	155.251	287	cdna;chromosome:ChlSab1.1:17:29001805:29083700:-1;gene:ENSCSAG00000011617.1;gene_biotype:protein_coding;transcript_biotype:protein_coding;gene_symbol:PTK7;description:protein;tyrosine;kinase;7;(inactive);[Source:NCBI;gene;(formerly;Entrezgene);Acc:103221474]
ENSCSAT00000008462.1	3605	3447.51	155.213	245	cdna;chromosome:ChlSab1.1:17:35156285:35175980:1;gene:ENSCSAG00000010374.1;gene_biotype:protein_coding;transcript_biotype:protein_coding;gene_symbol:MTCH1;description:mitochondrial;carrier;1;[Source:NCBI;gene;(formerly;Entrezgene);Acc:103221576]
ENSCSAT00000018999.1	609	451.594	154.763	32	cdna;chromosome:ChlSab1.1:11:71418276:71418884:-1;gene:ENSCSAG00000018909.1;gene_biotype:protein_coding;transcript_biotype:protein_coding;description:securin-like;[Source:NCBI;gene;(formerly;Entrezgene);Acc:103238749]
ENSCSAT00000006919.1	1668	1510.51	154.713	107	cdna;chromosome:ChlSab1.1:23:79336997:79358421:-1;gene:ENSCSAG00000008853.1;gene_biotype:protein_coding;transcript_biotype:protein_coding;gene_symbol:LMAN2;description:lectin,;mannose;binding;2;[Source:NCBI;gene;(formerly;Entrezgene);Acc:103245049]
ENSCSAT00000005942.1	1811	1653.51	154.541	117	cdna;chromosome:ChlSab1.1:19:19221199:19238468:-1;gene:ENSCSAG00000007898.1;gene_biotype:protein_coding;transcript_biotype:protein_coding;gene_symbol:EIF3D;description:eukaryotic;translation;initiation;factor;3;subunit;D;[Source:NCBI;gene;(formerly;Entrezgene);Acc:103223253]
ENSCSAT00000011001.1	3762	3604.51	154.511	255	cdna;chromosome:ChlSab1.1:26:18158859:18197109:1;gene:ENSCSAG00000012938.1;gene_biotype:protein_coding;transcript_biotype:protein_coding;gene_symbol:IGDCC4;description:immunoglobulin;superfamily;DCC;subclass;member;4;[Source:NCBI;gene;(formerly;Entrezgene);Acc:103245469]
ENSCSAT00000008533.1	1262	1104.51	154.238	78	cdna;chromosome:ChlSab1.1:16:7732921:7740325:-1;gene:ENSCSAG00000010445.1;gene_biotype:protein_coding;transcript_biotype:protein_coding;description:ribosomal;protein;L26;[Source:NCBI;gene;(formerly;Entrezgene);Acc:103242359]
ENSCSAT00000008771.1	2457	2299.51	153.867	162	cdna;chromosome:ChlSab1.1:11:6364330:6378902:-1;gene:ENSCSAG00000010687.1;gene_biotype:protein_coding;transcript_biotype:protein_coding;gene_symbol:TNFRSF1A;description:TNF;receptor;superfamily;member;1A;[Source:NCBI;gene;(formerly;Entrezgene);Acc:103218446]
ENSCSAT00000010253.1	2061	1903.51	153.75	134	cdna;chromosome:ChlSab1.1:23:49945023:50060392:-1;gene:ENSCSAG00000012209.1;gene_biotype:protein_coding;transcript_biotype:protein_coding;gene_symbol:DPYSL3;description:dihydropyrimidinase;like;3;[Source:HGNC;Symbol;Acc:HGNC:3015]
ENSCSAT00000015716.1	1041	883.514	153.266	62	cdna;chromosome:ChlSab1.1:18:60030658:60041856:1;gene:ENSCSAG00000017621.1;gene_biotype:protein_coding;transcript_biotype:protein_coding;gene_symbol:TYMS;description:thymidylate;synthetase;[Source:NCBI;gene;(formerly;Entrezgene);Acc:103222680]
ENSCSAT00000009903.1	1600	1442.51	152.921	101	cdna;chromosome:ChlSab1.1:23:52114053:52168998:-1;gene:ENSCSAG00000011814.1;gene_biotype:protein_coding;transcript_biotype:protein_coding;gene_symbol:CSNK1A1;description:casein;kinase;1;alpha;1;[Source:NCBI;gene;(formerly;Entrezgene);Acc:103244781]
ENSCSAT00000004504.1	4920	4762.51	152.713	333	cdna;chromosome:ChlSab1.1:1:12037513:12055159:1;gene:ENSCSAG00000006469.1;gene_biotype:protein_coding;transcript_biotype:protein_coding;gene_symbol:FADS1;description:fatty;acid;desaturase;1;[Source:HGNC;Symbol;Acc:HGNC:3574]
ENSCSAT00000015942.1	2976	2818.51	152.656	197	cdna;chromosome:ChlSab1.1:28:12977013:12985898:1;gene:ENSCSAG00000017846.1;gene_biotype:protein_coding;transcript_biotype:protein_coding;gene_symbol:MCM7;description:minichromosome;maintenance;complex;component;7;[Source:NCBI;gene;(formerly;Entrezgene);Acc:103246753]
ENSCSAT00000007640.1	873	715.541	152.617	50	cdna;chromosome:ChlSab1.1:23:75056015:75119704:1;gene:ENSCSAG00000009579.1;gene_biotype:protein_coding;transcript_biotype:protein_coding;gene_symbol:ERGIC1;description:endoplasmic;reticulum-golgi;intermediate;compartment;1;[Source:HGNC;Symbol;Acc:HGNC:29205]
ENSCSAT00000002691.1	758	600.557	152.565	41.951	cdna;chromosome:ChlSab1.1:16:46625651:46630541:1;gene:ENSCSAG00000004661.1;gene_biotype:protein_coding;transcript_biotype:protein_coding;description:ATP;synthase;peripheral;stalk;subunit;d;[Source:NCBI;gene;(formerly;Entrezgene);Acc:103243059]
ENSCSAT00000006232.1	2821	2663.51	152.519	186	cdna;chromosome:ChlSab1.1:16:17222378:17249117:1;gene:ENSCSAG00000008183.1;gene_biotype:protein_coding;transcript_biotype:protein_coding;gene_symbol:ALKBH5;description:alkB;homolog;5,;RNA;demethylase;[Source:NCBI;gene;(formerly;Entrezgene);Acc:103242480]
ENSCSAT00000017641.1	234	85.996	152.384	6	cdna;chromosome:ChlSab1.1:20:112065581:112067256:1;gene:ENSCSAG00000000892.1;gene_biotype:protein_coding;transcript_biotype:protein_coding;gene_symbol:CAMK2N1;description:calcium/calmodulin;dependent;protein;kinase;II;inhibitor;1;[Source:NCBI;gene;(formerly;Entrezgene);Acc:103225456]
ENSCSAT00000015692.1	1879	1721.51	152.243	120	cdna;chromosome:ChlSab1.1:18:62690118:62698565:1;gene:ENSCSAG00000017597.1;gene_biotype:protein_coding;transcript_biotype:protein_coding;gene_symbol:TGIF1;description:TGFB;induced;factor;homeobox;1;[Source:HGNC;Symbol;Acc:HGNC:11776]
ENSCSAT00000002892.1	4546	4388.51	151.876	305.169	cdna;chromosome:ChlSab1.1:5:43570189:43596087:1;gene:ENSCSAG00000004867.1;gene_biotype:protein_coding;transcript_biotype:protein_coding;gene_symbol:ADGRG1;description:adhesion;G;protein-coupled;receptor;G1;[Source:NCBI;gene;(formerly;Entrezgene);Acc:103233066]
ENSCSAT00000013335.1	3961	3803.51	151.595	264	cdna;chromosome:ChlSab1.1:12:4759388:4776219:1;gene:ENSCSAG00000015237.1;gene_biotype:protein_coding;transcript_biotype:protein_coding;gene_symbol:SURF4;description:surfeit;4;[Source:NCBI;gene;(formerly;Entrezgene);Acc:103239689]
ENSCSAT00000013556.1	1315	1157.51	151.577	80.333	cdna;chromosome:ChlSab1.1:14:33730815:33732459:1;gene:ENSCSAG00000015462.1;gene_biotype:protein_coding;transcript_biotype:protein_coding;description:acidic;fibroblast;growth;factor;intracellular-binding;protein;[Source:NCBI;gene;(formerly;Entrezgene);Acc:103220052]
ENSCSAT00000002955.1	6747	6589.51	151.471	457	cdna;chromosome:ChlSab1.1:19:32764272:32784566:-1;gene:ENSCSAG00000004926.1;gene_biotype:protein_coding;transcript_biotype:protein_coding;gene_symbol:PLXNB2;description:plexin;B2;[Source:NCBI;gene;(formerly;Entrezgene);Acc:103223557]
ENSCSAT00000014755.1	504	346.658	151.209	24	cdna;chromosome:ChlSab1.1:2:307988:310475:-1;gene:ENSCSAG00000016656.1;gene_biotype:protein_coding;transcript_biotype:protein_coding;gene_symbol:DNAJC5;description:DnaJ;heat;shock;protein;family;(Hsp40);member;C5;[Source:NCBI;gene;(formerly;Entrezgene);Acc:103242453]
ENSCSAT00000015613.1	3509	3351.51	151.187	232	cdna;chromosome:ChlSab1.1:3:76807211:77100720:1;gene:ENSCSAG00000017518.1;gene_biotype:protein_coding;transcript_biotype:protein_coding;gene_symbol:FARP1;description:FERM,;ARH/RhoGEF;and;pleckstrin;domain;protein;1;[Source:NCBI;gene;(formerly;Entrezgene);Acc:103214698]
ENSCSAT00000019536.1	1386	1228.51	151.119	85.002	cdna;chromosome:ChlSab1.1:14:43752266:43753651:-1;gene:ENSCSAG00000019446.1;gene_biotype:protein_coding;transcript_biotype:protein_coding
ENSCSAT00000016555.1	3109	2951.51	150.957	204	cdna;chromosome:ChlSab1.1:20:8858458:8866610:1;gene:ENSCSAG00000001975.1;gene_biotype:protein_coding;transcript_biotype:protein_coding;gene_symbol:SHC1;description:SHC;adaptor;protein;1;[Source:NCBI;gene;(formerly;Entrezgene);Acc:103223899]
ENSCSAT00000000209.1	2169	2011.51	150.924	139	cdna;chromosome:ChlSab1.1:20:7119450:7122834:1;gene:ENSCSAG00000002192.1;gene_biotype:protein_coding;transcript_biotype:protein_coding;gene_symbol:HDGF;description:heparin;binding;growth;factor;[Source:HGNC;Symbol;Acc:HGNC:4856]
ENSCSAT00000019004.1	345	188.219	150.85	13	cdna;chromosome:ChlSab1.1:11:74202758:74203102:1;gene:ENSCSAG00000018914.1;gene_biotype:protein_coding;transcript_biotype:protein_coding
ENSCSAT00000000176.1	929	771.518	150.799	53.269	cdna;chromosome:ChlSab1.1:20:7268100:7270442:-1;gene:ENSCSAG00000002158.1;gene_biotype:protein_coding;transcript_biotype:protein_coding;gene_symbol:NAXE;description:NAD(P)HX;epimerase;[Source:NCBI;gene;(formerly;Entrezgene);Acc:103223835]
ENSCSAT00000010472.1	2042	1884.51	150.664	130	cdna;chromosome:ChlSab1.1:8:92563550:92640231:1;gene:ENSCSAG00000012378.1;gene_biotype:protein_coding;transcript_biotype:protein_coding;gene_symbol:MTDH;description:metadherin;[Source:NCBI;gene;(formerly;Entrezgene);Acc:103237179]
ENSCSAT00000002939.1	897	739.537	150.618	51	cdna;chromosome:ChlSab1.1:16:45775337:45789950:1;gene:ENSCSAG00000004925.1;gene_biotype:protein_coding;transcript_biotype:protein_coding;gene_symbol:MRPL38;description:mitochondrial;ribosomal;protein;L38;[Source:HGNC;Symbol;Acc:HGNC:14033]
ENSCSAT00000001391.1	999	841.514	150.534	58	cdna;chromosome:ChlSab1.1:6:37173177:37191754:-1;gene:ENSCSAG00000003374.1;gene_biotype:protein_coding;transcript_biotype:protein_coding;gene_symbol:PLAUR;description:plasminogen;activator,;urokinase;receptor;[Source:HGNC;Symbol;Acc:HGNC:9053]
ENSCSAT00000006821.1	4065	3907.51	150.344	268.98	cdna;chromosome:ChlSab1.1:8:138307581:138312915:1;gene:ENSCSAG00000008758.1;gene_biotype:protein_coding;transcript_biotype:protein_coding;gene_symbol:CYC1;description:cytochrome;c1,;heme;protein,;mitochondrial;[Source:NCBI;gene;(formerly;Entrezgene);Acc:103237609]
ENSCSAT00000009017.1	3053	2895.51	150.105	199	cdna;chromosome:ChlSab1.1:21:85197537:85206588:1;gene:ENSCSAG00000010925.1;gene_biotype:protein_coding;transcript_biotype:protein_coding;gene_symbol:CAV2;description:caveolin;2;[Source:NCBI;gene;(formerly;Entrezgene);Acc:103226769]
ENSCSAT00000016673.1	2181	2023.51	150.029	139	cdna;chromosome:ChlSab1.1:20:10192465:10198890:1;gene:ENSCSAG00000001856.1;gene_biotype:protein_coding;transcript_biotype:protein_coding;gene_symbol:S100A16;description:S100;calcium;binding;protein;A16;[Source:HGNC;Symbol;Acc:HGNC:20441]
ENSCSAT00000015701.1	2821	2663.51	149.886	182.789	cdna;chromosome:ChlSab1.1:28:19082864:19091900:-1;gene:ENSCSAG00000017606.1;gene_biotype:protein_coding;transcript_biotype:protein_coding;gene_symbol:LFNG;description:LFNG;O-fucosylpeptide;3-beta-N-acetylglucosaminyltransferase;[Source:HGNC;Symbol;Acc:HGNC:6560]
ENSCSAT00000012048.1	1105	947.514	149.829	65	cdna;chromosome:ChlSab1.1:9:3875356:3881229:-1;gene:ENSCSAG00000013954.1;gene_biotype:protein_coding;transcript_biotype:protein_coding;gene_symbol:KLF6;description:Kruppel;like;factor;6;[Source:NCBI;gene;(formerly;Entrezgene);Acc:103237791]
ENSCSAT00000016607.1	762	604.557	149.631	41.418	cdna;chromosome:ChlSab1.1:20:9601595:9616495:1;gene:ENSCSAG00000001924.1;gene_biotype:protein_coding;transcript_biotype:protein_coding;description:chromosome;20;C1orf43;homolog;[Source:NCBI;gene;(formerly;Entrezgene);Acc:103223932]
ENSCSAT00000019647.1	552	394.626	149.432	27	cdna;chromosome:ChlSab1.1:X:35945581:35946132:1;gene:ENSCSAG00000019557.1;gene_biotype:protein_coding;transcript_biotype:protein_coding;gene_symbol:MID1IP1;description:MID1;interacting;protein;1;[Source:NCBI;gene;(formerly;Entrezgene);Acc:103231799]
ENSCSAT00000000251.1	669	511.574	149.426	35	cdna;chromosome:ChlSab1.1:16:73633918:73638902:1;gene:ENSCSAG00000002234.1;gene_biotype:protein_coding;transcript_biotype:protein_coding;gene_symbol:MRPL12;description:mitochondrial;ribosomal;protein;L12;[Source:NCBI;gene;(formerly;Entrezgene);Acc:103243728]
ENSCSAT00000018170.1	435	277.72	149.421	19	cdna;chromosome:ChlSab1.1:29:17038698:17039132:1;gene:ENSCSAG00000000365.1;gene_biotype:protein_coding;transcript_biotype:protein_coding
ENSCSAT00000017330.1	2502	2344.51	149.051	160	cdna;chromosome:ChlSab1.1:20:88010616:88015477:-1;gene:ENSCSAG00000001203.1;gene_biotype:protein_coding;transcript_biotype:protein_coding;gene_symbol:RPS8;description:ribosomal;protein;S8;[Source:NCBI;gene;(formerly;Entrezgene);Acc:103224933]
ENSCSAT00000006901.1	1169	1011.51	148.986	69	cdna;chromosome:ChlSab1.1:8:138200792:138202453:1;gene:ENSCSAG00000008836.1;gene_biotype:protein_coding;transcript_biotype:protein_coding;gene_symbol:GRINA;description:glutamate;ionotropic;receptor;NMDA;type;subunit;associated;protein;1;[Source:NCBI;gene;(formerly;Entrezgene);Acc:103237596]
ENSCSAT00000006637.1	4028	3870.51	148.971	264	cdna;chromosome:ChlSab1.1:22:52976872:52992039:-1;gene:ENSCSAG00000008579.1;gene_biotype:protein_coding;transcript_biotype:protein_coding;gene_symbol:SEC61A1;description:SEC61;translocon;subunit;alpha;1;[Source:HGNC;Symbol;Acc:HGNC:18276]
ENSCSAT00000001434.1	1111	953.514	148.886	65	cdna;chromosome:ChlSab1.1:6:37024014:37045737:-1;gene:ENSCSAG00000003404.1;gene_biotype:protein_coding;transcript_biotype:protein_coding;gene_symbol:ETHE1;description:ETHE1;persulfide;dioxygenase;[Source:NCBI;gene;(formerly;Entrezgene);Acc:103234782]
ENSCSAT00000017747.1	1464	1306.51	148.779	89	cdna;chromosome:ChlSab1.1:20:120718424:120723944:1;gene:ENSCSAG00000000787.1;gene_biotype:protein_coding;transcript_biotype:protein_coding;gene_symbol:SRM;description:spermidine;synthase;[Source:HGNC;Symbol;Acc:HGNC:11296]
ENSCSAT00000003037.1	495	337.666	148.767	23	cdna;chromosome:ChlSab1.1:16:45408068:45413398:-1;gene:ENSCSAG00000005011.1;gene_biotype:protein_coding;transcript_biotype:protein_coding;gene_symbol:UBALD2;description:UBA;like;domain;containing;2;[Source:NCBI;gene;(formerly;Entrezgene);Acc:103243003]
ENSCSAT00000009985.1	1567	1409.51	148.754	96	cdna;chromosome:ChlSab1.1:16:6617966:6625342:-1;gene:ENSCSAG00000011895.1;gene_biotype:protein_coding;transcript_biotype:protein_coding;gene_symbol:CTDNEP1;description:CTD;nuclear;envelope;phosphatase;1;[Source:NCBI;gene;(formerly;Entrezgene);Acc:103242284]
ENSCSAT00000005512.1	3642	3484.51	148.55	237	cdna;chromosome:ChlSab1.1:2:89080968:89181848:1;gene:ENSCSAG00000007471.1;gene_biotype:protein_coding;transcript_biotype:protein_coding
ENSCSAT00000012269.1	1219	1061.51	148.372	72.112	cdna;chromosome:ChlSab1.1:21:32167337:32176980:1;gene:ENSCSAG00000014175.1;gene_biotype:protein_coding;transcript_biotype:protein_coding;gene_symbol:HNRNPA2B1;description:heterogeneous;nuclear;ribonucleoprotein;A2/B1;[Source:NCBI;gene;(formerly;Entrezgene);Acc:103226345]
ENSCSAT00000016230.1	3840	3682.51	148.273	250	cdna;chromosome:ChlSab1.1:28:10462859:10494457:-1;gene:ENSCSAG00000018132.1;gene_biotype:protein_coding;transcript_biotype:protein_coding;gene_symbol:YWHAG;description:tyrosine;3-monooxygenase/tryptophan;5-monooxygenase;activation;protein;gamma;[Source:NCBI;gene;(formerly;Entrezgene);Acc:103246662]
ENSCSAT00000004624.1	1131	973.514	148.071	66	cdna;chromosome:ChlSab1.1:6:11426787:11437119:1;gene:ENSCSAG00000006585.1;gene_biotype:protein_coding;transcript_biotype:protein_coding;gene_symbol:GET3;description:guided;entry;of;tail-anchored;proteins;factor;3,;ATPase;[Source:NCBI;gene;(formerly;Entrezgene);Acc:103233986]
ENSCSAT00000015563.1	6959	6801.51	147.713	460	cdna;chromosome:ChlSab1.1:3:88563903:88760411:1;gene:ENSCSAG00000017469.1;gene_biotype:protein_coding;transcript_biotype:protein_coding;gene_symbol:COL4A2;description:collagen;type;IV;alpha;2;chain;[Source:HGNC;Symbol;Acc:HGNC:2203]
ENSCSAT00000018036.1	912	754.527	147.626	51	cdna;chromosome:ChlSab1.1:23:40435002:40435913:-1;gene:ENSCSAG00000000499.1;gene_biotype:protein_coding;transcript_biotype:protein_coding;gene_symbol:HNRNPA0;description:heterogeneous;nuclear;ribonucleoprotein;A0;[Source:NCBI;gene;(formerly;Entrezgene);Acc:103244601]
ENSCSAT00000003445.1	5160	5002.51	147.569	337.999	cdna;chromosome:ChlSab1.1:9:95672648:95689247:1;gene:ENSCSAG00000005411.1;gene_biotype:protein_coding;transcript_biotype:protein_coding;gene_symbol:TRIM8;description:tripartite;motif;containing;8;[Source:NCBI;gene;(formerly;Entrezgene);Acc:103216442]
ENSCSAT00000001572.1	2571	2413.51	147.504	163	cdna;chromosome:ChlSab1.1:6:35582849:35627195:1;gene:ENSCSAG00000003544.1;gene_biotype:protein_coding;transcript_biotype:protein_coding;gene_symbol:HNRNPUL1;description:heterogeneous;nuclear;ribonucleoprotein;U;like;1;[Source:NCBI;gene;(formerly;Entrezgene);Acc:103234726]
ENSCSAT00000016636.1	2038	1880.51	147.501	127	cdna;chromosome:ChlSab1.1:6:46849403:46863845:-1;gene:ENSCSAG00000001892.1;gene_biotype:protein_coding;transcript_biotype:protein_coding;gene_symbol:MBOAT7;description:membrane;bound;O-acyltransferase;domain;containing;7;[Source:HGNC;Symbol;Acc:HGNC:15505]
ENSCSAT00000013016.1	1905	1747.51	147.478	118	cdna;chromosome:ChlSab1.1:4:76392625:76396331:-1;gene:ENSCSAG00000014919.1;gene_biotype:protein_coding;transcript_biotype:protein_coding;gene_symbol:RPS23;description:ribosomal;protein;S23;[Source:NCBI;gene;(formerly;Entrezgene);Acc:103224030]
ENSCSAT00000018952.1	513	355.649	147.386	24	cdna;chromosome:ChlSab1.1:5:34069444:34069956:-1;gene:ENSCSAG00000018862.1;gene_biotype:protein_coding;transcript_biotype:protein_coding;description:translocase;of;inner;mitochondrial;membrane;17A;[Source:NCBI;gene;(formerly;Entrezgene);Acc:103230321]
ENSCSAT00000004800.1	5273	5115.51	147.298	345	cdna;chromosome:ChlSab1.1:1:11008120:11050298:-1;gene:ENSCSAG00000006769.1;gene_biotype:protein_coding;transcript_biotype:protein_coding;gene_symbol:SLC3A2;description:solute;carrier;family;3;member;2;[Source:HGNC;Symbol;Acc:HGNC:11026]
ENSCSAT00000012933.1	1704	1546.51	146.874	104	cdna;chromosome:ChlSab1.1:24:31097538:31101225:-1;gene:ENSCSAG00000014842.1;gene_biotype:protein_coding;transcript_biotype:protein_coding;gene_symbol:BMP4;description:bone;morphogenetic;protein;4;[Source:NCBI;gene;(formerly;Entrezgene);Acc:103229007]
ENSCSAT00000002909.1	812	654.545	146.818	44	cdna;chromosome:ChlSab1.1:16:45821967:45835530:1;gene:ENSCSAG00000004889.1;gene_biotype:protein_coding;transcript_biotype:protein_coding;gene_symbol:WBP2;description:WW;domain;binding;protein;2;[Source:NCBI;gene;(formerly;Entrezgene);Acc:103243029]
ENSCSAT00000003255.1	1586	1428.51	146.776	96	cdna;chromosome:ChlSab1.1:1:36895984:36897757:-1;gene:ENSCSAG00000005219.1;gene_biotype:protein_coding;transcript_biotype:protein_coding
ENSCSAT00000002270.1	1409	1251.51	146.592	84	cdna;chromosome:ChlSab1.1:16:53023963:53042493:-1;gene:ENSCSAG00000004240.1;gene_biotype:protein_coding;transcript_biotype:protein_coding;gene_symbol:PRKAR1A;description:protein;kinase;cAMP-dependent;type;I;regulatory;subunit;alpha;[Source:NCBI;gene;(formerly;Entrezgene);Acc:103243145]
ENSCSAT00000004630.1	441	283.709	146.267	19	cdna;chromosome:ChlSab1.1:11:43993272:44000177:1;gene:ENSCSAG00000006591.1;gene_biotype:protein_coding;transcript_biotype:protein_coding;gene_symbol:SLC48A1;description:solute;carrier;family;48;member;1;[Source:NCBI;gene;(formerly;Entrezgene);Acc:103238209]
ENSCSAT00000009441.1	576	418.61	146.088	28	cdna;chromosome:ChlSab1.1:15:46396542:46397119:1;gene:ENSCSAG00000011355.1;gene_biotype:pseudogene;transcript_biotype:pseudogene
ENSCSAT00000007520.1	2146	1988.51	146.08	133	cdna;chromosome:ChlSab1.1:17:39114700:39122051:-1;gene:ENSCSAG00000009445.1;gene_biotype:protein_coding;transcript_biotype:protein_coding;gene_symbol:BRD2;description:bromodomain;containing;2;[Source:HGNC;Symbol;Acc:HGNC:1103]
ENSCSAT00000001847.1	2401	2243.51	146.026	150	cdna;chromosome:ChlSab1.1:16:59374889:59410857:-1;gene:ENSCSAG00000003817.1;gene_biotype:protein_coding;transcript_biotype:protein_coding;description:integrin;subunit;beta;3;[Source:NCBI;gene;(formerly;Entrezgene);Acc:103243277]
ENSCSAT00000016663.1	1173	1015.51	145.714	67.752	cdna;chromosome:ChlSab1.1:20:10139107:10147009:1;gene:ENSCSAG00000001866.1;gene_biotype:protein_coding;transcript_biotype:protein_coding
ENSCSAT00000007435.1	3249	3091.51	145.533	206	cdna;chromosome:ChlSab1.1:1:4137814:4176446:-1;gene:ENSCSAG00000009367.1;gene_biotype:protein_coding;transcript_biotype:protein_coding;gene_symbol:CTTN;description:cortactin;[Source:NCBI;gene;(formerly;Entrezgene);Acc:103245464]
ENSCSAT00000008290.1	4738	4580.51	145.429	305	cdna;chromosome:ChlSab1.1:23:70515173:70684971:1;gene:ENSCSAG00000010203.1;gene_biotype:protein_coding;transcript_biotype:protein_coding;gene_symbol:WWC1;description:WW;and;C2;domain;containing;1;[Source:HGNC;Symbol;Acc:HGNC:29435]
ENSCSAT00000011478.1	2007	1849.51	145.249	123	cdna;chromosome:ChlSab1.1:23:38113195:38168382:-1;gene:ENSCSAG00000013390.1;gene_biotype:protein_coding;transcript_biotype:protein_coding;gene_symbol:MACROH2A1;description:core;histone;macro-H2A.1;[Source:NCBI;gene;(formerly;Entrezgene);Acc:103244568]
ENSCSAT00000005421.1	3201	3043.51	144.958	202	cdna;chromosome:ChlSab1.1:19:20198878:20227321:-1;gene:ENSCSAG00000007419.1;gene_biotype:protein_coding;transcript_biotype:protein_coding;gene_symbol:CARD10;description:caspase;recruitment;domain;family;member;10;[Source:HGNC;Symbol;Acc:HGNC:16422]
ENSCSAT00000011830.1	4202	4044.51	144.722	268	cdna;chromosome:ChlSab1.1:2:25585865:25624280:1;gene:ENSCSAG00000013732.1;gene_biotype:protein_coding;transcript_biotype:protein_coding;gene_symbol:TGM2;description:transglutaminase;2;[Source:NCBI;gene;(formerly;Entrezgene);Acc:103246306]
ENSCSAT00000007998.1	5736	5578.51	144.413	368.857	cdna;chromosome:ChlSab1.1:6:5346426:5371507:-1;gene:ENSCSAG00000009918.1;gene_biotype:protein_coding;transcript_biotype:protein_coding;gene_symbol:LONP1;description:lon;peptidase;1,;mitochondrial;[Source:NCBI;gene;(formerly;Entrezgene);Acc:103233746]
ENSCSAT00000008645.1	627	469.593	144.181	31	cdna;chromosome:ChlSab1.1:11:6532431:6533536:-1;gene:ENSCSAG00000010565.1;gene_biotype:protein_coding;transcript_biotype:protein_coding;gene_symbol:MRPL51;description:mitochondrial;ribosomal;protein;L51;[Source:NCBI;gene;(formerly;Entrezgene);Acc:103218456]
ENSCSAT00000001418.1	1287	1129.51	144.116	74.531	cdna;chromosome:ChlSab1.1:16:63261534:63274557:1;gene:ENSCSAG00000003390.1;gene_biotype:protein_coding;transcript_biotype:protein_coding;gene_symbol:VAT1;description:vesicle;amine;transport;1;[Source:NCBI;gene;(formerly;Entrezgene);Acc:103243371]
ENSCSAT00000000652.1	5857	5699.51	143.701	375	cdna;chromosome:ChlSab1.1:16:67680018:67732938:-1;gene:ENSCSAG00000002632.1;gene_biotype:protein_coding;transcript_biotype:protein_coding;gene_symbol:ARHGAP23;description:Rho;GTPase;activating;protein;23;[Source:NCBI;gene;(formerly;Entrezgene);Acc:103243571]
ENSCSAT00000005068.1	3533	3375.51	143.641	222	cdna;chromosome:ChlSab1.1:21:117574427:117601960:-1;gene:ENSCSAG00000007026.1;gene_biotype:protein_coding;transcript_biotype:protein_coding;gene_symbol:PDIA4;description:protein;disulfide;isomerase;family;A;member;4;[Source:NCBI;gene;(formerly;Entrezgene);Acc:103227184]
ENSCSAT00000002400.1	6149	5991.51	143.624	394	cdna;chromosome:ChlSab1.1:5:53673455:53725615:1;gene:ENSCSAG00000004371.1;gene_biotype:protein_coding;transcript_biotype:protein_coding;gene_symbol:SF3B3;description:splicing;factor;3b;subunit;3;[Source:NCBI;gene;(formerly;Entrezgene);Acc:103233159]
ENSCSAT00000010409.1	1816	1658.51	143.54	109	cdna;chromosome:ChlSab1.1:12:27179747:27289764:1;gene:ENSCSAG00000012316.1;gene_biotype:protein_coding;transcript_biotype:protein_coding;gene_symbol:PTBP3;description:polypyrimidine;tract;binding;protein;3;[Source:NCBI;gene;(formerly;Entrezgene);Acc:103219009]
ENSCSAT00000002476.1	3019	2861.51	143.492	188	cdna;chromosome:ChlSab1.1:11:60092482:60131948:1;gene:ENSCSAG00000004475.1;gene_biotype:protein_coding;transcript_biotype:protein_coding;gene_symbol:XPOT;description:exportin;for;tRNA;[Source:NCBI;gene;(formerly;Entrezgene);Acc:103238640]
ENSCSAT00000012603.1	1346	1188.51	143.337	78	cdna;chromosome:ChlSab1.1:12:9131929:9149032:1;gene:ENSCSAG00000014507.1;gene_biotype:protein_coding;transcript_biotype:protein_coding;gene_symbol:SH3GLB2;description:SH3;domain;containing;GRB2;like,;endophilin;B2;[Source:NCBI;gene;(formerly;Entrezgene);Acc:103239778]
ENSCSAT00000009602.1	1546	1388.51	143.139	91	cdna;chromosome:ChlSab1.1:6:2248583:2250889:1;gene:ENSCSAG00000011516.1;gene_biotype:protein_coding;transcript_biotype:protein_coding;gene_symbol:GADD45B;description:growth;arrest;and;DNA;damage;inducible;beta;[Source:NCBI;gene;(formerly;Entrezgene);Acc:103233650]
ENSCSAT00000007948.1	2235	2077.51	142.976	136	cdna;chromosome:ChlSab1.1:14:80205458:80230424:1;gene:ENSCSAG00000009870.1;gene_biotype:protein_coding;transcript_biotype:protein_coding;gene_symbol:PPM1G;description:protein;phosphatase,;Mg2+/Mn2+;dependent;1G;[Source:NCBI;gene;(formerly;Entrezgene);Acc:103220595]
ENSCSAT00000012714.1	3445	3287.51	142.971	215.204	cdna;chromosome:ChlSab1.1:25:24016930:24036641:1;gene:ENSCSAG00000014618.1;gene_biotype:protein_coding;transcript_biotype:protein_coding;gene_symbol:NUAK2;description:NUAK;family;kinase;2;[Source:NCBI;gene;(formerly;Entrezgene);Acc:103230233]
ENSCSAT00000018346.1	894	736.537	142.581	48.083	cdna;chromosome:ChlSab1.1:13:26323003:26323896:-1;gene:ENSCSAG00000000189.1;gene_biotype:protein_coding;transcript_biotype:protein_coding
ENSCSAT00000010621.1	941	783.518	142.164	51	cdna;chromosome:ChlSab1.1:24:51685609:51700557:-1;gene:ENSCSAG00000012527.1;gene_biotype:protein_coding;transcript_biotype:protein_coding;gene_symbol:NPC2;description:NPC;intracellular;cholesterol;transporter;2;[Source:NCBI;gene;(formerly;Entrezgene);Acc:103229330]
ENSCSAT00000009225.1	512	354.65	141.643	23	cdna;chromosome:ChlSab1.1:16:7244227:7245081:-1;gene:ENSCSAG00000011136.1;gene_biotype:protein_coding;transcript_biotype:protein_coding;gene_symbol:NAA38;description:N-alpha-acetyltransferase;38,;NatC;auxiliary;subunit;[Source:NCBI;gene;(formerly;Entrezgene);Acc:103242328]
ENSCSAT00000008452.1	8290	8132.51	141.531	527	cdna;chromosome:ChlSab1.1:5:2571109:2585640:-1;gene:ENSCSAG00000010365.1;gene_biotype:protein_coding;transcript_biotype:protein_coding;gene_symbol:SRRM2;description:serine/arginine;repetitive;matrix;2;[Source:NCBI;gene;(formerly;Entrezgene);Acc:103226935]
ENSCSAT00000005554.1	2604	2446.51	141.051	158	cdna;chromosome:ChlSab1.1:2:88559285:88585091:-1;gene:ENSCSAG00000007510.1;gene_biotype:protein_coding;transcript_biotype:protein_coding;gene_symbol:PTTG1IP;description:PTTG1;interacting;protein;[Source:NCBI;gene;(formerly;Entrezgene);Acc:103220001]
ENSCSAT00000016261.1	2266	2108.51	140.873	136	cdna;chromosome:ChlSab1.1:18:20985819:21054554:-1;gene:ENSCSAG00000018162.1;gene_biotype:protein_coding;transcript_biotype:protein_coding;gene_symbol:MALT1;description:MALT1;paracaspase;[Source:HGNC;Symbol;Acc:HGNC:6819]
ENSCSAT00000017834.1	3795	3637.51	140.501	234	cdna;chromosome:ChlSab1.1:20:129707085:129766667:1;gene:ENSCSAG00000000701.1;gene_biotype:protein_coding;transcript_biotype:protein_coding;gene_symbol:GNB1;description:G;protein;subunit;beta;1;[Source:NCBI;gene;(formerly;Entrezgene);Acc:103225777]
ENSCSAT00000004780.1	546	388.632	140.498	25	cdna;chromosome:ChlSab1.1:5:21358584:21384845:1;gene:ENSCSAG00000006743.1;gene_biotype:protein_coding;transcript_biotype:protein_coding;gene_symbol:DCTN5;description:dynactin;subunit;5;[Source:NCBI;gene;(formerly;Entrezgene);Acc:103229803]
ENSCSAT00000007285.1	12561	12403.5	140.34	797	cdna;chromosome:ChlSab1.1:17:39919772:39986868:1;gene:ENSCSAG00000009220.1;gene_biotype:protein_coding;transcript_biotype:protein_coding;gene_symbol:TNXB;description:tenascin;XB;[Source:HGNC;Symbol;Acc:HGNC:11976]
ENSCSAT00000000890.1	2228	2070.51	140.294	133	cdna;chromosome:ChlSab1.1:6:41640636:41650080:-1;gene:ENSCSAG00000002863.1;gene_biotype:protein_coding;transcript_biotype:protein_coding;gene_symbol:KDELR1;description:KDEL;endoplasmic;reticulum;protein;retention;receptor;1;[Source:NCBI;gene;(formerly;Entrezgene);Acc:103234972]
ENSCSAT00000008261.1	1653	1495.51	140.2	96	cdna;chromosome:ChlSab1.1:8:119102917:119113950:1;gene:ENSCSAG00000010175.1;gene_biotype:protein_coding;transcript_biotype:protein_coding;gene_symbol:NDUFB9;description:NADH:ubiquinone;oxidoreductase;subunit;B9;[Source:NCBI;gene;(formerly;Entrezgene);Acc:103237406]
ENSCSAT00000003163.1	2496	2338.51	140.094	150	cdna;chromosome:ChlSab1.1:16:44489852:44565853:-1;gene:ENSCSAG00000005133.1;gene_biotype:protein_coding;transcript_biotype:protein_coding;gene_symbol:SEC14L1;description:SEC14;like;lipid;binding;1;[Source:HGNC;Symbol;Acc:HGNC:10698]
ENSCSAT00000001085.1	2559	2401.51	140.056	154	cdna;chromosome:ChlSab1.1:11:99119224:99139722:1;gene:ENSCSAG00000003114.1;gene_biotype:protein_coding;transcript_biotype:protein_coding;gene_symbol:HSP90B1;description:heat;shock;protein;90;beta;family;member;1;[Source:NCBI;gene;(formerly;Entrezgene);Acc:103238976]
ENSCSAT00000005707.1	1875	1717.51	139.881	110	cdna;chromosome:ChlSab1.1:11:26723834:26764877:-1;gene:ENSCSAG00000007661.1;gene_biotype:protein_coding;transcript_biotype:protein_coding;gene_symbol:TM7SF3;description:transmembrane;7;superfamily;member;3;[Source:NCBI;gene;(formerly;Entrezgene);Acc:103218779]
ENSCSAT00000007652.1	135	31.266	139.71	2	cdna;chromosome:ChlSab1.1:X:90498057:90499132:-1;gene:ENSCSAG00000009567.1;gene_biotype:protein_coding;transcript_biotype:protein_coding;description:thymosin;beta;15a;[Source:NCBI;gene;(formerly;Entrezgene);Acc:103232393]
ENSCSAT00000005406.1	1487	1329.51	139.635	85	cdna;chromosome:ChlSab1.1:6:9304913:9314220:1;gene:ENSCSAG00000007362.1;gene_biotype:protein_coding;transcript_biotype:protein_coding;gene_symbol:MRPL4;description:mitochondrial;ribosomal;protein;L4;[Source:NCBI;gene;(formerly;Entrezgene);Acc:103233891]
ENSCSAT00000011687.1	2004	1846.51	139.571	118	cdna;chromosome:ChlSab1.1:8:68898693:68901812:-1;gene:ENSCSAG00000013590.1;gene_biotype:protein_coding;transcript_biotype:protein_coding
ENSCSAT00000001604.1	4437	4279.51	139.327	273	cdna;chromosome:ChlSab1.1:11:91556333:91633592:1;gene:ENSCSAG00000003573.1;gene_biotype:protein_coding;transcript_biotype:protein_coding;gene_symbol:ELK3;description:ETS;transcription;factor;ELK3;[Source:NCBI;gene;(formerly;Entrezgene);Acc:103238906]
ENSCSAT00000000236.1	2274	2116.51	139.309	135	cdna;chromosome:ChlSab1.1:16:73740944:73745062:-1;gene:ENSCSAG00000002218.1;gene_biotype:protein_coding;transcript_biotype:protein_coding;gene_symbol:ARHGDIA;description:Rho;GDP;dissociation;inhibitor;alpha;[Source:HGNC;Symbol;Acc:HGNC:678]
ENSCSAT00000012817.1	2889	2731.51	139.127	174	cdna;chromosome:ChlSab1.1:26:6225610:6251896:1;gene:ENSCSAG00000014721.1;gene_biotype:protein_coding;transcript_biotype:protein_coding;gene_symbol:TSPAN3;description:tetraspanin;3;[Source:NCBI;gene;(formerly;Entrezgene);Acc:103245273]
ENSCSAT00000016626.1	1807	1649.51	139.027	105	cdna;chromosome:ChlSab1.1:6:46793455:46808948:1;gene:ENSCSAG00000001903.1;gene_biotype:protein_coding;transcript_biotype:protein_coding;gene_symbol:PRPF31;description:pre-mRNA;processing;factor;31;[Source:NCBI;gene;(formerly;Entrezgene);Acc:103235240]
ENSCSAT00000002836.1	1556	1398.51	138.992	89	cdna;chromosome:ChlSab1.1:11:53439249:53456267:-1;gene:ENSCSAG00000004807.1;gene_biotype:protein_coding;transcript_biotype:protein_coding;gene_symbol:DCTN2;description:dynactin;subunit;2;[Source:NCBI;gene;(formerly;Entrezgene);Acc:103238574]
ENSCSAT00000010573.1	3302	3144.51	138.913	200	cdna;chromosome:ChlSab1.1:6:765587:777399:-1;gene:ENSCSAG00000012483.1;gene_biotype:protein_coding;transcript_biotype:protein_coding;gene_symbol:TMEM259;description:transmembrane;protein;259;[Source:NCBI;gene;(formerly;Entrezgene);Acc:103233588]
ENSCSAT00000010342.1	3836	3678.51	138.341	233	cdna;chromosome:ChlSab1.1:6:1018290:1027618:1;gene:ENSCSAG00000012251.1;gene_biotype:protein_coding;transcript_biotype:protein_coding;gene_symbol:MIDN;description:midnolin;[Source:NCBI;gene;(formerly;Entrezgene);Acc:103233596]
ENSCSAT00000010202.1	2544	2386.51	138.191	151	cdna;chromosome:ChlSab1.1:2:38579024:38601208:-1;gene:ENSCSAG00000012115.1;gene_biotype:protein_coding;transcript_biotype:protein_coding;gene_symbol:AHCY;description:adenosylhomocysteinase;[Source:NCBI;gene;(formerly;Entrezgene);Acc:103248746]
ENSCSAT00000011790.1	617	459.594	137.813	29	cdna;chromosome:ChlSab1.1:23:35684495:35685670:1;gene:ENSCSAG00000013694.1;gene_biotype:protein_coding;transcript_biotype:protein_coding;gene_symbol:UQCRQ;description:ubiquinol-cytochrome;c;reductase;complex;III;subunit;VII;[Source:NCBI;gene;(formerly;Entrezgene);Acc:103244527]
ENSCSAT00000008653.1	1937	1779.51	137.462	112	cdna;chromosome:ChlSab1.1:22:45799645:45814870:1;gene:ENSCSAG00000010569.1;gene_biotype:protein_coding;transcript_biotype:protein_coding;gene_symbol:ARPC4;description:actin;related;protein;2/3;complex;subunit;4;[Source:NCBI;gene;(formerly;Entrezgene);Acc:103227981]
ENSCSAT00000003817.1	7536	7378.51	137.305	463.86	cdna;chromosome:ChlSab1.1:10:127288331:127378986:-1;gene:ENSCSAG00000005781.1;gene_biotype:protein_coding;transcript_biotype:protein_coding;gene_symbol:HDLBP;description:high;density;lipoprotein;binding;protein;[Source:HGNC;Symbol;Acc:HGNC:4857]
ENSCSAT00000009817.1	1701	1543.51	137.255	97	cdna;chromosome:ChlSab1.1:25:55706885:55718665:-1;gene:ENSCSAG00000011726.1;gene_biotype:protein_coding;transcript_biotype:protein_coding;gene_symbol:PRDX6;description:peroxiredoxin;6;[Source:HGNC;Symbol;Acc:HGNC:16753]
ENSCSAT00000008192.1	2736	2578.51	137.218	162	cdna;chromosome:ChlSab1.1:8:122282630:122288384:1;gene:ENSCSAG00000010109.1;gene_biotype:protein_coding;transcript_biotype:protein_coding;gene_symbol:MYC;description:MYC;proto-oncogene,;bHLH;transcription;factor;[Source:NCBI;gene;(formerly;Entrezgene);Acc:103237430]
ENSCSAT00000008210.1	1119	961.514	136.29	60	cdna;chromosome:ChlSab1.1:8:120014339:120019887:1;gene:ENSCSAG00000010133.1;gene_biotype:protein_coding;transcript_biotype:protein_coding;gene_symbol:TRIB1;description:tribbles;pseudokinase;1;[Source:NCBI;gene;(formerly;Entrezgene);Acc:103237416]
ENSCSAT00000002688.1	1164	1006.51	136.101	62.721	cdna;chromosome:ChlSab1.1:6:29211785:29266981:1;gene:ENSCSAG00000004663.1;gene_biotype:protein_coding;transcript_biotype:protein_coding;gene_symbol:LSM14A;description:LSM14A;mRNA;processing;body;assembly;factor;[Source:HGNC;Symbol;Acc:HGNC:24489]
ENSCSAT00000013242.1	317	160.753	135.865	10	cdna;chromosome:ChlSab1.1:14:36826779:36837137:1;gene:ENSCSAG00000015147.1;gene_biotype:protein_coding;transcript_biotype:protein_coding;description:small;nuclear;ribonucleoprotein;polypeptide;G;[Source:NCBI;gene;(formerly;Entrezgene);Acc:103220095]
ENSCSAT00000011055.1	2312	2154.51	135.838	134	cdna;chromosome:ChlSab1.1:2:34483771:34494071:1;gene:ENSCSAG00000012961.1;gene_biotype:protein_coding;transcript_biotype:protein_coding;gene_symbol:CDC25B;description:cell;division;cycle;25B;[Source:HGNC;Symbol;Acc:HGNC:1726]
ENSCSAT00000009831.1	978	820.515	135.753	51	cdna;chromosome:ChlSab1.1:24:54769340:54823210:-1;gene:ENSCSAG00000011741.1;gene_biotype:protein_coding;transcript_biotype:protein_coding;gene_symbol:SPTLC2;description:serine;palmitoyltransferase;long;chain;base;subunit;2;[Source:HGNC;Symbol;Acc:HGNC:11278]
ENSCSAT00000009794.1	1381	1223.51	135.666	76	cdna;chromosome:ChlSab1.1:8:102915252:102960559:-1;gene:ENSCSAG00000011703.1;gene_biotype:protein_coding;transcript_biotype:protein_coding;gene_symbol:EIF3E;description:eukaryotic;translation;initiation;factor;3;subunit;E;[Source:HGNC;Symbol;Acc:HGNC:3277]
ENSCSAT00000004285.1	3024	2866.51	135.623	178	cdna;chromosome:ChlSab1.1:10:121054665:121073708:1;gene:ENSCSAG00000006235.1;gene_biotype:protein_coding;transcript_biotype:protein_coding;gene_symbol:SH3BP4;description:SH3;domain;binding;protein;4;[Source:NCBI;gene;(formerly;Entrezgene);Acc:103218133]
ENSCSAT00000007429.1	803	645.545	135.332	40	cdna;chromosome:ChlSab1.1:23:78396413:78420819:-1;gene:ENSCSAG00000009357.1;gene_biotype:protein_coding;transcript_biotype:protein_coding;gene_symbol:CLTB;description:clathrin;light;chain;B;[Source:NCBI;gene;(formerly;Entrezgene);Acc:103245028]
ENSCSAT00000002795.1	2785	2627.51	135.322	162.797	cdna;chromosome:ChlSab1.1:1:47883086:47887951:1;gene:ENSCSAG00000004762.1;gene_biotype:protein_coding;transcript_biotype:protein_coding;gene_symbol:RPS13;description:ribosomal;protein;S13;[Source:HGNC;Symbol;Acc:HGNC:10386]
ENSCSAT00000009936.1	1096	938.514	134.975	58	cdna;chromosome:ChlSab1.1:17:28642586:28647273:1;gene:ENSCSAG00000011892.1;gene_biotype:protein_coding;transcript_biotype:protein_coding;gene_symbol:YIPF3;description:Yip1;domain;family;member;3;[Source:NCBI;gene;(formerly;Entrezgene);Acc:103221459]
ENSCSAT00000003418.1	660	502.582	134.717	31	cdna;chromosome:ChlSab1.1:6:16668141:16670676:1;gene:ENSCSAG00000005386.1;gene_biotype:protein_coding;transcript_biotype:protein_coding;gene_symbol:MPV17L2;description:MPV17;mitochondrial;inner;membrane;protein;like;2;[Source:NCBI;gene;(formerly;Entrezgene);Acc:103234169]
ENSCSAT00000000145.1	2363	2205.51	134.678	136	cdna;chromosome:ChlSab1.1:20:7518846:7545677:1;gene:ENSCSAG00000002128.1;gene_biotype:protein_coding;transcript_biotype:protein_coding;gene_symbol:CCT3;description:chaperonin;containing;TCP1;subunit;3;[Source:NCBI;gene;(formerly;Entrezgene);Acc:103223850]
ENSCSAT00000013077.1	3115	2957.51	134.404	182	cdna;chromosome:ChlSab1.1:2:14804791:14878838:1;gene:ENSCSAG00000014986.1;gene_biotype:protein_coding;transcript_biotype:protein_coding;gene_symbol:STAU1;description:staufen;double-stranded;RNA;binding;protein;1;[Source:NCBI;gene;(formerly;Entrezgene);Acc:103244584]
ENSCSAT00000014046.1	2205	2047.51	134.403	126	cdna;chromosome:ChlSab1.1:12:1348742:1379518:-1;gene:ENSCSAG00000015993.1;gene_biotype:protein_coding;transcript_biotype:protein_coding;gene_symbol:RABL6;description:RAB,;member;RAS;oncogene;family;like;6;[Source:HGNC;Symbol;Acc:HGNC:24703]
ENSCSAT00000013767.1	401	243.784	134.386	15	cdna;chromosome:ChlSab1.1:27:46719538:46721230:-1;gene:ENSCSAG00000015674.1;gene_biotype:protein_coding;transcript_biotype:protein_coding;gene_symbol:C4orf48;description:chromosome;4;open;reading;frame;48;[Source:HGNC;Symbol;Acc:HGNC:34437]
ENSCSAT00000019190.1	645	487.585	134.381	30	cdna;chromosome:ChlSab1.1:17:46237985:46238629:1;gene:ENSCSAG00000019100.1;gene_biotype:protein_coding;transcript_biotype:protein_coding;gene_symbol:H1-1;description:H1.1;linker;histone,;cluster;member;[Source:NCBI;gene;(formerly;Entrezgene);Acc:103222024]
ENSCSAT00000017046.1	2273	2115.51	134.213	130	cdna;chromosome:ChlSab1.1:20:38325848:38356760:1;gene:ENSCSAG00000001487.1;gene_biotype:protein_coding;transcript_biotype:protein_coding;gene_symbol:CNN3;description:calponin;3;[Source:NCBI;gene;(formerly;Entrezgene);Acc:103224399]
ENSCSAT00000003803.1	2241	2083.51	134.178	128	cdna;chromosome:ChlSab1.1:6:14705089:14743702:1;gene:ENSCSAG00000005766.1;gene_biotype:protein_coding;transcript_biotype:protein_coding;gene_symbol:AP1M1;description:adaptor;related;protein;complex;1;subunit;mu;1;[Source:NCBI;gene;(formerly;Entrezgene);Acc:103234103]
ENSCSAT00000009860.1	744	586.566	133.413	35.83	cdna;chromosome:ChlSab1.1:12:29295937:29301530:1;gene:ENSCSAG00000011770.1;gene_biotype:protein_coding;transcript_biotype:protein_coding
ENSCSAT00000001160.1	3203	3045.51	133.389	186	cdna;chromosome:ChlSab1.1:5:72780300:72863860:-1;gene:ENSCSAG00000003131.1;gene_biotype:protein_coding;transcript_biotype:protein_coding;gene_symbol:ZCCHC14;description:zinc;finger;CCHC-type;containing;14;[Source:NCBI;gene;(formerly;Entrezgene);Acc:103233427]
ENSCSAT00000006311.1	747	589.564	133.364	36	cdna;chromosome:ChlSab1.1:9:61144503:61154226:1;gene:ENSCSAG00000008263.1;gene_biotype:protein_coding;transcript_biotype:protein_coding;gene_symbol:SAR1A;description:secretion;associated;Ras;related;GTPase;1A;[Source:NCBI;gene;(formerly;Entrezgene);Acc:103216060]
ENSCSAT00000009348.1	3598	3440.51	133.31	210	cdna;chromosome:ChlSab1.1:11:2920663:2940823:-1;gene:ENSCSAG00000011261.1;gene_biotype:protein_coding;transcript_biotype:protein_coding;gene_symbol:FOXM1;description:forkhead;box;M1;[Source:NCBI;gene;(formerly;Entrezgene);Acc:103218389]
ENSCSAT00000011489.1	1585	1427.51	133.108	87	cdna;chromosome:ChlSab1.1:2:32948196:32953991:1;gene:ENSCSAG00000013400.1;gene_biotype:protein_coding;transcript_biotype:protein_coding;gene_symbol:PCNA;description:proliferating;cell;nuclear;antigen;[Source:NCBI;gene;(formerly;Entrezgene);Acc:103246929]
ENSCSAT00000007157.1	2326	2168.51	132.947	132	cdna;chromosome:ChlSab1.1:10:101953067:102049964:1;gene:ENSCSAG00000009095.1;gene_biotype:protein_coding;transcript_biotype:protein_coding;gene_symbol:XRCC5;description:X-ray;repair;cross;complementing;5;[Source:HGNC;Symbol;Acc:HGNC:12833]
ENSCSAT00000012681.1	3584	3426.51	132.693	208.178	cdna;chromosome:ChlSab1.1:2:17984310:17993489:-1;gene:ENSCSAG00000014583.1;gene_biotype:protein_coding;transcript_biotype:protein_coding;gene_symbol:CTSA;description:cathepsin;A;[Source:NCBI;gene;(formerly;Entrezgene);Acc:103245139]
ENSCSAT00000002054.1	1213	1055.51	132.429	64	cdna;chromosome:ChlSab1.1:6:33263098:33281517:1;gene:ENSCSAG00000004026.1;gene_biotype:protein_coding;transcript_biotype:protein_coding;gene_symbol:EIF3K;description:eukaryotic;translation;initiation;factor;3;subunit;K;[Source:NCBI;gene;(formerly;Entrezgene);Acc:103234636]
ENSCSAT00000001562.1	5140	4982.51	132.307	301.831	cdna;chromosome:ChlSab1.1:6:35648677:35674365:-1;gene:ENSCSAG00000003530.1;gene_biotype:protein_coding;transcript_biotype:protein_coding;gene_symbol:TGFB1;description:transforming;growth;factor;beta;1;[Source:HGNC;Symbol;Acc:HGNC:11766]
ENSCSAT00000017731.1	405	247.772	132.223	15	cdna;chromosome:ChlSab1.1:20:119932021:119933197:1;gene:ENSCSAG00000000803.1;gene_biotype:protein_coding;transcript_biotype:protein_coding;gene_symbol:NPPB;description:natriuretic;peptide;B;[Source:NCBI;gene;(formerly;Entrezgene);Acc:103225595]
ENSCSAT00000015469.1	5116	4958.51	132.141	300	cdna;chromosome:ChlSab1.1:14:611299:636499:-1;gene:ENSCSAG00000017374.1;gene_biotype:protein_coding;transcript_biotype:protein_coding;gene_symbol:STARD7;description:StAR;related;lipid;transfer;domain;containing;7;[Source:NCBI;gene;(formerly;Entrezgene);Acc:103241065]
ENSCSAT00000003291.1	1199	1041.51	132.112	63	cdna;chromosome:ChlSab1.1:1:32595397:32614615:-1;gene:ENSCSAG00000005261.1;gene_biotype:protein_coding;transcript_biotype:protein_coding;gene_symbol:EIF3M;description:eukaryotic;translation;initiation;factor;3;subunit;M;[Source:NCBI;gene;(formerly;Entrezgene);Acc:103238097]
ENSCSAT00000018093.1	882	724.541	131.914	43.761	cdna;chromosome:ChlSab1.1:12:52783462:52784343:-1;gene:ENSCSAG00000000442.1;gene_biotype:protein_coding;transcript_biotype:protein_coding
ENSCSAT00000004344.1	3770	3612.51	131.799	218	cdna;chromosome:ChlSab1.1:5:26230488:26245334:-1;gene:ENSCSAG00000006306.1;gene_biotype:protein_coding;transcript_biotype:protein_coding;gene_symbol:ATXN2L;description:ataxin;2;like;[Source:HGNC;Symbol;Acc:HGNC:31326]
ENSCSAT00000000262.1	638	480.587	131.793	29	cdna;chromosome:ChlSab1.1:11:115932394:115934562:-1;gene:ENSCSAG00000002246.1;gene_biotype:protein_coding;transcript_biotype:protein_coding;gene_symbol:POP5;description:POP5;homolog,;ribonuclease;P/MRP;subunit;[Source:NCBI;gene;(formerly;Entrezgene);Acc:103239262]
ENSCSAT00000000587.1	5052	4894.51	131.637	295	cdna;chromosome:ChlSab1.1:1:110002591:110052831:1;gene:ENSCSAG00000002568.1;gene_biotype:protein_coding;transcript_biotype:protein_coding;gene_symbol:PHLDB1;description:pleckstrin;homology;like;domain;family;B;member;1;[Source:HGNC;Symbol;Acc:HGNC:23697]
ENSCSAT00000003174.1	4425	4267.51	131.53	257	cdna;chromosome:ChlSab1.1:5:42275584:42334207:-1;gene:ENSCSAG00000005139.1;gene_biotype:protein_coding;transcript_biotype:protein_coding;gene_symbol:AMFR;description:autocrine;motility;factor;receptor;[Source:HGNC;Symbol;Acc:HGNC:463]
ENSCSAT00000015532.1	3798	3640.51	131.386	219	cdna;chromosome:ChlSab1.1:3:91295681:91321333:1;gene:ENSCSAG00000017436.1;gene_biotype:protein_coding;transcript_biotype:protein_coding;gene_symbol:LAMP1;description:lysosomal;associated;membrane;protein;1;[Source:NCBI;gene;(formerly;Entrezgene);Acc:103214841]
ENSCSAT00000008566.1	288	133.06	131.313	8	cdna;chromosome:ChlSab1.1:6:4378473:4389660:-1;gene:ENSCSAG00000010483.1;gene_biotype:protein_coding;transcript_biotype:protein_coding
ENSCSAT00000003173.1	1707	1549.51	131.085	93	cdna;chromosome:ChlSab1.1:16:44213623:44310524:-1;gene:ENSCSAG00000005146.1;gene_biotype:protein_coding;transcript_biotype:protein_coding;gene_symbol:SEPTIN9;description:septin;9;[Source:HGNC;Symbol;Acc:HGNC:7323]
ENSCSAT00000012495.1	1175	1017.51	130.935	61	cdna;chromosome:ChlSab1.1:X:22231855:22235031:1;gene:ENSCSAG00000014398.1;gene_biotype:protein_coding;transcript_biotype:protein_coding;gene_symbol:SAT1;description:spermidine/spermine;N1-acetyltransferase;1;[Source:NCBI;gene;(formerly;Entrezgene);Acc:103231716]
ENSCSAT00000005257.1	6180	6022.51	130.917	361	cdna;chromosome:ChlSab1.1:16:22383677:22412701:-1;gene:ENSCSAG00000007215.1;gene_biotype:protein_coding;transcript_biotype:protein_coding;gene_symbol:KIAA0100;description:KIAA0100;[Source:HGNC;Symbol;Acc:HGNC:28960]
ENSCSAT00000003422.1	1142	984.514	130.887	59	cdna;chromosome:ChlSab1.1:6:16644392:16649751:1;gene:ENSCSAG00000005389.1;gene_biotype:protein_coding;transcript_biotype:protein_coding;gene_symbol:IFI30;description:IFI30;lysosomal;thiol;reductase;[Source:NCBI;gene;(formerly;Entrezgene);Acc:103234168]
ENSCSAT00000001516.1	1276	1118.51	130.828	67	cdna;chromosome:ChlSab1.1:16:62315624:62321512:-1;gene:ENSCSAG00000003490.1;gene_biotype:protein_coding;transcript_biotype:protein_coding;gene_symbol:G6PC3;description:glucose-6-phosphatase;catalytic;subunit;3;[Source:NCBI;gene;(formerly;Entrezgene);Acc:103243337]
ENSCSAT00000014578.1	693	535.574	130.496	32	cdna;chromosome:ChlSab1.1:25:1579610:1587419:-1;gene:ENSCSAG00000016494.1;gene_biotype:protein_coding;transcript_biotype:protein_coding;description:guanylate;kinase;1;[Source:NCBI;gene;(formerly;Entrezgene);Acc:103229963]
ENSCSAT00000000645.1	1354	1196.51	130.467	71.474	cdna;chromosome:ChlSab1.1:11:105876778:105878272:-1;gene:ENSCSAG00000002626.1;gene_biotype:protein_coding;transcript_biotype:protein_coding
ENSCSAT00000002287.1	375	217.906	130.299	13	cdna;chromosome:ChlSab1.1:6:31020151:31021237:-1;gene:ENSCSAG00000004254.1;gene_biotype:protein_coding;transcript_biotype:protein_coding;gene_symbol:POLR2I;description:RNA;polymerase;II;subunit;I;[Source:NCBI;gene;(formerly;Entrezgene);Acc:103234557]
ENSCSAT00000013975.1	510	352.651	130.059	21	cdna;chromosome:ChlSab1.1:4:65165464:65165995:-1;gene:ENSCSAG00000015881.1;gene_biotype:protein_coding;transcript_biotype:protein_coding
ENSCSAT00000012361.1	755	597.561	129.994	35.566	cdna;chromosome:ChlSab1.1:16:483521:491885:1;gene:ENSCSAG00000014265.1;gene_biotype:protein_coding;transcript_biotype:protein_coding;gene_symbol:TLCD3A;description:TLC;domain;containing;3A;[Source:HGNC;Symbol;Acc:HGNC:29646]
ENSCSAT00000006907.1	3591	3433.51	129.765	204	cdna;chromosome:ChlSab1.1:17:40124640:40141616:1;gene:ENSCSAG00000008851.1;gene_biotype:protein_coding;transcript_biotype:protein_coding;gene_symbol:EHMT2;description:euchromatic;histone;lysine;methyltransferase;2;[Source:NCBI;gene;(formerly;Entrezgene);Acc:103221737]
ENSCSAT00000018708.1	933	775.518	129.549	46	cdna;chromosome:ChlSab1.1:8:121134166:121135098:-1;gene:ENSCSAG00000018618.1;gene_biotype:protein_coding;transcript_biotype:protein_coding;gene_symbol:LRATD2;description:LRAT;domain;containing;2;[Source:NCBI;gene;(formerly;Entrezgene);Acc:103237425]
ENSCSAT00000008980.1	3228	3070.51	129.457	182	cdna;chromosome:ChlSab1.1:23:54222838:54238006:-1;gene:ENSCSAG00000010892.1;gene_biotype:protein_coding;transcript_biotype:protein_coding;gene_symbol:SPARC;description:secreted;protein;acidic;and;cysteine;rich;[Source:NCBI;gene;(formerly;Entrezgene);Acc:103244814]
ENSCSAT00000007051.1	2334	2176.51	129.448	129	cdna;chromosome:ChlSab1.1:9:57452761:57459286:-1;gene:ENSCSAG00000008982.1;gene_biotype:protein_coding;transcript_biotype:protein_coding;gene_symbol:PLAU;description:plasminogen;activator,;urokinase;[Source:HGNC;Symbol;Acc:HGNC:9052]
ENSCSAT00000011097.1	478	320.679	129.405	19	cdna;chromosome:ChlSab1.1:21:52342397:52364103:1;gene:ENSCSAG00000013008.1;gene_biotype:protein_coding;transcript_biotype:protein_coding;description:SEM1;26S;proteasome;complex;subunit;[Source:NCBI;gene;(formerly;Entrezgene);Acc:103226516]
ENSCSAT00000010066.1	1812	1654.51	129.367	98	cdna;chromosome:ChlSab1.1:6:1329786:1347540:-1;gene:ENSCSAG00000011984.1;gene_biotype:protein_coding;transcript_biotype:protein_coding;gene_symbol:MEX3D;description:mex-3;RNA;binding;family;member;D;[Source:HGNC;Symbol;Acc:HGNC:16734]
ENSCSAT00000005864.1	3045	2887.51	129.342	171	cdna;chromosome:ChlSab1.1:2:88035347:88063442:1;gene:ENSCSAG00000007817.1;gene_biotype:protein_coding;transcript_biotype:protein_coding;gene_symbol:PFKL;description:phosphofructokinase,;liver;type;[Source:NCBI;gene;(formerly;Entrezgene);Acc:103219799]
ENSCSAT00000010523.1	8374	8216.51	129.186	486	cdna;chromosome:ChlSab1.1:10:74507772:74659366:-1;gene:ENSCSAG00000012430.1;gene_biotype:protein_coding;transcript_biotype:protein_coding;gene_symbol:COL5A2;description:collagen;type;V;alpha;2;chain;[Source:NCBI;gene;(formerly;Entrezgene);Acc:103217502]
ENSCSAT00000006756.1	1122	964.514	129.072	57	cdna;chromosome:ChlSab1.1:11:10500361:10522226:-1;gene:ENSCSAG00000008744.1;gene_biotype:protein_coding;transcript_biotype:protein_coding;gene_symbol:YBX3;description:Y-box;binding;protein;3;[Source:NCBI;gene;(formerly;Entrezgene);Acc:103218591]
ENSCSAT00000017365.1	5252	5094.51	128.964	300.819	cdna;chromosome:ChlSab1.1:20:90226001:90249413:-1;gene:ENSCSAG00000001168.1;gene_biotype:protein_coding;transcript_biotype:protein_coding;gene_symbol:YBX1;description:Y-box;binding;protein;1;[Source:HGNC;Symbol;Acc:HGNC:8014]
ENSCSAT00000007452.1	3144	2986.51	128.711	176	cdna;chromosome:ChlSab1.1:9:51608938:51656225:1;gene:ENSCSAG00000009384.1;gene_biotype:protein_coding;transcript_biotype:protein_coding;gene_symbol:ANXA11;description:annexin;A11;[Source:NCBI;gene;(formerly;Entrezgene);Acc:103215923]
ENSCSAT00000015639.1	1041	883.514	128.545	52	cdna;chromosome:ChlSab1.1:28:20680293:20699927:-1;gene:ENSCSAG00000017544.1;gene_biotype:protein_coding;transcript_biotype:protein_coding;gene_symbol:GET4;description:guided;entry;of;tail-anchored;proteins;factor;4;[Source:NCBI;gene;(formerly;Entrezgene);Acc:103246895]
ENSCSAT00000017168.1	1381	1223.51	128.526	72	cdna;chromosome:ChlSab1.1:20:65673450:65697828:1;gene:ENSCSAG00000001365.1;gene_biotype:protein_coding;transcript_biotype:protein_coding;gene_symbol:SERBP1;description:SERPINE1;mRNA;binding;protein;1;[Source:NCBI;gene;(formerly;Entrezgene);Acc:103224653]
ENSCSAT00000005999.1	1059	901.514	128.402	53	cdna;chromosome:ChlSab1.1:2:87489315:87531621:1;gene:ENSCSAG00000007949.1;gene_biotype:protein_coding;transcript_biotype:protein_coding;gene_symbol:PDXK;description:pyridoxal;kinase;[Source:NCBI;gene;(formerly;Entrezgene);Acc:103219611]
ENSCSAT00000003608.1	957	799.518	128.392	47	cdna;chromosome:ChlSab1.1:9:93544589:93550905:-1;gene:ENSCSAG00000005572.1;gene_biotype:protein_coding;transcript_biotype:protein_coding;description:NADH:ubiquinone;oxidoreductase;subunit;B8;[Source:NCBI;gene;(formerly;Entrezgene);Acc:103216390]
ENSCSAT00000004760.1	889	731.541	128.38	43	cdna;chromosome:ChlSab1.1:1:11140867:11150882:-1;gene:ENSCSAG00000006715.1;gene_biotype:protein_coding;transcript_biotype:protein_coding;gene_symbol:POLR2G;description:RNA;polymerase;II;subunit;G;[Source:NCBI;gene;(formerly;Entrezgene);Acc:103233885]
ENSCSAT00000007678.1	3631	3473.51	128.271	204	cdna;chromosome:ChlSab1.1:23:74929863:74934532:-1;gene:ENSCSAG00000009591.1;gene_biotype:protein_coding;transcript_biotype:protein_coding;gene_symbol:DUSP1;description:dual;specificity;phosphatase;1;[Source:NCBI;gene;(formerly;Entrezgene);Acc:103244980]
ENSCSAT00000012493.1	2184	2026.51	128.252	119	cdna;chromosome:ChlSab1.1:2:18408758:18419103:-1;gene:ENSCSAG00000014400.1;gene_biotype:protein_coding;transcript_biotype:protein_coding;gene_symbol:PIGT;description:phosphatidylinositol;glycan;anchor;biosynthesis;class;T;[Source:NCBI;gene;(formerly;Entrezgene);Acc:103245365]
ENSCSAT00000006785.1	1554	1396.51	128.244	82	cdna;chromosome:ChlSab1.1:23:79609826:79614084:1;gene:ENSCSAG00000008720.1;gene_biotype:protein_coding;transcript_biotype:protein_coding;gene_symbol:TMED9;description:transmembrane;p24;trafficking;protein;9;[Source:NCBI;gene;(formerly;Entrezgene);Acc:103245066]
ENSCSAT00000000498.1	3942	3784.51	127.903	221.628	cdna;chromosome:ChlSab1.1:6:42820350:42834111:1;gene:ENSCSAG00000002481.1;gene_biotype:protein_coding;transcript_biotype:protein_coding;gene_symbol:SCAF1;description:SR-related;CTD;associated;factor;1;[Source:NCBI;gene;(formerly;Entrezgene);Acc:103235049]
ENSCSAT00000000123.1	2228	2070.51	127.636	121	cdna;chromosome:ChlSab1.1:1:125411752:125454965:1;gene:ENSCSAG00000002106.1;gene_biotype:protein_coding;transcript_biotype:protein_coding;gene_symbol:GLB1L2;description:galactosidase;beta;1;like;2;[Source:HGNC;Symbol;Acc:HGNC:25129]
ENSCSAT00000006176.1	3070	2912.51	127.482	170	cdna;chromosome:ChlSab1.1:1:8189446:8207020:-1;gene:ENSCSAG00000008121.1;gene_biotype:protein_coding;transcript_biotype:protein_coding;gene_symbol:SF3B2;description:splicing;factor;3b;subunit;2;[Source:NCBI;gene;(formerly;Entrezgene);Acc:103224630]
ENSCSAT00000013017.1	3190	3032.51	127.479	177	cdna;chromosome:ChlSab1.1:2:16140427:16268750:1;gene:ENSCSAG00000014923.1;gene_biotype:protein_coding;transcript_biotype:protein_coding;gene_symbol:SULF2;description:sulfatase;2;[Source:NCBI;gene;(formerly;Entrezgene);Acc:103244707]
ENSCSAT00000003231.1	723	565.571	127.436	33	cdna;chromosome:ChlSab1.1:11:52177987:52182572:1;gene:ENSCSAG00000005199.1;gene_biotype:protein_coding;transcript_biotype:protein_coding;gene_symbol:NABP2;description:nucleic;acid;binding;protein;2;[Source:NCBI;gene;(formerly;Entrezgene);Acc:103238517]
ENSCSAT00000005164.1	706	548.574	127.404	32	cdna;chromosome:ChlSab1.1:12:103510454:103523084:-1;gene:ENSCSAG00000007123.1;gene_biotype:protein_coding;transcript_biotype:protein_coding;gene_symbol:NINJ1;description:ninjurin;1;[Source:NCBI;gene;(formerly;Entrezgene);Acc:103219765]
ENSCSAT00000003349.1	1272	1114.51	127.378	65	cdna;chromosome:ChlSab1.1:6:17061621:17074794:-1;gene:ENSCSAG00000005321.1;gene_biotype:protein_coding;transcript_biotype:protein_coding;gene_symbol:CRLF1;description:cytokine;receptor;like;factor;1;[Source:NCBI;gene;(formerly;Entrezgene);Acc:103234188]
ENSCSAT00000007038.1	861	703.541	127.28	41	cdna;chromosome:ChlSab1.1:8:137826293:137830546:-1;gene:ENSCSAG00000008980.1;gene_biotype:protein_coding;transcript_biotype:protein_coding;gene_symbol:PYCR3;description:pyrroline-5-carboxylate;reductase;3;[Source:HGNC;Symbol;Acc:HGNC:25846]
ENSCSAT00000003815.1	4296	4138.51	127.186	241	cdna;chromosome:ChlSab1.1:19:24160483:24206320:1;gene:ENSCSAG00000005784.1;gene_biotype:protein_coding;transcript_biotype:protein_coding;gene_symbol:XRCC6;description:X-ray;repair;cross;complementing;6;[Source:NCBI;gene;(formerly;Entrezgene);Acc:103223389]
ENSCSAT00000004338.1	6205	6047.51	126.764	351	cdna;chromosome:ChlSab1.1:9:86551128:86703466:-1;gene:ENSCSAG00000006419.1;gene_biotype:protein_coding;transcript_biotype:protein_coding;gene_symbol:MYOF;description:myoferlin;[Source:HGNC;Symbol;Acc:HGNC:3656]
ENSCSAT00000007780.1	2519	2361.51	126.706	137	cdna;chromosome:ChlSab1.1:24:82704068:82727698:-1;gene:ENSCSAG00000009699.1;gene_biotype:protein_coding;transcript_biotype:protein_coding;gene_symbol:AKT1;description:AKT;serine/threonine;kinase;1;[Source:NCBI;gene;(formerly;Entrezgene);Acc:103229784]
ENSCSAT00000005691.1	1278	1120.51	126.696	65	cdna;chromosome:ChlSab1.1:6:8920785:8936033:1;gene:ENSCSAG00000007637.1;gene_biotype:protein_coding;transcript_biotype:protein_coding;gene_symbol:PIN1;description:peptidylprolyl;cis/trans;isomerase,;NIMA-interacting;1;[Source:NCBI;gene;(formerly;Entrezgene);Acc:103233878]
ENSCSAT00000017680.1	692	534.574	126.655	31	cdna;chromosome:ChlSab1.1:20:115933259:115937803:-1;gene:ENSCSAG00000000853.1;gene_biotype:protein_coding;transcript_biotype:protein_coding;gene_symbol:SZRD1;description:SUZ;RNA;binding;domain;containing;1;[Source:HGNC;Symbol;Acc:HGNC:30232]
ENSCSAT00000009734.1	399	241.791	126.46	14	cdna;chromosome:ChlSab1.1:5:1308892:1309369:-1;gene:ENSCSAG00000011651.1;gene_biotype:protein_coding;transcript_biotype:protein_coding;gene_symbol:C16orf91;description:chromosome;16;open;reading;frame;91;[Source:HGNC;Symbol;Acc:HGNC:27558]
ENSCSAT00000003805.1	3359	3201.51	126.207	185	cdna;chromosome:ChlSab1.1:10:127387280:127421201:1;gene:ENSCSAG00000005773.1;gene_biotype:protein_coding;transcript_biotype:protein_coding;gene_symbol:SEPTIN2;description:septin;2;[Source:NCBI;gene;(formerly;Entrezgene);Acc:103218237]
ENSCSAT00000006559.1	4520	4362.51	126.163	252	cdna;chromosome:ChlSab1.1:8:138602835:138617071:-1;gene:ENSCSAG00000008502.1;gene_biotype:protein_coding;transcript_biotype:protein_coding;gene_symbol:CPSF1;description:cleavage;and;polyadenylation;specific;factor;1;[Source:NCBI;gene;(formerly;Entrezgene);Acc:103237623]
ENSCSAT00000018696.1	183	51.936	126.159	3	cdna;chromosome:ChlSab1.1:8:101746176:101746358:-1;gene:ENSCSAG00000018606.1;gene_biotype:protein_coding;transcript_biotype:protein_coding
ENSCSAT00000017062.1	3805	3647.51	125.91	210.277	cdna;chromosome:ChlSab1.1:20:40413897:40427060:-1;gene:ENSCSAG00000001471.1;gene_biotype:protein_coding;transcript_biotype:protein_coding
ENSCSAT00000000391.1	2586	2428.51	125.908	140	cdna;chromosome:ChlSab1.1:20:5816187:5917968:-1;gene:ENSCSAG00000002376.1;gene_biotype:protein_coding;transcript_biotype:protein_coding;gene_symbol:KIRREL1;description:kirre;like;nephrin;family;adhesion;molecule;1;[Source:NCBI;gene;(formerly;Entrezgene);Acc:103223800]
ENSCSAT00000004695.1	383	225.859	125.711	13	cdna;chromosome:ChlSab1.1:1:11235023:11235492:-1;gene:ENSCSAG00000006653.1;gene_biotype:protein_coding;transcript_biotype:protein_coding;gene_symbol:UQCC3;description:chromosome;1;open;reading;frame,;human;C11orf83;[Source:NCBI;gene;(formerly;Entrezgene);Acc:103233987]
ENSCSAT00000004174.1	818	660.545	125.646	38	cdna;chromosome:ChlSab1.1:5:26689065:26697604:-1;gene:ENSCSAG00000006136.1;gene_biotype:protein_coding;transcript_biotype:protein_coding;gene_symbol:TMEM219;description:transmembrane;protein;219;[Source:HGNC;Symbol;Acc:HGNC:25201]
ENSCSAT00000014866.1	3097	2939.51	125.568	169	cdna;chromosome:ChlSab1.1:14:15659361:15676645:1;gene:ENSCSAG00000016771.1;gene_biotype:protein_coding;transcript_biotype:protein_coding;gene_symbol:SLC20A1;description:solute;carrier;family;20;member;1;[Source:NCBI;gene;(formerly;Entrezgene);Acc:103241274]
ENSCSAT00000001489.1	1359	1201.51	125.426	69	cdna;chromosome:ChlSab1.1:6:36501314:36507846:-1;gene:ENSCSAG00000003459.1;gene_biotype:protein_coding;transcript_biotype:protein_coding;gene_symbol:PAFAH1B3;description:platelet;activating;factor;acetylhydrolase;1b;catalytic;subunit;3;[Source:NCBI;gene;(formerly;Entrezgene);Acc:103234766]
ENSCSAT00000018832.1	276	121.951	125.366	7	cdna;chromosome:ChlSab1.1:2:10300224:10300499:-1;gene:ENSCSAG00000018742.1;gene_biotype:protein_coding;transcript_biotype:protein_coding;description:small;nuclear;ribonucleoprotein;E;[Source:NCBI;gene;(formerly;Entrezgene);Acc:103244060]
ENSCSAT00000008428.1	3102	2944.51	125.354	169	cdna;chromosome:ChlSab1.1:24:78295741:78339732:-1;gene:ENSCSAG00000010343.1;gene_biotype:protein_coding;transcript_biotype:protein_coding;gene_symbol:WARS1;description:tryptophanyl-tRNA;synthetase;1;[Source:NCBI;gene;(formerly;Entrezgene);Acc:103229694]
ENSCSAT00000000351.1	750	592.561	125.318	34	cdna;chromosome:ChlSab1.1:11:112029705:112051814:-1;gene:ENSCSAG00000002334.1;gene_biotype:protein_coding;transcript_biotype:protein_coding;description:SREBF;pathway;regulator;in;golgi;1;[Source:NCBI;gene;(formerly;Entrezgene);Acc:103239205]
ENSCSAT00000014227.1	1362	1204.51	125.113	69	cdna;chromosome:ChlSab1.1:21:2718975:2728239:-1;gene:ENSCSAG00000016131.1;gene_biotype:protein_coding;transcript_biotype:protein_coding;gene_symbol:CCT6A;description:chaperonin;containing;TCP1;subunit;6A;[Source:HGNC;Symbol;Acc:HGNC:1620]
ENSCSAT00000015674.1	1537	1379.51	125.074	79	cdna;chromosome:ChlSab1.1:28:20028092:20030922:1;gene:ENSCSAG00000017580.1;gene_biotype:protein_coding;transcript_biotype:protein_coding;gene_symbol:PSMG3;description:proteasome;assembly;chaperone;3;[Source:NCBI;gene;(formerly;Entrezgene);Acc:103246877]
ENSCSAT00000005110.1	5314	5156.51	125.029	295.188	cdna;chromosome:ChlSab1.1:12:103829680:103945419:1;gene:ENSCSAG00000007068.1;gene_biotype:protein_coding;transcript_biotype:protein_coding;gene_symbol:FAM120A;description:family;with;sequence;similarity;120A;[Source:NCBI;gene;(formerly;Entrezgene);Acc:103219772]
ENSCSAT00000001227.1	2222	2064.51	124.833	118	cdna;chromosome:ChlSab1.1:1:94167219:94176767:-1;gene:ENSCSAG00000003198.1;gene_biotype:protein_coding;transcript_biotype:protein_coding;gene_symbol:MMP1;description:matrix;metallopeptidase;1;[Source:NCBI;gene;(formerly;Entrezgene);Acc:103248335]
ENSCSAT00000006863.1	735	577.567	124.79	33	cdna;chromosome:ChlSab1.1:8:138290705:138292570:1;gene:ENSCSAG00000008802.1;gene_biotype:protein_coding;transcript_biotype:protein_coding;gene_symbol:EXOSC4;description:exosome;component;4;[Source:NCBI;gene;(formerly;Entrezgene);Acc:103237603]
ENSCSAT00000017472.1	6708	6550.51	124.699	374	cdna;chromosome:ChlSab1.1:20:100095686:100131949:-1;gene:ENSCSAG00000001061.1;gene_biotype:protein_coding;transcript_biotype:protein_coding;gene_symbol:KIAA1522;description:KIAA1522;ortholog;[Source:NCBI;gene;(formerly;Entrezgene);Acc:103225178]
ENSCSAT00000013679.1	2772	2614.51	124.469	149	cdna;chromosome:ChlSab1.1:27:47544682:47570636:1;gene:ENSCSAG00000015583.1;gene_biotype:protein_coding;transcript_biotype:protein_coding;gene_symbol:CTBP1;description:C-terminal;binding;protein;1;[Source:HGNC;Symbol;Acc:HGNC:2494]
ENSCSAT00000013490.1	1058	900.514	123.693	51	cdna;chromosome:ChlSab1.1:25:17080005:17091346:-1;gene:ENSCSAG00000015395.1;gene_biotype:protein_coding;transcript_biotype:protein_coding;gene_symbol:NENF;description:neudesin;neurotrophic;factor;[Source:NCBI;gene;(formerly;Entrezgene);Acc:103230125]
ENSCSAT00000013710.1	2845	2687.51	123.526	152	cdna;chromosome:ChlSab1.1:4:67158101:67248256:1;gene:ENSCSAG00000015616.1;gene_biotype:protein_coding;transcript_biotype:protein_coding;gene_symbol:TNPO1;description:transportin;1;[Source:NCBI;gene;(formerly;Entrezgene);Acc:103222967]
ENSCSAT00000006577.1	1715	1557.51	123.401	88	cdna;chromosome:ChlSab1.1:8:138571081:138573079:1;gene:ENSCSAG00000008519.1;gene_biotype:protein_coding;transcript_biotype:protein_coding;gene_symbol:SLC52A2;description:solute;carrier;family;52;member;2;[Source:NCBI;gene;(formerly;Entrezgene);Acc:103237620]
ENSCSAT00000018971.1	795	637.545	123.366	36.011	cdna;chromosome:ChlSab1.1:15:5205522:5206316:-1;gene:ENSCSAG00000018881.1;gene_biotype:protein_coding;transcript_biotype:protein_coding;description:transcription;initiation;factor;TFIID;subunit;9;[Source:NCBI;gene;(formerly;Entrezgene);Acc:103221142]
ENSCSAT00000008531.1	1875	1717.51	123.35	97	cdna;chromosome:ChlSab1.1:2:56184679:56191012:-1;gene:ENSCSAG00000010444.1;gene_biotype:protein_coding;transcript_biotype:protein_coding;gene_symbol:EIF6;description:eukaryotic;translation;initiation;factor;6;[Source:NCBI;gene;(formerly;Entrezgene);Acc:103216043]
ENSCSAT00000002264.1	6930	6772.51	123.191	382	cdna;chromosome:ChlSab1.1:1:62925050:63050111:1;gene:ENSCSAG00000004237.1;gene_biotype:protein_coding;transcript_biotype:protein_coding;gene_symbol:NUP98;description:nucleoporin;98;and;96;precursor;[Source:NCBI;gene;(formerly;Entrezgene);Acc:103247974]
ENSCSAT00000003797.1	1381	1223.51	123.171	69	cdna;chromosome:ChlSab1.1:10:127571665:127580071:-1;gene:ENSCSAG00000005762.1;gene_biotype:protein_coding;transcript_biotype:protein_coding;gene_symbol:STK25;description:serine/threonine;kinase;25;[Source:NCBI;gene;(formerly;Entrezgene);Acc:103218241]
ENSCSAT00000006765.1	1420	1262.51	122.826	71	cdna;chromosome:ChlSab1.1:9:57863546:57900324:1;gene:ENSCSAG00000008750.1;gene_biotype:protein_coding;transcript_biotype:protein_coding;gene_symbol:ANXA7;description:annexin;A7;[Source:NCBI;gene;(formerly;Entrezgene);Acc:103216003]
ENSCSAT00000004964.1	3316	3158.51	122.393	177	cdna;chromosome:ChlSab1.1:X:128116944:128124918:1;gene:ENSCSAG00000006918.1;gene_biotype:protein_coding;transcript_biotype:protein_coding;gene_symbol:SLC6A8;description:solute;carrier;family;6;member;8;[Source:NCBI;gene;(formerly;Entrezgene);Acc:103232796]
ENSCSAT00000019112.1	1710	1552.51	122.391	87	cdna;chromosome:ChlSab1.1:16:61837304:61839013:-1;gene:ENSCSAG00000019022.1;gene_biotype:protein_coding;transcript_biotype:protein_coding;gene_symbol:FZD2;description:frizzled;class;receptor;2;[Source:HGNC;Symbol;Acc:HGNC:4040]
ENSCSAT00000010481.1	4280	4122.51	122.382	231	cdna;chromosome:ChlSab1.1:21:61322748:61529274:1;gene:ENSCSAG00000012391.1;gene_biotype:protein_coding;transcript_biotype:protein_coding;gene_symbol:ABCB1;description:ATP;binding;cassette;subfamily;B;member;1;[Source:NCBI;gene;(formerly;Entrezgene);Acc:103226605]
ENSCSAT00000000687.1	5013	4855.51	122.349	272	cdna;chromosome:ChlSab1.1:11:105522157:105590958:1;gene:ENSCSAG00000002670.1;gene_biotype:protein_coding;transcript_biotype:protein_coding;gene_symbol:ATP2A2;description:ATPase;sarcoplasmic/endoplasmic;reticulum;Ca2+;transporting;2;[Source:NCBI;gene;(formerly;Entrezgene);Acc:103239106]
ENSCSAT00000007694.1	1354	1196.51	122.299	67	cdna;chromosome:ChlSab1.1:26:38331442:38338809:-1;gene:ENSCSAG00000009613.1;gene_biotype:protein_coding;transcript_biotype:protein_coding;gene_symbol:B2M;description:beta-2-microglobulin;[Source:NCBI;gene;(formerly;Entrezgene);Acc:103245714]
ENSCSAT00000014132.1	461	303.697	122.258	17	cdna;chromosome:ChlSab1.1:21:4114916:4122123:1;gene:ENSCSAG00000016040.1;gene_biotype:protein_coding;transcript_biotype:protein_coding;gene_symbol:SEC61G;description:SEC61;translocon;subunit;gamma;[Source:NCBI;gene;(formerly;Entrezgene);Acc:103226057]
ENSCSAT00000005291.1	1408	1250.51	122.183	69.957	cdna;chromosome:ChlSab1.1:17:69026130:69029801:1;gene:ENSCSAG00000007247.1;gene_biotype:protein_coding;transcript_biotype:protein_coding;gene_symbol:TUBB2A;description:tubulin;beta-2B;chain-like;[Source:NCBI;gene;(formerly;Entrezgene);Acc:103222274]
ENSCSAT00000017756.1	2160	2002.51	122.154	112	cdna;chromosome:ChlSab1.1:20:121359381:121377032:-1;gene:ENSCSAG00000000778.1;gene_biotype:protein_coding;transcript_biotype:protein_coding;gene_symbol:PGD;description:phosphogluconate;dehydrogenase;[Source:HGNC;Symbol;Acc:HGNC:8891]
ENSCSAT00000002388.1	2375	2217.51	122.13	124	cdna;chromosome:ChlSab1.1:5:53805020:53827648:-1;gene:ENSCSAG00000004357.1;gene_biotype:protein_coding;transcript_biotype:protein_coding;gene_symbol:MTSS2;description:MTSS;I-BAR;domain;containing;2;[Source:NCBI;gene;(formerly;Entrezgene);Acc:103233163]
ENSCSAT00000006402.1	3630	3472.51	122.018	194	cdna;chromosome:ChlSab1.1:5:11021717:11059149:-1;gene:ENSCSAG00000008354.1;gene_biotype:protein_coding;transcript_biotype:protein_coding;gene_symbol:LITAF;description:lipopolysaccharide;induced;TNF;factor;[Source:NCBI;gene;(formerly;Entrezgene);Acc:103228362]
ENSCSAT00000010302.1	9485	9327.51	121.76	520	cdna;chromosome:ChlSab1.1:22:19304781:19468036:1;gene:ENSCSAG00000012217.1;gene_biotype:protein_coding;transcript_biotype:protein_coding;gene_symbol:FLNB;description:filamin;B;[Source:NCBI;gene;(formerly;Entrezgene);Acc:103227804]
ENSCSAT00000002877.1	6150	5992.51	121.732	334	cdna;chromosome:ChlSab1.1:5:43687613:43730268:-1;gene:ENSCSAG00000004843.1;gene_biotype:protein_coding;transcript_biotype:protein_coding;gene_symbol:KIFC3;description:kinesin;family;member;C3;[Source:HGNC;Symbol;Acc:HGNC:6326]
ENSCSAT00000008262.1	3714	3556.51	121.593	198	cdna;chromosome:ChlSab1.1:11:6964784:6972801:1;gene:ENSCSAG00000010176.1;gene_biotype:protein_coding;transcript_biotype:protein_coding;gene_symbol:ATN1;description:atrophin;1;[Source:NCBI;gene;(formerly;Entrezgene);Acc:103218489]
ENSCSAT00000008614.1	3538	3380.51	121.546	188.129	cdna;chromosome:ChlSab1.1:1:639345:647157:1;gene:ENSCSAG00000010533.1;gene_biotype:protein_coding;transcript_biotype:protein_coding;gene_symbol:CD151;description:CD151;molecule;(Raph;blood;group);[Source:NCBI;gene;(formerly;Entrezgene);Acc:103234052]
ENSCSAT00000009644.1	571	413.612	121.451	23	cdna;chromosome:ChlSab1.1:15:40146977:40149022:1;gene:ENSCSAG00000011557.1;gene_biotype:protein_coding;transcript_biotype:protein_coding;gene_symbol:SERP1;description:stress;associated;endoplasmic;reticulum;protein;1;[Source:NCBI;gene;(formerly;Entrezgene);Acc:103241481]
ENSCSAT00000008056.1	5826	5668.51	121.369	315	cdna;chromosome:ChlSab1.1:6:4882223:4964919:-1;gene:ENSCSAG00000010283.1;gene_biotype:protein_coding;transcript_biotype:protein_coding;gene_symbol:PTPRS;description:protein;tyrosine;phosphatase;receptor;type;S;[Source:HGNC;Symbol;Acc:HGNC:9681]
ENSCSAT00000019078.1	681	523.574	120.973	29	cdna;chromosome:ChlSab1.1:4:16936178:16936858:1;gene:ENSCSAG00000018988.1;gene_biotype:protein_coding;transcript_biotype:protein_coding;gene_symbol:BASP1;description:brain;abundant;membrane;attached;signal;protein;1;[Source:NCBI;gene;(formerly;Entrezgene);Acc:103215039]
ENSCSAT00000018588.1	1044	886.514	120.719	49	cdna;chromosome:ChlSab1.1:6:16755247:16756290:-1;gene:ENSCSAG00000018498.1;gene_biotype:protein_coding;transcript_biotype:protein_coding;gene_symbol:JUND;description:JunD;proto-oncogene,;AP-1;transcription;factor;subunit;[Source:NCBI;gene;(formerly;Entrezgene);Acc:103234174]
ENSCSAT00000016120.1	3958	3800.51	120.682	210	cdna;chromosome:ChlSab1.1:28:11962286:11975228:1;gene:ENSCSAG00000018025.1;gene_biotype:protein_coding;transcript_biotype:protein_coding;gene_symbol:PLOD3;description:procollagen-lysine,2-oxoglutarate;5-dioxygenase;3;[Source:NCBI;gene;(formerly;Entrezgene);Acc:103246688]
ENSCSAT00000001163.1	610	452.594	120.642	25	cdna;chromosome:ChlSab1.1:5:72763050:72772770:1;gene:ENSCSAG00000003134.1;gene_biotype:protein_coding;transcript_biotype:protein_coding;description:microtubule;associated;protein;1;light;chain;3;beta;[Source:NCBI;gene;(formerly;Entrezgene);Acc:103233426]
ENSCSAT00000013918.1	1860	1702.51	120.588	94	cdna;chromosome:ChlSab1.1:8:28903240:28930376:-1;gene:ENSCSAG00000015823.1;gene_biotype:protein_coding;transcript_biotype:protein_coding;gene_symbol:PPP2CB;description:protein;phosphatase;2;catalytic;subunit;beta;[Source:NCBI;gene;(formerly;Entrezgene);Acc:103215586]
ENSCSAT00000010285.1	4116	3958.51	120.474	218.353	cdna;chromosome:ChlSab1.1:10:76492533:76533393:-1;gene:ENSCSAG00000012191.1;gene_biotype:protein_coding;transcript_biotype:protein_coding;gene_symbol:STAT1;description:signal;transducer;and;activator;of;transcription;1;[Source:NCBI;gene;(formerly;Entrezgene);Acc:103217529]
ENSCSAT00000012640.1	1101	943.514	120.371	52	cdna;chromosome:ChlSab1.1:12:9019024:9056703:-1;gene:ENSCSAG00000014550.1;gene_biotype:protein_coding;transcript_biotype:protein_coding;gene_symbol:PTPA;description:protein;phosphatase;2;phosphatase;activator;[Source:NCBI;gene;(formerly;Entrezgene);Acc:103239776]
ENSCSAT00000018034.1	648	490.585	120.203	27	cdna;chromosome:ChlSab1.1:23:38401969:38402616:-1;gene:ENSCSAG00000000501.1;gene_biotype:protein_coding;transcript_biotype:protein_coding
ENSCSAT00000000283.1	1885	1727.51	120.107	95	cdna;chromosome:ChlSab1.1:11:115792622:115796488:1;gene:ENSCSAG00000002263.1;gene_biotype:protein_coding;transcript_biotype:protein_coding;description:cytochrome;c;oxidase;subunit;6A1;[Source:NCBI;gene;(formerly;Entrezgene);Acc:103239250]
ENSCSAT00000008558.1	2634	2476.51	119.94	136	cdna;chromosome:ChlSab1.1:6:4394750:4440227:-1;gene:ENSCSAG00000010475.1;gene_biotype:protein_coding;transcript_biotype:protein_coding;gene_symbol:DPP9;description:dipeptidyl;peptidase;9;[Source:NCBI;gene;(formerly;Entrezgene);Acc:103233727]
ENSCSAT00000005958.1	2052	1894.51	119.895	104	cdna;chromosome:ChlSab1.1:19:19199499:19218641:-1;gene:ENSCSAG00000007910.1;gene_biotype:protein_coding;transcript_biotype:protein_coding;gene_symbol:FOXRED2;description:FAD;dependent;oxidoreductase;domain;containing;2;[Source:NCBI;gene;(formerly;Entrezgene);Acc:103223248]
ENSCSAT00000009165.1	650	492.585	119.715	27	cdna;chromosome:ChlSab1.1:16:7318911:7320343:-1;gene:ENSCSAG00000011079.1;gene_biotype:protein_coding;transcript_biotype:protein_coding;gene_symbol:TRAPPC1;description:trafficking;protein;particle;complex;1;[Source:NCBI;gene;(formerly;Entrezgene);Acc:103242332]
ENSCSAT00000018234.1	453	295.701	119.675	16.203	cdna;chromosome:ChlSab1.1:X:106872851:106873303:-1;gene:ENSCSAG00000000301.1;gene_biotype:protein_coding;transcript_biotype:protein_coding
ENSCSAT00000012862.1	3407	3249.51	119.638	178	cdna;chromosome:ChlSab1.1:21:27456259:27470728:-1;gene:ENSCSAG00000014769.1;gene_biotype:protein_coding;transcript_biotype:protein_coding;gene_symbol:AQP1;description:aquaporin;1;(Colton;blood;group);[Source:NCBI;gene;(formerly;Entrezgene);Acc:103226268]
ENSCSAT00000009002.1	6466	6308.51	119.442	345	cdna;chromosome:ChlSab1.1:21:85397645:85488093:1;gene:ENSCSAG00000010912.1;gene_biotype:protein_coding;transcript_biotype:protein_coding;gene_symbol:MET;description:MET;proto-oncogene,;receptor;tyrosine;kinase;[Source:HGNC;Symbol;Acc:HGNC:7029]
ENSCSAT00000007958.1	1706	1548.51	119.422	84.671	cdna;chromosome:ChlSab1.1:14:80173716:80181756:-1;gene:ENSCSAG00000009989.1;gene_biotype:protein_coding;transcript_biotype:protein_coding;gene_symbol:NRBP1;description:nuclear;receptor;binding;protein;1;[Source:NCBI;gene;(formerly;Entrezgene);Acc:103220589]
ENSCSAT00000017980.1	597	439.606	119.238	24	cdna;chromosome:ChlSab1.1:16:30269779:30270375:-1;gene:ENSCSAG00000000555.1;gene_biotype:protein_coding;transcript_biotype:protein_coding;gene_symbol:DUSP14;description:dual;specificity;phosphatase;14;[Source:NCBI;gene;(formerly;Entrezgene);Acc:103242783]
ENSCSAT00000000328.1	5366	5208.51	119.089	284	cdna;chromosome:ChlSab1.1:16:72439482:72449139:-1;gene:ENSCSAG00000002310.1;gene_biotype:protein_coding;transcript_biotype:protein_coding;gene_symbol:NPTX1;description:neuronal;pentraxin;1;[Source:NCBI;gene;(formerly;Entrezgene);Acc:103243698]
ENSCSAT00000002102.1	1680	1522.51	119.065	83	cdna;chromosome:ChlSab1.1:6:33016255:33026425:1;gene:ENSCSAG00000004073.1;gene_biotype:protein_coding;transcript_biotype:protein_coding;gene_symbol:PSMD8;description:proteasome;26S;subunit,;non-ATPase;8;[Source:HGNC;Symbol;Acc:HGNC:9566]
ENSCSAT00000018240.1	598	440.605	118.968	24	cdna;chromosome:ChlSab1.1:X:110238255:110238852:1;gene:ENSCSAG00000000295.1;gene_biotype:protein_coding;transcript_biotype:protein_coding;gene_symbol:RTL8C;description:retrotransposon;Gag;like;8C;[Source:NCBI;gene;(formerly;Entrezgene);Acc:103232606]
ENSCSAT00000004727.1	3041	2883.51	118.917	157	cdna;chromosome:ChlSab1.1:19:20998009:21022576:-1;gene:ENSCSAG00000006688.1;gene_biotype:protein_coding;transcript_biotype:protein_coding;description:casein;kinase;1;epsilon;[Source:NCBI;gene;(formerly;Entrezgene);Acc:103223312]
ENSCSAT00000004368.1	2861	2703.51	118.756	147	cdna;chromosome:ChlSab1.1:19:22091667:22095230:1;gene:ENSCSAG00000006330.1;gene_biotype:protein_coding;transcript_biotype:protein_coding;gene_symbol:ATF4;description:activating;transcription;factor;4;[Source:NCBI;gene;(formerly;Entrezgene);Acc:103223345]
ENSCSAT00000004872.1	618	460.594	118.546	25	cdna;chromosome:ChlSab1.1:14:107450302:107465421:-1;gene:ENSCSAG00000006832.1;gene_biotype:protein_coding;transcript_biotype:protein_coding
ENSCSAT00000015372.1	535	377.638	118.513	20.492	cdna;chromosome:ChlSab1.1:29:3110984:3113784:1;gene:ENSCSAG00000017280.1;gene_biotype:protein_coding;transcript_biotype:protein_coding
ENSCSAT00000006236.1	2185	2027.51	118.494	110	cdna;chromosome:ChlSab1.1:12:83949399:84009003:-1;gene:ENSCSAG00000008188.1;gene_biotype:protein_coding;transcript_biotype:protein_coding;gene_symbol:ALDH1A1;description:aldehyde;dehydrogenase;1;family;member;A1;[Source:NCBI;gene;(formerly;Entrezgene);Acc:103219585]
ENSCSAT00000004417.1	1725	1567.51	118.433	85	cdna;chromosome:ChlSab1.1:16:25918165:25941560:1;gene:ENSCSAG00000006379.1;gene_biotype:protein_coding;transcript_biotype:protein_coding;gene_symbol:ZNF207;description:zinc;finger;protein;207;[Source:NCBI;gene;(formerly;Entrezgene);Acc:103242694]
ENSCSAT00000006459.1	990	832.515	118.056	45	cdna;chromosome:ChlSab1.1:1:7420653:7423265:-1;gene:ENSCSAG00000008408.1;gene_biotype:protein_coding;transcript_biotype:protein_coding;gene_symbol:RCE1;description:CAAX;prenyl;protease;2;[Source:NCBI;gene;(formerly;Entrezgene);Acc:103220516]
ENSCSAT00000000569.1	546	388.632	118.018	21	cdna;chromosome:ChlSab1.1:20:3733549:3741585:-1;gene:ENSCSAG00000002551.1;gene_biotype:protein_coding;transcript_biotype:protein_coding;gene_symbol:PEA15;description:proliferation;and;apoptosis;adaptor;protein;15;[Source:NCBI;gene;(formerly;Entrezgene);Acc:103223729]
ENSCSAT00000013875.1	7877	7719.51	117.698	416	cdna;chromosome:ChlSab1.1:21:11292788:11554933:1;gene:ENSCSAG00000015783.1;gene_biotype:protein_coding;transcript_biotype:protein_coding;gene_symbol:TNS3;description:tensin;3;[Source:NCBI;gene;(formerly;Entrezgene);Acc:103226102]
ENSCSAT00000004631.1	956	798.518	117.612	43	cdna;chromosome:ChlSab1.1:6:11419938:11424062:-1;gene:ENSCSAG00000006588.1;gene_biotype:protein_coding;transcript_biotype:protein_coding;gene_symbol:TRIR;description:telomerase;RNA;component;interacting;RNase;[Source:NCBI;gene;(formerly;Entrezgene);Acc:103233985]
ENSCSAT00000005822.1	715	557.573	117.513	30	cdna;chromosome:ChlSab1.1:17:47535883:47548354:1;gene:ENSCSAG00000007778.1;gene_biotype:protein_coding;transcript_biotype:protein_coding;gene_symbol:C6orf62;description:chromosome;17;open;reading;frame,;human;C6orf62;[Source:NCBI;gene;(formerly;Entrezgene);Acc:103222047]
ENSCSAT00000012786.1	1221	1063.51	117.057	57	cdna;chromosome:ChlSab1.1:14:43406499:43425095:-1;gene:ENSCSAG00000014691.1;gene_biotype:protein_coding;transcript_biotype:protein_coding;gene_symbol:MDH1;description:malate;dehydrogenase;1;[Source:NCBI;gene;(formerly;Entrezgene);Acc:103220175]
ENSCSAT00000015196.1	736	578.567	117.024	31	cdna;chromosome:ChlSab1.1:29:8777436:8781030:-1;gene:ENSCSAG00000017104.1;gene_biotype:protein_coding;transcript_biotype:protein_coding;gene_symbol:CIB1;description:calcium;and;integrin;binding;1;[Source:NCBI;gene;(formerly;Entrezgene);Acc:103231169]
ENSCSAT00000019394.1	93	18.673	116.965	1	cdna;chromosome:ChlSab1.1:17:36294267:36294359:-1;gene:ENSCSAG00000019304.1;gene_biotype:protein_coding;transcript_biotype:protein_coding
ENSCSAT00000004610.1	2007	1849.51	116.908	99	cdna;chromosome:ChlSab1.1:1:11303494:11311379:1;gene:ENSCSAG00000006593.1;gene_biotype:protein_coding;transcript_biotype:protein_coding;gene_symbol:MTA2;description:metastasis;associated;1;family;member;2;[Source:HGNC;Symbol;Acc:HGNC:7411]
ENSCSAT00000009504.1	1634	1476.51	116.857	79	cdna;chromosome:ChlSab1.1:12:32204893:32250570:-1;gene:ENSCSAG00000011420.1;gene_biotype:protein_coding;transcript_biotype:protein_coding;gene_symbol:RAD23B;description:RAD23;homolog;B,;nucleotide;excision;repair;protein;[Source:NCBI;gene;(formerly;Entrezgene);Acc:103219057]
ENSCSAT00000003864.1	4634	4476.51	116.732	239.255	cdna;chromosome:ChlSab1.1:19:23788241:23829631:-1;gene:ENSCSAG00000005830.1;gene_biotype:protein_coding;transcript_biotype:protein_coding;gene_symbol:RANGAP1;description:Ran;GTPase;activating;protein;1;[Source:NCBI;gene;(formerly;Entrezgene);Acc:103223376]
ENSCSAT00000017498.1	2201	2043.51	116.497	109	cdna;chromosome:ChlSab1.1:20:101401222:101423599:-1;gene:ENSCSAG00000001035.1;gene_biotype:protein_coding;transcript_biotype:protein_coding;gene_symbol:SERINC2;description:serine;incorporator;2;[Source:NCBI;gene;(formerly;Entrezgene);Acc:103225223]
ENSCSAT00000010537.1	739	581.567	116.42	31	cdna;chromosome:ChlSab1.1:21:60730051:60749678:1;gene:ENSCSAG00000012443.1;gene_biotype:protein_coding;transcript_biotype:protein_coding;gene_symbol:SRI;description:sorcin;[Source:NCBI;gene;(formerly;Entrezgene);Acc:103226599]
ENSCSAT00000015562.1	702	544.574	116.308	29	cdna;chromosome:ChlSab1.1:3:88770271:88803177:-1;gene:ENSCSAG00000017468.1;gene_biotype:protein_coding;transcript_biotype:protein_coding;gene_symbol:RAB20;description:RAB20,;member;RAS;oncogene;family;[Source:NCBI;gene;(formerly;Entrezgene);Acc:103214790]
ENSCSAT00000019337.1	1566	1408.51	116.297	75	cdna;chromosome:ChlSab1.1:11:43282518:43284083:-1;gene:ENSCSAG00000019247.1;gene_biotype:protein_coding;transcript_biotype:protein_coding;gene_symbol:AMIGO2;description:adhesion;molecule;with;Ig;like;domain;2;[Source:NCBI;gene;(formerly;Entrezgene);Acc:103238204]
ENSCSAT00000005286.1	5086	4928.51	116.105	262	cdna;chromosome:ChlSab1.1:12:102744569:102819603:-1;gene:ENSCSAG00000007241.1;gene_biotype:protein_coding;transcript_biotype:protein_coding;gene_symbol:IARS1;description:isoleucyl-tRNA;synthetase;1;[Source:NCBI;gene;(formerly;Entrezgene);Acc:103219751]
ENSCSAT00000014762.1	1025	867.514	116.049	46.095	cdna;chromosome:ChlSab1.1:29:20979274:20981135:1;gene:ENSCSAG00000016670.1;gene_biotype:protein_coding;transcript_biotype:protein_coding;description:DNA-(apurinic;or;apyrimidinic;site);lyase;[Source:NCBI;gene;(formerly;Entrezgene);Acc:103231340]
ENSCSAT00000012424.1	2569	2411.51	115.928	128	cdna;chromosome:ChlSab1.1:22:11623408:11647191:1;gene:ENSCSAG00000014329.1;gene_biotype:protein_coding;transcript_biotype:protein_coding;gene_symbol:GNAI2;description:G;protein;subunit;alpha;i2;[Source:NCBI;gene;(formerly;Entrezgene);Acc:103227664]
ENSCSAT00000013680.1	1760	1602.51	115.847	85	cdna;chromosome:ChlSab1.1:2:5146575:5159883:-1;gene:ENSCSAG00000015585.1;gene_biotype:protein_coding;transcript_biotype:protein_coding;gene_symbol:NELFCD;description:negative;elongation;factor;complex;member;C/D;[Source:HGNC;Symbol;Acc:HGNC:15934]
ENSCSAT00000002740.1	1572	1414.51	115.803	75	cdna;chromosome:ChlSab1.1:16:46479406:46496114:1;gene:ENSCSAG00000004710.1;gene_biotype:protein_coding;transcript_biotype:protein_coding;gene_symbol:SUMO2;description:small;ubiquitin;like;modifier;2;[Source:NCBI;gene;(formerly;Entrezgene);Acc:103243054]
ENSCSAT00000008631.1	4801	4643.51	115.649	245.878	cdna;chromosome:ChlSab1.1:11:6535282:6566546:1;gene:ENSCSAG00000010550.1;gene_biotype:protein_coding;transcript_biotype:protein_coding;gene_symbol:NCAPD2;description:non-SMC;condensin;I;complex;subunit;D2;[Source:NCBI;gene;(formerly;Entrezgene);Acc:103218454]
ENSCSAT00000004490.1	5824	5666.51	115.63	300	cdna;chromosome:ChlSab1.1:1:12066175:12085236:-1;gene:ENSCSAG00000006452.1;gene_biotype:protein_coding;transcript_biotype:protein_coding;gene_symbol:MYRF;description:myelin;regulatory;factor;[Source:HGNC;Symbol;Acc:HGNC:1181]
ENSCSAT00000016670.1	630	472.59	115.537	25	cdna;chromosome:ChlSab1.1:20:10177694:10186421:1;gene:ENSCSAG00000001859.1;gene_biotype:protein_coding;transcript_biotype:protein_coding;gene_symbol:S100A13;description:S100;calcium;binding;protein;A13;[Source:NCBI;gene;(formerly;Entrezgene);Acc:103223956]
ENSCSAT00000007372.1	650	492.585	115.281	26	cdna;chromosome:ChlSab1.1:17:39851874:39853819:-1;gene:ENSCSAG00000009301.1;gene_biotype:protein_coding;transcript_biotype:protein_coding;gene_symbol:RNF5;description:ring;finger;protein;5;[Source:NCBI;gene;(formerly;Entrezgene);Acc:103221708]
ENSCSAT00000016727.1	1787	1629.51	115.268	86	cdna;chromosome:ChlSab1.1:20:12291070:12294311:-1;gene:ENSCSAG00000001802.1;gene_biotype:protein_coding;transcript_biotype:protein_coding;gene_symbol:PSMB4;description:proteasome;20S;subunit;beta;4;[Source:NCBI;gene;(formerly;Entrezgene);Acc:103224033]
ENSCSAT00000005284.1	3418	3260.51	115.215	172	cdna;chromosome:ChlSab1.1:2:89737003:89758425:1;gene:ENSCSAG00000007240.1;gene_biotype:protein_coding;transcript_biotype:protein_coding;gene_symbol:COL6A2;description:collagen;type;VI;alpha;2;chain;[Source:NCBI;gene;(formerly;Entrezgene);Acc:103220301]
ENSCSAT00000007991.1	2149	1991.51	115.152	105	cdna;chromosome:ChlSab1.1:5:3340040:3405166:-1;gene:ENSCSAG00000009914.1;gene_biotype:protein_coding;transcript_biotype:protein_coding;gene_symbol:TRAP1;description:TNF;receptor;associated;protein;1;[Source:NCBI;gene;(formerly;Entrezgene);Acc:103227549]
ENSCSAT00000003365.1	1259	1101.51	115.002	58	cdna;chromosome:ChlSab1.1:6:17028819:17037867:1;gene:ENSCSAG00000005336.1;gene_biotype:protein_coding;transcript_biotype:protein_coding;gene_symbol:KXD1;description:KxDL;motif;containing;1;[Source:NCBI;gene;(formerly;Entrezgene);Acc:103234185]
ENSCSAT00000012125.1	1430	1272.51	114.995	67	cdna;chromosome:ChlSab1.1:15:3493541:3513994:1;gene:ENSCSAG00000014034.1;gene_biotype:protein_coding;transcript_biotype:protein_coding;gene_symbol:TRA2B;description:transformer;2;beta;homolog;[Source:NCBI;gene;(formerly;Entrezgene);Acc:103221103]
ENSCSAT00000012894.1	1582	1424.51	114.99	75	cdna;chromosome:ChlSab1.1:X:15269026:15294592:-1;gene:ENSCSAG00000014796.1;gene_biotype:protein_coding;transcript_biotype:protein_coding;gene_symbol:RBBP7;description:RB;binding;protein;7,;chromatin;remodeling;factor;[Source:NCBI;gene;(formerly;Entrezgene);Acc:103231657]
ENSCSAT00000017601.1	722	564.572	114.937	29.711	cdna;chromosome:ChlSab1.1:20:108890788:108892869:-1;gene:ENSCSAG00000000932.1;gene_biotype:protein_coding;transcript_biotype:protein_coding;gene_symbol:LYPLA2;description:lysophospholipase;2;[Source:NCBI;gene;(formerly;Entrezgene);Acc:103225389]
ENSCSAT00000018892.1	192	57.046	114.859	3	cdna;chromosome:ChlSab1.1:22:30956078:30956269:-1;gene:ENSCSAG00000018802.1;gene_biotype:protein_coding;transcript_biotype:protein_coding
ENSCSAT00000011256.1	519	361.646	114.746	19	cdna;chromosome:ChlSab1.1:X:46010446:46014510:-1;gene:ENSCSAG00000013171.1;gene_biotype:protein_coding;transcript_biotype:protein_coding;gene_symbol:TIMM17B;description:translocase;of;inner;mitochondrial;membrane;17B;[Source:NCBI;gene;(formerly;Entrezgene);Acc:103231946]
ENSCSAT00000002957.1	3265	3107.51	114.562	163	cdna;chromosome:ChlSab1.1:11:53141462:53147795:1;gene:ENSCSAG00000004929.1;gene_biotype:protein_coding;transcript_biotype:protein_coding;gene_symbol:SHMT2;description:serine;hydroxymethyltransferase;2;[Source:NCBI;gene;(formerly;Entrezgene);Acc:103238558]
ENSCSAT00000007181.1	910	752.527	114.468	39.44	cdna;chromosome:ChlSab1.1:9:56136659:56138553:1;gene:ENSCSAG00000009151.1;gene_biotype:protein_coding;transcript_biotype:protein_coding;gene_symbol:COMTD1;description:catechol-O-methyltransferase;domain;containing;1;[Source:NCBI;gene;(formerly;Entrezgene);Acc:103215965]
ENSCSAT00000004606.1	3273	3115.51	114.268	163	cdna;chromosome:ChlSab1.1:11:44187231:44194246:1;gene:ENSCSAG00000006569.1;gene_biotype:protein_coding;transcript_biotype:protein_coding;gene_symbol:TMEM106C;description:transmembrane;protein;106C;[Source:NCBI;gene;(formerly;Entrezgene);Acc:103238214]
ENSCSAT00000001931.1	1056	898.514	114.246	47	cdna;chromosome:ChlSab1.1:5:60002544:60017894:1;gene:ENSCSAG00000003900.1;gene_biotype:protein_coding;transcript_biotype:protein_coding;gene_symbol:ATP6V0D1;description:ATPase;H+;transporting;V0;subunit;d1;[Source:HGNC;Symbol;Acc:HGNC:13724]
ENSCSAT00000016762.1	1076	918.514	114.136	48	cdna;chromosome:ChlSab1.1:6:47636094:47652772:-1;gene:ENSCSAG00000001767.1;gene_biotype:protein_coding;transcript_biotype:protein_coding;gene_symbol:RDH13;description:retinol;dehydrogenase;13;[Source:NCBI;gene;(formerly;Entrezgene);Acc:103235287]
ENSCSAT00000010015.1	154	38.286	114.093	2	cdna;chromosome:ChlSab1.1:23:50746087:50747039:1;gene:ENSCSAG00000011920.1;gene_biotype:protein_coding;transcript_biotype:protein_coding;gene_symbol:SPINK6;description:serine;peptidase;inhibitor;Kazal;type;6;[Source:HGNC;Symbol;Acc:HGNC:29486]
ENSCSAT00000012749.1	246	95.715	114.092	5	cdna;chromosome:ChlSab1.1:25:23632864:23633116:-1;gene:ENSCSAG00000014658.1;gene_biotype:pseudogene;transcript_biotype:pseudogene
ENSCSAT00000014564.1	387	229.838	114.032	12	cdna;chromosome:ChlSab1.1:25:1619917:1621385:1;gene:ENSCSAG00000016477.1;gene_biotype:protein_coding;transcript_biotype:protein_coding;gene_symbol:MRPL55;description:mitochondrial;ribosomal;protein;L55;[Source:NCBI;gene;(formerly;Entrezgene);Acc:103229964]
ENSCSAT00000018689.1	387	229.838	114.032	12	cdna;chromosome:ChlSab1.1:3:17979012:17979398:-1;gene:ENSCSAG00000018599.1;gene_biotype:protein_coding;transcript_biotype:protein_coding;gene_symbol:LHFPL6;description:LHFPL;tetraspan;subfamily;member;6;[Source:HGNC;Symbol;Acc:HGNC:6586]
ENSCSAT00000007581.1	4030	3872.51	113.927	202	cdna;chromosome:ChlSab1.1:11:8757799:8768379:-1;gene:ENSCSAG00000009501.1;gene_biotype:protein_coding;transcript_biotype:protein_coding;gene_symbol:M6PR;description:mannose-6-phosphate;receptor,;cation;dependent;[Source:NCBI;gene;(formerly;Entrezgene);Acc:103218540]
ENSCSAT00000013440.1	5756	5598.51	113.914	292	cdna;chromosome:ChlSab1.1:X:8091125:8173679:1;gene:ENSCSAG00000015344.1;gene_biotype:protein_coding;transcript_biotype:protein_coding;gene_symbol:TBL1X;description:transducin;beta;like;1;X-linked;[Source:NCBI;gene;(formerly;Entrezgene);Acc:103231576]
ENSCSAT00000011066.1	2421	2263.51	113.859	118	cdna;chromosome:ChlSab1.1:6:324517:358119:1;gene:ENSCSAG00000012996.1;gene_biotype:protein_coding;transcript_biotype:protein_coding;gene_symbol:HCN2;description:hyperpolarization;activated;cyclic;nucleotide;gated;potassium;and;sodium;channel;2;[Source:HGNC;Symbol;Acc:HGNC:4846]
ENSCSAT00000006197.1	2863	2705.51	113.825	141	cdna;chromosome:ChlSab1.1:1:7989101:7998105:-1;gene:ENSCSAG00000008145.1;gene_biotype:protein_coding;transcript_biotype:protein_coding;gene_symbol:RAB1B;description:RAB1B,;member;RAS;oncogene;family;[Source:NCBI;gene;(formerly;Entrezgene);Acc:103223866]
ENSCSAT00000001186.1	695	537.574	113.759	28	cdna;chromosome:ChlSab1.1:6:39127877:39134626:-1;gene:ENSCSAG00000003157.1;gene_biotype:protein_coding;transcript_biotype:protein_coding;gene_symbol:SNRPD2;description:small;nuclear;ribonucleoprotein;D2;polypeptide;[Source:NCBI;gene;(formerly;Entrezgene);Acc:103234875]
ENSCSAT00000007594.1	5367	5209.51	113.662	271.11	cdna;chromosome:ChlSab1.1:9:47679764:47697834:-1;gene:ENSCSAG00000009514.1;gene_biotype:protein_coding;transcript_biotype:protein_coding;gene_symbol:GHITM;description:growth;hormone;inducible;transmembrane;protein;[Source:NCBI;gene;(formerly;Entrezgene);Acc:103215897]
ENSCSAT00000008910.1	222	76.89	113.62	4	cdna;chromosome:ChlSab1.1:15:55895970:55900256:1;gene:ENSCSAG00000010817.1;gene_biotype:protein_coding;transcript_biotype:protein_coding;gene_symbol:ANAPC13;description:anaphase;promoting;complex;subunit;13;[Source:NCBI;gene;(formerly;Entrezgene);Acc:103241635]
ENSCSAT00000013928.1	1350	1192.51	113.552	62	cdna;chromosome:ChlSab1.1:8:28767723:28851697:-1;gene:ENSCSAG00000015834.1;gene_biotype:protein_coding;transcript_biotype:protein_coding;gene_symbol:GSR;description:glutathione-disulfide;reductase;[Source:HGNC;Symbol;Acc:HGNC:4623]
ENSCSAT00000013241.1	2584	2426.51	113.411	126	cdna;chromosome:ChlSab1.1:X:11282389:11316423:1;gene:ENSCSAG00000015172.1;gene_biotype:protein_coding;transcript_biotype:protein_coding;gene_symbol:PRPS2;description:phosphoribosyl;pyrophosphate;synthetase;2;[Source:NCBI;gene;(formerly;Entrezgene);Acc:103231598]
ENSCSAT00000001055.1	3356	3198.51	113.351	166	cdna;chromosome:ChlSab1.1:16:64438333:64448731:-1;gene:ENSCSAG00000003026.1;gene_biotype:protein_coding;transcript_biotype:protein_coding;gene_symbol:FKBP10;description:FKBP;prolyl;isomerase;10;[Source:NCBI;gene;(formerly;Entrezgene);Acc:103243437]
ENSCSAT00000003429.1	543	385.632	113.272	20	cdna;chromosome:ChlSab1.1:16:42957253:42962328:1;gene:ENSCSAG00000005396.1;gene_biotype:protein_coding;transcript_biotype:protein_coding;gene_symbol:MRPL27;description:mitochondrial;ribosomal;protein;L27;[Source:NCBI;gene;(formerly;Entrezgene);Acc:103242935]
ENSCSAT00000008246.1	3108	2950.51	113.256	153	cdna;chromosome:ChlSab1.1:8:119586659:119611142:1;gene:ENSCSAG00000010159.1;gene_biotype:protein_coding;transcript_biotype:protein_coding;gene_symbol:SQLE;description:squalene;epoxidase;[Source:NCBI;gene;(formerly;Entrezgene);Acc:103237411]
ENSCSAT00000003452.1	3862	3704.51	113.197	192	cdna;chromosome:ChlSab1.1:9:95506675:95530984:-1;gene:ENSCSAG00000005419.1;gene_biotype:protein_coding;transcript_biotype:protein_coding;gene_symbol:ACTR1A;description:actin;related;protein;1A;[Source:NCBI;gene;(formerly;Entrezgene);Acc:103216438]
ENSCSAT00000008743.1	3865	3707.51	113.106	192	cdna;chromosome:ChlSab1.1:11:6425324:6433583:1;gene:ENSCSAG00000010660.1;gene_biotype:protein_coding;transcript_biotype:protein_coding;gene_symbol:LTBR;description:lymphotoxin;beta;receptor;[Source:NCBI;gene;(formerly;Entrezgene);Acc:103218448]
ENSCSAT00000012677.1	3503	3345.51	112.941	173	cdna;chromosome:ChlSab1.1:21:27749514:27790881:-1;gene:ENSCSAG00000014588.1;gene_biotype:protein_coding;transcript_biotype:protein_coding;gene_symbol:GARS1;description:glycyl-tRNA;synthetase;1;[Source:NCBI;gene;(formerly;Entrezgene);Acc:103226274]
ENSCSAT00000018035.1	894	736.537	112.682	38	cdna;chromosome:ChlSab1.1:23:40070407:40071300:1;gene:ENSCSAG00000000500.1;gene_biotype:protein_coding;transcript_biotype:protein_coding
ENSCSAT00000006405.1	623	465.594	112.582	24	cdna;chromosome:ChlSab1.1:1:7636920:7665576:-1;gene:ENSCSAG00000008356.1;gene_biotype:protein_coding;transcript_biotype:protein_coding
ENSCSAT00000007647.1	1555	1397.51	112.523	72	cdna;chromosome:ChlSab1.1:17:38763206:38773768:1;gene:ENSCSAG00000009568.1;gene_biotype:protein_coding;transcript_biotype:protein_coding;gene_symbol:TAPBP;description:TAP;binding;protein;[Source:NCBI;gene;(formerly;Entrezgene);Acc:103221664]
ENSCSAT00000014748.1	2197	2039.51	112.442	105	cdna;chromosome:ChlSab1.1:2:342247:359295:-1;gene:ENSCSAG00000016652.1;gene_biotype:protein_coding;transcript_biotype:protein_coding;gene_symbol:TPD52L2;description:TPD52;like;2;[Source:HGNC;Symbol;Acc:HGNC:12007]
ENSCSAT00000018348.1	624	466.594	112.341	24	cdna;chromosome:ChlSab1.1:13:29145071:29145694:1;gene:ENSCSAG00000000187.1;gene_biotype:protein_coding;transcript_biotype:protein_coding;gene_symbol:SF3B5;description:splicing;factor;3b;subunit;5;[Source:NCBI;gene;(formerly;Entrezgene);Acc:103240244]
ENSCSAT00000001752.1	877	719.541	112.309	37	cdna;chromosome:ChlSab1.1:6:34902598:34925100:-1;gene:ENSCSAG00000003724.1;gene_biotype:protein_coding;transcript_biotype:protein_coding;gene_symbol:BLVRB;description:biliverdin;reductase;B;[Source:NCBI;gene;(formerly;Entrezgene);Acc:103234707]
ENSCSAT00000009455.1	488	330.669	112.285	17	cdna;chromosome:ChlSab1.1:16:7001259:7002270:-1;gene:ENSCSAG00000011371.1;gene_biotype:protein_coding;transcript_biotype:protein_coding;gene_symbol:SAT2;description:spermidine/spermine;N1-acetyltransferase;family;member;2;[Source:HGNC;Symbol;Acc:HGNC:23160]
ENSCSAT00000001690.1	4341	4183.51	112.244	215	cdna;chromosome:ChlSab1.1:1:77213836:77324875:-1;gene:ENSCSAG00000003661.1;gene_biotype:protein_coding;transcript_biotype:protein_coding;gene_symbol:PICALM;description:phosphatidylinositol;binding;clathrin;assembly;protein;[Source:NCBI;gene;(formerly;Entrezgene);Acc:103248165]
ENSCSAT00000011750.1	1580	1422.51	112.081	73	cdna;chromosome:ChlSab1.1:9:5877042:5922968:-1;gene:ENSCSAG00000013656.1;gene_biotype:protein_coding;transcript_biotype:protein_coding;gene_symbol:GDI2;description:GDP;dissociation;inhibitor;2;[Source:NCBI;gene;(formerly;Entrezgene);Acc:103237832]
ENSCSAT00000005823.1	1386	1228.51	112.002	63	cdna;chromosome:ChlSab1.1:1:8827122:8852792:-1;gene:ENSCSAG00000007801.1;gene_biotype:protein_coding;transcript_biotype:protein_coding;gene_symbol:FRMD8;description:FERM;domain;containing;8;[Source:HGNC;Symbol;Acc:HGNC:25462]
ENSCSAT00000004446.1	723	565.571	111.99	29	cdna;chromosome:ChlSab1.1:26:57087695:57091671:-1;gene:ENSCSAG00000006406.1;gene_biotype:protein_coding;transcript_biotype:protein_coding;gene_symbol:SNRPN;description:small;nuclear;ribonucleoprotein;polypeptide;N;[Source:NCBI;gene;(formerly;Entrezgene);Acc:103246035]
ENSCSAT00000012372.1	8253	8095.51	111.962	415	cdna;chromosome:ChlSab1.1:12:9503367:9585268:-1;gene:ENSCSAG00000014277.1;gene_biotype:protein_coding;transcript_biotype:protein_coding;gene_symbol:SPTAN1;description:spectrin;alpha,;non-erythrocytic;1;[Source:NCBI;gene;(formerly;Entrezgene);Acc:103239794]
ENSCSAT00000005432.1	997	839.515	111.868	43	cdna;chromosome:ChlSab1.1:6:9183835:9188870:-1;gene:ENSCSAG00000007406.1;gene_biotype:protein_coding;transcript_biotype:protein_coding;description:eukaryotic;translation;initiation;factor;3;subunit;G;[Source:NCBI;gene;(formerly;Entrezgene);Acc:103233881]
ENSCSAT00000003590.1	587	429.61	111.845	22	cdna;chromosome:ChlSab1.1:9:94005285:94006111:-1;gene:ENSCSAG00000005558.1;gene_biotype:protein_coding;transcript_biotype:protein_coding;gene_symbol:MRPL43;description:mitochondrial;ribosomal;protein;L43;[Source:NCBI;gene;(formerly;Entrezgene);Acc:103216395]
ENSCSAT00000016676.1	1116	958.514	111.651	49	cdna;chromosome:ChlSab1.1:20:10258070:10260871:1;gene:ENSCSAG00000001853.1;gene_biotype:protein_coding;transcript_biotype:protein_coding;gene_symbol:S100A4;description:S100;calcium;binding;protein;A4;[Source:NCBI;gene;(formerly;Entrezgene);Acc:103223963]
ENSCSAT00000019736.1	1566	1408.51	111.645	72	cdna;chromosome:ChlSab1.1:6:43064875:43066440:-1;gene:ENSCSAG00000019646.1;gene_biotype:protein_coding;transcript_biotype:protein_coding;gene_symbol:NUP62;description:nucleoporin;62;[Source:NCBI;gene;(formerly;Entrezgene);Acc:103235065]
ENSCSAT00000008062.1	2892	2734.51	111.535	139.645	cdna;chromosome:ChlSab1.1:17:36653183:36658033:-1;gene:ENSCSAG00000009972.1;gene_biotype:protein_coding;transcript_biotype:protein_coding;gene_symbol:RPL10A;description:ribosomal;protein;L10a;[Source:NCBI;gene;(formerly;Entrezgene);Acc:103221612]
ENSCSAT00000016226.1	1548	1390.51	111.519	71	cdna;scaffold:ChlSab1.1:KE148049.1:422674:427107:-1;gene:ENSCSAG00000018129.1;gene_biotype:protein_coding;transcript_biotype:protein_coding;gene_symbol:SF3B4;description:splicing;factor;3b;subunit;4;[Source:NCBI;gene;(formerly;Entrezgene);Acc:103247175]
ENSCSAT00000005175.1	1217	1059.51	111.315	54	cdna;chromosome:ChlSab1.1:22:60463037:60480690:1;gene:ENSCSAG00000007132.1;gene_biotype:protein_coding;transcript_biotype:protein_coding;gene_symbol:LRRC58;description:leucine;rich;repeat;containing;58;[Source:NCBI;gene;(formerly;Entrezgene);Acc:103228209]
ENSCSAT00000007688.1	865	707.541	111.126	36	cdna;chromosome:ChlSab1.1:17:38492858:38501281:1;gene:ENSCSAG00000009617.1;gene_biotype:protein_coding;transcript_biotype:protein_coding;gene_symbol:BAK1;description:BCL2;antagonist/killer;1;[Source:NCBI;gene;(formerly;Entrezgene);Acc:103221651]
ENSCSAT00000004853.1	7884	7726.51	111.09	393	cdna;chromosome:ChlSab1.1:X:128371517:128394861:-1;gene:ENSCSAG00000006809.1;gene_biotype:protein_coding;transcript_biotype:protein_coding;gene_symbol:HCFC1;description:host;cell;factor;C1;[Source:NCBI;gene;(formerly;Entrezgene);Acc:103232813]
ENSCSAT00000009128.1	2734	2576.51	111.047	131	cdna;chromosome:ChlSab1.1:1:305282:321270:-1;gene:ENSCSAG00000011038.1;gene_biotype:protein_coding;transcript_biotype:protein_coding;gene_symbol:RNH1;description:ribonuclease/angiogenin;inhibitor;1;[Source:NCBI;gene;(formerly;Entrezgene);Acc:103244237]
ENSCSAT00000010389.1	1299	1141.51	110.972	58	cdna;chromosome:ChlSab1.1:6:974144:995136:1;gene:ENSCSAG00000012300.1;gene_biotype:protein_coding;transcript_biotype:protein_coding;gene_symbol:STK11;description:serine/threonine;kinase;11;[Source:NCBI;gene;(formerly;Entrezgene);Acc:103233599]
ENSCSAT00000006461.1	6142	5984.51	110.958	304.033	cdna;chromosome:ChlSab1.1:16:16845491:16859554:-1;gene:ENSCSAG00000008412.1;gene_biotype:protein_coding;transcript_biotype:protein_coding;gene_symbol:SREBF1;description:sterol;regulatory;element;binding;transcription;factor;1;[Source:NCBI;gene;(formerly;Entrezgene);Acc:103242479]
ENSCSAT00000001955.1	1221	1063.51	110.896	54	cdna;chromosome:ChlSab1.1:16:57457720:57462249:-1;gene:ENSCSAG00000003923.1;gene_biotype:protein_coding;transcript_biotype:protein_coding;gene_symbol:PSMC5;description:proteasome;26S;subunit,;ATPase;5;[Source:NCBI;gene;(formerly;Entrezgene);Acc:103243218]
ENSCSAT00000000813.1	2641	2483.51	110.808	126	cdna;chromosome:ChlSab1.1:6:42108267:42112471:1;gene:ENSCSAG00000002795.1;gene_biotype:protein_coding;transcript_biotype:protein_coding;gene_symbol:PPP1R15A;description:protein;phosphatase;1;regulatory;subunit;15A;[Source:HGNC;Symbol;Acc:HGNC:14375]
ENSCSAT00000006715.1	2247	2089.51	110.797	106	cdna;chromosome:ChlSab1.1:8:138473441:138503661:-1;gene:ENSCSAG00000008653.1;gene_biotype:protein_coding;transcript_biotype:protein_coding;gene_symbol:BOP1;description:BOP1;ribosomal;biogenesis;factor;[Source:NCBI;gene;(formerly;Entrezgene);Acc:103237616]
ENSCSAT00000004035.1	2014	1856.51	110.585	94	cdna;chromosome:ChlSab1.1:11:46220090:46254602:-1;gene:ENSCSAG00000006020.1;gene_biotype:protein_coding;transcript_biotype:protein_coding;gene_symbol:RACGAP1;description:Rac;GTPase;activating;protein;1;[Source:HGNC;Symbol;Acc:HGNC:9804]
ENSCSAT00000007727.1	9128	8970.51	110.536	454	cdna;chromosome:ChlSab1.1:17:38381743:38456499:-1;gene:ENSCSAG00000009649.1;gene_biotype:protein_coding;transcript_biotype:protein_coding;gene_symbol:ITPR3;description:inositol;1,4,5-trisphosphate;receptor;type;3;[Source:NCBI;gene;(formerly;Entrezgene);Acc:103221654]
ENSCSAT00000010509.1	1701	1543.51	110.37	78	cdna;chromosome:ChlSab1.1:23:44554705:44570352:1;gene:ENSCSAG00000012414.1;gene_biotype:protein_coding;transcript_biotype:protein_coding;gene_symbol:DELE1;description:DAP3;binding;cell;death;enhancer;1;[Source:NCBI;gene;(formerly;Entrezgene);Acc:103244706]
ENSCSAT00000002383.1	1702	1544.51	110.298	78	cdna;chromosome:ChlSab1.1:1:58206072:58210945:1;gene:ENSCSAG00000004358.1;gene_biotype:protein_coding;transcript_biotype:protein_coding;gene_symbol:TPP1;description:tripeptidyl;peptidase;1;[Source:HGNC;Symbol;Acc:HGNC:2073]
ENSCSAT00000002981.1	15287	15129.5	110.29	764	cdna;chromosome:ChlSab1.1:11:53039364:53125776:1;gene:ENSCSAG00000004953.1;gene_biotype:protein_coding;transcript_biotype:protein_coding;gene_symbol:LRP1;description:LDL;receptor;related;protein;1;[Source:NCBI;gene;(formerly;Entrezgene);Acc:103238555]
ENSCSAT00000005199.1	950	792.518	110.235	40	cdna;chromosome:ChlSab1.1:1:9949762:9964432:1;gene:ENSCSAG00000007151.1;gene_biotype:protein_coding;transcript_biotype:protein_coding;gene_symbol:BAD;description:BCL2;associated;agonist;of;cell;death;[Source:NCBI;gene;(formerly;Entrezgene);Acc:103233293]
ENSCSAT00000000278.1	1961	1803.51	110.202	91	cdna;chromosome:ChlSab1.1:16:73502123:73570710:-1;gene:ENSCSAG00000002261.1;gene_biotype:protein_coding;transcript_biotype:protein_coding;gene_symbol:NPLOC4;description:NPL4;homolog,;ubiquitin;recognition;factor;[Source:NCBI;gene;(formerly;Entrezgene);Acc:103243723]
ENSCSAT00000008335.1	1467	1309.51	110.078	66	cdna;chromosome:ChlSab1.1:24:80016232:80019120:-1;gene:ENSCSAG00000010250.1;gene_biotype:protein_coding;transcript_biotype:protein_coding;description:heat;shock;protein;90;alpha;family;class;A;member;1;[Source:NCBI;gene;(formerly;Entrezgene);Acc:103229726]
ENSCSAT00000006347.1	1487	1329.51	110.065	67	cdna;chromosome:ChlSab1.1:17:41712528:41714126:1;gene:ENSCSAG00000008293.1;gene_biotype:protein_coding;transcript_biotype:protein_coding;gene_symbol:IER3;description:immediate;early;response;3;[Source:NCBI;gene;(formerly;Entrezgene);Acc:103221817]
ENSCSAT00000011387.1	2343	2185.51	109.927	110	cdna;chromosome:ChlSab1.1:12:18253324:18285938:-1;gene:ENSCSAG00000013301.1;gene_biotype:protein_coding;transcript_biotype:protein_coding;gene_symbol:GSN;description:gelsolin;[Source:HGNC;Symbol;Acc:HGNC:4620]
ENSCSAT00000015666.1	7113	6955.51	109.902	350	cdna;chromosome:ChlSab1.1:28:20098586:20132859:1;gene:ENSCSAG00000017574.1;gene_biotype:protein_coding;transcript_biotype:protein_coding;gene_symbol:INTS1;description:integrator;complex;subunit;1;[Source:NCBI;gene;(formerly;Entrezgene);Acc:103246881]
ENSCSAT00000011755.1	2226	2068.51	109.81	104	cdna;chromosome:ChlSab1.1:X:44410598:44416818:1;gene:ENSCSAG00000013666.1;gene_biotype:protein_coding;transcript_biotype:protein_coding;gene_symbol:CDK16;description:cyclin;dependent;kinase;16;[Source:HGNC;Symbol;Acc:HGNC:8749]
ENSCSAT00000019512.1	449	291.703	109.797	14.664	cdna;chromosome:ChlSab1.1:4:77114421:77114869:1;gene:ENSCSAG00000019422.1;gene_biotype:protein_coding;transcript_biotype:protein_coding
ENSCSAT00000002206.1	1053	895.514	109.751	45	cdna;chromosome:ChlSab1.1:1:63406597:63413352:1;gene:ENSCSAG00000004176.1;gene_biotype:protein_coding;transcript_biotype:protein_coding;gene_symbol:FOLR1;description:folate;receptor;alpha;[Source:NCBI;gene;(formerly;Entrezgene);Acc:103247991]
ENSCSAT00000006465.1	2549	2391.51	109.591	120	cdna;chromosome:ChlSab1.1:23:81330351:81339882:-1;gene:ENSCSAG00000008415.1;gene_biotype:protein_coding;transcript_biotype:protein_coding;gene_symbol:HNRNPH1;description:heterogeneous;nuclear;ribonucleoprotein;H1;[Source:HGNC;Symbol;Acc:HGNC:5041]
ENSCSAT00000017491.1	716	558.573	109.482	28	cdna;chromosome:ChlSab1.1:20:100952722:100963323:1;gene:ENSCSAG00000001042.1;gene_biotype:protein_coding;transcript_biotype:protein_coding;description:protein;tyrosine;phosphatase;4A2;[Source:NCBI;gene;(formerly;Entrezgene);Acc:103225209]
ENSCSAT00000013748.1	5828	5670.51	109.438	284.135	cdna;chromosome:ChlSab1.1:27:46912819:46956164:1;gene:ENSCSAG00000015656.1;gene_biotype:protein_coding;transcript_biotype:protein_coding;gene_symbol:LETM1;description:leucine;zipper;and;EF-hand;containing;transmembrane;protein;1;[Source:NCBI;gene;(formerly;Entrezgene);Acc:103246477]
ENSCSAT00000012461.1	637	479.587	109.298	24	cdna;chromosome:ChlSab1.1:2:18472155:18475801:-1;gene:ENSCSAG00000014370.1;gene_biotype:protein_coding;transcript_biotype:protein_coding;gene_symbol:SYS1;description:SYS1;golgi;trafficking;protein;[Source:NCBI;gene;(formerly;Entrezgene);Acc:103245387]
ENSCSAT00000000038.1	1178	1020.51	109.149	51	cdna;chromosome:ChlSab1.1:20:8516211:8526727:-1;gene:ENSCSAG00000002022.1;gene_biotype:protein_coding;transcript_biotype:protein_coding
ENSCSAT00000007833.1	3020	2862.51	109.108	143	cdna;chromosome:ChlSab1.1:14:80257029:80285595:1;gene:ENSCSAG00000009800.1;gene_biotype:protein_coding;transcript_biotype:protein_coding;gene_symbol:GTF3C2;description:general;transcription;factor;IIIC;subunit;2;[Source:HGNC;Symbol;Acc:HGNC:4665]
ENSCSAT00000015172.1	1339	1181.51	109.064	59	cdna;chromosome:ChlSab1.1:27:9074923:9086517:-1;gene:ENSCSAG00000017078.1;gene_biotype:protein_coding;transcript_biotype:protein_coding;gene_symbol:UCHL1;description:ubiquitin;C-terminal;hydrolase;L1;[Source:NCBI;gene;(formerly;Entrezgene);Acc:103246177]
ENSCSAT00000006497.1	1993	1835.51	109.004	91.608	cdna;chromosome:ChlSab1.1:17:40841549:40920342:1;gene:ENSCSAG00000008447.1;gene_biotype:protein_coding;transcript_biotype:protein_coding
ENSCSAT00000002337.1	959	801.518	108.997	40	cdna;chromosome:ChlSab1.1:7:36338386:36344407:1;gene:ENSCSAG00000004308.1;gene_biotype:protein_coding;transcript_biotype:protein_coding;gene_symbol:SPP1;description:secreted;phosphoprotein;1;[Source:NCBI;gene;(formerly;Entrezgene);Acc:103235944]
ENSCSAT00000018349.1	819	661.545	108.948	33	cdna;chromosome:ChlSab1.1:13:34010228:34011046:1;gene:ENSCSAG00000000186.1;gene_biotype:protein_coding;transcript_biotype:protein_coding;gene_symbol:CITED2;description:Cbp/p300;interacting;transactivator;with;Glu/Asp;rich;carboxy-terminal;domain;2;[Source:NCBI;gene;(formerly;Entrezgene);Acc:103240279]
ENSCSAT00000015491.1	5313	5155.51	108.875	257	cdna;chromosome:ChlSab1.1:4:890202:948279:-1;gene:ENSCSAG00000017399.1;gene_biotype:protein_coding;transcript_biotype:protein_coding;gene_symbol:SLC12A7;description:solute;carrier;family;12;member;7;[Source:NCBI;gene;(formerly;Entrezgene);Acc:103214921]
ENSCSAT00000013074.1	5460	5302.51	108.74	264	cdna;chromosome:ChlSab1.1:22:10865724:10934200:1;gene:ENSCSAG00000014979.1;gene_biotype:protein_coding;transcript_biotype:protein_coding;gene_symbol:DAG1;description:dystroglycan;1;[Source:NCBI;gene;(formerly;Entrezgene);Acc:103227635]
ENSCSAT00000015547.1	3496	3338.51	108.598	166	cdna;chromosome:ChlSab1.1:3:90709298:90887360:1;gene:ENSCSAG00000017453.1;gene_biotype:protein_coding;transcript_biotype:protein_coding;gene_symbol:ATP11A;description:ATPase;phospholipid;transporting;11A;[Source:NCBI;gene;(formerly;Entrezgene);Acc:103214821]
ENSCSAT00000004532.1	4567	4409.51	108.481	219.017	cdna;chromosome:ChlSab1.1:6:11818968:11825412:1;gene:ENSCSAG00000006493.1;gene_biotype:protein_coding;transcript_biotype:protein_coding;gene_symbol:NACC1;description:nucleus;accumbens;associated;1;[Source:NCBI;gene;(formerly;Entrezgene);Acc:103234012]
ENSCSAT00000017490.1	1789	1631.51	108.433	81	cdna;chromosome:ChlSab1.1:20:100832461:100859630:-1;gene:ENSCSAG00000001043.1;gene_biotype:protein_coding;transcript_biotype:protein_coding;gene_symbol:KHDRBS1;description:KH;RNA;binding;domain;containing,;signal;transduction;associated;1;[Source:NCBI;gene;(formerly;Entrezgene);Acc:103225208]
ENSCSAT00000018928.1	1044	886.514	108.401	44	cdna;chromosome:ChlSab1.1:6:11479407:11480450:1;gene:ENSCSAG00000018838.1;gene_biotype:protein_coding;transcript_biotype:protein_coding;gene_symbol:JUNB;description:JunB;proto-oncogene,;AP-1;transcription;factor;subunit;[Source:NCBI;gene;(formerly;Entrezgene);Acc:103233990]
ENSCSAT00000012419.1	2357	2199.51	108.235	109	cdna;chromosome:ChlSab1.1:4:90497754:90605481:1;gene:ENSCSAG00000014328.1;gene_biotype:protein_coding;transcript_biotype:protein_coding;gene_symbol:CAST;description:calpastatin;[Source:NCBI;gene;(formerly;Entrezgene);Acc:103224994]
ENSCSAT00000008568.1	4750	4592.51	107.965	227.021	cdna;chromosome:ChlSab1.1:10:88106072:88303734:1;gene:ENSCSAG00000010485.1;gene_biotype:protein_coding;transcript_biotype:protein_coding;gene_symbol:BMPR2;description:bone;morphogenetic;protein;receptor;type;2;[Source:NCBI;gene;(formerly;Entrezgene);Acc:103217668]
ENSCSAT00000016266.1	724	566.57	107.937	28	cdna;chromosome:ChlSab1.1:28:9498161:9526542:1;gene:ENSCSAG00000018171.1;gene_biotype:protein_coding;transcript_biotype:protein_coding;gene_symbol:BCL7B;description:BAF;chromatin;remodeling;complex;subunit;BCL7B;[Source:NCBI;gene;(formerly;Entrezgene);Acc:103246636]
ENSCSAT00000016256.1	7819	7661.51	107.757	378	cdna;chromosome:ChlSab1.1:18:21107369:21252693:1;gene:ENSCSAG00000018160.1;gene_biotype:protein_coding;transcript_biotype:protein_coding;gene_symbol:ALPK2;description:alpha;kinase;2;[Source:NCBI;gene;(formerly;Entrezgene);Acc:103244213]
ENSCSAT00000001982.1	2306	2148.51	107.754	106	cdna;chromosome:ChlSab1.1:5:59566171:59592843:-1;gene:ENSCSAG00000003952.1;gene_biotype:protein_coding;transcript_biotype:protein_coding;gene_symbol:NUTF2;description:nuclear;transport;factor;2;[Source:NCBI;gene;(formerly;Entrezgene);Acc:103233258]
ENSCSAT00000016247.1	2043	1885.51	107.726	93	cdna;chromosome:ChlSab1.1:28:10197503:10230468:1;gene:ENSCSAG00000018151.1;gene_biotype:protein_coding;transcript_biotype:protein_coding;gene_symbol:POR;description:P450;(cytochrome);oxidoreductase;[Source:NCBI;gene;(formerly;Entrezgene);Acc:103246654]
ENSCSAT00000005253.1	1273	1115.51	107.685	55	cdna;chromosome:ChlSab1.1:17:69207684:69219016:1;gene:ENSCSAG00000007210.1;gene_biotype:protein_coding;transcript_biotype:protein_coding;gene_symbol:SERPINB6;description:serpin;family;B;member;6;[Source:NCBI;gene;(formerly;Entrezgene);Acc:103222289]
ENSCSAT00000004758.1	3668	3510.51	107.632	173	cdna;chromosome:ChlSab1.1:19:20929509:20982835:-1;gene:ENSCSAG00000006716.1;gene_biotype:protein_coding;transcript_biotype:protein_coding;gene_symbol:TMEM184B;description:transmembrane;protein;184B;[Source:NCBI;gene;(formerly;Entrezgene);Acc:103223310]
ENSCSAT00000005673.1	1381	1223.51	107.515	60.23	cdna;chromosome:ChlSab1.1:1:9112710:9116898:-1;gene:ENSCSAG00000007642.1;gene_biotype:protein_coding;transcript_biotype:protein_coding;gene_symbol:TM7SF2;description:transmembrane;7;superfamily;member;2;[Source:HGNC;Symbol;Acc:HGNC:11863]
ENSCSAT00000005129.1	666	508.574	107.363	25	cdna;chromosome:ChlSab1.1:26:48674134:48678862:-1;gene:ENSCSAG00000007083.1;gene_biotype:protein_coding;transcript_biotype:protein_coding;gene_symbol:EMC4;description:ER;membrane;protein;complex;subunit;4;[Source:NCBI;gene;(formerly;Entrezgene);Acc:103245905]
ENSCSAT00000011529.1	228	81.419	107.3	4	cdna;chromosome:ChlSab1.1:8:74096037:74099441:1;gene:ENSCSAG00000013440.1;gene_biotype:protein_coding;transcript_biotype:protein_coding;gene_symbol:PKIA;description:cAMP-dependent;protein;kinase;inhibitor;alpha;[Source:NCBI;gene;(formerly;Entrezgene);Acc:103237001]
ENSCSAT00000010764.1	748	590.563	107.25	29	cdna;chromosome:ChlSab1.1:25:45731326:45739508:1;gene:ENSCSAG00000012676.1;gene_biotype:protein_coding;transcript_biotype:protein_coding;gene_symbol:ARPC5;description:actin;related;protein;2/3;complex;subunit;5;[Source:HGNC;Symbol;Acc:HGNC:708]
ENSCSAT00000013980.1	1788	1630.51	107.16	80	cdna;chromosome:ChlSab1.1:12:1511124:1525440:1;gene:ENSCSAG00000015884.1;gene_biotype:protein_coding;transcript_biotype:protein_coding;gene_symbol:AGPAT2;description:1-acylglycerol-3-phosphate;O-acyltransferase;2;[Source:NCBI;gene;(formerly;Entrezgene);Acc:103239619]
ENSCSAT00000000288.1	3909	3751.51	107.122	184	cdna;chromosome:ChlSab1.1:11:115560662:115619029:-1;gene:ENSCSAG00000002269.1;gene_biotype:protein_coding;transcript_biotype:protein_coding;gene_symbol:PXN;description:paxillin;[Source:NCBI;gene;(formerly;Entrezgene);Acc:103239245]
ENSCSAT00000004959.1	1830	1672.51	107.081	82	cdna;chromosome:ChlSab1.1:6:9866534:9914682:1;gene:ENSCSAG00000006939.1;gene_biotype:protein_coding;transcript_biotype:protein_coding;gene_symbol:CARM1;description:coactivator;associated;arginine;methyltransferase;1;[Source:HGNC;Symbol;Acc:HGNC:23393]
ENSCSAT00000005039.1	1932	1774.51	107.08	87	cdna;chromosome:ChlSab1.1:6:9630113:9646389:1;gene:ENSCSAG00000007045.1;gene_biotype:protein_coding;transcript_biotype:protein_coding;gene_symbol:SLC44A2;description:solute;carrier;family;44;member;2;[Source:HGNC;Symbol;Acc:HGNC:17292]
ENSCSAT00000004941.1	1647	1489.51	107.04	73	cdna;chromosome:ChlSab1.1:X:128128271:128151823:-1;gene:ENSCSAG00000006911.1;gene_biotype:protein_coding;transcript_biotype:protein_coding;gene_symbol:BCAP31;description:B;cell;receptor;associated;protein;31;[Source:HGNC;Symbol;Acc:HGNC:16695]
ENSCSAT00000000621.1	6730	6572.51	107.002	322	cdna;chromosome:ChlSab1.1:16:68047491:68084778:1;gene:ENSCSAG00000002605.1;gene_biotype:protein_coding;transcript_biotype:protein_coding;gene_symbol:KPNB1;description:karyopherin;subunit;beta;1;[Source:NCBI;gene;(formerly;Entrezgene);Acc:103243578]
ENSCSAT00000003382.1	3220	3062.51	106.88	149.867	cdna;chromosome:ChlSab1.1:6:16905472:16910030:-1;gene:ENSCSAG00000005350.1;gene_biotype:protein_coding;transcript_biotype:protein_coding;gene_symbol:ISYNA1;description:inositol-3-phosphate;synthase;1;[Source:NCBI;gene;(formerly;Entrezgene);Acc:103234182]
ENSCSAT00000000438.1	2447	2289.51	106.842	112	cdna;chromosome:ChlSab1.1:6:43026286:43035533:-1;gene:ENSCSAG00000002420.1;gene_biotype:protein_coding;transcript_biotype:protein_coding;gene_symbol:AKT1S1;description:AKT1;substrate;1;[Source:NCBI;gene;(formerly;Entrezgene);Acc:103235060]
ENSCSAT00000010427.1	3745	3587.51	106.505	174.943	cdna;chromosome:ChlSab1.1:6:841615:855214:-1;gene:ENSCSAG00000012336.1;gene_biotype:protein_coding;transcript_biotype:protein_coding;gene_symbol:POLR2E;description:RNA;polymerase;II,;I;and;III;subunit;E;[Source:NCBI;gene;(formerly;Entrezgene);Acc:103233592]
ENSCSAT00000009332.1	2230	2072.51	106.437	101	cdna;chromosome:ChlSab1.1:24:70456095:70486087:-1;gene:ENSCSAG00000011242.1;gene_biotype:protein_coding;transcript_biotype:protein_coding;gene_symbol:LGMN;description:legumain;[Source:NCBI;gene;(formerly;Entrezgene);Acc:103229573]
ENSCSAT00000010128.1	692	534.574	106.419	26.047	cdna;chromosome:ChlSab1.1:15:34206654:34218956:1;gene:ENSCSAG00000012048.1;gene_biotype:protein_coding;transcript_biotype:protein_coding;description:signal;sequence;receptor;subunit;3;[Source:NCBI;gene;(formerly;Entrezgene);Acc:103241428]
ENSCSAT00000009689.1	528	370.642	106.068	18	cdna;chromosome:ChlSab1.1:6:2108212:2121571:-1;gene:ENSCSAG00000011599.1;gene_biotype:protein_coding;transcript_biotype:protein_coding;gene_symbol:LSM7;description:LSM7;homolog,;U6;small;nuclear;RNA;and;mRNA;degradation;associated;[Source:NCBI;gene;(formerly;Entrezgene);Acc:103233635]
ENSCSAT00000003909.1	1352	1194.51	106.048	58	cdna;chromosome:ChlSab1.1:16:33609202:33738289:-1;gene:ENSCSAG00000005874.1;gene_biotype:protein_coding;transcript_biotype:protein_coding;gene_symbol:VMP1;description:vacuole;membrane;protein;1;[Source:NCBI;gene;(formerly;Entrezgene);Acc:103242822]
ENSCSAT00000000379.1	2424	2266.51	105.999	110	cdna;chromosome:ChlSab1.1:16:70941562:70947736:-1;gene:ENSCSAG00000002363.1;gene_biotype:protein_coding;transcript_biotype:protein_coding;gene_symbol:LGALS3BP;description:galectin;3;binding;protein;[Source:NCBI;gene;(formerly;Entrezgene);Acc:103243670]
ENSCSAT00000001853.1	3476	3318.51	105.962	161	cdna;chromosome:ChlSab1.1:6:34052577:34085782:1;gene:ENSCSAG00000003826.1;gene_biotype:protein_coding;transcript_biotype:protein_coding;gene_symbol:SUPT5H;description:SPT5;homolog,;DSIF;elongation;factor;subunit;[Source:NCBI;gene;(formerly;Entrezgene);Acc:103234674]
ENSCSAT00000010955.1	3833	3675.51	105.772	178	cdna;chromosome:ChlSab1.1:6:358917:377089:-1;gene:ENSCSAG00000012942.1;gene_biotype:protein_coding;transcript_biotype:protein_coding;gene_symbol:POLRMT;description:RNA;polymerase;mitochondrial;[Source:HGNC;Symbol;Acc:HGNC:9200]
ENSCSAT00000006091.1	1419	1261.51	105.61	61	cdna;chromosome:ChlSab1.1:16:17373039:17408663:-1;gene:ENSCSAG00000008040.1;gene_biotype:protein_coding;transcript_biotype:protein_coding;gene_symbol:SHMT1;description:serine;hydroxymethyltransferase;1;[Source:HGNC;Symbol;Acc:HGNC:10850]
ENSCSAT00000011149.1	3095	2937.51	105.578	142	cdna;chromosome:ChlSab1.1:17:20222590:20243809:1;gene:ENSCSAG00000013052.1;gene_biotype:protein_coding;transcript_biotype:protein_coding;gene_symbol:MCM3;description:minichromosome;maintenance;complex;component;3;[Source:NCBI;gene;(formerly;Entrezgene);Acc:103221368]
ENSCSAT00000012065.1	2957	2799.51	105.322	135	cdna;chromosome:ChlSab1.1:9:3192523:3238361:-1;gene:ENSCSAG00000013981.1;gene_biotype:protein_coding;transcript_biotype:protein_coding;gene_symbol:PITRM1;description:pitrilysin;metallopeptidase;1;[Source:HGNC;Symbol;Acc:HGNC:17663]
ENSCSAT00000000140.1	1466	1308.51	105.155	63	cdna;chromosome:ChlSab1.1:1:125285056:125305549:1;gene:ENSCSAG00000002124.1;gene_biotype:protein_coding;transcript_biotype:protein_coding;gene_symbol:VPS26B;description:VPS26,;retromer;complex;component;B;[Source:NCBI;gene;(formerly;Entrezgene);Acc:103248895]
ENSCSAT00000016389.1	3192	3034.51	105.083	146	cdna;chromosome:ChlSab1.1:28:1620359:1646075:-1;gene:ENSCSAG00000018292.1;gene_biotype:protein_coding;transcript_biotype:protein_coding;description:glucuronidase;beta;[Source:NCBI;gene;(formerly;Entrezgene);Acc:103246571]
ENSCSAT00000002230.1	1489	1331.51	104.979	64	cdna;chromosome:ChlSab1.1:11:65371044:65434820:1;gene:ENSCSAG00000004189.1;gene_biotype:protein_coding;transcript_biotype:protein_coding;gene_symbol:RAB3IP;description:RAB3A;interacting;protein;[Source:NCBI;gene;(formerly;Entrezgene);Acc:103238704]
ENSCSAT00000003512.1	4617	4459.51	104.808	214	cdna;chromosome:ChlSab1.1:16:42646812:42702852:-1;gene:ENSCSAG00000005481.1;gene_biotype:protein_coding;transcript_biotype:protein_coding;gene_symbol:ABCC3;description:ATP;binding;cassette;subfamily;C;member;3;[Source:NCBI;gene;(formerly;Entrezgene);Acc:103242931]
ENSCSAT00000010848.1	3309	3151.51	104.646	151	cdna;chromosome:ChlSab1.1:2:36134760:36191425:1;gene:ENSCSAG00000012752.1;gene_biotype:protein_coding;transcript_biotype:protein_coding;gene_symbol:TPX2;description:TPX2;microtubule;nucleation;factor;[Source:NCBI;gene;(formerly;Entrezgene);Acc:103248026]
ENSCSAT00000006893.1	2746	2588.51	104.626	124	cdna;chromosome:ChlSab1.1:22:51787340:51812026:-1;gene:ENSCSAG00000008921.1;gene_biotype:protein_coding;transcript_biotype:protein_coding;gene_symbol:COPG1;description:COPI;coat;complex;subunit;gamma;1;[Source:HGNC;Symbol;Acc:HGNC:2236]
ENSCSAT00000007933.1	387	229.838	104.529	11	cdna;chromosome:ChlSab1.1:12:47682192:47701273:1;gene:ENSCSAG00000009865.1;gene_biotype:protein_coding;transcript_biotype:protein_coding;gene_symbol:NDUFB6;description:NADH:ubiquinone;oxidoreductase;subunit;B6;[Source:NCBI;gene;(formerly;Entrezgene);Acc:103219306]
ENSCSAT00000009965.1	3654	3496.51	104.315	167	cdna;chromosome:ChlSab1.1:6:1835993:1851039:-1;gene:ENSCSAG00000011875.1;gene_biotype:protein_coding;transcript_biotype:protein_coding;gene_symbol:MKNK2;description:MAPK;interacting;serine/threonine;kinase;2;[Source:NCBI;gene;(formerly;Entrezgene);Acc:103233649]
ENSCSAT00000018901.1	639	481.587	104.308	23	cdna;chromosome:ChlSab1.1:22:51749948:51750586:1;gene:ENSCSAG00000018811.1;gene_biotype:protein_coding;transcript_biotype:protein_coding;gene_symbol:H1-10;description:H1;histone;family;member;X;[Source:NCBI;gene;(formerly;Entrezgene);Acc:103228076]
ENSCSAT00000017933.1	330	173.434	104.188	8.273	cdna;chromosome:ChlSab1.1:1:97614976:97615305:1;gene:ENSCSAG00000000602.1;gene_biotype:protein_coding;transcript_biotype:protein_coding;description:prothymosin;alpha;[Source:NCBI;gene;(formerly;Entrezgene);Acc:103248380]
ENSCSAT00000008090.1	1059	901.514	104.175	43	cdna;chromosome:ChlSab1.1:2:57473596:57477700:1;gene:ENSCSAG00000009999.1;gene_biotype:protein_coding;transcript_biotype:protein_coding
ENSCSAT00000013637.1	9173	9015.51	104.17	430	cdna;chromosome:ChlSab1.1:22:9964651:9996626:-1;gene:ENSCSAG00000015684.1;gene_biotype:protein_coding;transcript_biotype:protein_coding;gene_symbol:COL7A1;description:collagen;type;VII;alpha;1;chain;[Source:NCBI;gene;(formerly;Entrezgene);Acc:103227595]
ENSCSAT00000006076.1	1627	1469.51	104.038	70	cdna;chromosome:ChlSab1.1:6:7743361:7757305:1;gene:ENSCSAG00000008024.1;gene_biotype:protein_coding;transcript_biotype:protein_coding;gene_symbol:RAB11B;description:RAB11B,;member;RAS;oncogene;family;[Source:NCBI;gene;(formerly;Entrezgene);Acc:103233840]
ENSCSAT00000000199.1	3415	3257.51	103.923	155	cdna;chromosome:ChlSab1.1:6:43437950:43446063:1;gene:ENSCSAG00000002181.1;gene_biotype:protein_coding;transcript_biotype:protein_coding;gene_symbol:NR1H2;description:nuclear;receptor;subfamily;1;group;H;member;2;[Source:NCBI;gene;(formerly;Entrezgene);Acc:103235078]
ENSCSAT00000009940.1	5181	5023.51	103.91	239	cdna;chromosome:ChlSab1.1:6:1901507:1951314:-1;gene:ENSCSAG00000011851.1;gene_biotype:protein_coding;transcript_biotype:protein_coding;gene_symbol:AP3D1;description:adaptor;related;protein;complex;3;subunit;delta;1;[Source:NCBI;gene;(formerly;Entrezgene);Acc:103233646]
ENSCSAT00000014152.1	1677	1519.51	103.877	72.27	cdna;chromosome:ChlSab1.1:14:22271291:22275877:-1;gene:ENSCSAG00000016057.1;gene_biotype:protein_coding;transcript_biotype:protein_coding
ENSCSAT00000004163.1	2601	2443.51	103.684	116	cdna;chromosome:ChlSab1.1:16:30036766:30097088:1;gene:ENSCSAG00000006125.1;gene_biotype:protein_coding;transcript_biotype:protein_coding;gene_symbol:HNF1B;description:HNF1;homeobox;B;[Source:NCBI;gene;(formerly;Entrezgene);Acc:103242779]
ENSCSAT00000008625.1	958	800.518	103.676	38	cdna;chromosome:ChlSab1.1:2:55376171:55415893:-1;gene:ENSCSAG00000010544.1;gene_biotype:protein_coding;transcript_biotype:protein_coding;gene_symbol:PSMF1;description:proteasome;inhibitor;subunit;1;[Source:NCBI;gene;(formerly;Entrezgene);Acc:103215944]
ENSCSAT00000006415.1	769	611.557	103.569	29	cdna;chromosome:ChlSab1.1:2:83297315:83303581:-1;gene:ENSCSAG00000008397.1;gene_biotype:protein_coding;transcript_biotype:protein_coding
ENSCSAT00000000448.1	2502	2344.51	103.404	111	cdna;chromosome:ChlSab1.1:6:42979674:42994865:1;gene:ENSCSAG00000002431.1;gene_biotype:protein_coding;transcript_biotype:protein_coding;gene_symbol:MED25;description:mediator;complex;subunit;25;[Source:NCBI;gene;(formerly;Entrezgene);Acc:103235057]
ENSCSAT00000017799.1	855	697.541	103.326	33	cdna;chromosome:ChlSab1.1:20:125504325:125515160:1;gene:ENSCSAG00000000736.1;gene_biotype:protein_coding;transcript_biotype:protein_coding;gene_symbol:ICMT;description:isoprenylcysteine;carboxyl;methyltransferase;[Source:NCBI;gene;(formerly;Entrezgene);Acc:103225698]
ENSCSAT00000017341.1	1236	1078.51	103.279	51	cdna;chromosome:ChlSab1.1:20:88827530:88831175:-1;gene:ENSCSAG00000001192.1;gene_biotype:protein_coding;transcript_biotype:protein_coding;gene_symbol:ATP6V0B;description:ATPase;H+;transporting;V0;subunit;b;[Source:NCBI;gene;(formerly;Entrezgene);Acc:103224952]
ENSCSAT00000013619.1	1067	909.514	103.259	43	cdna;chromosome:ChlSab1.1:14:33064542:33080366:-1;gene:ENSCSAG00000015542.1;gene_biotype:protein_coding;transcript_biotype:protein_coding;gene_symbol:MTHFD2;description:methylenetetrahydrofolate;dehydrogenase;(NADP+;dependent);2,;methenyltetrahydrofolate;cyclohydrolase;[Source:HGNC;Symbol;Acc:HGNC:7434]
ENSCSAT00000019391.1	111	23.718	103.102	1.12	cdna;chromosome:ChlSab1.1:17:34112214:34112324:1;gene:ENSCSAG00000019301.1;gene_biotype:protein_coding;transcript_biotype:protein_coding
ENSCSAT00000003658.1	433	275.723	102.976	13	cdna;chromosome:ChlSab1.1:6:15816030:15826232:1;gene:ENSCSAG00000005624.1;gene_biotype:protein_coding;transcript_biotype:protein_coding;gene_symbol:DDA1;description:DET1;and;DDB1;associated;1;[Source:HGNC;Symbol;Acc:HGNC:28360]
ENSCSAT00000017471.1	1855	1697.51	102.93	80	cdna;chromosome:ChlSab1.1:20:100052535:100095980:1;gene:ENSCSAG00000001062.1;gene_biotype:protein_coding;transcript_biotype:protein_coding;gene_symbol:YARS1;description:tyrosyl-tRNA;synthetase;1;[Source:NCBI;gene;(formerly;Entrezgene);Acc:103225174]
ENSCSAT00000006252.1	1580	1422.51	102.869	67	cdna;chromosome:ChlSab1.1:19:18144545:18157971:1;gene:ENSCSAG00000008200.1;gene_biotype:protein_coding;transcript_biotype:protein_coding;gene_symbol:HMOX1;description:heme;oxygenase;1;[Source:NCBI;gene;(formerly;Entrezgene);Acc:103223230]
ENSCSAT00000002973.1	282	127.499	102.78	6	cdna;chromosome:ChlSab1.1:16:45687111:45701366:-1;gene:ENSCSAG00000004942.1;gene_biotype:protein_coding;transcript_biotype:protein_coding
ENSCSAT00000005990.1	2367	2209.51	102.598	103.793	cdna;chromosome:ChlSab1.1:11:21488814:21511938:-1;gene:ENSCSAG00000007940.1;gene_biotype:protein_coding;transcript_biotype:protein_coding;description:lactate;dehydrogenase;B;[Source:NCBI;gene;(formerly;Entrezgene);Acc:103218738]
ENSCSAT00000015529.1	754	596.561	102.511	28	cdna;chromosome:ChlSab1.1:4:200926:214718:1;gene:ENSCSAG00000017437.1;gene_biotype:protein_coding;transcript_biotype:protein_coding;gene_symbol:PDCD6;description:programmed;cell;death;6;[Source:HGNC;Symbol;Acc:HGNC:8765]
ENSCSAT00000000196.1	3440	3282.51	102.466	154	cdna;chromosome:ChlSab1.1:6:43460747:43480112:1;gene:ENSCSAG00000002178.1;gene_biotype:protein_coding;transcript_biotype:protein_coding;gene_symbol:POLD1;description:transcription;factor;Spi-B;[Source:NCBI;gene;(formerly;Entrezgene);Acc:103235079]
ENSCSAT00000016596.1	1181	1023.51	102.427	48	cdna;chromosome:ChlSab1.1:20:9537525:9545299:-1;gene:ENSCSAG00000001933.1;gene_biotype:protein_coding;transcript_biotype:protein_coding;gene_symbol:HAX1;description:HCLS1;associated;protein;X-1;[Source:NCBI;gene;(formerly;Entrezgene);Acc:103223927]
ENSCSAT00000008629.1	2631	2473.51	102.426	116	cdna;chromosome:ChlSab1.1:6:4175108:4188649:-1;gene:ENSCSAG00000010549.1;gene_biotype:protein_coding;transcript_biotype:protein_coding;gene_symbol:UBXN6;description:UBX;domain;protein;6;[Source:NCBI;gene;(formerly;Entrezgene);Acc:103233702]
ENSCSAT00000001846.1	840	682.542	102.397	32	cdna;chromosome:ChlSab1.1:1:68834327:68853492:-1;gene:ENSCSAG00000003818.1;gene_biotype:protein_coding;transcript_biotype:protein_coding;gene_symbol:CLNS1A;description:chloride;nucleotide-sensitive;channel;1A;[Source:NCBI;gene;(formerly;Entrezgene);Acc:103248096]
ENSCSAT00000000568.1	3060	2902.51	102.337	136	cdna;chromosome:ChlSab1.1:16:68449898:68461190:1;gene:ENSCSAG00000002550.1;gene_biotype:protein_coding;transcript_biotype:protein_coding;gene_symbol:NFE2L1;description:nuclear;factor,;erythroid;2;like;1;[Source:NCBI;gene;(formerly;Entrezgene);Acc:103243593]
ENSCSAT00000018883.1	777	619.557	102.231	29	cdna;chromosome:ChlSab1.1:10:119921438:119922214:-1;gene:ENSCSAG00000018793.1;gene_biotype:protein_coding;transcript_biotype:protein_coding
ENSCSAT00000006135.1	3641	3483.51	102.197	163	cdna;chromosome:ChlSab1.1:10:105196505:105216525:-1;gene:ENSCSAG00000008084.1;gene_biotype:protein_coding;transcript_biotype:protein_coding;gene_symbol:PTPRN;description:protein;tyrosine;phosphatase;receptor;type;N;[Source:NCBI;gene;(formerly;Entrezgene);Acc:103217907]
ENSCSAT00000000767.1	1569	1411.51	102.123	66	cdna;chromosome:ChlSab1.1:20:1571266:1594953:-1;gene:ENSCSAG00000002742.1;gene_biotype:protein_coding;transcript_biotype:protein_coding;gene_symbol:UHMK1;description:U2AF;homology;motif;kinase;1;[Source:NCBI;gene;(formerly;Entrezgene);Acc:103223658]
ENSCSAT00000017673.1	992	834.515	102.07	39	cdna;chromosome:ChlSab1.1:20:115538026:115571142:1;gene:ENSCSAG00000000860.1;gene_biotype:protein_coding;transcript_biotype:protein_coding;gene_symbol:SDHB;description:succinate;dehydrogenase;complex;iron;sulfur;subunit;B;[Source:NCBI;gene;(formerly;Entrezgene);Acc:103225507]
ENSCSAT00000018219.1	864	706.541	102.01	33	cdna;chromosome:ChlSab1.1:X:91566712:91567575:-1;gene:ENSCSAG00000000316.1;gene_biotype:protein_coding;transcript_biotype:protein_coding;gene_symbol:MORF4L2;description:mortality;factor;4;like;2;[Source:NCBI;gene;(formerly;Entrezgene);Acc:103232416]
ENSCSAT00000011406.1	864	706.541	102.01	33	cdna;chromosome:ChlSab1.1:12:18214928:18244595:1;gene:ENSCSAG00000013314.1;gene_biotype:protein_coding;transcript_biotype:protein_coding;gene_symbol:STOM;description:stomatin;[Source:NCBI;gene;(formerly;Entrezgene);Acc:103218902]
ENSCSAT00000005202.1	1592	1434.51	102.009	67	cdna;chromosome:ChlSab1.1:5:19623410:19653479:1;gene:ENSCSAG00000007156.1;gene_biotype:protein_coding;transcript_biotype:protein_coding;gene_symbol:UQCRC2;description:ubiquinol-cytochrome;c;reductase;core;protein;II;[Source:NCBI;gene;(formerly;Entrezgene);Acc:103229564]
ENSCSAT00000008584.1	2963	2805.51	101.983	131	cdna;chromosome:ChlSab1.1:1:731645:818642:1;gene:ENSCSAG00000010503.1;gene_biotype:protein_coding;transcript_biotype:protein_coding;gene_symbol:AP2A2;description:adaptor;related;protein;complex;2;subunit;alpha;2;[Source:NCBI;gene;(formerly;Entrezgene);Acc:103235185]
ENSCSAT00000000501.1	1036	878.514	101.93	41	cdna;chromosome:ChlSab1.1:6:42810339:42815479:-1;gene:ENSCSAG00000002482.1;gene_biotype:protein_coding;transcript_biotype:protein_coding;gene_symbol:RRAS;description:RAS;related;[Source:NCBI;gene;(formerly;Entrezgene);Acc:103235048]
ENSCSAT00000001031.1	4036	3878.51	101.925	181	cdna;chromosome:ChlSab1.1:11:99490597:99560267:1;gene:ENSCSAG00000003004.1;gene_biotype:protein_coding;transcript_biotype:protein_coding;gene_symbol:TXNRD1;description:thioredoxin;reductase;1;[Source:NCBI;gene;(formerly;Entrezgene);Acc:103238986]
ENSCSAT00000004643.1	887	729.541	101.788	34	cdna;chromosome:ChlSab1.1:16:25327134:25334413:-1;gene:ENSCSAG00000006603.1;gene_biotype:protein_coding;transcript_biotype:protein_coding;gene_symbol:COPRS;description:coordinator;of;PRMT5;and;differentiation;stimulator;[Source:NCBI;gene;(formerly;Entrezgene);Acc:103242681]
ENSCSAT00000001498.1	1531	1373.51	101.769	64	cdna;chromosome:ChlSab1.1:6:36435578:36447633:-1;gene:ENSCSAG00000003471.1;gene_biotype:protein_coding;transcript_biotype:protein_coding;gene_symbol:GSK3A;description:glycogen;synthase;kinase;3;alpha;[Source:NCBI;gene;(formerly;Entrezgene);Acc:103234762]
ENSCSAT00000017991.1	165	42.991	101.607	2	cdna;chromosome:ChlSab1.1:16:39715158:39715322:1;gene:ENSCSAG00000000544.1;gene_biotype:protein_coding;transcript_biotype:protein_coding
ENSCSAT00000018424.1	234	85.996	101.59	4	cdna;chromosome:ChlSab1.1:X:56970221:56970454:-1;gene:ENSCSAG00000000111.1;gene_biotype:protein_coding;transcript_biotype:protein_coding
ENSCSAT00000014389.1	2501	2343.51	101.584	109	cdna;chromosome:ChlSab1.1:8:21079411:21097026:1;gene:ENSCSAG00000016294.1;gene_biotype:protein_coding;transcript_biotype:protein_coding;gene_symbol:RHOBTB2;description:Rho;related;BTB;domain;containing;2;[Source:NCBI;gene;(formerly;Entrezgene);Acc:103215466]
ENSCSAT00000013594.1	609	451.594	101.563	21	cdna;chromosome:ChlSab1.1:8:36063345:36092239:1;gene:ENSCSAG00000015504.1;gene_biotype:protein_coding;transcript_biotype:protein_coding;description:eukaryotic;translation;initiation;factor;4E;binding;protein;1;[Source:NCBI;gene;(formerly;Entrezgene);Acc:103215636]
ENSCSAT00000004987.1	1987	1829.51	101.473	85	cdna;chromosome:ChlSab1.1:16:23315439:23329469:-1;gene:ENSCSAG00000006944.1;gene_biotype:protein_coding;transcript_biotype:protein_coding;gene_symbol:GIT1;description:GIT;ArfGAP;1;[Source:HGNC;Symbol;Acc:HGNC:4272]
ENSCSAT00000012165.1	1492	1334.51	101.469	62	cdna;chromosome:ChlSab1.1:14:51916326:51954842:1;gene:ENSCSAG00000014078.1;gene_biotype:protein_coding;transcript_biotype:protein_coding;description:reticulon;4;[Source:NCBI;gene;(formerly;Entrezgene);Acc:103220251]
ENSCSAT00000013041.1	5540	5382.51	101.443	250	cdna;chromosome:ChlSab1.1:25:22629729:22681373:-1;gene:ENSCSAG00000014949.1;gene_biotype:protein_coding;transcript_biotype:protein_coding;gene_symbol:MAPKAPK2;description:MAPK;activated;protein;kinase;2;[Source:NCBI;gene;(formerly;Entrezgene);Acc:103230194]
ENSCSAT00000014696.1	2549	2391.51	101.372	111	cdna;chromosome:ChlSab1.1:27:25775160:25831860:1;gene:ENSCSAG00000016601.1;gene_biotype:protein_coding;transcript_biotype:protein_coding;gene_symbol:DHX15;description:DEAH-box;helicase;15;[Source:NCBI;gene;(formerly;Entrezgene);Acc:103246277]
ENSCSAT00000017416.1	1146	988.514	101.206	45.806	cdna;chromosome:ChlSab1.1:20:95052670:95054145:-1;gene:ENSCSAG00000001117.1;gene_biotype:protein_coding;transcript_biotype:protein_coding;gene_symbol:C1orf122;description:chromosome;20;open;reading;frame,;human;C1orf122;[Source:NCBI;gene;(formerly;Entrezgene);Acc:103225086]
ENSCSAT00000001481.1	4107	3949.51	101.199	183	cdna;chromosome:ChlSab1.1:16:62622663:62637127:1;gene:ENSCSAG00000003456.1;gene_biotype:protein_coding;transcript_biotype:protein_coding;gene_symbol:DUSP3;description:dual;specificity;phosphatase;3;[Source:NCBI;gene;(formerly;Entrezgene);Acc:103243352]
ENSCSAT00000000268.1	3224	3066.51	101.137	142	cdna;chromosome:ChlSab1.1:11:115893457:115930848:1;gene:ENSCSAG00000002250.1;gene_biotype:protein_coding;transcript_biotype:protein_coding;gene_symbol:RNF10;description:ring;finger;protein;10;[Source:HGNC;Symbol;Acc:HGNC:10055]
ENSCSAT00000010644.1	1995	1837.51	101.031	85	cdna;chromosome:ChlSab1.1:21:56865312:56886698:1;gene:ENSCSAG00000012548.1;gene_biotype:protein_coding;transcript_biotype:protein_coding;gene_symbol:CYP51A1;description:cytochrome;P450;family;51;subfamily;A;member;1;[Source:VGNC;Symbol;Acc:VGNC:83416]
ENSCSAT00000018760.1	936	778.518	100.995	36	cdna;chromosome:ChlSab1.1:2:43132058:43132993:-1;gene:ENSCSAG00000018670.1;gene_biotype:protein_coding;transcript_biotype:protein_coding;description:E3;ubiquitin-protein;ligase;RNF126;[Source:NCBI;gene;(formerly;Entrezgene);Acc:103214510]
ENSCSAT00000012935.1	958	800.518	100.948	37	cdna;chromosome:ChlSab1.1:23:18866758:18874975:-1;gene:ENSCSAG00000014844.1;gene_biotype:protein_coding;transcript_biotype:protein_coding;gene_symbol:TMED7;description:transmembrane;p24;trafficking;protein;7;[Source:NCBI;gene;(formerly;Entrezgene);Acc:103244366]
ENSCSAT00000000640.1	1522	1364.51	100.839	63	cdna;chromosome:ChlSab1.1:11:105962041:105986083:-1;gene:ENSCSAG00000002624.1;gene_biotype:protein_coding;transcript_biotype:protein_coding;gene_symbol:PPP1CC;description:protein;phosphatase;1;catalytic;subunit;gamma;[Source:HGNC;Symbol;Acc:HGNC:9283]
ENSCSAT00000013898.1	11085	10927.5	100.834	504.503	cdna;chromosome:ChlSab1.1:2:1872832:1929854:1;gene:ENSCSAG00000015940.1;gene_biotype:protein_coding;transcript_biotype:protein_coding;gene_symbol:LAMA5;description:laminin;subunit;alpha;5;[Source:NCBI;gene;(formerly;Entrezgene);Acc:103243076]
ENSCSAT00000000435.1	764	606.557	100.821	28	cdna;chromosome:ChlSab1.1:16:70180093:70183917:1;gene:ENSCSAG00000002418.1;gene_biotype:protein_coding;transcript_biotype:protein_coding;gene_symbol:SYNGR2;description:synaptogyrin;2;[Source:NCBI;gene;(formerly;Entrezgene);Acc:103243650]
ENSCSAT00000000125.1	1915	1757.51	100.659	81	cdna;chromosome:ChlSab1.1:16:74426105:74503373:1;gene:ENSCSAG00000002109.1;gene_biotype:protein_coding;transcript_biotype:protein_coding;gene_symbol:FOXK2;description:forkhead;box;K2;[Source:HGNC;Symbol;Acc:HGNC:6036]
ENSCSAT00000001229.1	1633	1475.51	100.654	68	cdna;chromosome:ChlSab1.1:1:94148087:94158097:-1;gene:ENSCSAG00000003203.1;gene_biotype:protein_coding;transcript_biotype:protein_coding;gene_symbol:MMP10;description:matrix;metallopeptidase;10;[Source:NCBI;gene;(formerly;Entrezgene);Acc:103248336]
ENSCSAT00000015696.1	1952	1794.51	100.644	82.692	cdna;chromosome:ChlSab1.1:18:62501879:62505937:1;gene:ENSCSAG00000017601.1;gene_biotype:protein_coding;transcript_biotype:protein_coding;gene_symbol:MYL12A;description:myosin;light;chain;12A;[Source:NCBI;gene;(formerly;Entrezgene);Acc:103222703]
ENSCSAT00000000445.1	1069	911.514	100.636	42	cdna;chromosome:ChlSab1.1:16:70096183:70102527:-1;gene:ENSCSAG00000002438.1;gene_biotype:protein_coding;transcript_biotype:protein_coding;gene_symbol:SLC35B1;description:solute;carrier;family;35;member;B1;[Source:HGNC;Symbol;Acc:HGNC:20798]
ENSCSAT00000018844.1	261	108.516	100.634	5	cdna;chromosome:ChlSab1.1:2:26234308:26234568:1;gene:ENSCSAG00000018754.1;gene_biotype:protein_coding;transcript_biotype:protein_coding;gene_symbol:BLCAP;description:BLCAP;apoptosis;inducing;factor;[Source:NCBI;gene;(formerly;Entrezgene);Acc:103246346]
ENSCSAT00000002668.1	615	457.594	100.232	21	cdna;chromosome:ChlSab1.1:5:52320532:52393532:-1;gene:ENSCSAG00000004637.1;gene_biotype:protein_coding;transcript_biotype:protein_coding;gene_symbol:CMTM4;description:CKLF;like;MARVEL;transmembrane;domain;containing;4;[Source:HGNC;Symbol;Acc:HGNC:19175]
ENSCSAT00000014129.1	375	217.906	100.23	10	cdna;chromosome:ChlSab1.1:12:1338388:1339753:-1;gene:ENSCSAG00000016037.1;gene_biotype:protein_coding;transcript_biotype:protein_coding;gene_symbol:PHPT1;description:phosphohistidine;phosphatase;1;[Source:NCBI;gene;(formerly;Entrezgene);Acc:103239603]
ENSCSAT00000003177.1	1703	1545.51	100.176	70.888	cdna;chromosome:ChlSab1.1:7:9609915:9611680:1;gene:ENSCSAG00000005140.1;gene_biotype:protein_coding;transcript_biotype:protein_coding
ENSCSAT00000005651.1	1603	1445.51	99.7214	66	cdna;chromosome:ChlSab1.1:1:9151712:9157456:1;gene:ENSCSAG00000007601.1;gene_biotype:protein_coding;transcript_biotype:protein_coding;gene_symbol:CDCA5;description:cell;division;cycle;associated;5;[Source:HGNC;Symbol;Acc:HGNC:14626]
ENSCSAT00000018459.1	465	307.692	99.716	14.048	cdna;chromosome:ChlSab1.1:X:69812022:69812486:1;gene:ENSCSAG00000000076.1;gene_biotype:protein_coding;transcript_biotype:protein_coding;description:histone;H3.3-like;[Source:NCBI;gene;(formerly;Entrezgene);Acc:103232262]
ENSCSAT00000013674.1	477	319.679	99.5102	14.565	cdna;chromosome:ChlSab1.1:13:62360427:62360904:-1;gene:ENSCSAG00000015582.1;gene_biotype:pseudogene;transcript_biotype:pseudogene
ENSCSAT00000009331.1	1433	1275.51	99.3138	58	cdna;chromosome:ChlSab1.1:11:3023014:3103560:1;gene:ENSCSAG00000011241.1;gene_biotype:protein_coding;transcript_biotype:protein_coding;gene_symbol:TEAD4;description:TEA;domain;transcription;factor;4;[Source:NCBI;gene;(formerly;Entrezgene);Acc:103218393]
ENSCSAT00000000520.1	1038	880.514	99.218	40	cdna;chromosome:ChlSab1.1:6:42694344:42704472:1;gene:ENSCSAG00000002513.1;gene_biotype:protein_coding;transcript_biotype:protein_coding;gene_symbol:FCGRT;description:Fc;fragment;of;IgG;receptor;and;transporter;[Source:HGNC;Symbol;Acc:HGNC:3621]
ENSCSAT00000002641.1	840	682.542	99.1971	31	cdna;chromosome:ChlSab1.1:5:52631354:52633856:-1;gene:ENSCSAG00000004606.1;gene_biotype:protein_coding;transcript_biotype:protein_coding;gene_symbol:CIAO2B;description:cytosolic;iron-sulfur;assembly;component;2B;[Source:NCBI;gene;(formerly;Entrezgene);Acc:103233137]
ENSCSAT00000007436.1	6611	6453.51	99.1604	293	cdna;chromosome:ChlSab1.1:21:103059991:103077341:-1;gene:ENSCSAG00000009365.1;gene_biotype:protein_coding;transcript_biotype:protein_coding;gene_symbol:AKR1B1;description:aldo-keto;reductase;family;1;member;B;[Source:HGNC;Symbol;Acc:HGNC:381]
ENSCSAT00000001834.1	1832	1674.51	99.1269	76	cdna;chromosome:ChlSab1.1:5:60258098:60264584:-1;gene:ENSCSAG00000003814.1;gene_biotype:protein_coding;transcript_biotype:protein_coding;gene_symbol:E2F4;description:E2F;transcription;factor;4;[Source:HGNC;Symbol;Acc:HGNC:3118]
ENSCSAT00000011341.1	819	661.545	99.0441	30	cdna;chromosome:ChlSab1.1:X:45653356:45660291:1;gene:ENSCSAG00000013263.1;gene_biotype:protein_coding;transcript_biotype:protein_coding;gene_symbol:EBP;description:EBP;cholestenol;delta-isomerase;[Source:NCBI;gene;(formerly;Entrezgene);Acc:103231927]
ENSCSAT00000002847.1	621	463.594	98.9345	21	cdna;chromosome:ChlSab1.1:11:53424868:53425576:-1;gene:ENSCSAG00000004816.1;gene_biotype:protein_coding;transcript_biotype:protein_coding;gene_symbol:DDIT3;description:DNA;damage;inducible;transcript;3;[Source:NCBI;gene;(formerly;Entrezgene);Acc:103238566]
ENSCSAT00000014647.1	378	220.885	98.8783	10	cdna;chromosome:ChlSab1.1:25:1229945:1234160:-1;gene:ENSCSAG00000016553.1;gene_biotype:protein_coding;transcript_biotype:protein_coding;gene_symbol:RNF187;description:ring;finger;protein;187;[Source:HGNC;Symbol;Acc:HGNC:27146]
ENSCSAT00000004928.1	3916	3758.51	98.7869	170	cdna;chromosome:ChlSab1.1:21:118513570:118518862:1;gene:ENSCSAG00000006882.1;gene_biotype:protein_coding;transcript_biotype:protein_coding;gene_symbol:REPIN1;description:replication;initiator;1;[Source:NCBI;gene;(formerly;Entrezgene);Acc:103227210]
ENSCSAT00000016350.1	622	464.594	98.7216	21	cdna;chromosome:ChlSab1.1:18:288789:294367:-1;gene:ENSCSAG00000018253.1;gene_biotype:protein_coding;transcript_biotype:protein_coding;gene_symbol:HSBP1L1;description:heat;shock;factor;binding;protein;1;like;1;[Source:NCBI;gene;(formerly;Entrezgene);Acc:103244014]
ENSCSAT00000011840.1	4296	4138.51	98.6879	187	cdna;chromosome:ChlSab1.1:12:10556650:10621589:1;gene:ENSCSAG00000013741.1;gene_biotype:protein_coding;transcript_biotype:protein_coding;gene_symbol:NIBAN2;description:niban;apoptosis;regulator;2;[Source:NCBI;gene;(formerly;Entrezgene);Acc:103239838]
ENSCSAT00000017406.1	3501	3343.51	98.6372	151	cdna;chromosome:ChlSab1.1:20:93487225:93490726:-1;gene:ENSCSAG00000001127.1;gene_biotype:pseudogene;transcript_biotype:pseudogene
ENSCSAT00000001906.1	711	553.573	98.6351	25	cdna;chromosome:ChlSab1.1:16:57590699:57592469:1;gene:ENSCSAG00000003881.1;gene_biotype:protein_coding;transcript_biotype:protein_coding;gene_symbol:LIMD2;description:LIM;domain;containing;2;[Source:NCBI;gene;(formerly;Entrezgene);Acc:103243223]
ENSCSAT00000003905.1	1244	1086.51	98.4981	49	cdna;chromosome:ChlSab1.1:19:23375723:23412742:-1;gene:ENSCSAG00000005882.1;gene_biotype:protein_coding;transcript_biotype:protein_coding;gene_symbol:ST13;description:ST13;Hsp70;interacting;protein;[Source:NCBI;gene;(formerly;Entrezgene);Acc:103223366]
ENSCSAT00000013153.1	2954	2796.51	98.4057	126	cdna;chromosome:ChlSab1.1:14:37297652:37344884:-1;gene:ENSCSAG00000015061.1;gene_biotype:protein_coding;transcript_biotype:protein_coding;gene_symbol:ANXA4;description:annexin;A4;[Source:NCBI;gene;(formerly;Entrezgene);Acc:103220106]
ENSCSAT00000008168.1	624	466.594	98.2984	21	cdna;chromosome:ChlSab1.1:25:72295301:72304170:-1;gene:ENSCSAG00000010083.1;gene_biotype:protein_coding;transcript_biotype:protein_coding
ENSCSAT00000017912.1	513	355.649	98.2574	16	cdna;chromosome:ChlSab1.1:1:65184519:65185031:-1;gene:ENSCSAG00000000623.1;gene_biotype:protein_coding;transcript_biotype:protein_coding
ENSCSAT00000016885.1	1714	1556.51	98.2227	70	cdna;chromosome:ChlSab1.1:6:49690818:49697126:1;gene:ENSCSAG00000001646.1;gene_biotype:protein_coding;transcript_biotype:protein_coding;description:zinc;finger;protein;460;[Source:NCBI;gene;(formerly;Entrezgene);Acc:103235387]
ENSCSAT00000006282.1	2629	2471.51	98.0904	111	cdna;chromosome:ChlSab1.1:21:109449321:109472121:1;gene:ENSCSAG00000008230.1;gene_biotype:protein_coding;transcript_biotype:protein_coding;gene_symbol:ADCK2;description:aarF;domain;containing;kinase;2;[Source:NCBI;gene;(formerly;Entrezgene);Acc:103227021]
ENSCSAT00000002328.1	625	467.594	98.0882	21	cdna;chromosome:ChlSab1.1:11:64240651:64286727:1;gene:ENSCSAG00000004306.1;gene_biotype:protein_coding;transcript_biotype:protein_coding;description:RAP1B,;member;of;RAS;oncogene;family;[Source:NCBI;gene;(formerly;Entrezgene);Acc:103238680]
ENSCSAT00000000446.1	6757	6599.51	97.9595	296	cdna;chromosome:ChlSab1.1:1:114054384:114218912:1;gene:ENSCSAG00000002428.1;gene_biotype:protein_coding;transcript_biotype:protein_coding;gene_symbol:UBASH3B;description:ubiquitin;associated;and;SH3;domain;containing;B;[Source:NCBI;gene;(formerly;Entrezgene);Acc:103248683]
ENSCSAT00000006335.1	1830	1672.51	97.9396	75	cdna;chromosome:ChlSab1.1:19:15300158:15323956:1;gene:ENSCSAG00000008283.1;gene_biotype:protein_coding;transcript_biotype:protein_coding;gene_symbol:FBXO7;description:F-box;protein;7;[Source:NCBI;gene;(formerly;Entrezgene);Acc:103223213]
ENSCSAT00000002838.1	1362	1204.51	97.9149	54	cdna;chromosome:ChlSab1.1:1:47599091:47618894:-1;gene:ENSCSAG00000004804.1;gene_biotype:protein_coding;transcript_biotype:protein_coding;gene_symbol:NCR3LG1;description:natural;killer;cell;cytotoxicity;receptor;3;ligand;1;[Source:HGNC;Symbol;Acc:HGNC:42400]
ENSCSAT00000002634.1	1296	1138.51	97.836	51	cdna;chromosome:ChlSab1.1:6:29534772:29552887:1;gene:ENSCSAG00000004605.1;gene_biotype:protein_coding;transcript_biotype:protein_coding;gene_symbol:WTIP;description:WT1;interacting;protein;[Source:HGNC;Symbol;Acc:HGNC:20964]
ENSCSAT00000002275.1	706	548.574	97.8335	24.573	cdna;chromosome:ChlSab1.1:1:62881941:62895529:1;gene:ENSCSAG00000004245.1;gene_biotype:protein_coding;transcript_biotype:protein_coding;gene_symbol:RHOG;description:ras;homolog;family;member;G;[Source:NCBI;gene;(formerly;Entrezgene);Acc:103247977]
ENSCSAT00000004166.1	2167	2009.51	97.8179	90	cdna;chromosome:ChlSab1.1:5:26791717:26798245:1;gene:ENSCSAG00000006124.1;gene_biotype:protein_coding;transcript_biotype:protein_coding
ENSCSAT00000011873.1	1118	960.514	97.7759	43	cdna;chromosome:ChlSab1.1:22:13589034:13598752:-1;gene:ENSCSAG00000013812.1;gene_biotype:protein_coding;transcript_biotype:protein_coding;gene_symbol:TWF2;description:twinfilin-2;[Source:NCBI;gene;(formerly;Entrezgene);Acc:103227720]
ENSCSAT00000005751.1	1230	1072.51	97.7474	48	cdna;chromosome:ChlSab1.1:11:26068735:26069967:-1;gene:ENSCSAG00000007706.1;gene_biotype:pseudogene;transcript_biotype:pseudogene
ENSCSAT00000009227.1	1878	1720.51	97.7461	77	cdna;chromosome:ChlSab1.1:6:3333885:3340138:1;gene:ENSCSAG00000011140.1;gene_biotype:protein_coding;transcript_biotype:protein_coding;gene_symbol:HMG20B;description:high;mobility;group;20B;[Source:NCBI;gene;(formerly;Entrezgene);Acc:103233684]
ENSCSAT00000004386.1	1722	1564.51	97.7204	70	cdna;chromosome:ChlSab1.1:5:26085918:26095309:-1;gene:ENSCSAG00000006364.1;gene_biotype:protein_coding;transcript_biotype:protein_coding;gene_symbol:SPNS1;description:sphingolipid;transporter;1;(putative);[Source:NCBI;gene;(formerly;Entrezgene);Acc:103230240]
ENSCSAT00000007969.1	5903	5745.51	97.6947	257	cdna;chromosome:ChlSab1.1:21:98456118:98574120:-1;gene:ENSCSAG00000009886.1;gene_biotype:protein_coding;transcript_biotype:protein_coding;gene_symbol:UBE2H;description:ubiquitin;conjugating;enzyme;E2;H;[Source:NCBI;gene;(formerly;Entrezgene);Acc:103226887]
ENSCSAT00000002705.1	1839	1681.51	97.4154	75	cdna;chromosome:ChlSab1.1:1:52310494:52470369:-1;gene:ENSCSAG00000004674.1;gene_biotype:protein_coding;transcript_biotype:protein_coding;gene_symbol:PARVA;description:parvin;alpha;[Source:HGNC;Symbol;Acc:HGNC:14652]
ENSCSAT00000001892.1	718	560.573	97.4034	25	cdna;chromosome:ChlSab1.1:6:33996843:34002405:1;gene:ENSCSAG00000003866.1;gene_biotype:protein_coding;transcript_biotype:protein_coding;gene_symbol:MED29;description:mediator;complex;subunit;29;[Source:NCBI;gene;(formerly;Entrezgene);Acc:103234668]
ENSCSAT00000002692.1	630	472.59	97.0513	21	cdna;chromosome:ChlSab1.1:5:52244909:52258567:1;gene:ENSCSAG00000004662.1;gene_biotype:protein_coding;transcript_biotype:protein_coding;gene_symbol:CKLF;description:chemokine-like;factor;[Source:NCBI;gene;(formerly;Entrezgene);Acc:103233123]
ENSCSAT00000013461.1	2589	2431.51	97.0094	108	cdna;chromosome:ChlSab1.1:14:33946108:33959285:-1;gene:ENSCSAG00000015370.1;gene_biotype:protein_coding;transcript_biotype:protein_coding;gene_symbol:SMYD5;description:SMYD;family;member;5;[Source:HGNC;Symbol;Acc:HGNC:16258]
ENSCSAT00000019150.1	450	292.703	97.0025	13	cdna;chromosome:ChlSab1.1:9:27910399:27910848:1;gene:ENSCSAG00000019060.1;gene_biotype:protein_coding;transcript_biotype:protein_coding
ENSCSAT00000007065.1	2702	2544.51	96.993	113	cdna;chromosome:ChlSab1.1:8:137799428:137813120:-1;gene:ENSCSAG00000008996.1;gene_biotype:protein_coding;transcript_biotype:protein_coding;gene_symbol:EEF1D;description:eukaryotic;translation;elongation;factor;1;delta;[Source:HGNC;Symbol;Acc:HGNC:3211]
ENSCSAT00000005249.1	2367	2209.51	96.8715	98	cdna;chromosome:ChlSab1.1:2:89811698:89846242:-1;gene:ENSCSAG00000007209.1;gene_biotype:protein_coding;transcript_biotype:protein_coding;gene_symbol:LSS;description:lanosterol;synthase;[Source:NCBI;gene;(formerly;Entrezgene);Acc:103220328]
ENSCSAT00000011772.1	6049	5891.51	96.8691	261.304	cdna;chromosome:ChlSab1.1:X:44385940:44405051:1;gene:ENSCSAG00000013679.1;gene_biotype:protein_coding;transcript_biotype:protein_coding;gene_symbol:UBA1;description:ubiquitin;like;modifier;activating;enzyme;1;[Source:NCBI;gene;(formerly;Entrezgene);Acc:103231883]
ENSCSAT00000013882.1	1984	1826.51	96.8565	81	cdna;chromosome:ChlSab1.1:27:45813496:45900778:-1;gene:ENSCSAG00000015789.1;gene_biotype:protein_coding;transcript_biotype:protein_coding;gene_symbol:ADD1;description:adducin;1;[Source:NCBI;gene;(formerly;Entrezgene);Acc:103246454]
ENSCSAT00000011459.1	834	676.542	96.8486	30	cdna;chromosome:ChlSab1.1:8:75453588:75525372:-1;gene:ENSCSAG00000013394.1;gene_biotype:protein_coding;transcript_biotype:protein_coding
ENSCSAT00000011649.1	3744	3586.51	96.8259	159	cdna;chromosome:ChlSab1.1:14:60027801:60044951:1;gene:ENSCSAG00000013552.1;gene_biotype:protein_coding;transcript_biotype:protein_coding;gene_symbol:CALM2;description:calmodulin;3;[Source:NCBI;gene;(formerly;Entrezgene);Acc:103234915]
ENSCSAT00000016559.1	654	496.585	96.7601	22	cdna;chromosome:ChlSab1.1:11:120352107:120384243:1;gene:ENSCSAG00000001969.1;gene_biotype:protein_coding;transcript_biotype:protein_coding;gene_symbol:BRI3BP;description:BRI3;binding;protein;[Source:HGNC;Symbol;Acc:HGNC:14251]
ENSCSAT00000008299.1	2686	2528.51	96.743	112	cdna;chromosome:ChlSab1.1:11:6885311:6898442:1;gene:ENSCSAG00000010215.1;gene_biotype:protein_coding;transcript_biotype:protein_coding;gene_symbol:USP5;description:ubiquitin;specific;peptidase;5;[Source:HGNC;Symbol;Acc:HGNC:12628]
ENSCSAT00000009768.1	8517	8359.51	96.6691	370	cdna;chromosome:ChlSab1.1:11:737590:890762:1;gene:ENSCSAG00000011929.1;gene_biotype:protein_coding;transcript_biotype:protein_coding;gene_symbol:WNK1;description:WNK;lysine;deficient;protein;kinase;1;[Source:HGNC;Symbol;Acc:HGNC:14540]
ENSCSAT00000017180.1	5469	5311.51	96.6406	235.023	cdna;chromosome:ChlSab1.1:20:67639280:67655900:-1;gene:ENSCSAG00000001353.1;gene_biotype:protein_coding;transcript_biotype:protein_coding;gene_symbol:LEPROT;description:leptin;receptor;overlapping;transcript;[Source:NCBI;gene;(formerly;Entrezgene);Acc:103224671]
ENSCSAT00000014292.1	2486	2328.51	96.6107	103	cdna;chromosome:ChlSab1.1:24:1077447:1087607:1;gene:ENSCSAG00000016199.1;gene_biotype:protein_coding;transcript_biotype:protein_coding;gene_symbol:PCK2;description:phosphoenolpyruvate;carboxykinase;2,;mitochondrial;[Source:NCBI;gene;(formerly;Entrezgene);Acc:103228704]
ENSCSAT00000012830.1	4702	4544.51	96.5996	201	cdna;chromosome:ChlSab1.1:14:41999064:42032288:-1;gene:ENSCSAG00000014735.1;gene_biotype:protein_coding;transcript_biotype:protein_coding;gene_symbol:SLC1A4;description:solute;carrier;family;1;member;4;[Source:NCBI;gene;(formerly;Entrezgene);Acc:103220154]
ENSCSAT00000011363.1	1356	1198.51	96.5828	53	cdna;chromosome:ChlSab1.1:21:47245170:47252730:1;gene:ENSCSAG00000013267.1;gene_biotype:protein_coding;transcript_biotype:protein_coding;gene_symbol:NDUFA4;description:NDUFA4;mitochondrial;complex;associated;[Source:NCBI;gene;(formerly;Entrezgene);Acc:103226480]
ENSCSAT00000007637.1	1720	1562.51	96.4477	69	cdna;chromosome:ChlSab1.1:23:75149710:75200192:1;gene:ENSCSAG00000009548.1;gene_biotype:protein_coding;transcript_biotype:protein_coding;gene_symbol:ATP6V0E1;description:ATPase;H+;transporting;V0;subunit;e1;[Source:NCBI;gene;(formerly;Entrezgene);Acc:103244984]
ENSCSAT00000006845.1	837	679.542	96.421	30	cdna;chromosome:ChlSab1.1:16:15316028:15326445:1;gene:ENSCSAG00000008795.1;gene_biotype:protein_coding;transcript_biotype:protein_coding;gene_symbol:CENPV;description:centromere;protein;V;[Source:NCBI;gene;(formerly;Entrezgene);Acc:103242449]
ENSCSAT00000005425.1	3221	3063.51	96.2456	135	cdna;chromosome:ChlSab1.1:1:9423917:9431104:1;gene:ENSCSAG00000007380.1;gene_biotype:protein_coding;transcript_biotype:protein_coding;gene_symbol:MEN1;description:menin;1;[Source:NCBI;gene;(formerly;Entrezgene);Acc:103233027]
ENSCSAT00000006271.1	1293	1135.51	96.1711	50	cdna;chromosome:ChlSab1.1:1:7844474:7847476:1;gene:ENSCSAG00000008217.1;gene_biotype:protein_coding;transcript_biotype:protein_coding;gene_symbol:MRPL11;description:mitochondrial;ribosomal;protein;L11;[Source:NCBI;gene;(formerly;Entrezgene);Acc:103222827]
ENSCSAT00000010326.1	998	840.515	96.1442	37	cdna;chromosome:ChlSab1.1:6:1044000:1047778:1;gene:ENSCSAG00000012236.1;gene_biotype:protein_coding;transcript_biotype:protein_coding;gene_symbol:FAM174C;description:family;with;sequence;similarity;174;member;C;[Source:NCBI;gene;(formerly;Entrezgene);Acc:103233601]
ENSCSAT00000017563.1	680	522.574	96.1274	23	cdna;chromosome:ChlSab1.1:20:106492327:106493685:-1;gene:ENSCSAG00000000970.1;gene_biotype:protein_coding;transcript_biotype:protein_coding;gene_symbol:SH3BGRL3;description:SH3;domain;binding;glutamate;rich;protein;like;3;[Source:HGNC;Symbol;Acc:HGNC:15568]
ENSCSAT00000003796.1	3634	3476.51	96.1148	152.992	cdna;chromosome:ChlSab1.1:10:127622149:127635833:1;gene:ENSCSAG00000005758.1;gene_biotype:protein_coding;transcript_biotype:protein_coding;gene_symbol:BOK;description:BCL2;family;apoptosis;regulator;BOK;[Source:NCBI;gene;(formerly;Entrezgene);Acc:103218244]
ENSCSAT00000001939.1	3952	3794.51	95.9923	166.773	cdna;chromosome:ChlSab1.1:6:33759462:33770497:1;gene:ENSCSAG00000003912.1;gene_biotype:protein_coding;transcript_biotype:protein_coding;gene_symbol:PAK4;description:p21;(RAC1);activated;kinase;4;[Source:HGNC;Symbol;Acc:HGNC:16059]
ENSCSAT00000014873.1	267	113.815	95.9479	5	cdna;chromosome:ChlSab1.1:22:4038402:4039845:1;gene:ENSCSAG00000016780.1;gene_biotype:protein_coding;transcript_biotype:protein_coding;description:SS18;like;2;[Source:NCBI;gene;(formerly;Entrezgene);Acc:103227461]
ENSCSAT00000008964.1	1548	1390.51	95.8123	61	cdna;chromosome:ChlSab1.1:23:54336113:54368674:1;gene:ENSCSAG00000010876.1;gene_biotype:protein_coding;transcript_biotype:protein_coding;gene_symbol:G3BP1;description:G3BP;stress;granule;assembly;factor;1;[Source:NCBI;gene;(formerly;Entrezgene);Acc:103244817]
ENSCSAT00000003399.1	1984	1826.51	95.6608	80	cdna;chromosome:ChlSab1.1:6:16782746:16800143:-1;gene:ENSCSAG00000005370.1;gene_biotype:protein_coding;transcript_biotype:protein_coding;gene_symbol:LSM4;description:LSM4;homolog,;U6;small;nuclear;RNA;and;mRNA;degradation;associated;[Source:NCBI;gene;(formerly;Entrezgene);Acc:103234177]
ENSCSAT00000019344.1	171	45.682	95.6208	2	cdna;chromosome:ChlSab1.1:11:46348669:46348839:1;gene:ENSCSAG00000019254.1;gene_biotype:protein_coding;transcript_biotype:protein_coding;gene_symbol:COX14;description:cytochrome;c;oxidase;assembly;protein;COX14;[Source:NCBI;gene;(formerly;Entrezgene);Acc:103238297]
ENSCSAT00000009169.1	500	342.662	95.6076	15	cdna;chromosome:ChlSab1.1:12:40194301:40202441:-1;gene:ENSCSAG00000011083.1;gene_biotype:protein_coding;transcript_biotype:protein_coding;gene_symbol:SEC61B;description:SEC61;translocon;subunit;beta;[Source:NCBI;gene;(formerly;Entrezgene);Acc:103219137]
ENSCSAT00000017398.1	3173	3015.51	95.6047	132	cdna;chromosome:ChlSab1.1:20:93161877:93177839:-1;gene:ENSCSAG00000001135.1;gene_biotype:protein_coding;transcript_biotype:protein_coding;gene_symbol:PABPC4;description:poly(A);binding;protein;cytoplasmic;4;[Source:NCBI;gene;(formerly;Entrezgene);Acc:103225052]
ENSCSAT00000009458.1	1713	1555.51	95.4777	68	cdna;chromosome:ChlSab1.1:5:1691565:1697562:1;gene:ENSCSAG00000011369.1;gene_biotype:protein_coding;transcript_biotype:protein_coding;gene_symbol:NUBP2;description:nucleotide;binding;protein;2;[Source:NCBI;gene;(formerly;Entrezgene);Acc:103226273]
ENSCSAT00000000552.1	1554	1396.51	95.4007	61	cdna;chromosome:ChlSab1.1:11:107019111:107060374:1;gene:ENSCSAG00000002555.1;gene_biotype:protein_coding;transcript_biotype:protein_coding;description:aldehyde;dehydrogenase;2;family;member;[Source:NCBI;gene;(formerly;Entrezgene);Acc:103239134]
ENSCSAT00000018819.1	501	343.661	95.3297	15	cdna;chromosome:ChlSab1.1:22:88867675:88868175:1;gene:ENSCSAG00000018729.1;gene_biotype:protein_coding;transcript_biotype:protein_coding;gene_symbol:CGGBP1;description:CGG;triplet;repeat;binding;protein;1;[Source:NCBI;gene;(formerly;Entrezgene);Acc:103228533]
ENSCSAT00000001098.1	708	550.574	95.2056	24	cdna;chromosome:ChlSab1.1:16:64238347:64242521:-1;gene:ENSCSAG00000003069.1;gene_biotype:protein_coding;transcript_biotype:protein_coding;gene_symbol:NKIRAS2;description:NFKB;inhibitor;interacting;Ras;like;2;[Source:NCBI;gene;(formerly;Entrezgene);Acc:103243425]
ENSCSAT00000007396.1	2179	2021.51	95.0764	88	cdna;chromosome:ChlSab1.1:9:52109272:52117483:-1;gene:ENSCSAG00000009321.1;gene_biotype:protein_coding;transcript_biotype:protein_coding;gene_symbol:PPIF;description:peptidylprolyl;isomerase;F;[Source:HGNC;Symbol;Acc:HGNC:9259]
ENSCSAT00000018818.1	939	781.518	95.0182	34	cdna;chromosome:ChlSab1.1:22:85770613:85771551:1;gene:ENSCSAG00000018728.1;gene_biotype:protein_coding;transcript_biotype:protein_coding
ENSCSAT00000000315.1	2228	2070.51	94.9361	90	cdna;chromosome:ChlSab1.1:1:116734393:116762231:1;gene:ENSCSAG00000002298.1;gene_biotype:protein_coding;transcript_biotype:protein_coding;gene_symbol:STT3A;description:STT3;oligosaccharyltransferase;complex;catalytic;subunit;A;[Source:NCBI;gene;(formerly;Entrezgene);Acc:103248767]
ENSCSAT00000016750.1	664	506.574	94.8521	22	cdna;chromosome:ChlSab1.1:20:12819956:12821629:1;gene:ENSCSAG00000001779.1;gene_biotype:protein_coding;transcript_biotype:protein_coding;gene_symbol:RBM8A;description:RNA;binding;motif;protein;8A;[Source:NCBI;gene;(formerly;Entrezgene);Acc:103224058]
ENSCSAT00000015638.1	1401	1243.51	94.844	54	cdna;chromosome:ChlSab1.1:18:69389606:69436191:-1;gene:ENSCSAG00000017542.1;gene_biotype:protein_coding;transcript_biotype:protein_coding;gene_symbol:IMPA2;description:inositol;monophosphatase;2;[Source:NCBI;gene;(formerly;Entrezgene);Acc:103222779]
ENSCSAT00000009582.1	2186	2028.51	94.7483	88	cdna;chromosome:ChlSab1.1:6:2534376:2548604:-1;gene:ENSCSAG00000011493.1;gene_biotype:protein_coding;transcript_biotype:protein_coding;gene_symbol:SGTA;description:small;glutamine;rich;tetratricopeptide;repeat;containing;alpha;[Source:NCBI;gene;(formerly;Entrezgene);Acc:103233657]
ENSCSAT00000009325.1	3800	3642.51	94.7377	158	cdna;chromosome:ChlSab1.1:6:2858937:2887704:1;gene:ENSCSAG00000011235.1;gene_biotype:protein_coding;transcript_biotype:protein_coding;gene_symbol:GNA11;description:G;protein;subunit;alpha;11;[Source:HGNC;Symbol;Acc:HGNC:4379]
ENSCSAT00000011163.1	757	599.558	94.7128	26	cdna;chromosome:ChlSab1.1:24:46624143:46642165:-1;gene:ENSCSAG00000013066.1;gene_biotype:protein_coding;transcript_biotype:protein_coding;gene_symbol:ERH;description:ERH;mRNA;splicing;and;mitosis;factor;[Source:NCBI;gene;(formerly;Entrezgene);Acc:103229246]
ENSCSAT00000014122.1	942	784.518	94.6549	34	cdna;chromosome:ChlSab1.1:29:23693549:23697023:1;gene:ENSCSAG00000016036.1;gene_biotype:protein_coding;transcript_biotype:protein_coding;gene_symbol:PABPN1;description:poly(A);binding;protein;nuclear;1;[Source:NCBI;gene;(formerly;Entrezgene);Acc:103231469]
ENSCSAT00000001578.1	1981	1823.51	94.6204	79	cdna;chromosome:ChlSab1.1:7:85154068:85225144:-1;gene:ENSCSAG00000003547.1;gene_biotype:protein_coding;transcript_biotype:protein_coding;gene_symbol:SLC7A11;description:solute;carrier;family;7;member;11;[Source:NCBI;gene;(formerly;Entrezgene);Acc:103236270]
ENSCSAT00000007336.1	7731	7573.51	94.5896	328	cdna;chromosome:ChlSab1.1:9:53513979:53648839:1;gene:ENSCSAG00000009267.1;gene_biotype:protein_coding;transcript_biotype:protein_coding;gene_symbol:DLG5;description:discs;large;MAGUK;scaffold;protein;5;[Source:NCBI;gene;(formerly;Entrezgene);Acc:103215946]
ENSCSAT00000016362.1	2354	2196.51	94.4619	95	cdna;chromosome:ChlSab1.1:28:8215318:8250523:-1;gene:ENSCSAG00000018265.1;gene_biotype:protein_coding;transcript_biotype:protein_coding;gene_symbol:RCC1L;description:RCC1;like;[Source:NCBI;gene;(formerly;Entrezgene);Acc:103246612]
ENSCSAT00000003261.1	4736	4578.51	94.4512	198	cdna;chromosome:ChlSab1.1:11:52068884:52085726:1;gene:ENSCSAG00000005229.1;gene_biotype:protein_coding;transcript_biotype:protein_coding;gene_symbol:ESYT1;description:extended;synaptotagmin;1;[Source:NCBI;gene;(formerly;Entrezgene);Acc:103238507]
ENSCSAT00000000793.1	1777	1619.51	94.4018	70	cdna;chromosome:ChlSab1.1:6:42186238:42194115:1;gene:ENSCSAG00000002776.1;gene_biotype:protein_coding;transcript_biotype:protein_coding;gene_symbol:BAX;description:BCL2;associated;X,;apoptosis;regulator;[Source:HGNC;Symbol;Acc:HGNC:959]
ENSCSAT00000013813.1	2356	2198.51	94.3759	95	cdna;chromosome:ChlSab1.1:21:13570127:13581612:1;gene:ENSCSAG00000015722.1;gene_biotype:protein_coding;transcript_biotype:protein_coding;gene_symbol:TBRG4;description:transforming;growth;factor;beta;regulator;4;[Source:NCBI;gene;(formerly;Entrezgene);Acc:103226119]
ENSCSAT00000005300.1	3977	3819.51	94.3502	165	cdna;chromosome:ChlSab1.1:1:9456971:9472396:1;gene:ENSCSAG00000007258.1;gene_biotype:protein_coding;transcript_biotype:protein_coding;gene_symbol:SF1;description:splicing;factor;1;[Source:NCBI;gene;(formerly;Entrezgene);Acc:103233054]
ENSCSAT00000017358.1	3170	3012.51	94.2499	130	cdna;chromosome:ChlSab1.1:20:90002030:90008033:1;gene:ENSCSAG00000001175.1;gene_biotype:protein_coding;transcript_biotype:protein_coding;gene_symbol:SLC2A1;description:solute;carrier;family;2;member;1;[Source:HGNC;Symbol;Acc:HGNC:11005]
ENSCSAT00000002259.1	1826	1668.51	94.2474	72	cdna;chromosome:ChlSab1.1:11:64859718:64882269:1;gene:ENSCSAG00000004232.1;gene_biotype:protein_coding;transcript_biotype:protein_coding;gene_symbol:CPSF6;description:cleavage;and;polyadenylation;specific;factor;6;[Source:NCBI;gene;(formerly;Entrezgene);Acc:103238693]
ENSCSAT00000008166.1	1896	1738.51	94.2215	75	cdna;chromosome:ChlSab1.1:21:97189481:97206726:-1;gene:ENSCSAG00000010128.1;gene_biotype:protein_coding;transcript_biotype:protein_coding;gene_symbol:IMPDH1;description:inosine;monophosphate;dehydrogenase;1;[Source:HGNC;Symbol;Acc:HGNC:6052]
ENSCSAT00000017436.1	3426	3268.51	94.2184	141	cdna;chromosome:ChlSab1.1:20:96671530:96697742:-1;gene:ENSCSAG00000001097.1;gene_biotype:protein_coding;transcript_biotype:protein_coding;gene_symbol:MAP7D1;description:MAP7;domain;containing;1;[Source:HGNC;Symbol;Acc:HGNC:25514]
ENSCSAT00000009594.1	4771	4613.51	94.2081	199	cdna;chromosome:ChlSab1.1:15:41052614:41193268:1;gene:ENSCSAG00000011508.1;gene_biotype:protein_coding;transcript_biotype:protein_coding;gene_symbol:WWTR1;description:WW;domain;containing;transcription;regulator;1;[Source:NCBI;gene;(formerly;Entrezgene);Acc:103241495]
ENSCSAT00000009501.1	6095	5937.51	94.1677	256	cdna;chromosome:ChlSab1.1:23:53220796:53262103:1;gene:ENSCSAG00000011415.1;gene_biotype:protein_coding;transcript_biotype:protein_coding;gene_symbol:SYNPO;description:synaptopodin;[Source:HGNC;Symbol;Acc:HGNC:30672]
ENSCSAT00000009518.1	1805	1647.51	94.1231	71	cdna;chromosome:ChlSab1.1:10:83003717:83017363:-1;gene:ENSCSAG00000011463.1;gene_biotype:protein_coding;transcript_biotype:protein_coding;gene_symbol:HSPD1;description:heat;shock;protein;family;D;(Hsp60);member;1;[Source:HGNC;Symbol;Acc:HGNC:5261]
ENSCSAT00000006487.1	2084	1926.51	94.0963	83	cdna;chromosome:ChlSab1.1:8:138634752:138639460:-1;gene:ENSCSAG00000008433.1;gene_biotype:protein_coding;transcript_biotype:protein_coding;gene_symbol:VPS28;description:VPS28;subunit;of;ESCRT-I;[Source:HGNC;Symbol;Acc:HGNC:18178]
ENSCSAT00000015386.1	552	394.626	94.0871	17	cdna;chromosome:ChlSab1.1:14:1175082:1187796:-1;gene:ENSCSAG00000017294.1;gene_biotype:protein_coding;transcript_biotype:protein_coding;gene_symbol:ANKRD39;description:ankyrin;repeat;domain;39;[Source:NCBI;gene;(formerly;Entrezgene);Acc:103241085]
ENSCSAT00000018515.1	645	487.585	94.0667	21	cdna;chromosome:ChlSab1.1:9:48155911:48156555:1;gene:ENSCSAG00000018425.1;gene_biotype:protein_coding;transcript_biotype:protein_coding
ENSCSAT00000005753.1	2201	2043.51	94.0528	88	cdna;chromosome:ChlSab1.1:12:89223526:89256022:1;gene:ENSCSAG00000007705.1;gene_biotype:protein_coding;transcript_biotype:protein_coding;description:phosphoserine;aminotransferase;1;[Source:NCBI;gene;(formerly;Entrezgene);Acc:103219627]
ENSCSAT00000017652.1	2178	2020.51	94.0425	87	cdna;chromosome:ChlSab1.1:20:112893633:112897355:-1;gene:ENSCSAG00000000881.1;gene_biotype:protein_coding;transcript_biotype:protein_coding;gene_symbol:NBL1;description:NBL1,;DAN;family;BMP;antagonist;[Source:NCBI;gene;(formerly;Entrezgene);Acc:103225473]
ENSCSAT00000010252.1	506	348.654	93.9644	15	cdna;chromosome:ChlSab1.1:8:95001587:95004346:1;gene:ENSCSAG00000012163.1;gene_biotype:protein_coding;transcript_biotype:protein_coding;description:RNA;polymerase;II,;I;and;III;subunit;K;[Source:NCBI;gene;(formerly;Entrezgene);Acc:103237210]
ENSCSAT00000012050.1	4554	4396.51	93.8902	189	cdna;chromosome:ChlSab1.1:26:10176215:10427675:-1;gene:ENSCSAG00000013957.1;gene_biotype:protein_coding;transcript_biotype:protein_coding;gene_symbol:NEO1;description:neogenin;1;[Source:NCBI;gene;(formerly;Entrezgene);Acc:103245360]
ENSCSAT00000001803.1	1414	1256.51	93.8628	54	cdna;chromosome:ChlSab1.1:6:34486338:34495251:1;gene:ENSCSAG00000003774.1;gene_biotype:protein_coding;transcript_biotype:protein_coding;gene_symbol:PSMC4;description:proteasome;26S;subunit,;ATPase;4;[Source:NCBI;gene;(formerly;Entrezgene);Acc:103234690]
ENSCSAT00000000591.1	1997	1839.51	93.7974	79	cdna;chromosome:ChlSab1.1:16:68223846:68231989:-1;gene:ENSCSAG00000002576.1;gene_biotype:protein_coding;transcript_biotype:protein_coding;gene_symbol:MRPL10;description:mitochondrial;ribosomal;protein;L10;[Source:NCBI;gene;(formerly;Entrezgene);Acc:103243584]
ENSCSAT00000005465.1	4606	4448.51	93.7746	191	cdna;chromosome:ChlSab1.1:17:64250359:64281195:1;gene:ENSCSAG00000007421.1;gene_biotype:protein_coding;transcript_biotype:protein_coding;gene_symbol:TXNDC5;description:thioredoxin;domain;containing;5;[Source:HGNC;Symbol;Acc:HGNC:21073]
ENSCSAT00000013311.1	903	745.527	93.7461	32	cdna;chromosome:ChlSab1.1:12:4780568:4785385:1;gene:ENSCSAG00000015225.1;gene_biotype:protein_coding;transcript_biotype:protein_coding;gene_symbol:SURF1;description:SURF1;cytochrome;c;oxidase;assembly;factor;[Source:HGNC;Symbol;Acc:HGNC:11474]
ENSCSAT00000015651.1	2842	2684.51	93.5619	115	cdna;chromosome:ChlSab1.1:18:68418292:68488176:-1;gene:ENSCSAG00000017556.1;gene_biotype:protein_coding;transcript_biotype:protein_coding;gene_symbol:PPP4R1;description:protein;phosphatase;4;regulatory;subunit;1;[Source:NCBI;gene;(formerly;Entrezgene);Acc:103222759]
ENSCSAT00000013716.1	1559	1401.51	93.5019	60	cdna;chromosome:ChlSab1.1:12:2665620:2669407:-1;gene:ENSCSAG00000015621.1;gene_biotype:protein_coding;transcript_biotype:protein_coding;gene_symbol:MRPS2;description:mitochondrial;ribosomal;protein;S2;[Source:NCBI;gene;(formerly;Entrezgene);Acc:103239652]
ENSCSAT00000004028.1	3288	3130.51	93.488	134	cdna;chromosome:ChlSab1.1:11:46314404:46328725:1;gene:ENSCSAG00000005990.1;gene_biotype:protein_coding;transcript_biotype:protein_coding;gene_symbol:SMARCD1;description:SWI/SNF;related,;matrix;associated,;actin;dependent;regulator;of;chromatin,;subfamily;d,;member;1;[Source:HGNC;Symbol;Acc:HGNC:11106]
ENSCSAT00000005048.1	3572	3414.51	93.3879	146	cdna;chromosome:ChlSab1.1:22:61635092:61669553:-1;gene:ENSCSAG00000007007.1;gene_biotype:protein_coding;transcript_biotype:protein_coding;gene_symbol:UPK1B;description:uroplakin;1B;[Source:NCBI;gene;(formerly;Entrezgene);Acc:103228235]
ENSCSAT00000008370.1	1281	1123.51	93.3103	48	cdna;chromosome:ChlSab1.1:25:68625260:68682804:-1;gene:ENSCSAG00000010297.1;gene_biotype:protein_coding;transcript_biotype:protein_coding;gene_symbol:EGLN1;description:egl-9;family;hypoxia;inducible;factor;1;[Source:NCBI;gene;(formerly;Entrezgene);Acc:103230756]
ENSCSAT00000009369.1	930	772.518	93.298	33	cdna;chromosome:ChlSab1.1:5:1713542:1730797:-1;gene:ENSCSAG00000011337.1;gene_biotype:protein_coding;transcript_biotype:protein_coding;gene_symbol:HAGH;description:hydroxyacylglutathione;hydrolase;[Source:NCBI;gene;(formerly;Entrezgene);Acc:103226359]
ENSCSAT00000006747.1	1375	1217.51	93.2817	52	cdna;chromosome:ChlSab1.1:2:80096955:80102721:1;gene:ENSCSAG00000008686.1;gene_biotype:protein_coding;transcript_biotype:protein_coding;gene_symbol:CBR1;description:carbonyl;reductase;1;[Source:HGNC;Symbol;Acc:HGNC:1548]
ENSCSAT00000007709.1	2173	2015.51	93.1922	86	cdna;chromosome:ChlSab1.1:22:48561161:48618020:-1;gene:ENSCSAG00000009721.1;gene_biotype:protein_coding;transcript_biotype:protein_coding;gene_symbol:RAF1;description:Raf-1;proto-oncogene,;serine/threonine;kinase;[Source:NCBI;gene;(formerly;Entrezgene);Acc:103228031]
ENSCSAT00000000913.1	462	304.697	93.1843	13	cdna;chromosome:ChlSab1.1:5:74243405:74247598:1;gene:ENSCSAG00000002885.1;gene_biotype:protein_coding;transcript_biotype:protein_coding;description:trafficking;protein;particle;complex;2;like;[Source:NCBI;gene;(formerly;Entrezgene);Acc:103233459]
ENSCSAT00000002516.1	3228	3070.51	93.1809	131	cdna;chromosome:ChlSab1.1:1:55362694:55422427:-1;gene:ENSCSAG00000004504.1;gene_biotype:protein_coding;transcript_biotype:protein_coding;gene_symbol:IPO7;description:importin;7;[Source:NCBI;gene;(formerly;Entrezgene);Acc:103240505]
ENSCSAT00000009386.1	486	328.671	93.0321	14	cdna;chromosome:ChlSab1.1:17:30247752:30255127:1;gene:ENSCSAG00000011299.1;gene_biotype:protein_coding;transcript_biotype:protein_coding;gene_symbol:MED20;description:mediator;complex;subunit;20;[Source:HGNC;Symbol;Acc:HGNC:16840]
ENSCSAT00000004523.1	2200	2042.51	93.0296	87	cdna;chromosome:ChlSab1.1:19:21403341:21419663:-1;gene:ENSCSAG00000006487.1;gene_biotype:protein_coding;transcript_biotype:protein_coding;gene_symbol:SUN2;description:Sad1;and;UNC84;domain;containing;2;[Source:NCBI;gene;(formerly;Entrezgene);Acc:103223326]
ENSCSAT00000001680.1	815	657.545	93.0035	28	cdna;chromosome:ChlSab1.1:1:77559548:77612434:1;gene:ENSCSAG00000003649.1;gene_biotype:protein_coding;transcript_biotype:protein_coding;gene_symbol:HIKESHI;description:heat;shock;protein;nuclear;import;factor;hikeshi;[Source:NCBI;gene;(formerly;Entrezgene);Acc:103248170]
ENSCSAT00000019617.1	2085	1927.51	92.9144	82	cdna;chromosome:ChlSab1.1:X:605953:608037:-1;gene:ENSCSAG00000019527.1;gene_biotype:protein_coding;transcript_biotype:protein_coding;gene_symbol:ZBED1;description:zinc;finger;BED-type;containing;1;[Source:NCBI;gene;(formerly;Entrezgene);Acc:103231530]
ENSCSAT00000011171.1	3594	3436.51	92.7901	146	cdna;chromosome:ChlSab1.1:5:198575:211845:1;gene:ENSCSAG00000013077.1;gene_biotype:protein_coding;transcript_biotype:protein_coding;gene_symbol:FAM234A;description:family;with;sequence;similarity;234;member;A;[Source:NCBI;gene;(formerly;Entrezgene);Acc:103225251]
ENSCSAT00000010237.1	1476	1318.51	92.762	56	cdna;chromosome:ChlSab1.1:6:1152540:1164175:1;gene:ENSCSAG00000012149.1;gene_biotype:protein_coding;transcript_biotype:protein_coding;gene_symbol:NDUFS7;description:NADH:ubiquinone;oxidoreductase;core;subunit;S7;[Source:NCBI;gene;(formerly;Entrezgene);Acc:103233605]
ENSCSAT00000007364.1	1641	1483.51	92.7504	63	cdna;chromosome:ChlSab1.1:17:39855010:39863710:1;gene:ENSCSAG00000009289.1;gene_biotype:protein_coding;transcript_biotype:protein_coding;gene_symbol:AGPAT1;description:1-acylglycerol-3-phosphate;O-acyltransferase;1;[Source:HGNC;Symbol;Acc:HGNC:324]
ENSCSAT00000011535.1	1594	1436.51	92.7442	61	cdna;chromosome:ChlSab1.1:9:7836845:7854078:1;gene:ENSCSAG00000013445.1;gene_biotype:protein_coding;transcript_biotype:protein_coding;gene_symbol:ATP5F1C;description:ATP;synthase;F1;subunit;gamma;[Source:NCBI;gene;(formerly;Entrezgene);Acc:103237855]
ENSCSAT00000010000.1	4992	4834.51	92.6121	205	cdna;chromosome:ChlSab1.1:21:67974317:68154439:1;gene:ENSCSAG00000011909.1;gene_biotype:protein_coding;transcript_biotype:protein_coding;gene_symbol:SEMA3C;description:semaphorin;3C;[Source:NCBI;gene;(formerly;Entrezgene);Acc:103226646]
ENSCSAT00000015053.1	297	141.524	92.5949	6	cdna;chromosome:ChlSab1.1:27:10717204:10754174:1;gene:ENSCSAG00000016958.1;gene_biotype:protein_coding;transcript_biotype:protein_coding;gene_symbol:SMIM14;description:small;integral;membrane;protein;14;[Source:NCBI;gene;(formerly;Entrezgene);Acc:103246198]
ENSCSAT00000004277.1	3908	3750.51	92.5919	159	cdna;chromosome:ChlSab1.1:11:45071611:45092646:-1;gene:ENSCSAG00000006240.1;gene_biotype:protein_coding;transcript_biotype:protein_coding;gene_symbol:DDX23;description:DEAD-box;helicase;23;[Source:NCBI;gene;(formerly;Entrezgene);Acc:103238244]
ENSCSAT00000000463.1	3766	3608.51	92.5917	152.98	cdna;chromosome:ChlSab1.1:6:42953693:42969427:1;gene:ENSCSAG00000002446.1;gene_biotype:protein_coding;transcript_biotype:protein_coding;gene_symbol:AP2A1;description:adaptor;related;protein;complex;2;subunit;alpha;1;[Source:HGNC;Symbol;Acc:HGNC:561]
ENSCSAT00000002817.1	1290	1132.51	92.5688	48	cdna;chromosome:ChlSab1.1:9:111488333:111551500:-1;gene:ENSCSAG00000004782.1;gene_biotype:protein_coding;transcript_biotype:protein_coding;gene_symbol:CACUL1;description:CDK2;associated;cullin;domain;1;[Source:NCBI;gene;(formerly;Entrezgene);Acc:103216597]
ENSCSAT00000012650.1	960	802.518	92.5318	34	cdna;chromosome:ChlSab1.1:2:18027016:18043823:1;gene:ENSCSAG00000014557.1;gene_biotype:protein_coding;transcript_biotype:protein_coding;gene_symbol:ACOT8;description:acyl-CoA;thioesterase;8;[Source:NCBI;gene;(formerly;Entrezgene);Acc:103245242]
ENSCSAT00000013856.1	724	566.57	92.5176	24	cdna;chromosome:ChlSab1.1:22:9873019:9905308:-1;gene:ENSCSAG00000015759.1;gene_biotype:protein_coding;transcript_biotype:protein_coding;gene_symbol:SHISA5;description:shisa;family;member;5;[Source:HGNC;Symbol;Acc:HGNC:30376]
ENSCSAT00000014981.1	4479	4321.51	92.3486	182.726	cdna;chromosome:ChlSab1.1:10:1918154:1971610:1;gene:ENSCSAG00000016886.1;gene_biotype:protein_coding;transcript_biotype:protein_coding;gene_symbol:HS6ST1;description:heparan;sulfate;6-O-sulfotransferase;1;[Source:NCBI;gene;(formerly;Entrezgene);Acc:103216864]
ENSCSAT00000004129.1	2030	1872.51	92.1444	79	cdna;chromosome:ChlSab1.1:16:30728070:30838704:-1;gene:ENSCSAG00000006066.1;gene_biotype:protein_coding;transcript_biotype:protein_coding;gene_symbol:AATF;description:apoptosis;antagonizing;transcription;factor;[Source:NCBI;gene;(formerly;Entrezgene);Acc:103242794]
ENSCSAT00000002185.1	5448	5290.51	92.0606	223	cdna;chromosome:ChlSab1.1:1:63444713:63459776:1;gene:ENSCSAG00000004156.1;gene_biotype:protein_coding;transcript_biotype:protein_coding;gene_symbol:INPPL1;description:inositol;polyphosphate;phosphatase;like;1;[Source:NCBI;gene;(formerly;Entrezgene);Acc:103247996]
ENSCSAT00000010019.1	2269	2111.51	92.0583	89	cdna;chromosome:ChlSab1.1:16:6593287:6598979:1;gene:ENSCSAG00000012021.1;gene_biotype:protein_coding;transcript_biotype:protein_coding;gene_symbol:ACADVL;description:acyl-CoA;dehydrogenase;very;long;chain;[Source:NCBI;gene;(formerly;Entrezgene);Acc:103242278]
ENSCSAT00000000126.1	2269	2111.51	92.0582	89	cdna;chromosome:ChlSab1.1:1:125360454:125400409:1;gene:ENSCSAG00000002114.1;gene_biotype:protein_coding;transcript_biotype:protein_coding;gene_symbol:GLB1L3;description:galactosidase;beta;1;like;3;[Source:NCBI;gene;(formerly;Entrezgene);Acc:103248897]
ENSCSAT00000011369.1	1842	1684.51	92.0557	71	cdna;chromosome:ChlSab1.1:26:16320933:16446527:-1;gene:ENSCSAG00000013275.1;gene_biotype:protein_coding;transcript_biotype:protein_coding;gene_symbol:SMAD3;description:SMAD;family;member;3;[Source:NCBI;gene;(formerly;Entrezgene);Acc:103245436]
ENSCSAT00000016257.1	1418	1260.51	91.8322	53	cdna;chromosome:ChlSab1.1:28:9737777:9743189:1;gene:ENSCSAG00000018161.1;gene_biotype:protein_coding;transcript_biotype:protein_coding;gene_symbol:NSUN5;description:NOP2/Sun;RNA;methyltransferase;5;[Source:NCBI;gene;(formerly;Entrezgene);Acc:103246645]
ENSCSAT00000005987.1	1870	1712.51	91.8259	72	cdna;chromosome:ChlSab1.1:9:61813686:61868987:-1;gene:ENSCSAG00000007934.1;gene_biotype:protein_coding;transcript_biotype:protein_coding;gene_symbol:TSPAN15;description:tetraspanin;15;[Source:NCBI;gene;(formerly;Entrezgene);Acc:103216073]
ENSCSAT00000016126.1	1397	1239.51	91.626	52	cdna;chromosome:ChlSab1.1:28:11955521:11962195:-1;gene:ENSCSAG00000018027.1;gene_biotype:protein_coding;transcript_biotype:protein_coding;gene_symbol:ZNHIT1;description:zinc;finger;HIT-type;containing;1;[Source:NCBI;gene;(formerly;Entrezgene);Acc:103246689]
ENSCSAT00000004519.1	1898	1740.51	91.6035	73	cdna;chromosome:ChlSab1.1:1:11910318:11928682:1;gene:ENSCSAG00000006479.1;gene_biotype:protein_coding;transcript_biotype:protein_coding;gene_symbol:FADS3;description:fatty;acid;desaturase;3;[Source:NCBI;gene;(formerly;Entrezgene);Acc:103234191]
ENSCSAT00000001693.1	2234	2076.51	91.5063	87	cdna;chromosome:ChlSab1.1:5:61113213:61132995:-1;gene:ENSCSAG00000003664.1;gene_biotype:protein_coding;transcript_biotype:protein_coding;gene_symbol:KARS1;description:lysyl-tRNA;synthetase;1;[Source:NCBI;gene;(formerly;Entrezgene);Acc:103233321]
ENSCSAT00000013407.1	2258	2100.51	91.5006	88	cdna;chromosome:ChlSab1.1:14:34275289:34280786:-1;gene:ENSCSAG00000015312.1;gene_biotype:protein_coding;transcript_biotype:protein_coding;gene_symbol:SPR;description:sepiapterin;reductase;[Source:NCBI;gene;(formerly;Entrezgene);Acc:103220069]
ENSCSAT00000005187.1	1400	1242.51	91.4048	52	cdna;chromosome:ChlSab1.1:16:22481747:22485186:-1;gene:ENSCSAG00000007143.1;gene_biotype:protein_coding;transcript_biotype:protein_coding;gene_symbol:RAB34;description:ras-related;protein;Rab-34;[Source:NCBI;gene;(formerly;Entrezgene);Acc:103242629]
ENSCSAT00000005350.1	755	597.561	91.3745	25	cdna;chromosome:ChlSab1.1:21:112149970:112155300:1;gene:ENSCSAG00000007308.1;gene_biotype:protein_coding;transcript_biotype:protein_coding;gene_symbol:GSTK1;description:glutathione;S-transferase;kappa;1;[Source:NCBI;gene;(formerly;Entrezgene);Acc:103227127]
ENSCSAT00000004766.1	660	502.582	91.2597	21	cdna;chromosome:ChlSab1.1:1:11113254:11115771:-1;gene:ENSCSAG00000006726.1;gene_biotype:protein_coding;transcript_biotype:protein_coding;gene_symbol:TMEM179B;description:transmembrane;protein;179B;[Source:NCBI;gene;(formerly;Entrezgene);Acc:103233876]
ENSCSAT00000002699.1	3417	3259.51	91.1282	136	cdna;chromosome:ChlSab1.1:11:53607008:53635793:1;gene:ENSCSAG00000004671.1;gene_biotype:protein_coding;transcript_biotype:protein_coding;gene_symbol:OS9;description:OS9;endoplasmic;reticulum;lectin;[Source:NCBI;gene;(formerly;Entrezgene);Acc:103238586]
ENSCSAT00000017437.1	1261	1103.51	91.0431	46	cdna;chromosome:ChlSab1.1:20:96704706:96716940:1;gene:ENSCSAG00000001096.1;gene_biotype:protein_coding;transcript_biotype:protein_coding;gene_symbol:TRAPPC3;description:trafficking;protein;particle;complex;3;[Source:NCBI;gene;(formerly;Entrezgene);Acc:103225117]
ENSCSAT00000014494.1	3495	3337.51	90.9617	139	cdna;chromosome:ChlSab1.1:8:20630437:20656154:1;gene:ENSCSAG00000016403.1;gene_biotype:protein_coding;transcript_biotype:protein_coding;gene_symbol:SORBS3;description:sorbin;and;SH3;domain;containing;3;[Source:NCBI;gene;(formerly;Entrezgene);Acc:103215456]
ENSCSAT00000006038.1	2080	1922.51	90.884	80	cdna;chromosome:ChlSab1.1:6:7796045:7839244:1;gene:ENSCSAG00000008009.1;gene_biotype:protein_coding;transcript_biotype:protein_coding;gene_symbol:HNRNPM;description:heterogeneous;nuclear;ribonucleoprotein;M;[Source:HGNC;Symbol;Acc:HGNC:5046]
ENSCSAT00000013327.1	3378	3220.51	90.8754	134	cdna;chromosome:ChlSab1.1:14:36121019:36130004:1;gene:ENSCSAG00000015229.1;gene_biotype:protein_coding;transcript_biotype:protein_coding;gene_symbol:TEX261;description:testis;expressed;261;[Source:NCBI;gene;(formerly;Entrezgene);Acc:103220078]
ENSCSAT00000007761.1	1530	1372.51	90.7037	57	cdna;chromosome:ChlSab1.1:17:38291217:38307745:1;gene:ENSCSAG00000009695.1;gene_biotype:protein_coding;transcript_biotype:protein_coding;gene_symbol:LEMD2;description:LEM;domain;nuclear;envelope;protein;2;[Source:HGNC;Symbol;Acc:HGNC:21244]
ENSCSAT00000013201.1	1434	1276.51	90.6812	53	cdna;chromosome:ChlSab1.1:2:13387727:13459105:-1;gene:ENSCSAG00000015111.1;gene_biotype:protein_coding;transcript_biotype:protein_coding;gene_symbol:PTPN1;description:protein;tyrosine;phosphatase;non-receptor;type;1;[Source:NCBI;gene;(formerly;Entrezgene);Acc:103244412]
ENSCSAT00000007492.1	784	626.557	90.6315	26	cdna;chromosome:ChlSab1.1:9:51404808:51427599:-1;gene:ENSCSAG00000009424.1;gene_biotype:protein_coding;transcript_biotype:protein_coding;gene_symbol:PRXL2A;description:peroxiredoxin;like;2A;[Source:HGNC;Symbol;Acc:HGNC:28651]
ENSCSAT00000016540.1	2351	2193.51	90.6083	91	cdna;chromosome:ChlSab1.1:20:8768112:8779311:-1;gene:ENSCSAG00000001988.1;gene_biotype:protein_coding;transcript_biotype:protein_coding;gene_symbol:ADAM15;description:ADAM;metallopeptidase;domain;15;[Source:HGNC;Symbol;Acc:HGNC:193]
ENSCSAT00000008887.1	2762	2604.51	90.5657	108	cdna;chromosome:ChlSab1.1:23:57238336:57261710:1;gene:ENSCSAG00000010800.1;gene_biotype:protein_coding;transcript_biotype:protein_coding;gene_symbol:LARP1;description:La;ribonucleoprotein;1,;translational;regulator;[Source:HGNC;Symbol;Acc:HGNC:29531]
ENSCSAT00000002778.1	1317	1159.51	90.4133	48	cdna;chromosome:ChlSab1.1:11:53499432:53509799:1;gene:ENSCSAG00000004746.1;gene_biotype:protein_coding;transcript_biotype:protein_coding;gene_symbol:PIP4K2C;description:phosphatidylinositol-5-phosphate;4-kinase;type;2;gamma;[Source:NCBI;gene;(formerly;Entrezgene);Acc:103238583]
ENSCSAT00000003143.1	3686	3528.51	90.3707	146	cdna;chromosome:ChlSab1.1:9:106436685:106474544:1;gene:ENSCSAG00000005111.1;gene_biotype:protein_coding;transcript_biotype:protein_coding;gene_symbol:HABP2;description:hyaluronan;binding;protein;2;[Source:NCBI;gene;(formerly;Entrezgene);Acc:103216535]
ENSCSAT00000009563.1	1029	871.514	90.2184	36	cdna;chromosome:ChlSab1.1:17:29262846:29272245:-1;gene:ENSCSAG00000011487.1;gene_biotype:protein_coding;transcript_biotype:protein_coding;description:ribosomal;protein;L7;like;1;[Source:NCBI;gene;(formerly;Entrezgene);Acc:103221489]
ENSCSAT00000016422.1	642	484.586	90.1418	20	cdna;scaffold:ChlSab1.1:KE147562.1:115801:121111:-1;gene:ENSCSAG00000018323.1;gene_biotype:protein_coding;transcript_biotype:protein_coding;gene_symbol:IGLL1;description:immunoglobulin;lambda-like;polypeptide;1;[Source:NCBI;gene;(formerly;Entrezgene);Acc:103247548]
ENSCSAT00000013290.1	2731	2573.51	89.9593	106	cdna;chromosome:ChlSab1.1:22:10497658:10507325:-1;gene:ENSCSAG00000015198.1;gene_biotype:protein_coding;transcript_biotype:protein_coding;gene_symbol:QARS1;description:glutaminyl-tRNA;synthetase;1;[Source:HGNC;Symbol;Acc:HGNC:9751]
ENSCSAT00000005080.1	765	607.557	89.871	25	cdna;chromosome:ChlSab1.1:12:104303265:104306251:-1;gene:ENSCSAG00000007043.1;gene_biotype:protein_coding;transcript_biotype:protein_coding;gene_symbol:BARX1;description:BARX;homeobox;1;[Source:NCBI;gene;(formerly;Entrezgene);Acc:103219777]
ENSCSAT00000014948.1	7865	7707.51	89.828	317	cdna;chromosome:ChlSab1.1:27:12156227:12386980:-1;gene:ENSCSAG00000016865.1;gene_biotype:protein_coding;transcript_biotype:protein_coding;gene_symbol:TBC1D1;description:TBC1;domain;family;member;1;[Source:NCBI;gene;(formerly;Entrezgene);Acc:103246222]
ENSCSAT00000013890.1	1738	1580.51	89.8218	65	cdna;chromosome:ChlSab1.1:27:45807306:45810849:1;gene:ENSCSAG00000015797.1;gene_biotype:protein_coding;transcript_biotype:protein_coding;gene_symbol:MFSD10;description:major;facilitator;superfamily;domain;containing;10;[Source:HGNC;Symbol;Acc:HGNC:16894]
ENSCSAT00000016177.1	1009	851.514	89.7725	35	cdna;chromosome:ChlSab1.1:28:10775474:10788634:-1;gene:ENSCSAG00000018081.1;gene_biotype:protein_coding;transcript_biotype:protein_coding;gene_symbol:ORAI2;description:ORAI;calcium;release-activated;calcium;modulator;2;[Source:NCBI;gene;(formerly;Entrezgene);Acc:103246677]
ENSCSAT00000011743.1	1301	1143.51	89.7684	47	cdna;chromosome:ChlSab1.1:23:36919745:36951192:1;gene:ENSCSAG00000013646.1;gene_biotype:protein_coding;transcript_biotype:protein_coding;gene_symbol:TCF7;description:transcription;factor;7;[Source:NCBI;gene;(formerly;Entrezgene);Acc:103244543]
ENSCSAT00000007463.1	2688	2530.51	89.7618	104	cdna;chromosome:ChlSab1.1:24:83337060:83368775:1;gene:ENSCSAG00000009471.1;gene_biotype:protein_coding;transcript_biotype:protein_coding
ENSCSAT00000015465.1	1277	1119.51	89.7419	46	cdna;chromosome:ChlSab1.1:14:685321:690544:1;gene:ENSCSAG00000017371.1;gene_biotype:protein_coding;transcript_biotype:protein_coding;gene_symbol:CIAO1;description:cytosolic;iron-sulfur;assembly;component;1;[Source:NCBI;gene;(formerly;Entrezgene);Acc:103241067]
ENSCSAT00000001782.1	3057	2899.51	89.6373	119	cdna;chromosome:ChlSab1.1:6:34690462:34720781:-1;gene:ENSCSAG00000003750.1;gene_biotype:protein_coding;transcript_biotype:protein_coding;gene_symbol:AKT2;description:AKT;serine/threonine;kinase;2;[Source:HGNC;Symbol;Acc:HGNC:392]
ENSCSAT00000015734.1	1912	1754.51	89.6278	72	cdna;chromosome:ChlSab1.1:28:16880884:16962734:-1;gene:ENSCSAG00000017639.1;gene_biotype:protein_coding;transcript_biotype:protein_coding;gene_symbol:FOXK1;description:forkhead;box;K1;[Source:NCBI;gene;(formerly;Entrezgene);Acc:103246851]
ENSCSAT00000009020.1	2764	2606.51	89.5865	106.914	cdna;chromosome:ChlSab1.1:21:84913093:84963303:1;gene:ENSCSAG00000010935.1;gene_biotype:protein_coding;transcript_biotype:protein_coding;gene_symbol:TES;description:testin;LIM;domain;protein;[Source:NCBI;gene;(formerly;Entrezgene);Acc:103226766]
ENSCSAT00000004939.1	2596	2438.51	89.5657	100	cdna;chromosome:ChlSab1.1:19:20611598:20644164:1;gene:ENSCSAG00000006896.1;gene_biotype:protein_coding;transcript_biotype:protein_coding;gene_symbol:MICALL1;description:MICAL;like;1;[Source:NCBI;gene;(formerly;Entrezgene);Acc:103223296]
ENSCSAT00000006159.1	670	512.574	89.4808	21	cdna;chromosome:ChlSab1.1:17:42430478:42432659:-1;gene:ENSCSAG00000008107.1;gene_biotype:protein_coding;transcript_biotype:protein_coding;gene_symbol:PPP1R11;description:protein;phosphatase;1;regulatory;inhibitor;subunit;11;[Source:NCBI;gene;(formerly;Entrezgene);Acc:103221846]
ENSCSAT00000012323.1	2186	2028.51	89.3649	83	cdna;chromosome:ChlSab1.1:25:26453242:26462549:1;gene:ENSCSAG00000014228.1;gene_biotype:protein_coding;transcript_biotype:protein_coding;gene_symbol:ADIPOR1;description:adiponectin;receptor;1;[Source:NCBI;gene;(formerly;Entrezgene);Acc:103230296]
ENSCSAT00000003835.1	1302	1144.51	89.2974	46.794	cdna;chromosome:ChlSab1.1:16:34733201:34735139:-1;gene:ENSCSAG00000005804.1;gene_biotype:protein_coding;transcript_biotype:protein_coding
ENSCSAT00000001644.1	5663	5505.51	89.2589	225	cdna;chromosome:ChlSab1.1:16:61505825:61551890:1;gene:ENSCSAG00000003614.1;gene_biotype:protein_coding;transcript_biotype:protein_coding;gene_symbol:EFTUD2;description:elongation;factor;Tu;GTP;binding;domain;containing;2;[Source:NCBI;gene;(formerly;Entrezgene);Acc:103243308]
ENSCSAT00000007634.1	2629	2471.51	89.2535	101	cdna;chromosome:ChlSab1.1:1:2812016:2871800:-1;gene:ENSCSAG00000009547.1;gene_biotype:protein_coding;transcript_biotype:protein_coding;gene_symbol:CARS1;description:cysteinyl-tRNA;synthetase;1;[Source:NCBI;gene;(formerly;Entrezgene);Acc:103242251]
ENSCSAT00000016459.1	1944	1786.51	89.2449	73	cdna;scaffold:ChlSab1.1:KE148108.1:735146:743323:1;gene:ENSCSAG00000018360.1;gene_biotype:protein_coding;transcript_biotype:protein_coding;gene_symbol:PGRMC1;description:progesterone;receptor;membrane;component;1;[Source:NCBI;gene;(formerly;Entrezgene);Acc:103247328]
ENSCSAT00000001986.1	966	808.517	89.1439	33	cdna;chromosome:ChlSab1.1:6:33439682:33449272:-1;gene:ENSCSAG00000003973.1;gene_biotype:protein_coding;transcript_biotype:protein_coding;gene_symbol:ECH1;description:enoyl-CoA;hydratase;1;[Source:NCBI;gene;(formerly;Entrezgene);Acc:103234640]
ENSCSAT00000017860.1	1996	1838.51	89.0966	75	cdna;chromosome:ChlSab1.1:20:130216225:130228962:1;gene:ENSCSAG00000000675.1;gene_biotype:protein_coding;transcript_biotype:protein_coding;gene_symbol:SDF4;description:stromal;cell;derived;factor;4;[Source:NCBI;gene;(formerly;Entrezgene);Acc:103225817]
ENSCSAT00000011203.1	8006	7848.51	89.0491	320	cdna;chromosome:ChlSab1.1:24:46085751:46196886:-1;gene:ENSCSAG00000013110.1;gene_biotype:protein_coding;transcript_biotype:protein_coding;gene_symbol:ACTN1;description:actinin;alpha;1;[Source:NCBI;gene;(formerly;Entrezgene);Acc:103229232]
ENSCSAT00000004589.1	13011	12853.5	89.0382	524	cdna;chromosome:ChlSab1.1:1:11366948:11384100:1;gene:ENSCSAG00000006556.1;gene_biotype:protein_coding;transcript_biotype:protein_coding;gene_symbol:AHNAK;description:AHNAK;nucleoprotein;[Source:HGNC;Symbol;Acc:HGNC:347]
ENSCSAT00000017849.1	1115	957.514	88.9583	39	cdna;chromosome:ChlSab1.1:20:130075295:130076765:1;gene:ENSCSAG00000000686.1;gene_biotype:protein_coding;transcript_biotype:protein_coding;gene_symbol:AURKAIP1;description:aurora;kinase;A;interacting;protein;1;[Source:NCBI;gene;(formerly;Entrezgene);Acc:103225799]
ENSCSAT00000002451.1	1607	1449.51	88.8989	59	cdna;chromosome:ChlSab1.1:6:30539721:30548414:1;gene:ENSCSAG00000004422.1;gene_biotype:protein_coding;transcript_biotype:protein_coding;gene_symbol:RBM42;description:RNA;binding;motif;protein;42;[Source:NCBI;gene;(formerly;Entrezgene);Acc:103234525]
ENSCSAT00000008620.1	8516	8358.51	88.8417	340	cdna;chromosome:ChlSab1.1:12:44876643:44907072:1;gene:ENSCSAG00000010542.1;gene_biotype:protein_coding;transcript_biotype:protein_coding;gene_symbol:TLN1;description:talin;1;[Source:NCBI;gene;(formerly;Entrezgene);Acc:103219208]
ENSCSAT00000006879.1	4371	4213.51	88.7053	171.13	cdna;chromosome:ChlSab1.1:X:98489874:98611951:-1;gene:ENSCSAG00000008818.1;gene_biotype:protein_coding;transcript_biotype:protein_coding;gene_symbol:CHRDL1;description:chordin;like;1;[Source:NCBI;gene;(formerly;Entrezgene);Acc:103232486]
ENSCSAT00000012229.1	1588	1430.51	88.5529	58	cdna;chromosome:ChlSab1.1:2:19299828:19321466:1;gene:ENSCSAG00000014169.1;gene_biotype:protein_coding;transcript_biotype:protein_coding;gene_symbol:SERINC3;description:serine;incorporator;3;[Source:HGNC;Symbol;Acc:HGNC:11699]
ENSCSAT00000001993.1	1244	1086.51	88.4472	44	cdna;chromosome:ChlSab1.1:11:75133186:75219072:-1;gene:ENSCSAG00000003962.1;gene_biotype:protein_coding;transcript_biotype:protein_coding;gene_symbol:PAWR;description:pro-apoptotic;WT1;regulator;[Source:NCBI;gene;(formerly;Entrezgene);Acc:103238780]
ENSCSAT00000004098.1	3098	2940.51	88.3874	119	cdna;chromosome:ChlSab1.1:16:30842652:30849465:-1;gene:ENSCSAG00000006059.1;gene_biotype:protein_coding;transcript_biotype:protein_coding;gene_symbol:LHX1;description:LIM;homeobox;1;[Source:NCBI;gene;(formerly;Entrezgene);Acc:103242793]
ENSCSAT00000001089.1	1419	1261.51	88.2968	51	cdna;chromosome:ChlSab1.1:16:64289828:64296922:-1;gene:ENSCSAG00000003059.1;gene_biotype:protein_coding;transcript_biotype:protein_coding;gene_symbol:CNP;description:2',3'-cyclic;nucleotide;3';phosphodiesterase;[Source:NCBI;gene;(formerly;Entrezgene);Acc:103243434]
ENSCSAT00000007028.1	1370	1212.51	88.2625	49	cdna;chromosome:ChlSab1.1:17:40063755:40198451:1;gene:ENSCSAG00000008969.1;gene_biotype:protein_coding;transcript_biotype:protein_coding;gene_symbol:NELFE;description:negative;elongation;factor;complex;member;E;[Source:HGNC;Symbol;Acc:HGNC:13974]
ENSCSAT00000008345.1	5653	5495.51	88.229	222	cdna;chromosome:ChlSab1.1:12:45545507:45563380:1;gene:ENSCSAG00000010257.1;gene_biotype:protein_coding;transcript_biotype:protein_coding;gene_symbol:VCP;description:valosin;containing;protein;[Source:NCBI;gene;(formerly;Entrezgene);Acc:103219235]
ENSCSAT00000001514.1	603	445.595	88.2265	18	cdna;chromosome:ChlSab1.1:16:62326740:62359696:1;gene:ENSCSAG00000003486.1;gene_biotype:protein_coding;transcript_biotype:protein_coding;gene_symbol:LSM12;description:LSM12;homolog;[Source:NCBI;gene;(formerly;Entrezgene);Acc:103243338]
ENSCSAT00000000939.1	13575	13417.5	88.2255	542	cdna;chromosome:ChlSab1.1:7:132483032:132616112:-1;gene:ENSCSAG00000002910.1;gene_biotype:protein_coding;transcript_biotype:protein_coding;gene_symbol:FAT1;description:FAT;atypical;cadherin;1;[Source:HGNC;Symbol;Acc:HGNC:3595]
ENSCSAT00000009641.1	975	817.516	88.1627	33	cdna;chromosome:ChlSab1.1:14:75186925:75215276:-1;gene:ENSCSAG00000011554.1;gene_biotype:protein_coding;transcript_biotype:protein_coding;gene_symbol:YIPF4;description:Yip1;domain;family;member;4;[Source:NCBI;gene;(formerly;Entrezgene);Acc:103220527]
ENSCSAT00000019772.1	678	520.574	88.1057	21	cdna;chromosome:ChlSab1.1:12:983946:984623:1;gene:ENSCSAG00000019682.1;gene_biotype:protein_coding;transcript_biotype:protein_coding;gene_symbol:TMEM203;description:transmembrane;protein;203;[Source:NCBI;gene;(formerly;Entrezgene);Acc:103239572]
ENSCSAT00000011620.1	4050	3892.51	88.092	157	cdna;chromosome:ChlSab1.1:14:60273296:60287200:1;gene:ENSCSAG00000013524.1;gene_biotype:protein_coding;transcript_biotype:protein_coding;gene_symbol:MCFD2;description:multiple;coagulation;factor;deficiency;2,;ER;cargo;receptor;complex;subunit;[Source:NCBI;gene;(formerly;Entrezgene);Acc:103220327]
ENSCSAT00000007733.1	852	694.541	88.0494	28	cdna;chromosome:ChlSab1.1:14:80399513:80404280:-1;gene:ENSCSAG00000009652.1;gene_biotype:protein_coding;transcript_biotype:protein_coding;gene_symbol:ATRAID;description:all-trans;retinoic;acid;induced;differentiation;factor;[Source:NCBI;gene;(formerly;Entrezgene);Acc:103220606]
ENSCSAT00000014486.1	1522	1364.51	88.0342	55	cdna;chromosome:ChlSab1.1:8:20659361:20674900:1;gene:ENSCSAG00000016392.1;gene_biotype:protein_coding;transcript_biotype:protein_coding;gene_symbol:PDLIM2;description:PDZ;and;LIM;domain;2;[Source:NCBI;gene;(formerly;Entrezgene);Acc:103215454]
ENSCSAT00000010039.1	975	817.516	87.9333	32.914	cdna;chromosome:ChlSab1.1:15:36789265:36790279:1;gene:ENSCSAG00000011950.1;gene_biotype:pseudogene;transcript_biotype:pseudogene
ENSCSAT00000010507.1	1287	1129.51	87.912	45.465	cdna;chromosome:ChlSab1.1:17:27911294:27913443:1;gene:ENSCSAG00000012413.1;gene_biotype:protein_coding;transcript_biotype:protein_coding;gene_symbol:SLC35B2;description:solute;carrier;family;35;member;B2;[Source:HGNC;Symbol;Acc:HGNC:16872]
ENSCSAT00000004917.1	1003	845.514	87.8264	34	cdna;chromosome:ChlSab1.1:1:10428432:10437287:-1;gene:ENSCSAG00000006870.1;gene_biotype:protein_coding;transcript_biotype:protein_coding;gene_symbol:SPINDOC;description:spindlin;interactor;and;repressor;of;chromatin;binding;[Source:HGNC;Symbol;Acc:HGNC:25115]
ENSCSAT00000004290.1	3268	3110.51	87.7697	125	cdna;chromosome:ChlSab1.1:1:12942213:12959947:1;gene:ENSCSAG00000006254.1;gene_biotype:protein_coding;transcript_biotype:protein_coding;gene_symbol:PRPF19;description:pre-mRNA;processing;factor;19;[Source:NCBI;gene;(formerly;Entrezgene);Acc:103234589]
ENSCSAT00000009807.1	1453	1295.51	87.6654	52	cdna;chromosome:ChlSab1.1:6:2041384:2047542:1;gene:ENSCSAG00000011717.1;gene_biotype:protein_coding;transcript_biotype:protein_coding;gene_symbol:SF3A2;description:splicing;factor;3a;subunit;2;[Source:NCBI;gene;(formerly;Entrezgene);Acc:103233642]
ENSCSAT00000006238.1	2576	2418.51	87.5971	97	cdna;chromosome:ChlSab1.1:19:18164879:18189284:1;gene:ENSCSAG00000008193.1;gene_biotype:protein_coding;transcript_biotype:protein_coding;gene_symbol:MCM5;description:minichromosome;maintenance;complex;component;5;[Source:NCBI;gene;(formerly;Entrezgene);Acc:103223231]
ENSCSAT00000003748.1	1305	1147.51	87.5521	46	cdna;chromosome:ChlSab1.1:9:92779573:92796943:-1;gene:ENSCSAG00000005712.1;gene_biotype:protein_coding;transcript_biotype:protein_coding;gene_symbol:COX15;description:cytochrome;c;oxidase;assembly;homolog;COX15;[Source:HGNC;Symbol;Acc:HGNC:2263]
ENSCSAT00000000428.1	831	673.542	87.5519	27	cdna;chromosome:ChlSab1.1:16:70186767:70200610:-1;gene:ENSCSAG00000002415.1;gene_biotype:protein_coding;transcript_biotype:protein_coding;gene_symbol:TK1;description:thymidine;kinase;1;[Source:HGNC;Symbol;Acc:HGNC:11830]
ENSCSAT00000001294.1	1408	1250.51	87.5412	50.123	cdna;chromosome:ChlSab1.1:16:63675253:63680571:-1;gene:ENSCSAG00000003279.1;gene_biotype:protein_coding;transcript_biotype:protein_coding;gene_symbol:TUBG1;description:tubulin;gamma;1;[Source:NCBI;gene;(formerly;Entrezgene);Acc:103243400]
ENSCSAT00000014264.1	1283	1125.51	87.323	45	cdna;chromosome:ChlSab1.1:14:21611040:21615615:-1;gene:ENSCSAG00000016171.1;gene_biotype:protein_coding;transcript_biotype:protein_coding;gene_symbol:MAT2A;description:methionine;adenosyltransferase;2A;[Source:NCBI;gene;(formerly;Entrezgene);Acc:103219945]
ENSCSAT00000004281.1	6490	6332.51	87.2592	253	cdna;chromosome:ChlSab1.1:11:45005637:45025501:-1;gene:ENSCSAG00000006246.1;gene_biotype:protein_coding;transcript_biotype:protein_coding;gene_symbol:ADCY6;description:adenylate;cyclase;6;[Source:NCBI;gene;(formerly;Entrezgene);Acc:103238242]
ENSCSAT00000002707.1	1410	1252.51	87.1875	50	cdna;chromosome:ChlSab1.1:1:51905198:52076909:-1;gene:ENSCSAG00000004676.1;gene_biotype:protein_coding;transcript_biotype:protein_coding;gene_symbol:TEAD1;description:TEA;domain;transcription;factor;1;[Source:HGNC;Symbol;Acc:HGNC:11714]
ENSCSAT00000007639.1	2563	2405.51	87.1626	96	cdna;chromosome:ChlSab1.1:1:2755735:2791346:-1;gene:ENSCSAG00000009554.1;gene_biotype:protein_coding;transcript_biotype:protein_coding;gene_symbol:NAP1L4;description:nucleosome;assembly;protein;1;like;4;[Source:NCBI;gene;(formerly;Entrezgene);Acc:103241693]
ENSCSAT00000004639.1	2239	2081.51	87.0895	83	cdna;chromosome:ChlSab1.1:21:119652127:119703458:-1;gene:ENSCSAG00000006601.1;gene_biotype:protein_coding;transcript_biotype:protein_coding;gene_symbol:RHEB;description:Ras;homolog,;mTORC1;binding;[Source:HGNC;Symbol;Acc:HGNC:10011]
ENSCSAT00000012856.1	1914	1756.51	87.0389	70	cdna;chromosome:ChlSab1.1:2:17525182:17534215:1;gene:ENSCSAG00000014758.1;gene_biotype:protein_coding;transcript_biotype:protein_coding;gene_symbol:SLC35C2;description:solute;carrier;family;35;member;C2;[Source:NCBI;gene;(formerly;Entrezgene);Acc:103245005]
ENSCSAT00000014579.1	3520	3362.51	87.0377	134	cdna;chromosome:ChlSab1.1:12:1080305:1105027:-1;gene:ENSCSAG00000016484.1;gene_biotype:protein_coding;transcript_biotype:protein_coding;gene_symbol:MAN1B1;description:mannosidase;alpha;class;1B;member;1;[Source:NCBI;gene;(formerly;Entrezgene);Acc:103239582]
ENSCSAT00000005281.1	2140	1982.51	87.0317	79	cdna;chromosome:ChlSab1.1:6:9427191:9439913:-1;gene:ENSCSAG00000007234.1;gene_biotype:protein_coding;transcript_biotype:protein_coding;gene_symbol:CDC37;description:cell;division;cycle;37,;HSP90;cochaperone;[Source:NCBI;gene;(formerly;Entrezgene);Acc:103233899]
ENSCSAT00000016791.1	534	376.64	86.9825	15	cdna;chromosome:ChlSab1.1:6:47978256:47979851:1;gene:ENSCSAG00000001739.1;gene_biotype:protein_coding;transcript_biotype:protein_coding;gene_symbol:TMEM190;description:transmembrane;protein;190;[Source:NCBI;gene;(formerly;Entrezgene);Acc:103235304]
ENSCSAT00000002427.1	4427	4269.51	86.9636	170	cdna;chromosome:ChlSab1.1:11:62922885:62966994:1;gene:ENSCSAG00000004354.1;gene_biotype:protein_coding;transcript_biotype:protein_coding;gene_symbol:CAND1;description:cullin;associated;and;neddylation;dissociated;1;[Source:NCBI;gene;(formerly;Entrezgene);Acc:103238666]
ENSCSAT00000000741.1	462	304.697	86.8243	12.113	cdna;chromosome:ChlSab1.1:11:105095813:105121084:1;gene:ENSCSAG00000002723.1;gene_biotype:protein_coding;transcript_biotype:protein_coding
ENSCSAT00000003715.1	5116	4958.51	86.8097	197.085	cdna;chromosome:ChlSab1.1:1:18627611:18650706:1;gene:ENSCSAG00000005680.1;gene_biotype:protein_coding;transcript_biotype:protein_coding;gene_symbol:ARHGAP1;description:Rho;GTPase;activating;protein;1;[Source:HGNC;Symbol;Acc:HGNC:673]
ENSCSAT00000014337.1	3482	3324.51	86.7187	132	cdna;chromosome:ChlSab1.1:8:21416787:21516854:-1;gene:ENSCSAG00000016241.1;gene_biotype:protein_coding;transcript_biotype:protein_coding;gene_symbol:LOXL2;description:lysyl;oxidase;like;2;[Source:NCBI;gene;(formerly;Entrezgene);Acc:103215478]
ENSCSAT00000004775.1	3583	3425.51	86.7122	136	cdna;chromosome:ChlSab1.1:X:128770268:128786961:-1;gene:ENSCSAG00000006732.1;gene_biotype:protein_coding;transcript_biotype:protein_coding;gene_symbol:G6PD;description:glucose-6-phosphate;dehydrogenase;[Source:NCBI;gene;(formerly;Entrezgene);Acc:103232833]
ENSCSAT00000012588.1	1241	1083.51	86.6764	43	cdna;chromosome:ChlSab1.1:2:18074767:18098108:-1;gene:ENSCSAG00000014499.1;gene_biotype:protein_coding;transcript_biotype:protein_coding;gene_symbol:DNTTIP1;description:deoxynucleotidyltransferase;terminal;interacting;protein;1;[Source:NCBI;gene;(formerly;Entrezgene);Acc:103245296]
ENSCSAT00000011362.1	459	301.697	86.6577	11.97	cdna;chromosome:ChlSab1.1:26:16700286:16700763:1;gene:ENSCSAG00000013271.1;gene_biotype:protein_coding;transcript_biotype:protein_coding
ENSCSAT00000006820.1	2150	1992.51	86.5949	79	cdna;chromosome:ChlSab1.1:14:81361612:81411432:-1;gene:ENSCSAG00000008753.1;gene_biotype:protein_coding;transcript_biotype:protein_coding;gene_symbol:HADHB;description:hydroxyacyl-CoA;dehydrogenase;trifunctional;multienzyme;complex;subunit;beta;[Source:NCBI;gene;(formerly;Entrezgene);Acc:103220641]
ENSCSAT00000006029.1	4373	4215.51	86.5232	167	cdna;chromosome:ChlSab1.1:5:15259208:15322478:1;gene:ENSCSAG00000007980.1;gene_biotype:protein_coding;transcript_biotype:protein_coding;description:nodal;modulator;1;[Source:NCBI;gene;(formerly;Entrezgene);Acc:103228897]
ENSCSAT00000003354.1	560	402.615	86.5161	15.949	cdna;chromosome:ChlSab1.1:11:51663733:51667369:1;gene:ENSCSAG00000005327.1;gene_biotype:protein_coding;transcript_biotype:protein_coding
ENSCSAT00000004636.1	5434	5276.51	86.5099	209	cdna;chromosome:ChlSab1.1:6:11387683:11414709:-1;gene:ENSCSAG00000006597.1;gene_biotype:protein_coding;transcript_biotype:protein_coding;gene_symbol:TNPO2;description:transportin;2;[Source:NCBI;gene;(formerly;Entrezgene);Acc:103233984]
ENSCSAT00000011987.1	1825	1667.51	86.4453	66	cdna;chromosome:ChlSab1.1:22:13353588:13359569:1;gene:ENSCSAG00000013897.1;gene_biotype:protein_coding;transcript_biotype:protein_coding;description:aminoacylase;1;[Source:NCBI;gene;(formerly;Entrezgene);Acc:103227712]
ENSCSAT00000019027.1	384	226.854	86.4191	8.976	cdna;chromosome:ChlSab1.1:15:30514459:30514842:-1;gene:ENSCSAG00000018937.1;gene_biotype:processed_pseudogene;transcript_biotype:processed_pseudogene
ENSCSAT00000003603.1	2129	1971.51	86.4095	78	cdna;chromosome:ChlSab1.1:6:15997806:16006805:1;gene:ENSCSAG00000005564.1;gene_biotype:protein_coding;transcript_biotype:protein_coding;gene_symbol:PGLS;description:6-phosphogluconolactonase;[Source:NCBI;gene;(formerly;Entrezgene);Acc:103234145]
ENSCSAT00000019698.1	1212	1054.51	86.3305	41.682	cdna;chromosome:ChlSab1.1:21:38000709:38001920:-1;gene:ENSCSAG00000019608.1;gene_biotype:protein_coding;transcript_biotype:protein_coding
ENSCSAT00000004892.1	816	658.545	86.2292	26	cdna;chromosome:ChlSab1.1:1:10632566:10660709:1;gene:ENSCSAG00000006852.1;gene_biotype:protein_coding;transcript_biotype:protein_coding;gene_symbol:PLAAT3;description:phospholipase;A;and;acyltransferase;3;[Source:HGNC;Symbol;Acc:HGNC:17825]
ENSCSAT00000019697.1	411	253.758	86.069	10	cdna;chromosome:ChlSab1.1:21:30917083:30917493:1;gene:ENSCSAG00000019607.1;gene_biotype:protein_coding;transcript_biotype:protein_coding
ENSCSAT00000005182.1	5313	5155.51	85.9985	203	cdna;chromosome:ChlSab1.1:22:60371554:60428764:1;gene:ENSCSAG00000007135.1;gene_biotype:protein_coding;transcript_biotype:protein_coding;gene_symbol:FSTL1;description:follistatin;like;1;[Source:NCBI;gene;(formerly;Entrezgene);Acc:103228208]
ENSCSAT00000005882.1	7657	7499.51	85.8124	294.657	cdna;chromosome:ChlSab1.1:1:8681156:8703740:1;gene:ENSCSAG00000007833.1;gene_biotype:protein_coding;transcript_biotype:protein_coding;gene_symbol:LTBP3;description:latent;transforming;growth;factor;beta;binding;protein;3;[Source:NCBI;gene;(formerly;Entrezgene);Acc:103228770]
ENSCSAT00000009018.1	3874	3716.51	85.7993	146	cdna;chromosome:ChlSab1.1:8:111486048:111507729:-1;gene:ENSCSAG00000010927.1;gene_biotype:protein_coding;transcript_biotype:protein_coding;gene_symbol:RAD21;description:RAD21;cohesin;complex;component;[Source:NCBI;gene;(formerly;Entrezgene);Acc:103237327]
ENSCSAT00000010973.1	2222	2064.51	85.79	81.094	cdna;chromosome:ChlSab1.1:X:46267358:46271818:1;gene:ENSCSAG00000012883.1;gene_biotype:protein_coding;transcript_biotype:protein_coding;gene_symbol:PLP2;description:proteolipid;protein;2;[Source:HGNC;Symbol;Acc:HGNC:9087]
ENSCSAT00000014581.1	896	738.537	85.7615	29	cdna;chromosome:ChlSab1.1:27:32697599:32723016:1;gene:ENSCSAG00000016485.1;gene_biotype:protein_coding;transcript_biotype:protein_coding;gene_symbol:QDPR;description:quinoid;dihydropteridine;reductase;[Source:NCBI;gene;(formerly;Entrezgene);Acc:103246311]
ENSCSAT00000005561.1	335	178.342	85.7257	7	cdna;chromosome:ChlSab1.1:2:88515357:88528936:-1;gene:ENSCSAG00000007518.1;gene_biotype:protein_coding;transcript_biotype:protein_coding
ENSCSAT00000009393.1	2709	2551.51	85.599	100	cdna;chromosome:ChlSab1.1:11:2860935:2870383:1;gene:ENSCSAG00000011298.1;gene_biotype:protein_coding;transcript_biotype:protein_coding;gene_symbol:FKBP4;description:FKBP;prolyl;isomerase;4;[Source:NCBI;gene;(formerly;Entrezgene);Acc:103218381]
ENSCSAT00000003194.1	2382	2224.51	85.4183	87	cdna;chromosome:ChlSab1.1:9:103435343:103449171:1;gene:ENSCSAG00000005165.1;gene_biotype:protein_coding;transcript_biotype:protein_coding;gene_symbol:DUSP5;description:dual;specificity;phosphatase;5;[Source:HGNC;Symbol;Acc:HGNC:3071]
ENSCSAT00000000823.1	2561	2403.51	85.4177	94	cdna;chromosome:ChlSab1.1:5:74990410:75001988:-1;gene:ENSCSAG00000002802.1;gene_biotype:protein_coding;transcript_biotype:protein_coding;description:charged;multivesicular;body;protein;1A;[Source:NCBI;gene;(formerly;Entrezgene);Acc:103233482]
ENSCSAT00000008978.1	720	562.573	85.4103	22	cdna;chromosome:ChlSab1.1:22:41192484:41244822:1;gene:ENSCSAG00000010899.1;gene_biotype:protein_coding;transcript_biotype:protein_coding;gene_symbol:ARL8B;description:ADP;ribosylation;factor;like;GTPase;8B;[Source:HGNC;Symbol;Acc:HGNC:25564]
ENSCSAT00000007850.1	6397	6239.51	85.4094	244	cdna;chromosome:ChlSab1.1:25:73130448:73227349:-1;gene:ENSCSAG00000009768.1;gene_biotype:protein_coding;transcript_biotype:protein_coding;gene_symbol:NID1;description:nidogen;1;[Source:NCBI;gene;(formerly;Entrezgene);Acc:103230804]
ENSCSAT00000009864.1	3204	3046.51	85.3121	119	cdna;chromosome:ChlSab1.1:5:1200018:1216741:1;gene:ENSCSAG00000011775.1;gene_biotype:protein_coding;transcript_biotype:protein_coding;gene_symbol:UBE2I;description:ubiquitin;conjugating;enzyme;E2;I;[Source:HGNC;Symbol;Acc:HGNC:12485]
ENSCSAT00000011376.1	1233	1075.51	85.2904	42	cdna;chromosome:ChlSab1.1:2:33873339:33893556:1;gene:ENSCSAG00000013283.1;gene_biotype:protein_coding;transcript_biotype:protein_coding;gene_symbol:ITPA;description:inosine;triphosphatase;[Source:NCBI;gene;(formerly;Entrezgene);Acc:103247209]
ENSCSAT00000009663.1	965	807.518	85.1409	31.479	cdna;chromosome:ChlSab1.1:17:29101498:29106355:1;gene:ENSCSAG00000011591.1;gene_biotype:protein_coding;transcript_biotype:protein_coding;gene_symbol:MRPL2;description:mitochondrial;ribosomal;protein;L2;[Source:NCBI;gene;(formerly;Entrezgene);Acc:103221477]
[truncated: 18,424 more rows]
