# Supplementary figures and images for: Principles of RNA recruitment to viral ribonucleoprotein condensates in a segmented dsRNA virus
Source: eLife journal article supplement (doi:10.7554/elife.68670), 2023-01-26

# UDEX-FISH

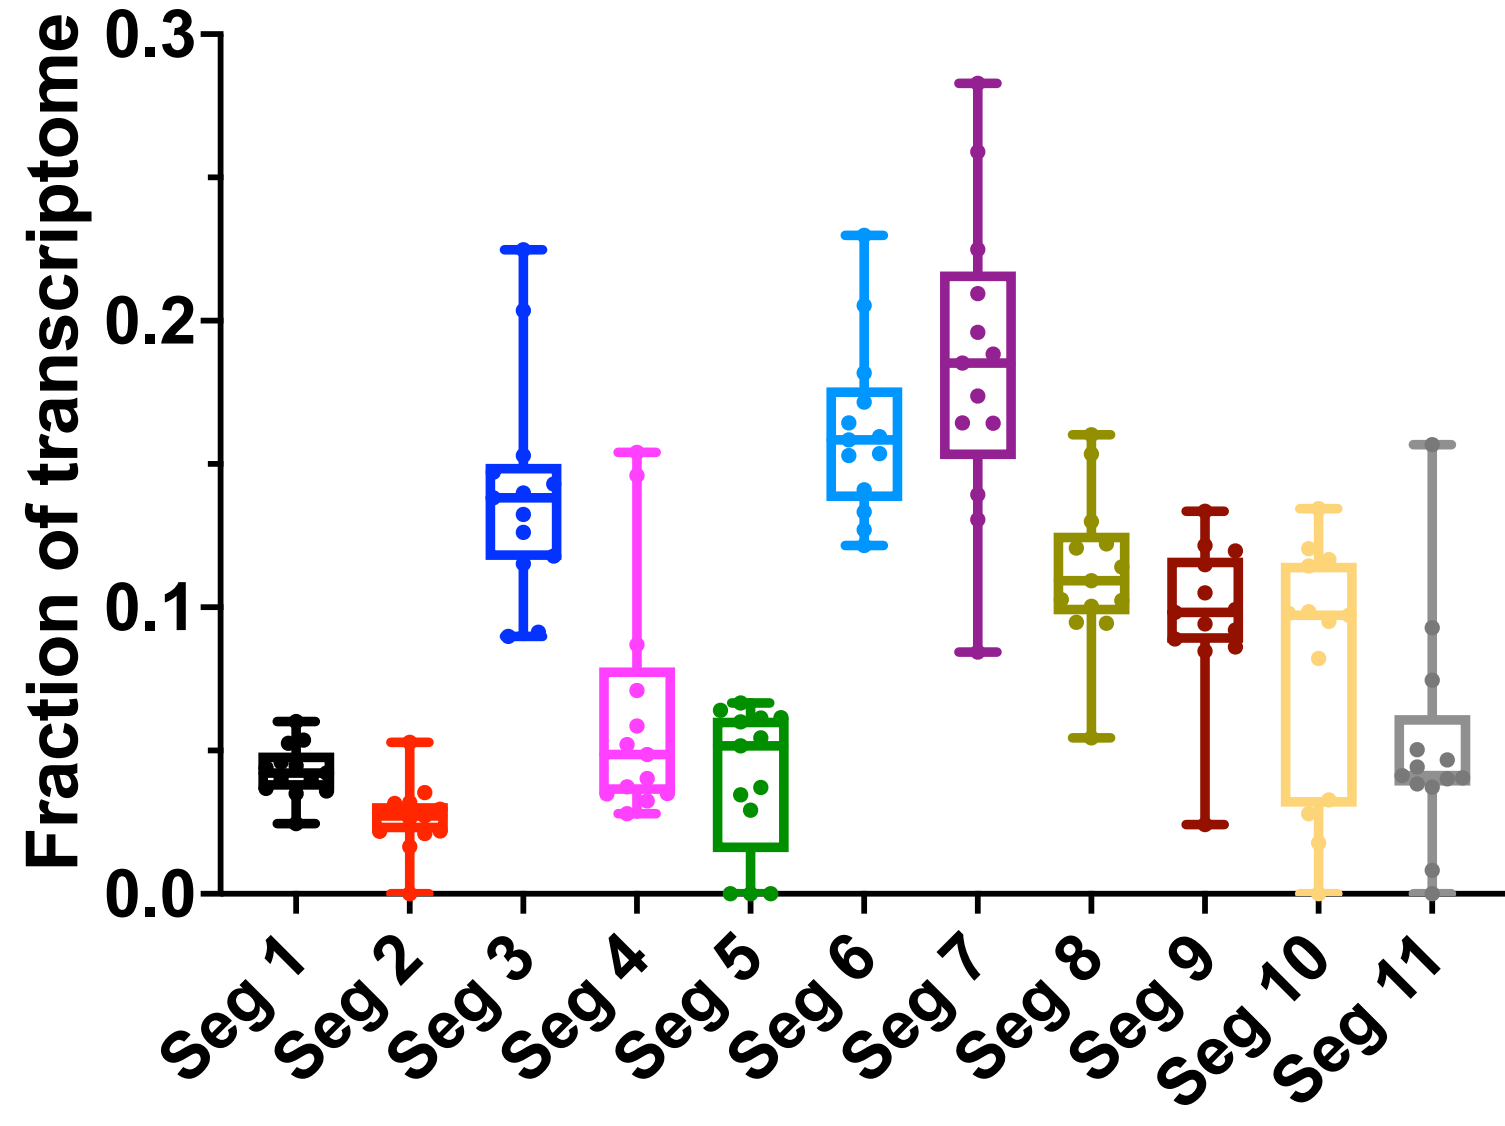

Supplement: supp [file elife-68670-supp-v1.zip]

● Seg4  
■ EGFP

## Data 1 - Fig.2 - source data 2

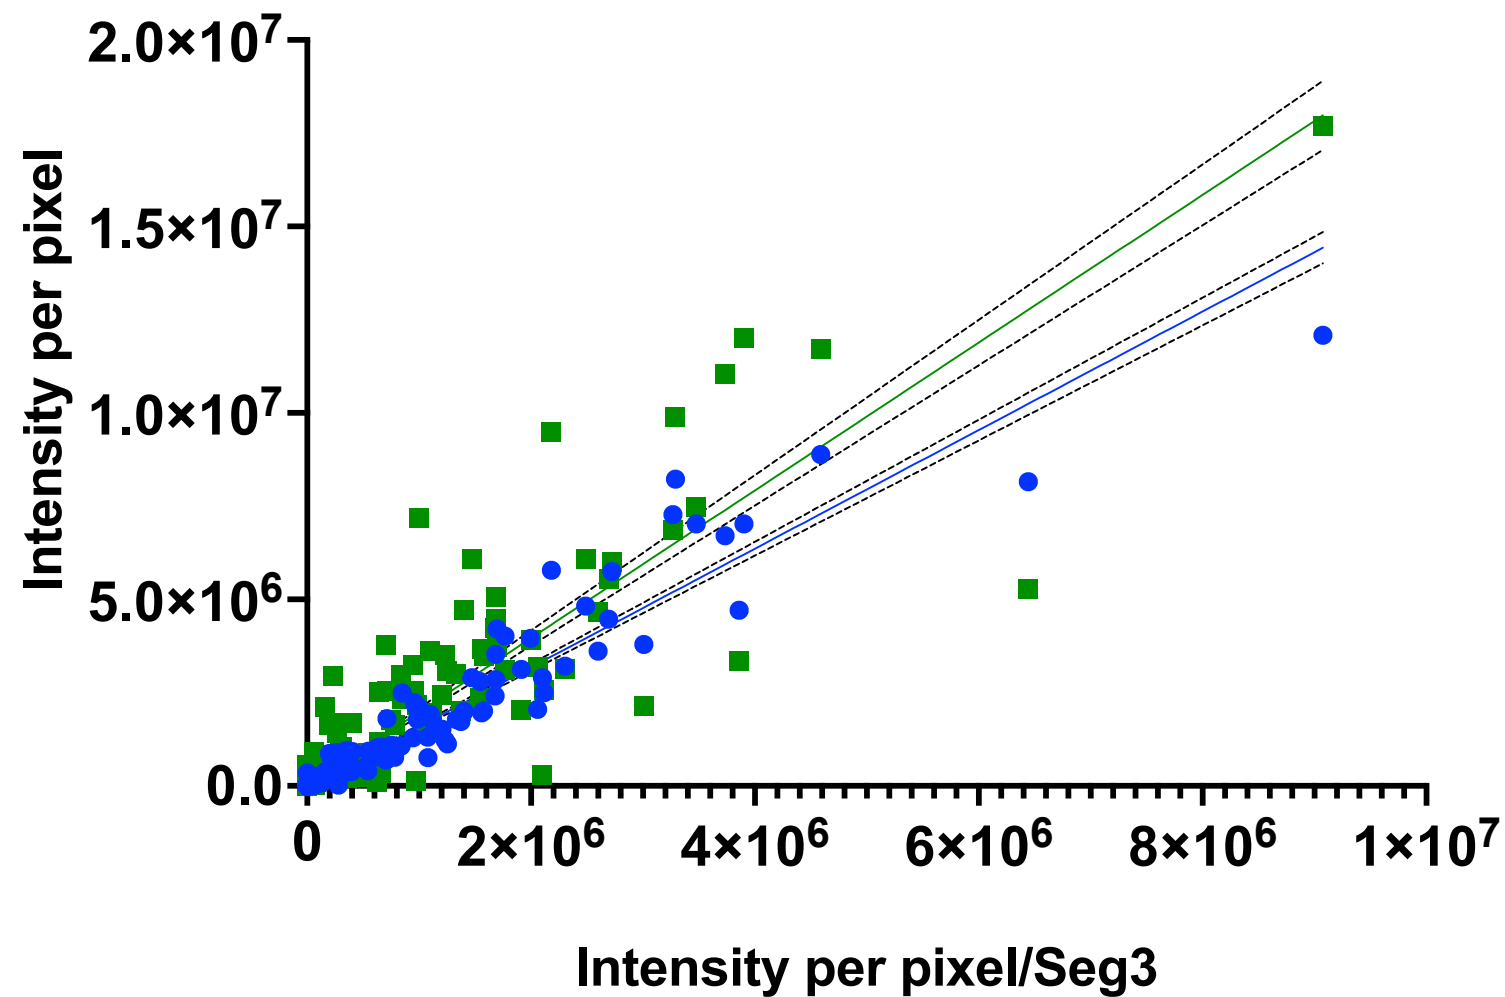

Supplement: supp [file elife-68670-supp-v1.zip]

**a**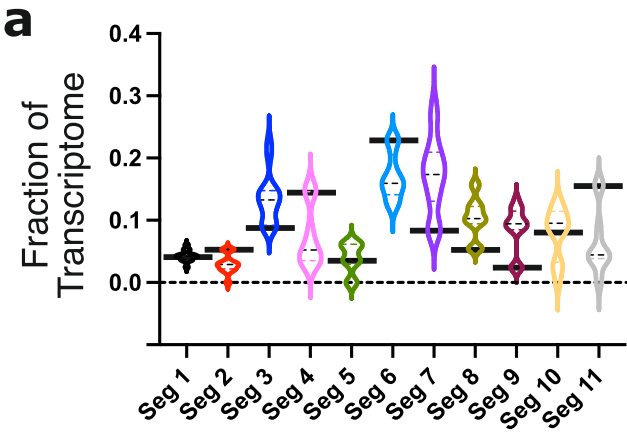**b**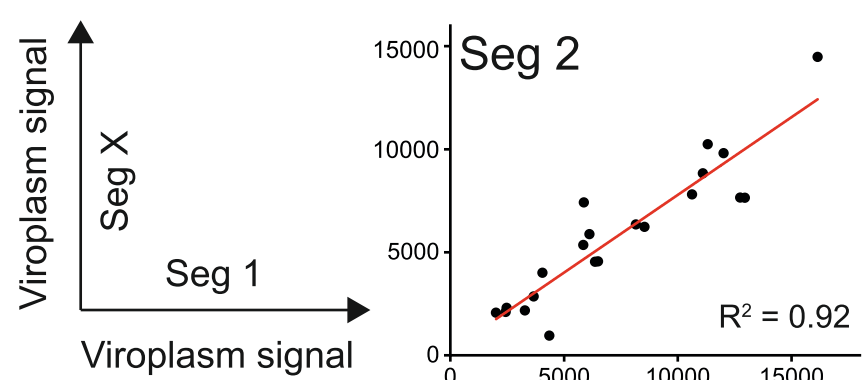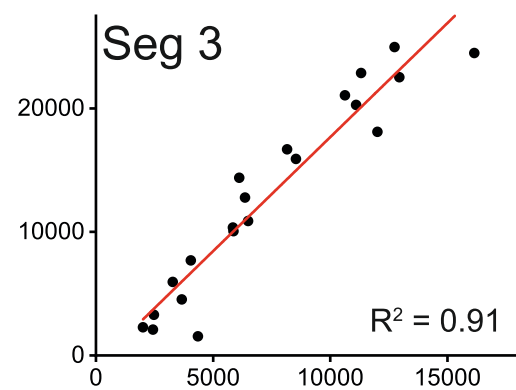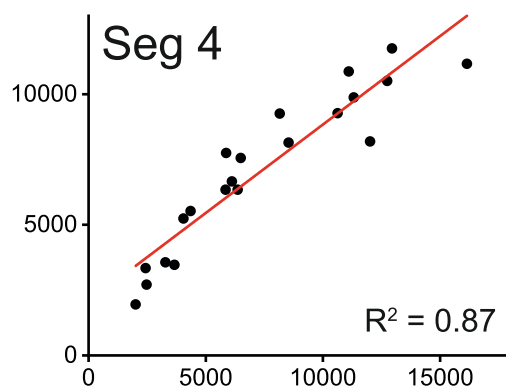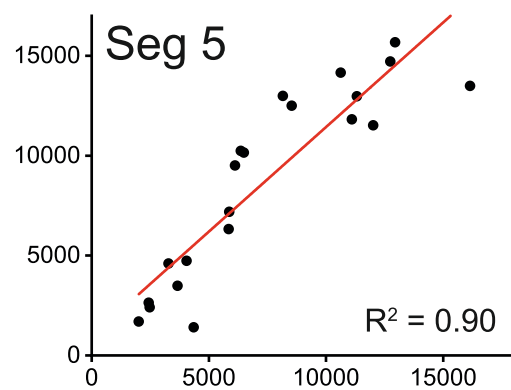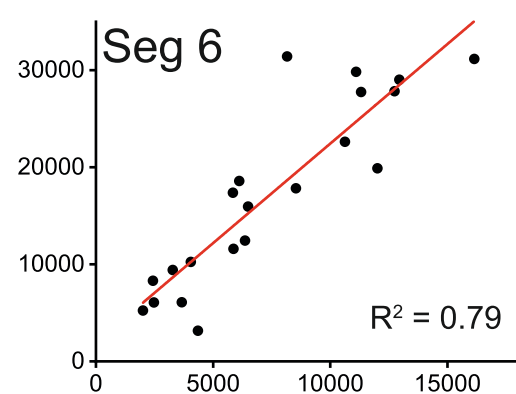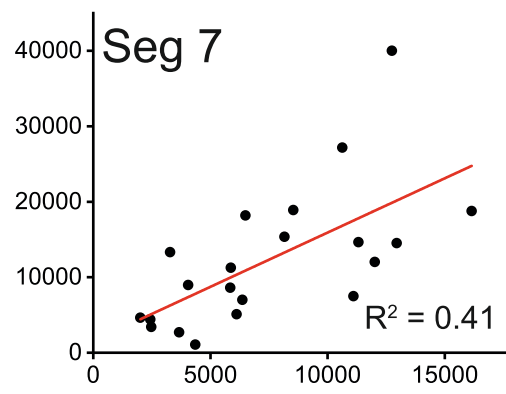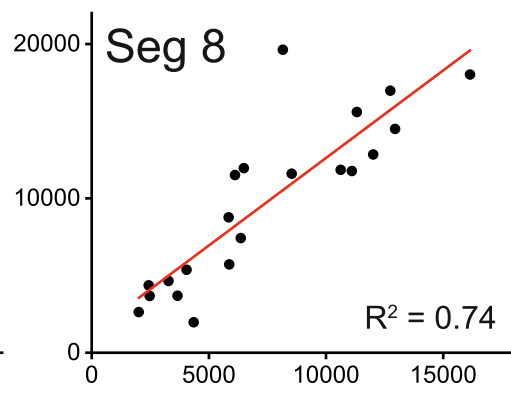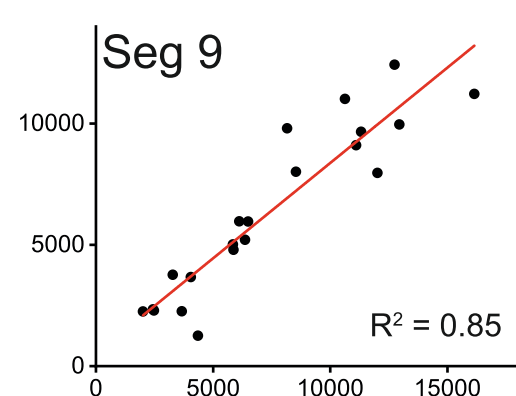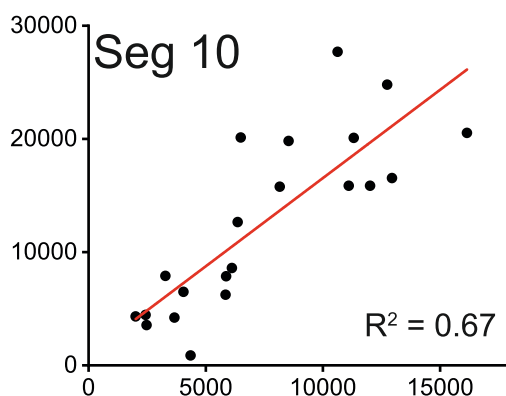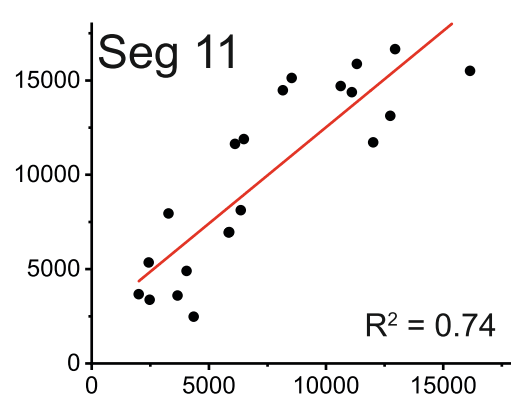

Supplement: supp [file elife-68670-supp-v1.zip]

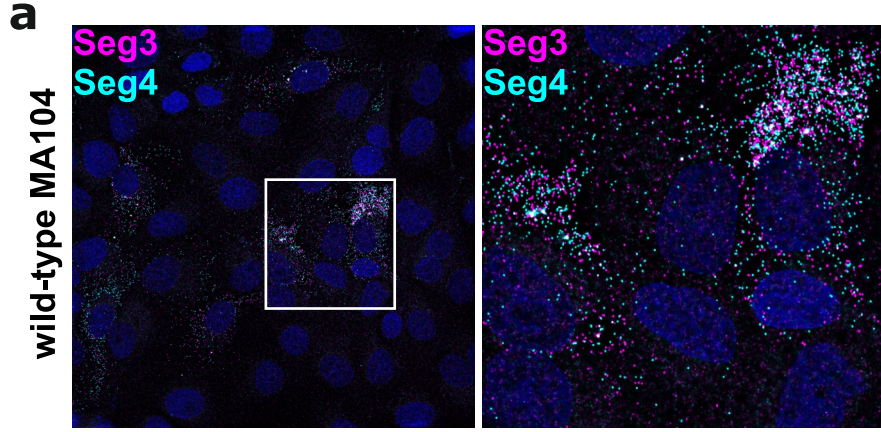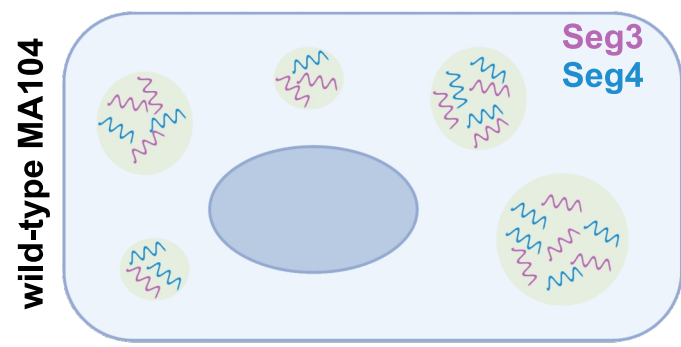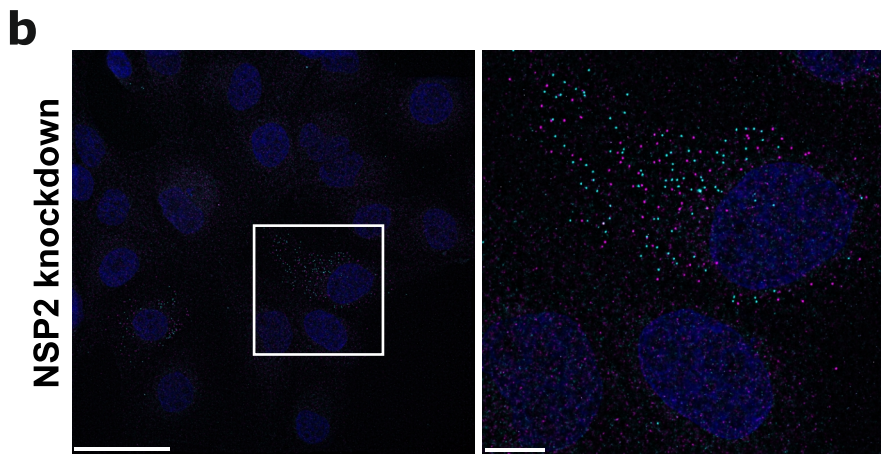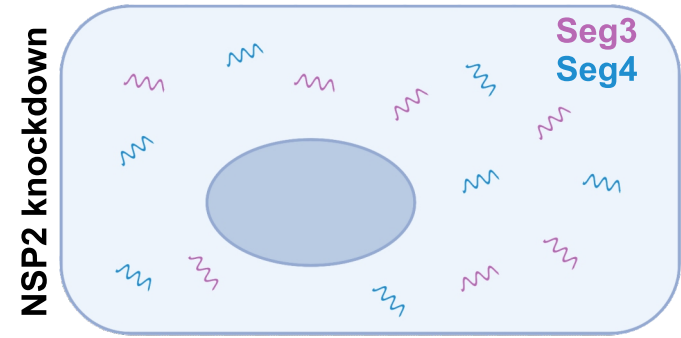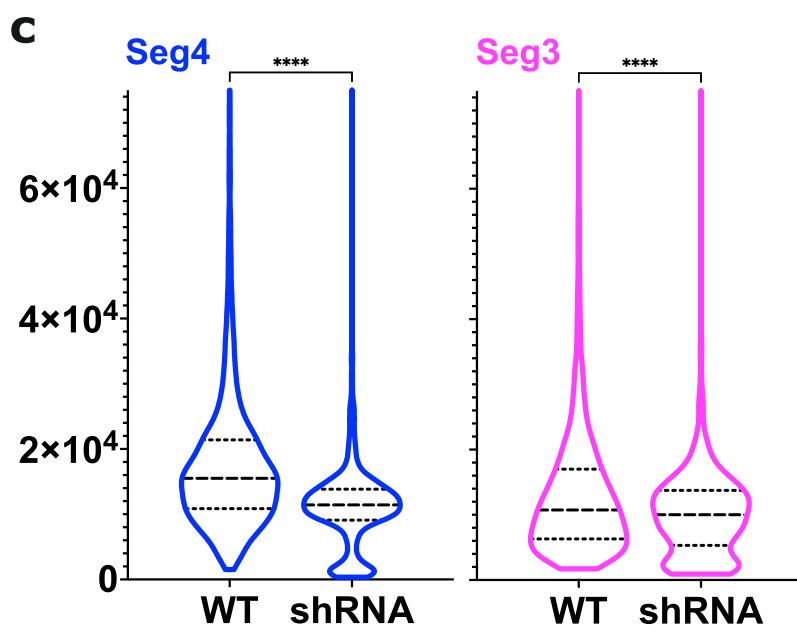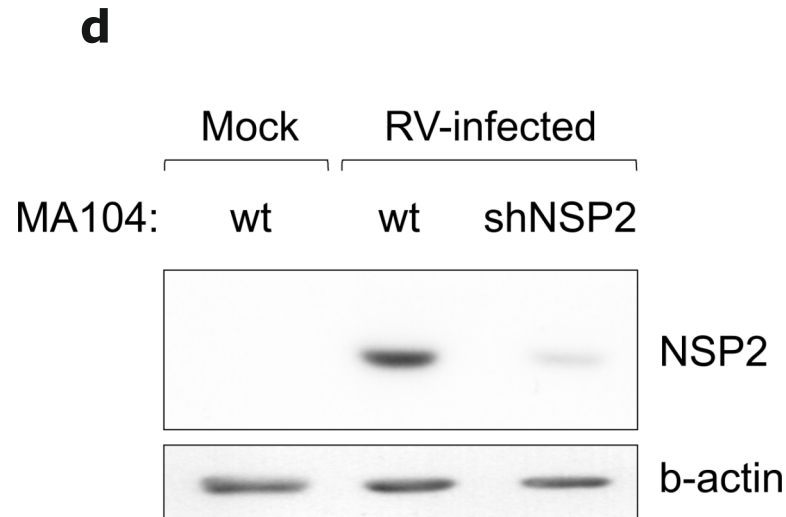

Supplement: supp [file elife-68670-supp-v1.zip]

polyA

viral RNA

NSP5-EGFP

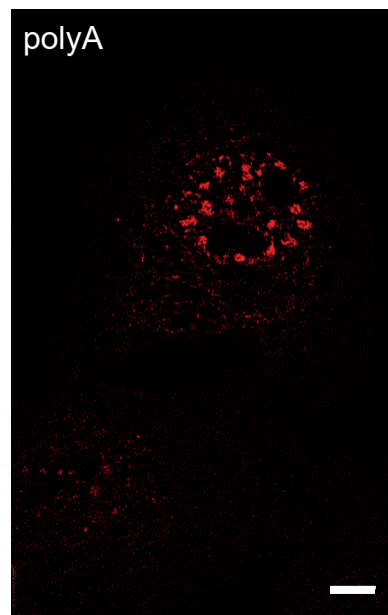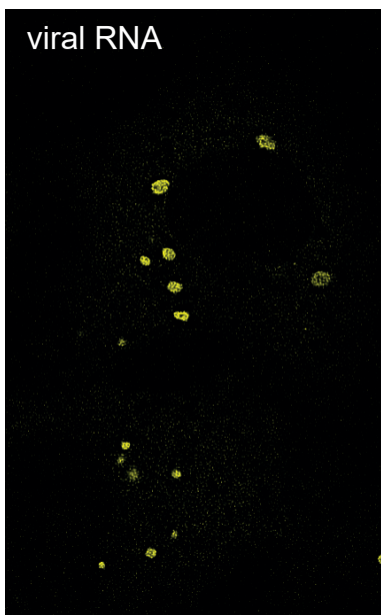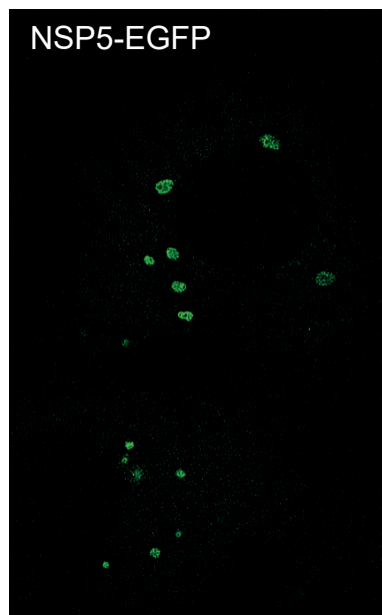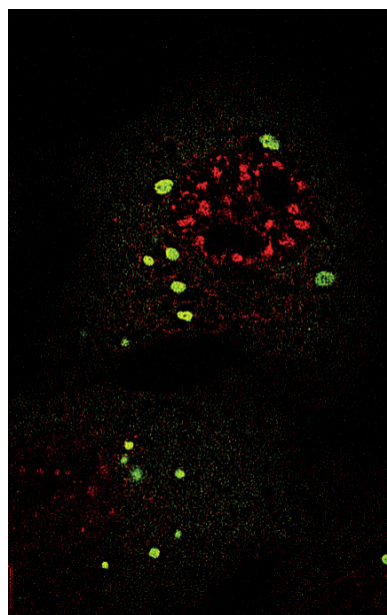

Supplement: supp [file elife-68670-supp-v1.zip]

**a**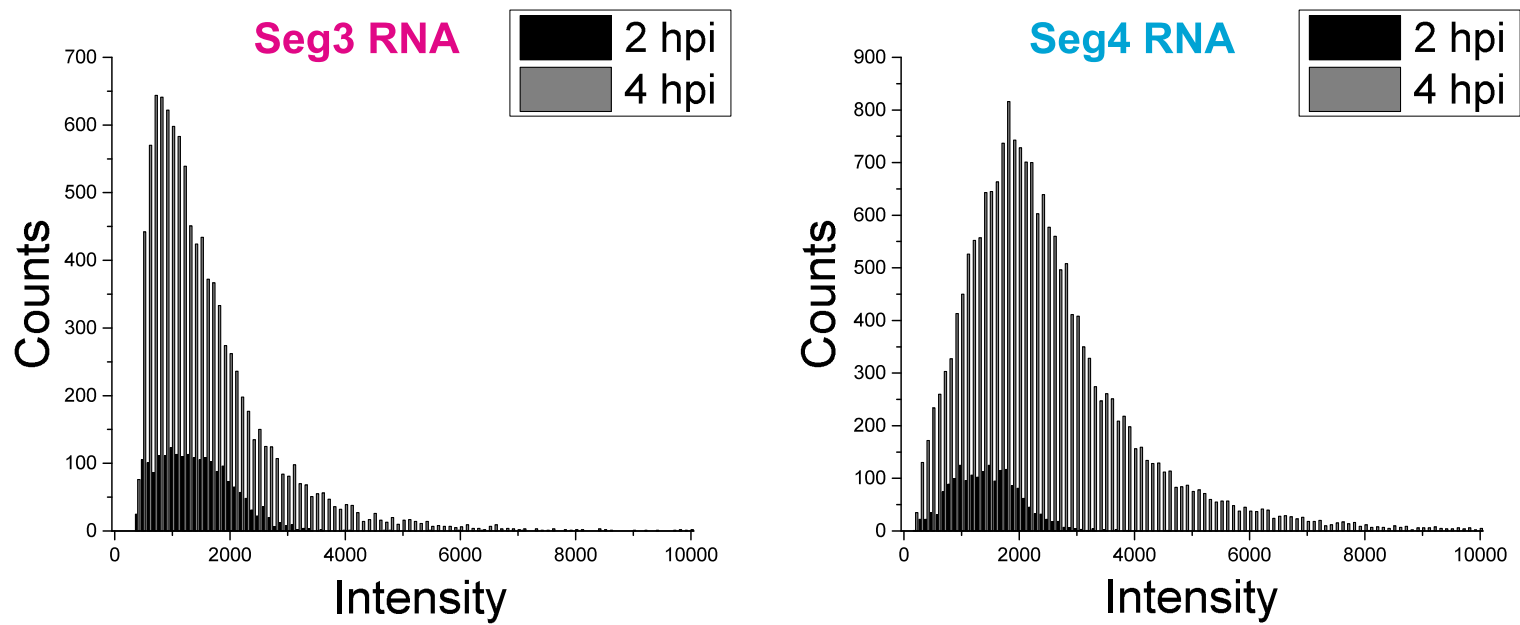**b**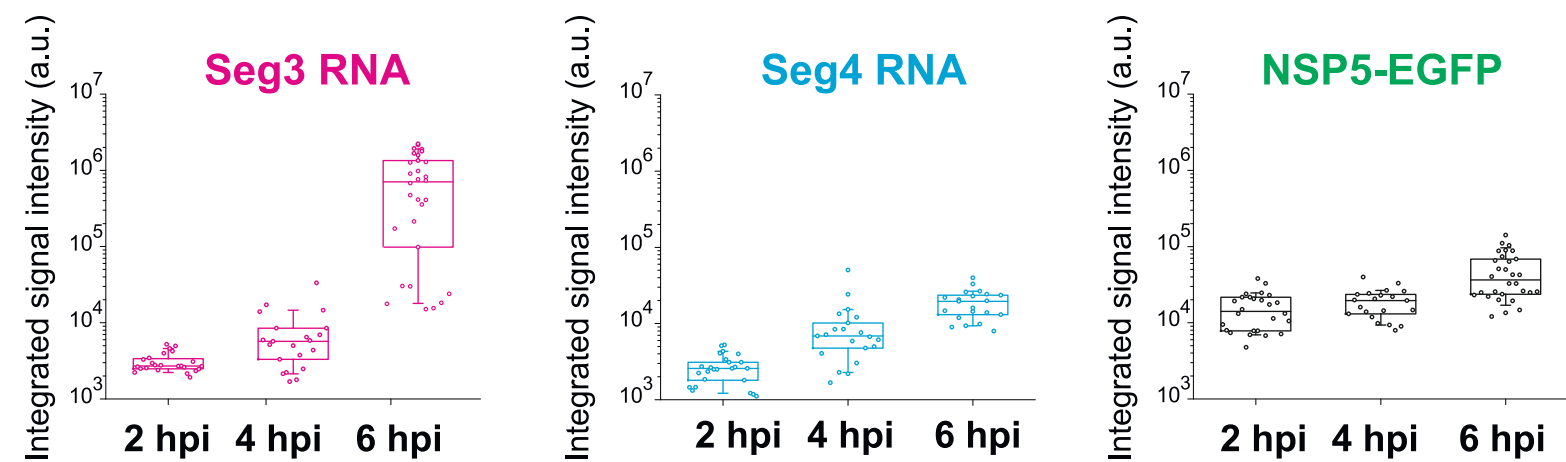**c**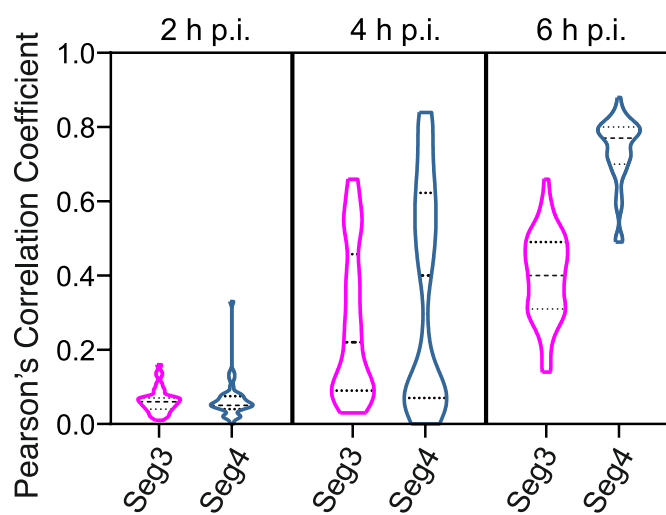**d**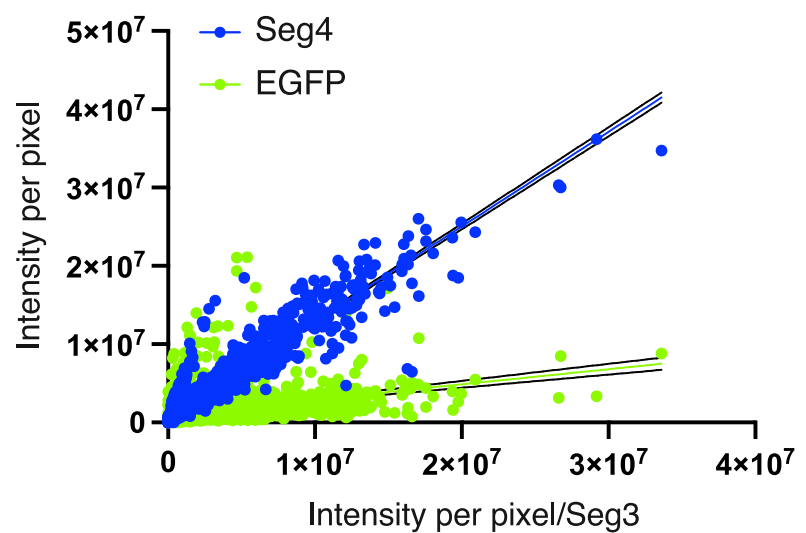

Supplement: supp [file elife-68670-supp-v1.zip]

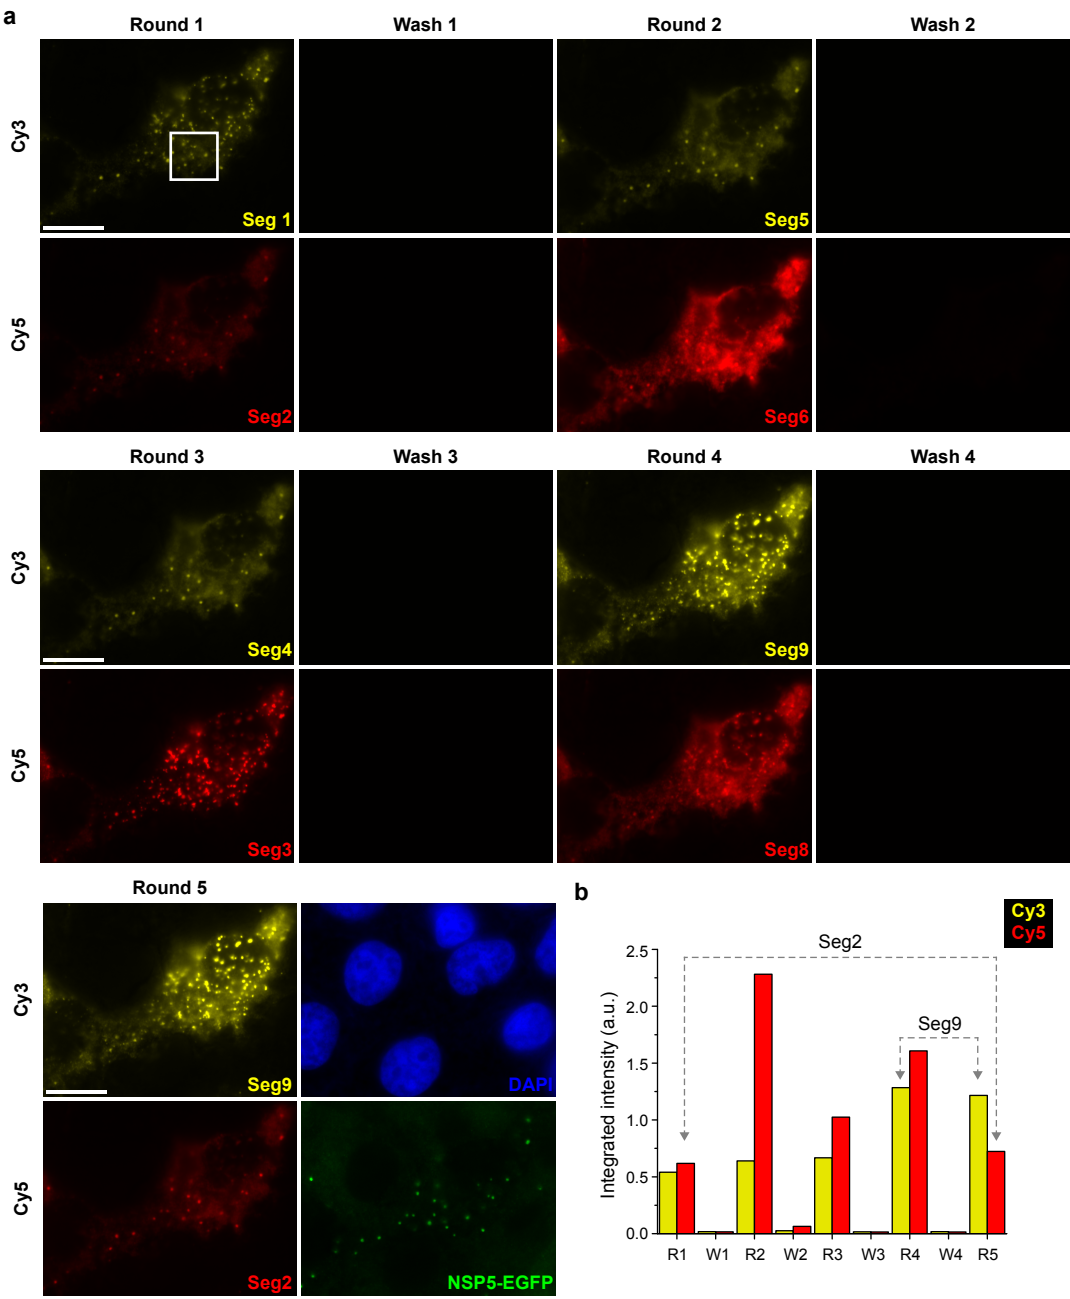

Supplement: supp [file elife-68670-supp-v1.zip]

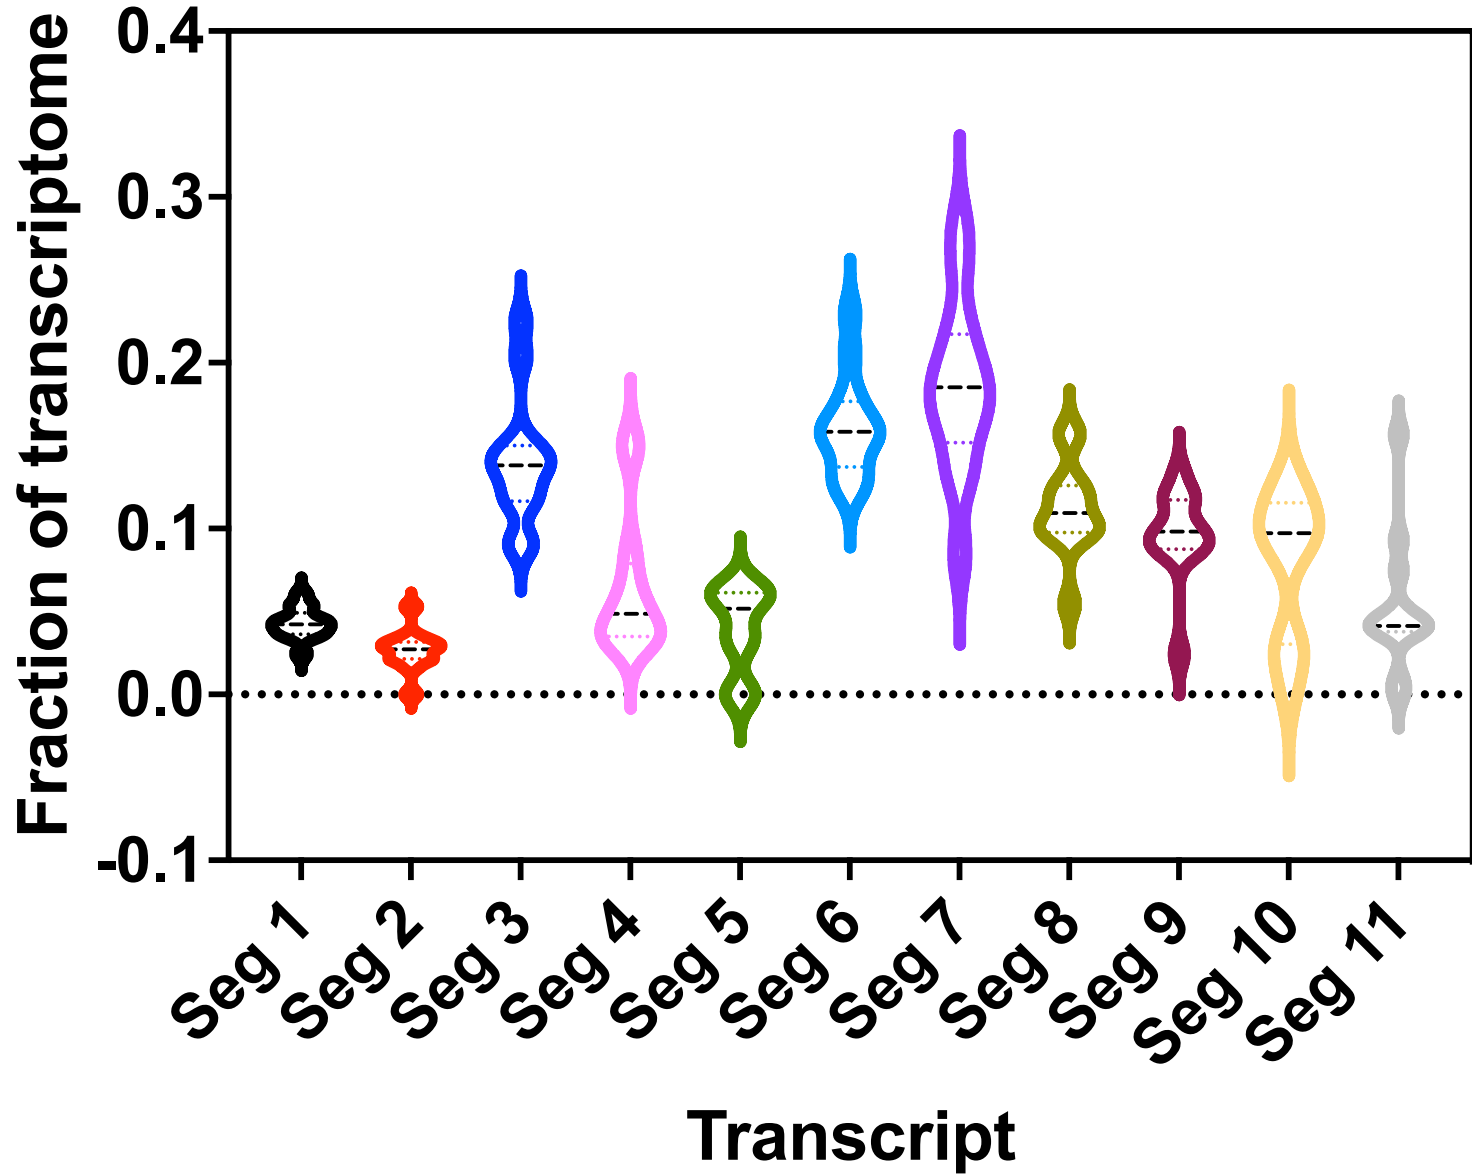

Supplement: supp [file elife-68670-supp-v1.zip]

**Figure 5 source 3**

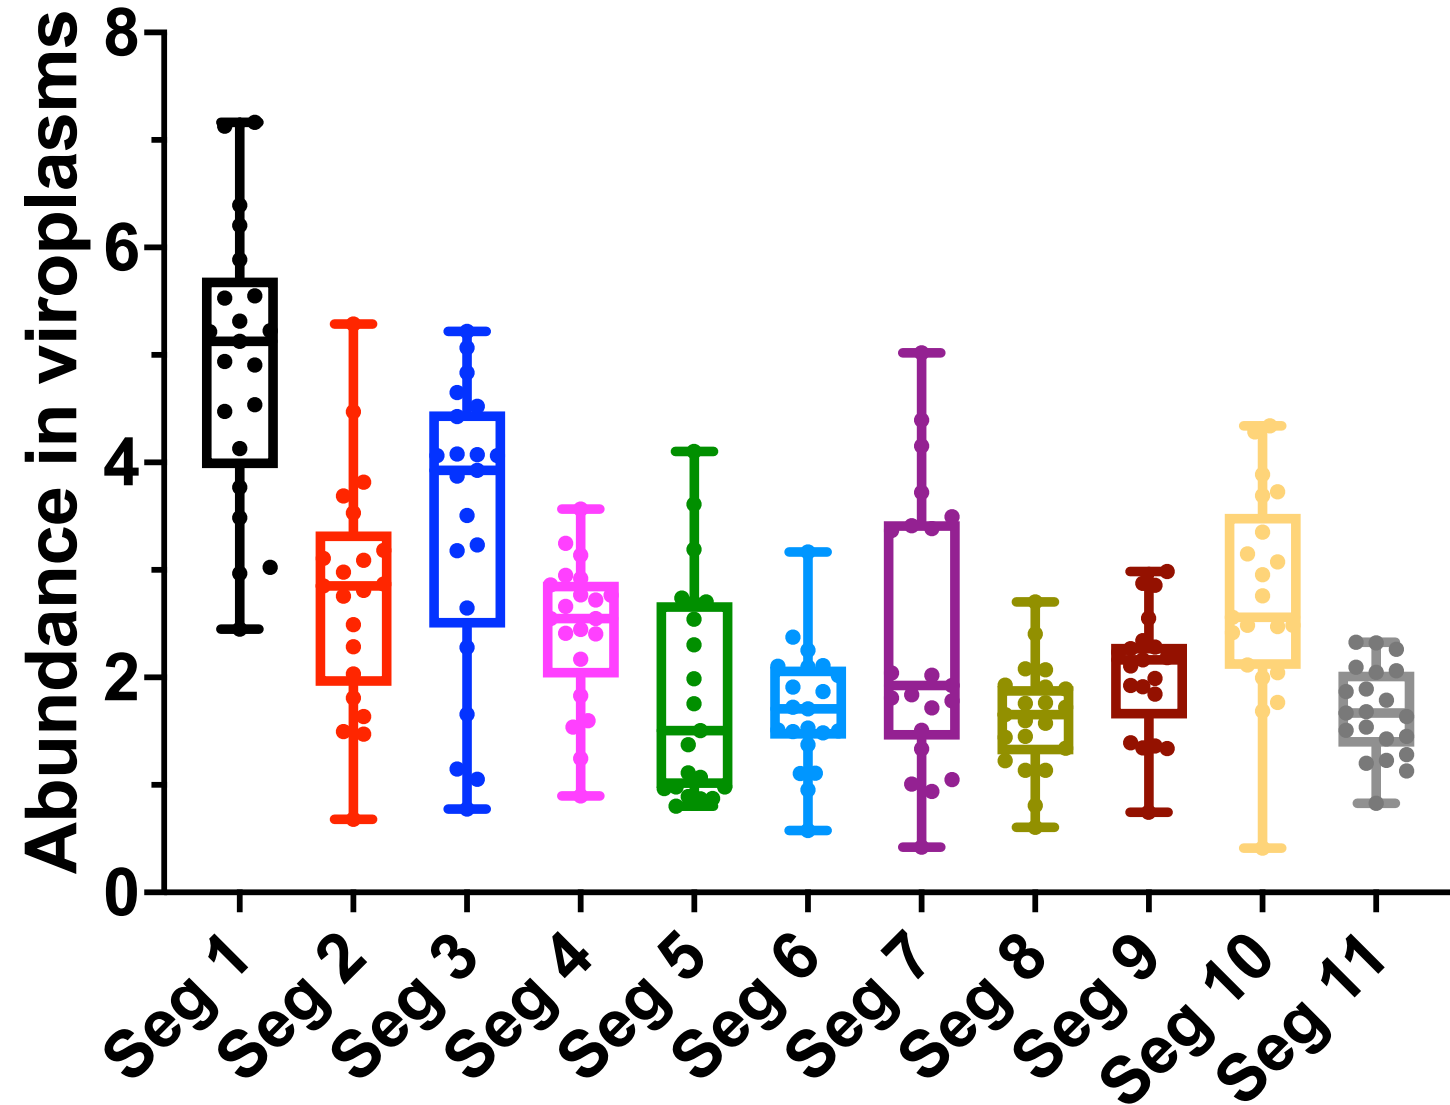

Supplement: supp [file elife-68670-supp-v1.zip]

- Seg4
- EGFP

## Data2 -Fig 2 - source data 6 - 6HPI

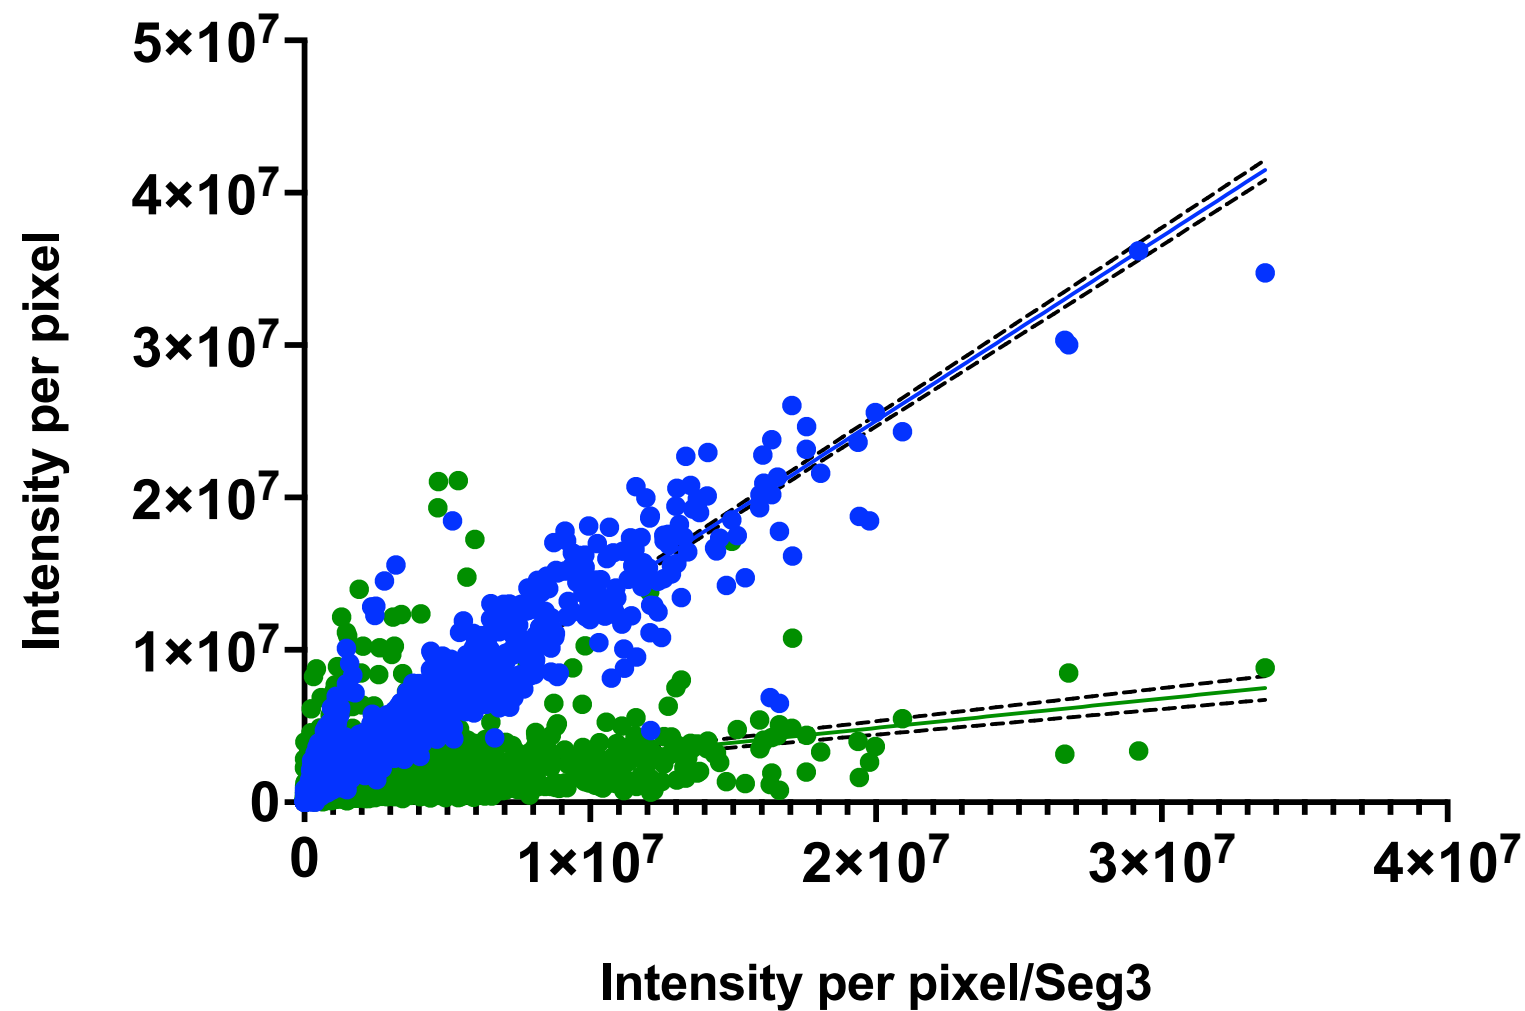

Supplement: supp [file elife-68670-supp-v1.zip]
